# Supplementary material for: Allosteric effects of the coupling cation in melibiose transporter MelB
Source: eLife. 2026 Jan 28;14:RP108335. doi: 10.7554/eLife.108335 (PMC12851581; doi:10.7554/eLife.108335)
Supplement: Figure 1—source data 1. [file elife-108335-fig1-data1.xlsx]

## Sheet: (a) a-NPG translocation
Fig 1 (a) a-NPG translocation
No addition								Na+								Li+
Time	WT MelBSt	SE	D59C MelB	SE	No mutant	SE		Time	WT MelBSt	SE	D59C MelB	SE	No mutant	SE		Time	WT MelBSt	SE	D59C MelB	SE	No mutant	SE
0	0	0	0	0	0	0		0	0	0	0	0	0	0		0	0	0	0	0	0	0
1	7.58316	0.27498	7.58316	0.27498	2.52772	0.82494		1	7.58316	0.27498	7.58316	0.27498	1.9444	0		1	7.58316	0.27498	7.58316	0.27498	5.8332	2.7498
5	31.1104	1.09992	18.0829	0.82494	8.36092	0.82494		5	45.9851	1.23741	15.6524	0.13749	2.23606	0.13749		5	20.319	0.41247	17.4996	3.55271e-15	3.01382	1.23741
10	50.1655	1.3749	34.4159	0	9.33312	3.29976		10	95.8589	1.92486	32.0826	4.67465	5.54154	0.41247		10	35.5825	0.82494	33.3465	0.13749	8.65258	1.51239
20	101.692	1.92486	78.3593	3.57474	14.1941	0.82494		20	122.594	0.96243	69.5123	0.96243	10.6942	0.27498		20	79.3315	2.19984	77.0955	0.96243	9.81922	2.61231
30	142.038	5.63708	114.622	2.61231	11.9581	0.68745		30	133.775	2.19984	105.289	1.23741	13.2219	0.54996		30	117.247	3.57474	113.164	5.49959	11.1803	1.23741
60	230.023	17.0487	191.718	0	14.6122	1.60863		60	206.69	6.32453	171.691	0.82494	13.9997	1.3749		60	185.301	10.1743	177.524	10.1743	11.8608	1.64988

## Sheet: (b) Raffinose transport
Fig. 1 (b) Raffinose transport
No addition								Na+								Li+
Time	WT MelBSt	SE	D59C MelB	SE	No mutant	SE		Time	WT MelBSt	SE	D59C MelB	SE	No mutant	SE		Time	WT MelBSt	SE	D59C MelB	SE	No mutant	SE
0	0	0	0	0	0	0		0	0	0	0	0	0	0		0	0	0	0	0	0	0
0.08333	0.7092	0.10638	0.36642	0.07486	0.40779	0.01379		0.08333	1.52281	0.24625	0.36642	0.41173	1.82225	0.37233		0.08333	1.29823	0.18321	0.32899	0.24231	0.61858	0.00788
0.16667	2.57479	0.61267	0.70526	0.1379	0.71511	0.03349		0.16667	1.94833	0.30929	0.70526	0.2955	1.8321	0.06304		0.16667	1.65283	0.02167	0.62449	0.02167	0.29747	0.12017
0.5	5.39977	0.32505	0.93575	0.09259	0.88847	0.12411		0.5	2.61813	0.00985	0.93575	0.0591	1.15245	0.13987		0.5	3.99319	0.31323	1.17806	0.3349	1.21549	0.00985
1	8.25233	0.16745	1.78876	0.07092	1.27459	0.08471		1	4.93288	0.63434	1.78876	0.17139	1.27065	0.15169		1	6.67436	0	2.26747	1.08153	1.82619	0.01379
2	11.3846	1.32187	3.53615	0.16351	3.63662	1.28838		2	6.91273	0.47477	3.53615	0.70526	2.03304	0.197		2	10.2046	0.67768	2.45856	0.59888	2.31081	0.06501
5	18.9691	0.06501	5.97895	0.12411	3.39234	0.07092		5	15.3719	1.04213	5.97895	0.09062	3.11654	0.11032		5	15.5413	0.24231	4.76149	0.13593	3.20322	0.03546
10	25.2948	0.394	7.92925	0.38021	2.59252	0.591		10	24.4654	1.16033	7.92925	0.47477	3.51645	0.13199		10	23.445	0.92393	7.07033	0.52599	4.0779	0.11426
30	43.8699	0.91211	12.3105	0.27383	2.87029	0.57327		30	53.0856	2.25171	12.3105	0.48265	3.65632	0.00394		30	41.634	0.85104	9.49146	0.0591	3.73709	0.15169

## Sheet: © a-MG binding ITC
Fig. 1 (c) α-MG binding ITC
WT MelBSt ITC thermogram							D59C mutant ITC thermogram							WT melBSt curve fitting									D59C mutant curve fitting										WT MelBSt (n=2)								D59C mutant (n=2)
	Test1		Test 2		control			Test1		Test 2		control		Test1				Test 2					Test1				Test 2
Time (s)	Corrected Heat Rate (µJ/s)			Time (s)	Corrected Heat Rate (µJ/s)		Time (s)	Corrected Heat Rate (µJ/s)	Time (s)	Corrected Heat Rate (µJ/s)	Time (s)	Corrected Heat Rate (µJ/s)		Mole Ratio	Q (µJ)	Mole Ratio	Fit (µJ)	Mole Ratio	Q (µJ)	Mole Ratio	Fit (µJ)		Mole Ratio	Q (µJ)	Mole Ratio	Fit (µJ)	Mole Ratio	Q (µJ)	Mole Ratio	Fit (µJ)					Test 1	Test 2					Models			Test 1	Test 2
1	2.84217e-08	1	0.000221709	1	2.84217e-14		0	-0.00704	0	0.0181388	0	-0.01281		2.12961	-14.7971	2.11663	-15.2485	2.12961	-13.5294	2.11663	-13.8077		19.5	-41.6463	19.4102	-43.1381	19.5	-25.9316	19.4102	-27.5398			Model	Variable	Value	Value	Avg	SD	SE		Experiment	Model	Variable	Value	Value	Avg	SD	SE
2	0.0001	2	0.0001	2	-0.0008		1	-0.00724	1	0.0184388	1	-0.01231		3.92742	-11.594	2.29389	-14.7914	3.92742	-10.2296	2.29389	-13.4156		35.2702	-33.6993	21.3601	-41.7677	35.2702	-22.2393	21.3601	-26.7051			Independent	Kd (M)	0.0009237	0.0008345	0.0008791	6.30739e-05	4.46e-05			Independent	Kd (M)	0.009866	0.009303	0.0095845	0.000398101	0.0002815
3	0.000166069	3	-0.000422336	3	-0.00102		2	-0.00754	2	0.0186388	2	-0.01191		5.75346	-8.69805	2.47142	-14.3526	5.75346	-8.59795	2.47142	-13.0382		51.2363	-27.6589	23.313	-40.4592	51.2363	-19.0124	23.313	-25.9065				n	1	1							n	1	1
4	0.000399103	4	-0.000103791	4	-0.00148		3	-0.00784	3	0.0188388	3	-0.01161		7.60818	-7.3337	2.64922	-13.931	7.60818	-6.52762	2.64922	-12.6751		67.4007	-23.0192	25.269	-39.2092	67.4007	-15.9926	25.269	-25.1418				ΔH (kJ/mol)	-8.352	-7.921							ΔH (kJ/mol)	-20.72	-30.92
5	0.000632138	5	0.000392566	5	-0.00194		4	-0.00804	4	0.0190388	4	-0.01141		9.49202	-6.56149	2.8273	-13.5259	9.49202	-5.94954	2.8273	-12.3254		83.7659	-19.7415	27.2279	-38.0141	83.7659	-11.95	27.2279	-24.4092				Ka (Mˉ¹)	1083	1198							Ka (Mˉ¹)	101.4	107.5
6	0.000665172	6	0.000688924	6	-0.0025		5	-0.00804	5	0.0190388	5	-0.01141		11.4054	-5.12735	3.00566	-13.1366	11.4054	-4.99046	3.00566	-11.9886		100.334	-16.6581	29.1899	-36.8709	100.334	-10.3104	29.1899	-23.7071				-TΔS (kJ/mol)	-8.968	-9.651							-TΔS (kJ/mol)	9.272	19.32
7	0.000698207	7	0.000985282	7	-0.00307		6	-0.00794	6	0.0190388	6	-0.01151		13.3489	-2.9052	3.18429	-12.7622	13.3489	-3.65974	3.18429	-11.6641		117.109	-14.1016	31.1548	-35.7766	117.109	-8.27704	31.1548	-23.0336				ΔG (kJ/mol)	-17.32	-17.57							ΔG (kJ/mol)	-11.45	-11.6
8	0.000431241	8	0.00098164	8	-0.00363		7	-0.00774	7	0.0190388	7	-0.01161		15.3229	-2.91885	3.3632	-12.402	15.3229	-1.5575	3.3632	-11.3514		134.092	-12.2613	33.1228	-34.7286	134.092	-8.41131	33.1228	-22.3874				ΔS (J/mol·K)	30.08	32.37							ΔS (J/mol·K)	-31.1	-64.81
9	0.000164276	9	0.000977997	9	-0.00419		8	-0.00754	8	0.0189388	8	-0.01161		17.3279	-2.04735	3.54238	-12.0555	17.3279	-2.78687	3.54238	-11.05		151.285	-9.7734	35.0938	-33.7243	151.285	-7.70227	35.0938	-21.7669
10	-0.00020269	10	0.000874355	10	-0.00455		9	-0.00744	9	0.0189388	9	-0.01151		19.3644	-2.70725	3.72185	-11.722	19.3643	-2.92217	3.72185	-10.7594		168.692	-8.96212	37.0678	-32.7612	168.692	-5.00903	37.0678	-21.1709
11	-0.000569655	11	0.000770713	11	-0.00491		10	-0.00744	10	0.0189388	10	-0.01131		21.4328	-2.24334	3.90159	-11.4009	21.4328	-2.24382	3.90159	-10.479		186.316	-8.06457	39.0449	-31.8373	186.316	-3.98896	39.0449	-20.5981
12	-0.00104	12	0.000567071	12	-0.00497		11	-0.00754	11	0.0190388	11	-0.01111		23.5337	-1.85965	4.08161	-11.0917	23.5337	-1.85231	4.08161	-10.2085		204.158	-7.16166	41.025	-30.9505	204.158	-5.03079	41.025	-20.0473
13	-0.0012	13	0.000651696	13	-0.00493		12	-0.00764	12	0.0192388	12	-0.01071		25.6676	-0.7689	4.26191	-10.7938	25.6676	-1.05155	4.26191	-9.94748		222.222	-4.36014	43.0081	-30.0988	222.222	-5.63836	43.0081	-19.5174
14	-0.00137	14	0.000734601	14	-0.00479		13	-0.00774	13	0.0192388	13	-0.01041		27.8351	-0.2382	4.44248	-10.5067	27.8351	0.0282004	4.44248	-9.69545		240.511	-4.75966	44.9943	-29.2804	240.511	-2.02063	44.9943	-19.0074
15	-0.00144	15	0.000917507	15	-0.00465		14	-0.00784	14	0.0190388	14	-0.00991		30.0365	-0.2134	4.62334	-10.2299	30.0365	-0.705284	4.62334	-9.45207		259.027	-3.39033	46.9836	-28.4937	259.027	-1.48974	46.9836	-18.5164
16	-0.0015	16	0.00110041	16	-0.00441		15	-0.00794	15	0.0188388	15	-0.00951		32.2726	-1.3581	4.80448	-9.96299	32.2726	-0.498395	4.80448	-9.21696		277.772	-2.96719	48.9759	-27.737	277.772	-3.60203	48.9759	-18.0433
17	-0.00167	17	0.00118332	17	-0.00417		16	-0.00814	16	0.0185388	16	-0.00901		34.5437	-0.73386	4.9859	-9.70552	34.5437	-0.806638	4.9859	-8.9898		296.751	-1.16118	50.9712	-27.0088	296.751	-0.231561	50.9712	-17.5874
18	-0.00194	18	0.00116623	18	-0.00383		17	-0.00824	17	0.0182388	17	-0.00861		36.8505	-0.31048	5.16759	-9.45709	36.8505	-0.249363	5.16759	-8.77023		315.965	-2.52628	52.9696	-26.3078	315.965	-1.62704	52.9696	-17.1479
19	-0.00231	19	0.00104913	19	-0.0035		18	-0.00834	18	0.0179388	18	-0.00811		39.1935	-0.0482	5.34957	-9.2173	39.1935	-0.225683	5.34957	-8.55796		335.418	-0.96036	54.9711	-25.6327	335.418	-1.10958	54.9711	-16.724
20	-0.00257	20	0.00103204	20	-0.00306		19	-0.00844	19	0.0177388	19	-0.00761				5.53184	-8.98577			5.53184	-8.35268		355.113	-2.26286	56.9757	-24.9821	355.113	-1.42202	56.9757	-16.3149
21	-0.00274	21	0.00111494	21	-0.00262		20	-0.00864	20	0.0176388	20	-0.00701				5.71438	-8.76217			5.71438	-8.1541		375.052	-0.88891	58.9833	-24.355	375.052	-1.78951	58.9833	-15.92
22	-0.00271	22	0.00139785	22	-0.00208		21	-0.00874	21	0.0174388	21	-0.00631				5.89721	-8.54614			5.89721	-7.96195		395.239	-0.30347	60.9941	-23.7502	395.239	-0.525542	60.9941	-15.5386
23	-0.0027	23	0.00168075	23	-0.00154		22	-0.00874	22	0.0172388	22	-0.00571				6.08032	-8.33738			6.08032	-7.77598		415.677	-0.09543	63.0079	-23.1668	415.677	-0.0245733	63.0079	-15.1702
24	-0.00277	24	0.00193457	24	-0.000899353		23	-0.00874	23	0.0169388	23	-0.00521				6.26371	-8.13558			6.26371	-7.59593		436.368	-0.47392	65.0248	-22.6036	436.368	-0.982559	65.0248	-14.8142
25	-0.00294	25	0.00175537	25	-0.000360194		24	-0.00864	24	0.0166388	24	-0.00481				6.44739	-7.94045			6.44739	-7.42158				67.0448	-22.0599			67.0448	-14.47
26	-0.00312	26	0.00157617	26	0.000178964		25	-0.00854	25	0.0161388	25	-0.00451				6.63135	-7.75171			6.63135	-7.2527				69.0679	-21.5348			69.0679	-14.1372
27	-0.00339	27	0.00129697	27	0.000518123		26	-0.00844	26	0.0156388	26	-0.00411				6.81559	-7.56911			6.81559	-7.08907				71.0941	-21.0273			71.0941	-13.8152
28	-0.00356	28	0.00111777	28	0.000857282		27	-0.00834	27	0.0151388	27	-0.00381				7.00012	-7.3924			7.00012	-6.93049				73.1235	-20.5368			73.1234	-13.5035
29	-0.00364	29	0.00103857	29	0.0012		28	-0.00834	28	0.0145388	28	-0.00341				7.18494	-7.22134			7.18494	-6.77676				75.1559	-20.0625			75.1559	-13.2018
30	-0.00361	30	0.00105937	30	0.00144		29	-0.00834	29	0.0140388	29	-0.00311				7.37005	-7.0557			7.37005	-6.62771				77.1915	-19.6037			77.1915	-12.9097
31	-0.00378	31	0.000880172	31	0.00177		30	-0.00844	30	0.0134388	30	-0.00281				7.55544	-6.89526			7.55544	-6.48314				79.2302	-19.1598			79.2302	-12.6267
32	-0.00396	32	0.000700973	32	0.00201		31	-0.00844	31	0.0128388	31	-0.00271				7.74111	-6.73983			7.74111	-6.3429				81.272	-18.7301			81.272	-12.3524
33	-0.00423	33	0.000421773	33	0.00225		32	-0.00854	32	0.0122388	32	-0.00241				7.92708	-6.58921			7.92708	-6.20681				83.317	-18.314			83.317	-12.0866
34	-0.0046	34	4.2574e-05	34	0.00229		33	-0.00874	33	0.0115388	33	-0.00211				8.11333	-6.44321			8.11333	-6.07473				85.3651	-17.911			85.3651	-11.8289
35	-0.00498	35	-0.000336625	35	0.00223		34	-0.00884	34	0.0107388	34	-0.00171				8.29987	-6.30165			8.29987	-5.94651				87.4163	-17.5206			87.4163	-11.5789
36	-0.00535	36	-0.000715825	36	0.00197		35	-0.00884	35	0.0100388	35	-0.00121				8.4867	-6.16437			8.4867	-5.822				89.4707	-17.1422			89.4707	-11.3364
37	-0.00572	37	-0.00109502	37	0.00161		36	-0.00884	36	0.0094388	36	-0.000906541				8.67382	-6.03119			8.67382	-5.70107				91.5283	-16.7753			91.5283	-11.101
38	-0.00599	38	-0.00137422	38	0.00125		37	-0.00894	37	0.0091388	37	-0.000606541				8.86123	-5.90197			8.86123	-5.58359				93.589	-16.4195			93.589	-10.8726
39	-0.00617	39	-0.00155342	39	0.000988026		38	-0.00914	38	0.0088388	38	-0.000406541				9.04893	-5.77656			9.04893	-5.46944				95.6529	-16.0744			95.6529	-10.6507
40	-0.00634	40	-0.00173262	40	0.000627184		39	-0.00944	39	0.0085388	39	-0.000306541				9.23692	-5.65481			9.23692	-5.35849				97.7199	-15.7395			97.7199	-10.4353
41	-0.00641	41	-0.00181182	41	0.000166343		40	-0.00964	40	0.0082388	40	-0.000306541				9.4252	-5.5366			9.4252	-5.25064				99.7902	-15.4145			99.7902	-10.226
42	-0.00659	42	-0.00199102	42	-0.000294498		41	-0.00984	41	0.0078388	41	-0.000306541				9.61377	-5.42178			9.61377	-5.14577				101.864	-15.0989			101.864	-10.0226
43	-0.00676	43	-0.00217022	43	-0.00085534		42	-0.00994	42	0.0074388	42	-0.000406541				9.80263	-5.31025			9.80263	-5.04378				103.94	-14.7925			103.94	-9.82493
44	-0.00693	44	-0.00234942	44	-0.00162		43	-0.00994	43	0.0070388	43	-0.000606541				9.99179	-5.20187			9.99179	-4.94457				106.02	-14.4948			106.02	-9.63274
45	-0.00711	45	-0.00252862	45	-0.00228		44	-0.00994	44	0.0068388	44	-0.000706542				10.1812	-5.09654			10.1812	-4.84804				108.103	-14.2056			108.103	-9.44583
46	-0.00728	46	-0.00270782	46	-0.00294		45	-0.00984	45	0.0066388	45	-0.000906542				10.371	-4.99415			10.371	-4.75411				110.189	-13.9244			110.189	-9.26404
47	-0.00725	47	-0.00268702	47	-0.0035		46	-0.00984	46	0.0065388	46	-0.00101				10.561	-4.89459			10.561	-4.66268				112.278	-13.6512			112.278	-9.08716
48	-0.00713	48	-0.00256622	48	-0.00396		47	-0.00974	47	0.0064388	47	-0.00111				10.7514	-4.79776			10.7514	-4.57367				114.371	-13.3855			114.371	-8.91503
49	-0.0069	49	-0.00234542	49	-0.00452		48	-0.00964	48	0.0063388	48	-0.00121				10.942	-4.70358			10.942	-4.487				116.467	-13.127			116.467	-8.74749
50	-0.00657	50	-0.00202462	50	-0.00498		49	-0.00954	49	0.0061388	49	-0.00131				11.1329	-4.61194			11.1329	-4.40259				118.566	-12.8756			118.566	-8.58437
51	-0.00625	51	-0.00170382	51	-0.00544		50	-0.00954	50	0.0059388	50	-0.00151				11.3241	-4.52277			11.3241	-4.32036				120.668	-12.631			120.668	-8.42553
52	-0.00592	52	-0.00138302	52	-0.006		51	-0.00944	51	0.0056388	51	-0.00151				11.5156	-4.43597			11.5156	-4.24025				122.774	-12.3929			122.774	-8.27081
53	-0.00569	53	-0.00116222	53	-0.00656		52	-0.00934	52	0.0053388	52	-0.00141				11.7074	-4.35147			11.7074	-4.16218				124.882	-12.1611			124.882	-8.12009
54	-0.00557	54	-0.00104141	54	-0.00722		53	-0.00924	53	0.0049388	53	-0.00111				11.8995	-4.26918			11.8995	-4.08609				126.994	-11.9354			126.994	-7.97321
55	-0.00544	55	-0.000920614	55	-0.00779		54	-0.00914	54	0.0044388	54	-0.000806542				12.0919	-4.18905			12.0919	-4.01192				129.11	-11.7155			129.11	-7.83007
56	-0.00541	56	-0.000899813	56	-0.00845		55	-0.00914	55	0.0038388	55	-0.000306542				12.2846	-4.11098			12.2846	-3.9396				131.228	-11.5014			131.228	-7.69052
57	-0.00539	57	-0.000879013	57	-0.00891		56	-0.00914	56	0.0032388	56	0.000193458				12.4777	-4.03492			12.4776	-3.86907				133.35	-11.2928			133.35	-7.55447
58	-0.00526	58	-0.000758212	58	-0.00917		57	-0.00914	57	0.0026388	57	0.000493458				12.6709	-3.96081			12.6709	-3.80029				135.475	-11.0894			135.475	-7.42179
59	-0.00523	59	-0.000737412	59	-0.00933		58	-0.00894	58	0.0022388	58	0.000893458				12.8645	-3.88857			12.8645	-3.73318				137.603	-10.8912			137.603	-7.29237
60	-0.0051	60	-0.000616611	60	-0.00949		59	-0.00884	59	0.0018388	59	0.00119				13.0584	-3.81814			13.0584	-3.66771				139.734	-10.698			139.734	-7.16611
61	-0.00508	61	-0.000595811	61	-0.00955		60	-0.00884	60	0.0014388	60	0.00139				13.2526	-3.74948			13.2526	-3.60382				141.869	-10.5096			141.869	-7.04291
62	-0.00505	62	-0.00057501	62	-0.00981		61	-0.00874	61	0.0010388	61	0.00159				13.4471	-3.68252			13.4471	-3.54146				144.007	-10.3258			144.007	-6.92268
63	-0.00512	63	-0.000654209	63	-0.01017		62	-0.00874	62	0.0005388	62	0.00189				13.6419	-3.6172			13.6419	-3.48058				146.149	-10.1466			146.149	-6.80532
64	-0.0051	64	-0.000633409	64	-0.01033		63	-0.00854	63	0.0001388	63	0.00219				13.837	-3.55349			13.837	-3.42115				148.293	-9.97164			148.293	-6.69074
65	-0.00507	65	-0.000612608	65	-0.01039		64	-0.00824	64	-0.0002612	64	0.00249				14.0324	-3.49132			14.0324	-3.36311				150.441	-9.80095			150.441	-6.57885
66	-0.00504	66	-0.000591808	66	-0.01035		65	-0.00804	65	-0.0005612	65	0.00269				14.2281	-3.43065			14.2281	-3.30643				152.592	-9.63435			152.592	-6.46958
67	-0.00502	67	-0.000571007	67	-0.01002		66	-0.00774	66	-0.0007612	66	0.00279				14.4242	-3.37143			14.4242	-3.25106				154.747	-9.47171			154.747	-6.36285
68	-0.00499	68	-0.000550207	68	-0.00958		67	-0.00754	67	-0.0008612	67	0.00289				14.6205	-3.31362			14.6205	-3.19696				156.905	-9.3129			156.905	-6.25858
69	-0.00496	69	-0.000529406	69	-0.00904		68	-0.00734	68	-0.0010612	68	0.00289				14.8171	-3.25718			14.8171	-3.14411				159.066	-9.15782			159.066	-6.15669
70	-0.00474	70	-0.000308606	70	-0.0087		69	-0.00724	69	-0.0010612	69	0.00289				15.014	-3.20206			15.014	-3.09246				161.23	-9.00635			161.23	-6.05711
71	-0.00461	71	-0.000187805	71	-0.00836		70	-0.00704	70	-0.0009612	70	0.00289				15.2112	-3.14823			15.2112	-3.04197				163.398	-8.85837			163.398	-5.95978
72	-0.00448	72	-6.70044e-05	72	-0.00812		71	-0.00694	71	-0.0008612	71	0.00299				15.4088	-3.09564			15.4088	-2.99262				165.569	-8.71379			165.569	-5.86463
73	-0.00436	73	5.37962e-05	73	-0.00768		72	-0.00694	72	-0.0007612	72	0.00309				15.6066	-3.04427			15.6066	-2.94437				167.744	-8.5725			167.744	-5.7716
74	-0.00403	74	0.000374597	74	-0.00724		73	-0.00694	73	-0.0006612	73	0.00329				15.8048	-2.99407			15.8047	-2.89719				169.921	-8.43441			169.921	-5.68063
75	-0.0036	75	0.000795397	75	-0.0066		74	-0.00704	74	-0.0005612	74	0.00349				16.0032	-2.94501			16.0032	-2.85105				172.103	-8.29942			172.103	-5.59165
76	-0.00318	76	0.0012162	76	-0.00586		75	-0.00704	75	-0.0004612	75	0.00369				16.202	-2.89705			16.202	-2.80591				174.287	-8.16744			174.287	-5.50461
77	-0.00285	77	0.001537	77	-0.00522		76	-0.00704	76	-0.0002612	76	0.00399				16.401	-2.85017			16.401	-2.76176				176.475	-8.03839			176.475	-5.41946
78	-0.00252	78	0.0018578	78	-0.00458		77	-0.00704	77	-6.11997e-05	77	0.00409				16.6004	-2.80434			16.6004	-2.71857				178.666	-7.91218			178.666	-5.33614
79	-0.0024	79	0.0019786	79	-0.00395		78	-0.00724	78	0.0001388	78	0.00399				16.8001	-2.75952			16.8001	-2.6763				180.861	-7.78873			180.861	-5.2546
80	-0.00227	80	0.0020994	80	-0.00321		79	-0.00764	79	0.0004388	79	0.00379				17.0001	-2.71568			17.0001	-2.63494				183.059	-7.66795			183.059	-5.17479
81	-0.00214	81	0.0022202	81	-0.00247		80	-0.00804	80	0.0006388	80	0.00349				17.2004	-2.67281			17.2004	-2.59445				185.26	-7.54979			185.26	-5.09667
82	-0.00201	82	0.002341	82	-0.00163		81	-0.00854	81	0.0007388	81	0.00329				17.401	-2.63086			17.401	-2.55482				187.465	-7.43415			187.465	-5.02019
83	-0.00179	83	0.0025618	83	-0.000688997		82	-0.00884	82	0.0008388	82	0.00329				17.6019	-2.58982			17.6019	-2.51602				189.673	-7.32098			189.673	-4.9453
84	-0.00166	84	0.0026826	84	0.000250162		83	-0.00914	83	0.0009388	83	0.00339				17.8031	-2.54967			17.8031	-2.47803				191.884	-7.21021			191.884	-4.87196
85	-0.00153	85	0.0028034	85	0.00129		84	-0.00924	84	0.0011388	84	0.00359				18.0047	-2.51036			18.0047	-2.44082				194.099	-7.10176			194.099	-4.80013
86	-0.00141	86	0.0029242	86	0.00233		85	-0.00934	85	0.0014388	85	0.00369				18.2065	-2.47189			18.2065	-2.40438				196.317	-6.99558			196.317	-4.72976
87	-0.00138	87	0.002945	87	0.00317		86	-0.00934	86	0.0017388	86	0.00379				18.4087	-2.43423			18.4087	-2.36869				198.539	-6.8916			198.539	-4.66083
88	-0.00145	88	0.0028658	88	0.00401		87	-0.00924	87	0.0022388	87	0.00389				18.6112	-2.39736			18.6112	-2.33373				200.764	-6.78977			200.764	-4.59329
89	-0.00163	89	0.00268661	89	0.00475		88	-0.00924	88	0.0026388	88	0.00399				18.814	-2.36126			18.814	-2.29947				202.993	-6.69002			202.993	-4.52711
90	-0.002	90	0.00230741	90	0.00539		89	-0.00924	89	0.0028388	89	0.00409				19.0171	-2.3259			19.0171	-2.2659				205.225	-6.59231			205.225	-4.46225
91	-0.00227	91	0.00202821	91	0.00602		90	-0.00924	90	0.0030388	90	0.00429				19.2205	-2.29127			19.2205	-2.233				207.46	-6.49657			207.46	-4.39867
92	-0.00235	92	0.00194901	92	0.00656		91	-0.00904	91	0.0032388	91	0.00449				19.4243	-2.25735			19.4243	-2.20076				209.699	-6.40276			209.699	-4.33635
93	-0.00232	93	0.00196981	93	0.0072		92	-0.00884	92	0.0035388	92	0.00479				19.6283	-2.22412			19.6283	-2.16916				211.941	-6.31083			211.941	-4.27525
94	-0.00219	94	0.00209061	94	0.00784		93	-0.00864	93	0.0039388	93	0.00519				19.8327	-2.19155			19.8327	-2.13818				214.187	-6.22072			214.187	-4.21533
95	-0.00217	95	0.00211141	95	0.00838		94	-0.00834	94	0.0043388	94	0.00569				20.0374	-2.15965			20.0374	-2.1078				216.436	-6.1324			216.436	-4.15658
96	-0.00224	96	0.00203221	96	0.00872		95	-0.00804	95	0.0048388	95	0.00629				20.2424	-2.12838			20.2424	-2.07802				218.688	-6.04581			218.688	-4.09896
97	-0.00241	97	0.00185301	97	0.00886		96	-0.00784	96	0.0053388	96	0.00679				20.4477	-2.09773			20.4477	-2.04881				220.944	-5.96091			220.944	-4.04245
98	-0.00249	98	0.00177381	98	0.0089		97	-0.00774	97	0.0058388	97	0.00709				20.6533	-2.06768			20.6533	-2.02016				223.204	-5.87766			223.204	-3.98701
99	-0.00256	99	0.00169461	99	0.00894		98	-0.00764	98	0.0063388	98	0.00709				20.8593	-2.03823			20.8593	-1.99206				225.467	-5.79602			225.467	-3.93262
100	-0.00253	100	0.00171541	100	0.00888		99	-0.00744	99	0.0068388	99	0.00699				21.0656	-2.00935			21.0656	-1.9645				227.733	-5.71594			227.733	-3.87925
101	-0.00251	101	0.00173621	101	0.00872		100	-0.00744	100	0.0075388	100	0.00689				21.2722	-1.98103			21.2722	-1.93745				230.003	-5.63739			230.003	-3.82688
102	-0.00248	102	0.00175701	102	0.00856		101	-0.00734	101	0.0081388	101	0.00689				21.4791	-1.95326			21.4791	-1.91092				232.277	-5.56033			232.277	-3.77549
103	-0.00245	103	0.00177781	103	0.00829		102	-0.00724	102	0.0088388	102	0.00689				21.6863	-1.92602			21.6863	-1.88488				234.554	-5.48473			234.554	-3.72505
104	-0.00252	104	0.00169861	104	0.00803		103	-0.00724	103	0.0095388	103	0.00689				21.8939	-1.8993			21.8939	-1.85933				236.834	-5.41054			236.834	-3.67553
105	-0.0026	105	0.00161941	105	0.00777		104	-0.00724	104	0.0104388	104	0.00679				22.1018	-1.87309			22.1018	-1.83425				239.118	-5.33774			239.118	-3.62692
106	-0.00277	106	0.00144022	106	0.00771		105	-0.00724	105	0.0113388	105	0.00669				22.31	-1.84738			22.31	-1.80963				241.405	-5.26628			241.405	-3.5792
107	-0.00294	107	0.00126102	107	0.00765		106	-0.00724	106	0.0121388	106	0.00639				22.5185	-1.82214			22.5185	-1.78547				243.696	-5.19615			243.696	-3.53234
108	-0.00312	108	0.00108182	108	0.00759		107	-0.00724	107	0.0129388	107	0.00619				22.7273	-1.79738			22.7273	-1.76174				245.991	-5.1273			245.991	-3.48633
109	-0.00329	109	0.000902617	109	0.00743		108	-0.00724	108	0.0137388	108	0.00589				22.9365	-1.77308			22.9365	-1.73845				248.289	-5.0597			248.289	-3.44113
110	-0.00346	110	0.000723417	110	0.00717		109	-0.00724	109	0.0143388	109	0.00549				23.146	-1.74923			23.146	-1.71557				250.59	-4.99334			250.59	-3.39675
111	-0.00354	111	0.000644218	111	0.00701		110	-0.00704	110	0.0148388	110	0.00499				23.3558	-1.72582			23.3558	-1.69311				252.895	-4.92817			252.895	-3.35315
112	-0.00361	112	0.000565018	112	0.00675		111	-0.00684	111	0.0152388	111	0.00459				23.566	-1.70283			23.5659	-1.67105				255.204	-4.86417			255.204	-3.31032
113	-0.00368	113	0.000485819	113	0.00649		112	-0.00664	112	0.0156388	112	0.00429				23.7764	-1.68026			23.7764	-1.64937				257.516	-4.80131			257.516	-3.26824
114	-0.00366	114	0.00050662	114	0.00632		113	-0.00644	113	0.0160388	113	0.00419				23.9872	-1.6581			23.9872	-1.62809				259.832	-4.73957			259.832	-3.22689
115	-0.00373	115	0.00042742	115	0.00616		114	-0.00634	114	0.0164388	114	0.00429				24.1983	-1.63634			24.1983	-1.60717				262.151	-4.67892			262.151	-3.18626
116	-0.0038	116	0.000348221	116	0.006		115	-0.00614	115	0.0168388	115	0.00429				24.4098	-1.61497			24.4098	-1.58663				264.474	-4.61933			264.474	-3.14633
117	-0.00378	117	0.000369021	117	0.00574		116	-0.00594	116	0.0172388	116	0.00419				24.6215	-1.59398			24.6216	-1.56644				266.8	-4.56079			266.8	-3.10709
118	-0.00375	118	0.000389822	118	0.00548		117	-0.00584	117	0.0176388	117	0.00409				24.8336	-1.57337			24.8337	-1.5466				269.13	-4.50326			269.13	-3.06852
119	-0.00362	119	0.000510622	119	0.00522		118	-0.00564	118	0.0178388	118	0.00409				25.0461	-1.55311			25.0461	-1.5271				271.464	-4.44673			271.464	-3.03061
120	-0.0035	120	0.000631423	120	0.00476		119	-0.00534	119	0.0178388	119	0.00409				25.2588	-1.53321			25.2588	-1.50793				273.801	-4.39117			273.801	-2.99333
121	-0.00347	121	0.000652224	121	0.0043		120	-0.00494	120	0.0177388	120	0.00419				25.4719	-1.51366			25.4719	-1.4891				276.142	-4.33657			276.142	-2.95669
122	-0.00344	122	0.000673024	122	0.00374		121	-0.00454	121	0.0175388	121	0.00439				25.6853	-1.49445			25.6854	-1.47058				278.486	-4.28289			278.486	-2.92065
123	-0.00332	123	0.000793825	123	0.00328		122	-0.00414	122	0.0174388	122	0.00449				25.8991	-1.47557			25.8991	-1.45238				280.834	-4.23012			280.834	-2.88522
124	-0.00309	124	0.00101463	124	0.00302		123	-0.00394	123	0.0172388	123	0.00469				26.1132	-1.45702			26.1132	-1.43448				283.185	-4.17825			283.185	-2.85038
125	-0.00296	125	0.00113543	125	0.00276		124	-0.00384	124	0.0170388	124	0.00489				26.3276	-1.43878			26.3276	-1.41688				285.54	-4.12724			285.54	-2.81611
126	-0.00283	126	0.00125623	126	0.00269		125	-0.00384	125	0.0170388	125	0.00509				26.5423	-1.42085			26.5423	-1.39958				287.899	-4.07708			287.899	-2.7824
127	-0.00271	127	0.00137703	127	0.00253		126	-0.00384	126	0.0172388	126	0.00549				26.7574	-1.40323			26.7574	-1.38256				290.262	-4.02776			290.262	-2.74925
128	-0.00268	128	0.00139783	128	0.00237		127	-0.00374	127	0.0173388	127	0.00579				26.9728	-1.38591			26.9728	-1.36582				292.628	-3.97926			292.628	-2.71663
129	-0.00255	129	0.00151863	129	0.00221		128	-0.00364	128	0.0175388	128	0.00599				27.1886	-1.36887			27.1886	-1.34936				294.997	-3.93155			294.997	-2.68454
130	-0.00253	130	0.00153943	130	0.00205		129	-0.00354	129	0.0174388	129	0.00609				27.4047	-1.35212			27.4046	-1.33317				297.37	-3.88462			297.37	-2.65297
131	-0.0024	131	0.00166023	131	0.00199		130	-0.00344	130	0.0172388	130	0.00609				27.6211	-1.33565			27.6211	-1.31724				299.747	-3.83846			299.747	-2.6219
132	-0.00217	132	0.00188103	132	0.00203		131	-0.00344	131	0.0169388	131	0.00619				27.8378	-1.31945			27.8378	-1.30157				302.128	-3.79305			302.128	-2.59133
133	-0.00185	133	0.00187239	133	0.00217		132	-0.00344	132	0.0166388	132	0.00639				28.0549	-1.30352			28.0549	-1.28615				304.512	-3.74837			304.512	-2.56125
134	-0.00132	134	0.00189352	134	0.00231		133	-0.00344	133	0.0164388	133	0.00669				28.2723	-1.28785			28.2723	-1.27098				306.9	-3.7044			306.9	-2.53164
135	-0.00089332	135	0.00181465	135	0.00255		134	-0.00354	134	0.0162388	134	0.00709				28.4901	-1.27243			28.4901	-1.25605				309.292	-3.66114			309.292	-2.5025
136	-0.000366501	136	0.00183578	136	0.00299		135	-0.00374	135	0.0160388	135	0.00739				28.7081	-1.25727			28.7082	-1.24136				311.687	-3.61857			311.687	-2.47381
137	-3.96819e-05	137	0.00165691	137	0.00343		136	-0.00384	136	0.0158388	136	0.00759				28.9266	-1.24235			28.9266	-1.2269				314.086	-3.57667			314.086	-2.44557
138	0.000187137	138	0.00137804	138	0.00396		137	-0.00404	137	0.0155388	137	0.00769				29.1454	-1.22767			29.1454	-1.21267				316.488	-3.53544			316.488	-2.41777
139	0.000413956	139	0.00109918	139	0.0045		138	-0.00404	138	0.0150388	138	0.00789				29.3645	-1.21322			29.3645	-1.19867				318.895	-3.49485			318.895	-2.3904
140	0.000740775	140	0.000920306	140	0.00514		139	-0.00414	139	0.0146388	139	0.00809				29.5839	-1.19901			29.5839	-1.18488				321.305	-3.45489			321.305	-2.36345
141	0.00127	141	0.000941436	141	0.00588		140	-0.00414	140	0.0141388	140	0.00829				29.8037	-1.18502			29.8037	-1.1713				323.718	-3.41555			323.718	-2.33691
142	0.00179	142	0.000962567	142	0.00662		141	-0.00434	141	0.0135388	141	0.00829				30.0238	-1.17125			30.0238	-1.15794				326.136	-3.37683			326.136	-2.31078
143	0.00252	143	0.0011837	143	0.00756		142	-0.00454	142	0.0127388	142	0.00839				30.2443	-1.1577			30.2443	-1.14478				328.557	-3.3387			328.557	-2.28505
144	0.00315	144	0.00130483	144	0.0085		143	-0.00484	143	0.0118388	143	0.00849				30.4651	-1.14436			30.4651	-1.13183				330.982	-3.30115			330.982	-2.2597
145	0.00377	145	0.00142596	145	0.00974		144	-0.00504	144	0.0108388	144	0.00869				30.6862	-1.13123			30.6862	-1.11907				333.41	-3.26418			333.41	-2.23473
146	0.0043	146	0.00144709	146	0.01098		145	-0.00524	145	0.0098388	145	0.00879				30.9077	-1.1183			30.9077	-1.10651				335.842	-3.22777			335.842	-2.21014
147	0.00473	147	0.00136822	147	0.01232		146	-0.00544	146	0.0089388	146	0.00859				31.1296	-1.10558			31.1296	-1.09413				338.278	-3.19191			338.278	-2.18591
148	0.00496	148	0.00108935	148	0.01376		147	-0.00554	147	0.0079388	147	0.00819				31.3517	-1.09304			31.3518	-1.08195				340.718	-3.1566			340.718	-2.16205
149	0.00528	149	0.00091048	149	0.0152		148	-0.00564	148	0.0070388	148	0.00759				31.5743	-1.0807			31.5743	-1.06994				343.162	-3.12181			343.162	-2.13854
150	0.00551	150	0.000631611	150	0.01663		149	-0.00584	149	0.0061388	149	0.00699				31.7971	-1.06855			31.7971	-1.05812				345.609	-3.08754			345.609	-2.11537
151	0.00594	151	0.000552741	151	0.01797		150	-0.00614	150	0.0053388	150	0.00659				32.0204	-1.05659			32.0204	-1.04647				348.06	-3.05378			348.06	-2.09254
152	0.00626	152	0.000373872	152	0.01921		151	-0.00644	151	0.0044388	151	0.00649				32.2439	-1.0448			32.2439	-1.03499				350.515	-3.02052			350.515	-2.07005
153	0.00649	153	9.50021e-05	153	0.02035		152	-0.00674	152	0.0035388	152	0.00639				32.4678	-1.03319			32.4678	-1.02369				352.973	-2.98775			352.973	-2.04788
154	0.00662	154	-0.000283867	154	0.02149		153	-0.00704	153	0.0026388	153	0.00649				32.6921	-1.02176			32.6921	-1.01255				355.436	-2.95547			355.436	-2.02603
155	0.00654	155	-0.000862737	155	0.02263		154	-0.00714	154	0.0019388	154	0.00649				32.9167	-1.01049			32.9167	-1.00157				357.902	-2.92365			357.902	-2.0045
156	0.00647	156	-0.00144161	156	0.02377		155	-0.00724	155	0.0013388	155	0.00639				33.1416	-0.99939			33.1416	-0.990758				360.372	-2.8923			360.372	-1.98328
157	0.0063	157	-0.00212048	157	0.02471		156	-0.00714	156	0.0010388	156	0.00619				33.3669	-0.98846			33.3669	-0.980099				362.845	-2.8614			362.845	-1.96236
158	0.00622	158	-0.00269935	158	0.02555		157	-0.00684	157	0.000838801	157	0.00589				33.5926	-0.97769			33.5926	-0.969594				365.323	-2.83095			365.323	-1.94174
159	0.00635	159	-0.00307821	159	0.02619		158	-0.00664	158	0.000638801	158	0.00559				33.8186	-0.96708			33.8185	-0.959241				367.804	-2.80093			367.804	-1.92141
160	0.00668	160	-0.00325708	160	0.02673		159	-0.00654	159	0.000438801	159	0.00519				34.0449	-0.95662			34.0449	-0.949036				370.289	-2.77135			370.289	-1.90137
161	0.0071	161	-0.00333595	161	0.02697		160	-0.00654	160	0.000238801	160	0.00499				34.2716	-0.94631			34.2716	-0.938977				372.778	-2.74218			372.778	-1.88161
162	0.00753	162	-0.00341482	162	0.0271		161	-0.00664	161	3.88012e-05	161	0.00479				34.4986	-0.93616			34.4986	-0.929061				375.271	-2.71344			375.271	-1.86212
163	0.00796	163	-0.00349369	163	0.02714		162	-0.00674	162	-0.000261199	162	0.00469				34.726	-0.92614			34.726	-0.919286				377.767	-2.68509			377.767	-1.84291
164	0.00828	164	-0.00367256	164	0.02708		163	-0.00674	163	-0.000461199	163	0.00459				34.9538	-0.91628			34.9538	-0.909648				380.268	-2.65715			380.268	-1.82396
165	0.00851	165	-0.00395143	165	0.02682		164	-0.00664	164	-0.000661199	164	0.00449				35.1819	-0.90655			35.1819	-0.900147				382.772	-2.6296			382.772	-1.80528
166	0.00884	166	-0.0041303	166	0.02646		165	-0.00654	165	-0.000661199	165	0.00429				35.4103	-0.89697			35.4103	-0.890778				385.28	-2.60243			385.28	-1.78686
167	0.00916	167	-0.00430917	167	0.0261		166	-0.00654	166	-0.000561199	166	0.00389				35.6391	-0.88752			35.6391	-0.88154				387.792	-2.57564			387.792	-1.76868
168	0.00959	168	-0.00438804	168	0.02574		167	-0.00664	167	-0.000361199	167	0.00319				35.8683	-0.8782			35.8683	-0.872431				390.308	-2.54922			390.308	-1.75076
169	0.01002	169	-0.00446691	169	0.02538		168	-0.00684	168	-0.000261199	168	0.00239				36.0978	-0.86902			36.0978	-0.863448				392.828	-2.52317			392.828	-1.73308
170	0.01055	170	-0.004309	170	0.02492		169	-0.00704	169	-0.000161199	169	0.00159				36.3277	-0.85996			36.3277	-0.854588				395.351	-2.49748			395.351	-1.71564
171	0.01097	171	-0.00354759	171	0.02426		170	-0.00724	170	-0.000261199	170	0.000893457				36.5579	-0.85103			36.5579	-0.845851				397.879	-2.47213			397.879	-1.69843
172	0.0114	172	-0.00278618	172	0.0237		171	-0.00744	171	-0.000361199	171	0.000293457				36.7885	-0.84222			36.7885	-0.837233				400.41	-2.44714			400.41	-1.68146
173	0.01163	173	-0.00222477	173	0.02314		172	-0.00774	172	-0.000561199	172	-0.000106543				37.0194	-0.83354			37.0194	-0.828732				402.945	-2.42248			402.945	-1.66472
174	0.01175	174	-0.00176336	174	0.02267		173	-0.00814	173	-0.000661199	173	-0.000506543				37.2507	-0.82498			37.2507	-0.820347				405.484	-2.39815			405.484	-1.64819
175	0.01168	175	-0.00150195	175	0.02231		174	-0.00844	174	-0.000661199	174	-0.000906543				37.4824	-0.81653			37.4824	-0.812075				408.027	-2.37416			408.027	-1.63189
176	0.01151	176	-0.00134054	176	0.02205		175	-0.00864	175	-0.000561199	175	-0.00131				37.7144	-0.8082			37.7144	-0.803915				410.574	-2.35048			410.574	-1.61581
177	0.01133	177	-0.00117913	177	0.02179		176	-0.00874	176	-0.000561199	176	-0.00161				37.9468	-0.79999			37.9468	-0.795864				413.125	-2.32713			413.125	-1.59993
178	0.01106	178	-0.00111772	178	0.02163		177	-0.00894	177	-0.000561199	177	-0.00181				38.1795	-0.79188			38.1795	-0.787921				415.68	-2.30408			415.679	-1.58427
179	0.01089	179	-0.000956311	179	0.02157		178	-0.00904	178	-0.000561199	178	-0.00191				38.4126	-0.78389			38.4126	-0.780084				418.238	-2.28134			418.238	-1.56881
180	0.01061	180	-0.000894901	180	0.02151		179	-0.00914	179	-0.000761199	179	-0.00201				38.6461	-0.776			38.6461	-0.772351				420.801	-2.2589			420.801	-1.55355
181	0.01034	181	-0.000833492	181	0.02145		180	-0.00924	180	-0.000861199	180	-0.00201				38.8799	-0.76822			38.8799	-0.76472				423.367	-2.23676			423.367	-1.53849
182	0.01017	182	-0.000672082	182	0.02129		181	-0.00924	181	-0.0010612	181	-0.00181													425.938	-2.2149			425.938	-1.52363
183	0.00999	183	-0.000510673	183	0.02113		182	-0.00904	182	-0.0011612	182	-0.00151													428.512	-2.19334			428.512	-1.50896
184	0.00992	184	-0.000249263	184	0.02097		183	-0.00874	183	-0.0013612	183	-0.00121													431.09	-2.17205			431.09	-1.49447
185	0.00985	185	1.21463e-05	185	0.02071		184	-0.00844	184	-0.0014612	184	-0.00101													433.673	-2.15104			433.673	-1.48018
186	0.00967	186	0.000173556	186	0.02054		185	-0.00824	185	-0.0015612	185	-0.000906543
187	0.0095	187	0.000334965	187	0.02048		186	-0.00824	186	-0.0016612	186	-0.000706543
188	0.00933	188	0.000496375	188	0.02042		187	-0.00834	187	-0.0015612	187	-0.000506543
189	0.00895	189	0.000457784	189	0.02036		188	-0.00854	188	-0.0014612	188	-0.000206543
190	0.00858	190	0.000419194	190	0.0203		189	-0.00854	189	-0.0012612	189	0.000293457
191	0.00831	191	0.000480604	191	0.02014		190	-0.00844	190	-0.0010612	190	0.000793457
192	0.00804	192	0.000542013	192	0.01988		191	-0.00814	191	-0.000961199	191	0.00139
193	0.00786	193	0.000703423	193	0.01972		192	-0.00784	192	-0.000761199	192	0.00189
194	0.00769	194	0.000864832	194	0.01966		193	-0.00764	193	-0.000461198	193	0.00229
195	0.00742	195	0.000926242	195	0.0198		194	-0.00754	194	-0.000161198	194	0.00259
196	0.00714	196	0.000987651	196	0.02004		195	-0.00764	195	0.000238802	195	0.00279
197	0.00697	197	0.00114906	197	0.02048		196	-0.00774	196	0.000638802	196	0.00309
198	0.0068	198	0.00131047	198	0.02081		197	-0.00794	197	0.0012388	197	0.00339
199	0.00662	199	0.00147188	199	0.02125		198	-0.00814	198	0.0019388	198	0.00369
200	0.00645	200	0.00163329	200	0.02179		199	-0.00834	199	0.0027388	199	0.00399
201	0.00648	201	0.0019947	201	0.02223		200	-0.00854	200	0.0034388	200	0.00429
202	0.0065	202	0.00235611	202	0.02267		201	-0.00864	201	0.0040388	201	0.00449
203	0.00653	203	0.00271752	203	0.02311		202	-0.00864	202	0.0045388	202	0.00469
204	0.00656	204	0.00307893	204	0.02355		203	-0.00854	203	0.0050388	203	0.00489
205	0.00648	205	0.00334034	205	0.02389		204	-0.00854	204	0.0056388	204	0.00489
206	0.00631	206	0.00350175	206	0.02423		205	-0.00864	205	0.0063388	205	0.00489
207	0.00604	207	0.00356316	207	0.02457		206	-0.00884	206	0.0070388	206	0.00479
208	0.00586	208	0.00372457	208	0.02491		207	-0.00904	207	0.0077388	207	0.00479
209	0.00559	209	0.00378598	209	0.02504		208	-0.00914	208	0.0083388	208	0.00469
210	0.00542	210	0.00394738	210	0.02518		209	-0.00924	209	0.0089388	209	0.00469
211	0.00544	211	0.00430879	211	0.02502		210	-0.00914	210	0.0095388	210	0.00449
212	0.00537	212	0.0045702	212	0.02486		211	-0.00904	211	0.0099388	211	0.00419
213	0.0051	213	0.00463161	213	0.0246		212	-0.00884	212	0.0103388	212	0.00379
214	0.00483	214	0.00469302	214	0.02454		213	-0.00864	213	0.0106388	213	0.00349
215	0.00425	215	0.00445443	215	0.02458		214	-0.00824	214	0.0108388	214	0.00319
216	0.00368	216	0.00421584	216	0.02462		215	-0.00784	215	0.0111388	215	0.00309
217	0.00321	217	0.00407725	217	0.02466		216	-0.00754	216	0.0113388	216	0.00299
218	0.00273	218	0.00393866	218	0.0245		217	-0.00734	217	0.0116388	217	0.00299
219	0.00246	219	0.00400007	219	0.02434		218	-0.00734	218	0.0117388	218	0.00289
220	0.00209	220	0.00396148	220	0.02428		219	-0.00744	219	0.0118388	219	0.00269
221	0.00181	221	0.00402289	221	0.02431		220	-0.00754	220	0.0119388	220	0.00239
222	0.00154	222	0.0040843	222	0.02445		221	-0.00754	221	0.0121388	221	0.00189
223	0.00127	223	0.00414571	223	0.02449		222	-0.00754	222	0.0123388	222	0.00139
224	0.000793569	224	0.00400712	224	0.02463		223	-0.00754	223	0.0125388	223	0.000893457
225	0.000320388	225	0.00386853	225	0.02477		224	-0.00764	224	0.0128388	224	0.000593457
226	-0.000352794	226	0.00352994	226	0.02501		225	-0.00754	225	0.0130388	225	0.000593457
227	-0.00113	227	0.00309135	227	0.02535		226	-0.00744	226	0.0133388	226	0.000593457
228	-0.0018	228	0.00275276	228	0.02559		227	-0.00744	227	0.0135388	227	0.000593457
229	-0.00257	229	0.00231417	229	0.02583		228	-0.00754	228	0.0138388	228	0.000593457
230	-0.00345	230	0.00177558	230	0.02577		229	-0.00774	229	0.0139388	229	0.000593457
231	-0.00432	231	0.00123698	231	0.02561		230	-0.00804	230	0.0140388	230	0.000393457
232	-0.00529	232	0.000598394	232	0.02525		231	-0.00824	231	0.0140388	231	0.000193457
233	-0.00617	233	5.98039e-05	233	0.02478		232	-0.00844	232	0.0139388	232	-0.000106543
234	-0.00694	234	-0.000378787	234	0.02412		233	-0.00844	233	0.0136388	233	-0.000406543
235	-0.00761	235	-0.000717377	235	0.02336		234	-0.00834	234	0.0132388	234	-0.000506543
236	-0.00828	236	-0.00105597	236	0.0226		235	-0.00824	235	0.0127388	235	-0.000506543
237	-0.00896	237	-0.00139456	237	0.02184		236	-0.00814	236	0.0120388	236	-0.000406543
238	-0.00953	238	-0.00163315	238	0.02118		237	-0.00804	237	0.0113388	237	-0.000106543
239	-0.01	239	-0.00177174	239	0.02032		238	-0.00804	238	0.0106388	238	9.34566e-05
240	-0.01038	240	-0.00181033	240	0.01936		239	-0.00804	239	0.0101388	239	0.000193457
241	-0.01065	241	-0.00174892	241	0.0181		240	-0.00794	240	0.0096388	240	9.34566e-05
242	-0.01062	242	-0.00138751	242	0.01664		241	-0.00784	241	0.0090388	241	-0.000106543
243	-0.0104	243	-0.00118663	243	0.01508		242	-0.00774	242	0.0082388	242	-0.000206543
244	-0.01007	244	-0.00148561	244	0.01352		243	-0.00754	243	0.0075388	243	-0.000206543
245	-0.00954	245	-0.00158459	245	0.01205		244	-0.00724	244	0.0068388	244	-0.000106543
246	-0.00892	246	-0.00158357	246	0.01069		245	-0.00684	245	0.0062388	245	9.34565e-05
247	-0.00819	247	-0.00148254	247	0.00943		246	-0.00624	246	0.0056388	246	0.000293457
248	-0.00736	248	-0.00128152	248	0.00847		247	-0.00574	247	0.0051388	247	0.000393457
249	-0.00674	249	-0.0012805	249	0.00771		248	-0.00524	248	0.0047388	248	0.000393457
250	-0.00591	250	-0.00107947	250	0.00715		249	-0.00474	249	0.0044388	249	0.000393456
251	-0.00498	251	-0.000778451	251	0.00639		250	-0.00424	250	0.0042388	250	0.000293456
252	-0.00406	252	-0.000477428	252	0.00543		251	-0.00374	251	0.0041388	251	9.34565e-05
253	-0.00303	253	-7.64055e-05	253	0.00437		252	-0.00324	252	0.0039388	252	-0.000206544
254	-0.002	254	0.000324617	254	0.00351		253	-0.00274	253	0.0037388	253	-0.000406544
255	-0.00108	255	0.00062564	255	0.00305		254	-0.00224	254	0.0033388	254	-0.000606544
256	-0.000348224	256	0.000726663	256	0.00299		255	-0.00204	255	0.0028388	255	-0.000706544
257	0.000178595	257	0.000627686	257	0.00322		256	-0.00184	256	0.0024388	256	-0.000806544
258	0.000605414	258	0.000428709	258	0.00366		257	-0.00174	257	0.0021388	257	-0.000906544
259	0.000932233	259	0.000129731	259	0.0041		258	-0.00164	258	0.0019388	258	-0.00111
260	0.00126	260	-0.000169246	260	0.00454		259	-0.00164	259	0.0017388	259	-0.00141
261	0.00179	261	-0.000268223	261	0.00498		260	-0.00164	260	0.0015388	260	-0.00161
262	0.00231	262	-0.0003672	262	0.00552		261	-0.00194	261	0.0012388	261	-0.00171
263	0.00274	263	-0.000566177	263	0.00606		262	-0.00224	262	0.000738802	262	-0.00171
264	0.00307	264	-0.000865155	264	0.0066		263	-0.00244	263	0.000238802	263	-0.00141
265	0.00319	265	-0.00117508	265	0.00714		264	-0.00264	264	-0.000261198	264	-0.00111
266	0.00312	266	-0.00128073	266	0.00768		265	-0.00284	265	-0.000761198	265	-0.000606544
267	0.00305	267	-0.00138637	267	0.00832		266	-0.00304	266	-0.0011612	266	-0.000206544
268	0.00307	268	-0.00139202	268	0.00896		267	-0.00324	267	-0.0015612	267	0.000293456
269	0.0032	269	-0.00129766	269	0.00949		268	-0.00354	268	-0.0019612	268	0.000693456
270	0.00343	270	-0.00110331	270	0.00983		269	-0.00384	269	-0.0022612	269	0.00109
271	0.00375	271	-0.000808954	271	0.00997		270	-0.00394	270	-0.0024612	270	0.00139
272	0.00418	272	-0.000414599	272	0.00991		271	-0.00404	271	-0.0028612	271	0.00159
273	0.00461	273	-2.02446e-05	273	0.00965		272	-0.00404	272	-0.0032612	272	0.00169
274	0.00503	274	0.00037411	274	0.00939		273	-0.00404	273	-0.0036612	273	0.00179
275	0.00536	275	0.000668465	275	0.00923		274	-0.00404	274	-0.0039612	274	0.00199
276	0.00549	276	0.00076282	276	0.00897		275	-0.00404	275	-0.0041612	275	0.00219
277	0.00561	277	0.000857175	277	0.00871		276	-0.00394	276	-0.0041612	276	0.00219
278	0.00574	278	0.000951529	278	0.00825		277	-0.00374	277	-0.0040612	277	0.00209
279	0.00577	279	0.000945884	279	0.00779		278	-0.00344	278	-0.0039612	278	0.00179
280	0.0059	280	0.00104024	280	0.00723		279	-0.00314	279	-0.0038612	279	0.00139
281	0.00592	281	0.00103459	281	0.00656		280	-0.00294	280	-0.0038612	280	0.000993456
282	0.00585	282	0.000928949	282	0.0059		281	-0.00274	281	-0.0037612	281	0.000593456
283	0.00568	283	0.000723303	283	0.00514		282	-0.00254	282	-0.0036612	282	0.000293456
284	0.0056	284	0.000617658	284	0.00428		283	-0.00224	283	-0.0035612	283	-6.54384e-06
285	0.00543	285	0.000412013	285	0.00352		284	-0.00184	284	-0.0033612	284	-0.000106544
286	0.00506	286	6.36776e-06	286	0.00286		285	-0.00144	285	-0.0033612	285	-0.000206544
287	0.00468	287	-0.000399277	287	0.0022		286	-0.00104	286	-0.0032612	286	-6.54387e-06
288	0.00411	288	-0.00100492	288	0.00144		287	-0.000637112	287	-0.0031612	287	9.34561e-05
289	0.00354	289	-0.00161057	289	0.00067767		288	-0.000237112	288	-0.0029612	288	0.000193456
290	0.00286	290	-0.00231621	290	-0.000183172		289	0.000162888	289	-0.0028612	289	0.000293456
291	0.00219	291	-0.00302186	291	-0.000944013		290	0.000662888	290	-0.0028612	290	0.000293456
292	0.00172	292	-0.0035275	292	-0.0016		291	0.00116	291	-0.0028612	291	0.000293456
293	0.00124	293	-0.00403315	293	-0.00207		292	0.00146	292	-0.0028612	292	0.000393456
294	0.000970896	294	-0.00433879	294	-0.00243		293	0.00166	293	-0.0027612	293	0.000493456
295	0.000897715	295	-0.00444444	295	-0.00269		294	0.00176	294	-0.0026612	294	0.000793456
296	0.000824534	296	-0.00455008	296	-0.00295		295	0.00206	295	-0.0025612	295	0.000993456
297	0.000851353	297	-0.00455573	297	-0.00311		296	0.00236	296	-0.0025612	296	0.00129
298	0.000678172	298	-0.00476137	298	-0.00317		297	0.00266	297	-0.0026612	297	0.00139
299	0.000304991	299	-0.00516702	299	-0.00313		298	0.00296	298	-0.0028612	298	0.00129
300	-0.00016819	300	-0.00567267	300	-0.00299		299	0.00296	299	-0.0030612	299	0.00119
301	-0.000441371	301	-0.00597831	301	-0.00275		300	0.00286	300	-0.0030612	300	0.000993456
302	-0.000514552	302	-0.00608396	302	-0.00241		301	0.00266	301	-0.0029612	301	0.000793456
303	-0.000487733	303	-0.0060896	303	-0.00197		302	0.00246	302	-0.0028612	302	0.000693456
304	-0.000360914	304	-0.00599525	304	-0.00153		303	0.00216	303	-0.0027612	303	0.000493456
305	-0.000234095	305	-0.00590089	305	-0.0012		304	0.00186	304	-0.0027612	304	0.000393456
306	-0.000107276	306	-0.00580654	306	-0.000856634		305	0.00146	305	-0.0027612	305	0.000293456
307	-8.04569e-05	307	-0.00581218	307	-0.000617476		306	0.00116	306	-0.0025612	306	9.34559e-05
308	-5.36379e-05	308	-0.00581783	308	-0.000378317		307	0.000862888	307	-0.0023612	307	-0.000106544
309	-2.6819e-05	309	-0.00582347	309	-0.000139159		308	0.000662888	308	-0.0020612	308	-0.000406544
310	0	310	-0.00582912	310	0		309	0.000362888	309	-0.0016612	309	-0.000706544
311	5.5e-05	311	-0.00582831	311	0.000145833		310	0.000424306	310	-0.000961197	310	-0.000810209
312	0.00031	312	-0.00548872	312	0.000291667		311	0.00236	311	0.00132172	311	0.000287959
313	0.000865	313	-0.00484914	313	0.0005375		312	0.00889	312	0.00791317	312	0.00429
314	0.00192	314	-0.00370955	314	0.000983333		313	0.02222	313	0.0212046	313	0.01258
315	0.00367	315	-0.00186997	315	0.00153		314	0.04325	314	0.0421961	314	0.02548
316	0.00603	316	0.000569617	316	0.00228		315	0.07108	315	0.0700875	315	0.04198
317	0.00888	317	0.0035092	317	0.00322		316	0.10361	316	0.102679	316	0.06068
318	0.01224	318	0.00694879	318	0.00447		317	0.13874	317	0.13797	317	0.08038
319	0.01579	319	0.0105884	319	0.00601		318	0.17497	318	0.174462	318	0.10038
320	0.01955	320	0.014428	320	0.00786		319	0.2113	319	0.211353	319	0.12017
321	0.0234	321	0.0183675	321	0.0099		320	0.24753	320	0.248245	320	0.13977
322	0.02726	322	0.0223071	322	0.01215		321	0.28336	321	0.284836	321	0.15897
323	0.03111	323	0.0262467	323	0.0146		322	0.31849	322	0.320728	322	0.17757
324	0.03497	324	0.0301863	324	0.01714		323	0.35242	323	0.355519	323	0.19547
325	0.03882	325	0.0341259	325	0.01979		324	0.38455	324	0.388811	324	0.21206
326	0.04248	326	0.0378655	326	0.02243		325	0.41428	325	0.420002	325	0.22706
327	0.04593	327	0.0414051	327	0.02498		326	0.43982	326	0.447394	326	0.23956
328	0.04899	328	0.0445446	328	0.02733		327	0.45855	327	0.468585	327	0.24796
329	0.05154	329	0.0471842	329	0.02957		328	0.46858	328	0.481076	328	0.25086
330	0.0533	330	0.0490238	330	0.03142		329	0.46911	329	0.484068	329	0.24805
331	0.05415	331	0.0499634	331	0.03296		330	0.46124	330	0.478359	330	0.24055
332	0.05431	332	0.050203	332	0.03411		331	0.44697	331	0.466051	331	0.22965
333	0.05376	333	0.0497426	333	0.03515		332	0.4286	332	0.449442	332	0.21695
334	0.05272	334	0.0487821	334	0.0359		333	0.40763	333	0.430134	333	0.20335
335	0.05137	335	0.0475217	335	0.03645		334	0.38486	334	0.409125	334	0.18915
336	0.04983	336	0.0460613	336	0.03679		335	0.36099	335	0.386617	335	0.17474
337	0.04798	337	0.0443009	337	0.03674		336	0.33622	336	0.363308	336	0.15994
338	0.04594	338	0.0423405	338	0.03648		337	0.31115	337	0.3394	337	0.14524
339	0.04359	339	0.0400801	339	0.03593		338	0.28628	338	0.315391	338	0.13094
340	0.04115	340	0.0377197	340	0.03518		339	0.26231	339	0.291983	339	0.11724
341	0.0386	341	0.0352592	341	0.03432		340	0.23965	340	0.269474	340	0.10453
342	0.03606	342	0.0327988	342	0.03327		341	0.21828	341	0.248265	341	0.09293
343	0.03351	343	0.0303384	343	0.03231		342	0.19841	342	0.228557	342	0.08233
344	0.03097	344	0.027878	344	0.03126		343	0.17984	343	0.210248	343	0.07273
345	0.02842	345	0.0254176	345	0.0303		344	0.16257	344	0.19334	344	0.06393
346	0.02588	346	0.0229572	346	0.02915		345	0.1465	345	0.177631	345	0.05603
347	0.02343	347	0.0205967	347	0.0279		346	0.13163	346	0.163023	346	0.04892
348	0.02109	348	0.0183363	348	0.02654		347	0.11796	347	0.149314	347	0.04262
349	0.01884	349	0.0161759	349	0.02499		348	0.10549	348	0.136606	348	0.03692
350	0.0167	350	0.0141155	350	0.02333		349	0.09402	349	0.124997	349	0.03172
351	0.01465	351	0.0121551	351	0.02168		350	0.08365	350	0.114489	350	0.02712
352	0.01271	352	0.0102947	352	0.02003		351	0.07418	351	0.10488	351	0.02291
353	0.01076	353	0.00843426	353	0.01847		352	0.06581	352	0.0960715	352	0.01921
354	0.00902	354	0.00677384	354	0.01682		353	0.05824	353	0.0881629	353	0.01591
355	0.00727	355	0.00511343	355	0.01526		354	0.05148	354	0.0810544	354	0.01311
356	0.00563	356	0.00355301	356	0.01371		355	0.04531	355	0.0745458	355	0.01081
357	0.00398	357	0.0019926	357	0.01225		356	0.03974	356	0.0685373	356	0.00871
358	0.00234	358	0.000432184	358	0.011		357	0.03477	357	0.0630287	357	0.0069
359	0.000795	359	-0.00102823	359	0.00985		358	0.0304	358	0.0578202	358	0.0053
360	-0.00055	360	-0.00228865	360	0.00879		359	0.02663	359	0.0530117	359	0.0038
361	-0.0017	361	-0.00334906	361	0.00774		360	0.02326	360	0.0488031	360	0.0024
362	-0.00254	362	-0.00410948	362	0.00688		361	0.02029	361	0.0449946	361	0.0011
363	-0.00329	363	-0.00476989	363	0.00613		362	0.01772	362	0.041586	362	-0.000105488
364	-0.00393	364	-0.00533031	364	0.00548		363	0.01535	363	0.0384775	363	-0.00121
365	-0.00468	365	-0.00599072	365	0.00482		364	0.01328	364	0.0356689	364	-0.00221
366	-0.00542	366	-0.00665114	366	0.00417		365	0.01141	365	0.0329604	365	-0.00311
367	-0.00607	367	-0.00721155	367	0.00371		366	0.00974	366	0.0304519	366	-0.00401
368	-0.00661	368	-0.00767197	368	0.00336		367	0.00827	367	0.0278433	367	-0.00481
369	-0.00726	369	-0.00823238	369	0.0032		368	0.00691	368	0.0254348	368	-0.00552
370	-0.0077	370	-0.0085928	370	0.00325		369	0.00574	369	0.0230262	369	-0.00622
371	-0.00815	371	-0.00895321	371	0.0033		370	0.00477	370	0.0207177	370	-0.00692
372	-0.00849	372	-0.00921363	372	0.00334		371	0.004	371	0.0187091	371	-0.00752
373	-0.00863	373	-0.00927404	373	0.00329		372	0.00333	372	0.0169006	372	-0.00812
374	-0.00868	374	-0.00923446	374	0.00313		373	0.00266	373	0.015292	373	-0.00853
375	-0.00873	375	-0.00919487	375	0.00298		374	0.00209	374	0.0136835	374	-0.00873
376	-0.00887	376	-0.00925529	376	0.00293		375	0.00162	375	0.012175	375	-0.00883
377	-0.00912	377	-0.0094157	377	0.00297		376	0.00105	376	0.0106664	376	-0.00873
378	-0.00936	378	-0.00957612	378	0.00322		377	0.000681808	377	0.00935788	377	-0.00863
379	-0.00931	379	-0.00943653	379	0.00356		378	0.000412517	378	0.00814933	378	-0.00843
380	-0.00915	380	-0.00919695	380	0.00401		379	0.000443226	379	0.00714079	379	-0.00824
381	-0.00899	381	-0.00895736	381	0.00455		380	0.000573935	380	0.00623225	380	-0.00814
382	-0.00874	382	-0.00861778	382	0.0051		381	0.000704644	381	0.0056237	381	-0.00784
383	-0.00848	383	-0.00827819	383	0.00565		382	0.000935353	382	0.00501516	382	-0.00734
384	-0.00833	384	-0.00803861	384	0.00609		383	0.00117	383	0.00460662	383	-0.00674
385	-0.00797	385	-0.00759902	385	0.00664		384	0.0012	384	0.00429808	384	-0.00605
386	-0.00762	386	-0.00715944	386	0.00718		385	0.00113	385	0.00408953	385	-0.00545
387	-0.00716	387	-0.00661985	387	0.00793		386	0.00116	386	0.00388099	386	-0.00485
388	-0.00671	388	-0.00608027	388	0.00867		387	0.00109	387	0.00357245	387	-0.00425
389	-0.00625	389	-0.00554068	389	0.00952		388	0.00122	388	0.0032639	388	-0.00375
390	-0.0058	390	-0.0050011	390	0.01017		389	0.00125	389	0.00295536	389	-0.00335
391	-0.00534	391	-0.00446151	391	0.01081		390	0.00128	390	0.00254682	390	-0.00306
392	-0.00499	392	-0.00402193	392	0.01146		391	0.00141	391	0.00233827	391	-0.00266
393	-0.00463	393	-0.00358234	393	0.012		392	0.00144	392	0.00222973	392	-0.00236
394	-0.00448	394	-0.00334276	394	0.01265		393	0.00147	393	0.00222119	393	-0.00196
395	-0.00442	395	-0.00320317	395	0.0133		394	0.0013	394	0.00221265	394	-0.00146
396	-0.00457	396	-0.00326359	396	0.01384		395	0.00113	395	0.0020041	395	-0.00117
397	-0.00481	397	-0.003424	397	0.01429		396	0.000965279	396	0.00169556	396	-0.000967786
398	-0.00506	398	-0.00358442	398	0.01463		397	0.000795988	397	0.00138702	397	-0.000769618
399	-0.0054	399	-0.00384483	399	0.01498		398	0.000626697	398	0.000978474	398	-0.00067145
400	-0.00575	400	-0.00410525	400	0.01512		399	0.000357406	399	0.000569931	399	-0.000673282
401	-0.00629	401	-0.00456566	401	0.01507		400	0.000188115	400	0.000161388	400	-0.000775115
402	-0.00694	402	-0.00512608	402	0.01482		401	0.000118824	401	-0.000147156	401	-0.000976947
403	-0.00758	403	-0.00568649	403	0.01436		402	0.000149533	402	-0.000455699	402	-0.00118
404	-0.00813	404	-0.00614691	404	0.01391		403	0.000380242	403	-0.000664242	403	-0.00138
405	-0.00867	405	-0.00660732	405	0.01355		404	0.000610951	404	-0.000772785	404	-0.00148
406	-0.00902	406	-0.00686774	406	0.0133		405	0.00084166	405	-0.000981328	405	-0.00148
407	-0.00916	407	-0.00692815	407	0.01285		406	0.000872369	406	-0.00108987	406	-0.00149
408	-0.00931	408	-0.00698857	408	0.01229		407	0.000803078	407	-0.00139841	407	-0.00159
409	-0.00935	409	-0.00694898	409	0.01164		408	0.000733787	408	-0.00170696	408	-0.00179
410	-0.0093	410	-0.0068094	410	0.01078		409	0.000864496	409	-0.0021155	409	-0.00209
411	-0.00914	411	-0.00656981	411	0.00993		410	0.0011	410	-0.00232404	410	-0.00229
412	-0.00859	412	-0.00593023	412	0.00917		411	0.00133	411	-0.00243259	411	-0.0024
413	-0.00793	413	-0.00519065	413	0.00852		412	0.00156	412	-0.00224113	412	-0.0024
414	-0.00718	414	-0.00435106	414	0.00787		413	0.00169	413	-0.00194967	413	-0.0024
415	-0.00632	415	-0.00341148	415	0.00701		414	0.00192	414	-0.00155821	414	-0.0025
416	-0.00547	416	-0.00247189	416	0.00626		415	0.00225	415	-0.00126676	415	-0.0025
417	-0.00471	417	-0.00163231	417	0.0055		416	0.00248	416	-0.000975301	416	-0.0024
418	-0.00386	418	-0.00069272	418	0.00485		417	0.00261	417	-0.000583844	417	-0.00231
419	-0.003	419	0.000246864	419	0.0043		418	0.00244	418	-0.000192387	418	-0.00211
420	-0.00225	420	0.00108645	420	0.00374		419	0.00227	419	0.00039907	419	-0.00191
421	-0.00159	421	0.00182603	421	0.00319		420	0.0022	420	0.00109053	420	-0.00181
422	-0.00104	422	0.00246562	422	0.00263		421	0.00233	421	0.00178198	421	-0.00161
423	-0.000685	423	0.0029052	423	0.00218		422	0.00256	422	0.00237344	422	-0.00142
424	-0.00033	424	0.00312506	424	0.00172		423	0.00279	423	0.0029649	423	-0.00122
425	-7.5e-05	425	0.00319205	425	0.00137		424	0.00283	424	0.00355635	424	-0.00091909
426	0.00018	426	0.00325904	426	0.00102		425	0.00266	425	0.00414781	425	-0.000620922
427	0.000235	427	0.00312603	427	0.0006625		426	0.00239	426	0.00473927	426	-0.000422754
428	0.00019	428	0.00289302	428	0.000308333		427	0.00212	427	0.00523073	427	-0.000324586
429	4.5e-05	429	0.00256001	429	5.41667e-05		428	0.00195	428	0.00562218	428	-0.000426419
430	8.52651e-14	430	0.00232699	430	-2.55795e-13		429	0.00178	429	0.00611364	429	-0.000628251
431	4e-05	431	0.00219398	431	-8.625e-05		430	0.00161	430	0.0066051	430	-0.000930083
432	0.00018	432	0.00216097	432	-0.0002725		431	0.00134	431	0.00699655	431	-0.00123
433	0.00032	433	0.00212796	433	-0.00045875		432	0.000970803	432	0.00738801	432	-0.00143
434	0.00036	434	0.00199495	434	-0.000645		433	0.000701512	433	0.00757947	433	-0.00154
435	0.0004	435	0.00186194	435	-0.00083125		434	0.000332221	434	0.00757092	434	-0.00174
436	0.00044	436	0.00172893	436	-0.00102		435	-3.70702e-05	435	0.00756238	435	-0.00194
437	0.00058	437	0.00169592	437	-0.0011		436	-0.000406361	436	0.00775384	436	-0.00224
438	0.00072	438	0.0016629	438	-0.00109		437	-0.000775652	437	0.0079453	437	-0.00264
439	0.00076	439	0.00152989	439	-0.00108		438	-0.00114	438	0.00833675	438	-0.00294
440	0.0009	440	0.00149688	440	-0.0008625		439	-0.00131	439	0.00862821	439	-0.00315
441	0.00104	441	0.00146387	441	-0.00074875		440	-0.00128	440	0.00901967	440	-0.00325
442	0.00118	442	0.00143086	442	-0.000635		441	-0.00115	441	0.00931112	441	-0.00325
443	0.00132	443	0.00139785	443	-0.00052125		442	-0.00102	442	0.00960258	442	-0.00335
444	0.00156	444	0.00146484	444	-0.0005075		443	-0.000991398	443	0.00989404	443	-0.00325
445	0.0016	445	0.00133183	445	-0.00059375		444	-0.000960689	444	0.0102855	444	-0.00316
446	0.00144	446	0.000998814	446	-0.00068		445	-0.00082998	445	0.010677	445	-0.00286
447	0.00118	447	0.000565803	447	-0.00056625		446	-0.000699271	446	0.0109684	446	-0.00246
448	0.00092	448	0.000132791	448	-0.0002525		447	-0.000568562	447	0.0113599	447	-0.00196
449	0.00076	449	-0.00020022	449	0.00026125		448	-0.000537853	448	0.0118513	448	-0.00156
450	0.0005	450	-0.000633231	450	0.000775		449	-0.000407144	449	0.0123428	449	-0.00126
451	0.00034	451	-0.000966243	451	0.00139		450	-0.000276435	450	0.0128342	450	-0.000966729
452	8e-05	452	-0.00139925	452	0.0019		451	-0.000145726	451	0.0133257	451	-0.000568561
453	-0.00028	453	-0.00193227	453	0.00222		452	-1.50173e-05	452	0.0137172	452	-0.000270394
454	-0.00064	454	-0.00246528	454	0.00253		453	0.000215692	453	0.0141086	453	2.7774e-05
455	-0.001	455	-0.00299829	455	0.00274		454	0.000246401	454	0.0143001	454	0.000325942
456	-0.00136	456	-0.0035313	456	0.00326		455	0.00027711	455	0.0144915	455	0.000424109
457	-0.00162	457	-0.00384316	457	0.00377		456	0.000307819	456	0.014583	456	0.000522277
458	-0.00178	458	-0.00389087	458	0.00438		457	0.000438528	457	0.0146744	457	0.000720445
459	-0.00204	459	-0.00403858	459	0.0049		458	0.000569237	458	0.0146659	458	0.000818613
460	-0.0022	460	-0.00408629	460	0.00541		459	0.000691357	459	0.0145573	459	0.000982283
461	-0.00236	461	-0.004134	461	0.00583		460	0.000913478	460	0.0143968	460	0.000945954
462	-0.00232	462	-0.0039817	462	0.00604		461	0.00124	461	0.0141363	461	0.000809624
463	-0.00238	463	-0.00392941	463	0.00605		462	0.00146	462	0.0138757	462	0.000573295
464	-0.00254	464	-0.00397712	464	0.00577		463	0.00178	463	0.0135152	463	0.000236965
465	-0.0029	465	-0.00422483	465	0.00538		464	0.002	464	0.0132547	464	6.35562e-07
466	-0.00316	466	-0.00437254	466	0.00489		465	0.00212	465	0.0130941	465	-0.000335694
467	-0.00352	467	-0.00462024	467	0.00461		466	0.00215	466	0.0128336	466	-0.000672023
468	-0.00388	468	-0.00486795	468	0.00432		467	0.00217	467	0.012473	467	-0.00101
469	-0.00424	469	-0.00511566	469	0.00394		468	0.00209	468	0.0121125	468	-0.00144
470	-0.0047	470	-0.00546337	470	0.00345		469	0.00201	469	0.011652	469	-0.00188
471	-0.00496	471	-0.00561108	471	0.00266		470	0.00193	470	0.0112914	470	-0.00222
472	-0.00532	472	-0.00585878	472	0.00178		471	0.00186	471	0.0108309	471	-0.00255
473	-0.00568	473	-0.00610649	473	0.00099125		472	0.00168	472	0.0102704	472	-0.00279
474	-0.00604	474	-0.0063542	474	0.000305		473	0.0015	473	0.00970982	473	-0.00293
475	-0.0065	475	-0.00670191	475	-8.125e-05		474	0.00122	474	0.00904929	474	-0.00306
476	-0.00696	476	-0.00704962	476	-0.0002675		475	0.00074529	475	0.00838875	475	-0.0031
477	-0.00742	477	-0.00739733	477	-0.00055375		476	0.000367411	476	0.00772821	476	-0.00314
478	-0.00788	478	-0.00774503	478	-0.00104		477	-0.000110468	477	0.00716767	477	-0.00307
479	-0.00814	479	-0.00789274	479	-0.00143		478	-0.000488347	478	0.00640714	478	-0.00311
480	-0.0083	480	-0.00794045	480	-0.00171		479	-0.000866227	479	0.0057466	479	-0.00314
481	-0.00846	481	-0.00798816	481	-0.0018		480	-0.00114	480	0.00488606	480	-0.00318
482	-0.00852	482	-0.00793587	482	-0.00198		481	-0.00142	481	0.00392552	481	-0.00312
483	-0.00848	483	-0.00778357	483	-0.00207		482	-0.0016	482	0.00296499	482	-0.00305
484	-0.00834	484	-0.00753128	484	-0.00206		483	-0.00178	483	0.00190445	483	-0.00299
485	-0.0082	485	-0.00727899	485	-0.00204		484	-0.00186	484	0.000843912	484	-0.00303
486	-0.00816	486	-0.0071267	486	-0.00203		485	-0.00193	485	-0.000116626	485	-0.00296
487	-0.00832	487	-0.00717441	487	-0.00192		486	-0.00211	486	-0.000977163	486	-0.003
488	-0.00868	488	-0.00742211	488	-0.0019		487	-0.00229	487	-0.0015377	487	-0.00293
489	-0.00884	489	-0.00746982	489	-0.00199		488	-0.00227	488	-0.00199824	488	-0.00297
490	-0.0089	490	-0.00741753	490	-0.00207		489	-0.00215	489	-0.00255878	489	-0.00291
491	-0.00876	491	-0.00716524	491	-0.00216		490	-0.00182	490	-0.00311931	490	-0.00284
492	-0.00842	492	-0.00671295	492	-0.00215		491	-0.0015	491	-0.00367985	491	-0.00268
493	-0.00808	493	-0.00626065	493	-0.00193		492	-0.00118	492	-0.00424039	492	-0.00252
494	-0.00794	494	-0.00600836	494	-0.00172		493	-0.000856535	493	-0.00480093	493	-0.00225
495	-0.0078	495	-0.00575607	495	-0.00141		494	-0.000534415	494	-0.00526146	494	-0.00209
496	-0.00776	496	-0.00560378	496	-0.00119		495	-0.000312294	495	-0.005722	495	-0.00183
497	-0.00752	497	-0.00525149	497	-0.00108		496	-0.000190173	496	-0.00618254	496	-0.00156
498	-0.00718	498	-0.00479919	498	-0.000865		497	0.000131948	497	-0.00654308	497	-0.0013
499	-0.00684	499	-0.0043469	499	-0.00075125		498	0.000354069	498	-0.00680361	498	-0.000934567
500	-0.0063	500	-0.00369461	500	-0.0005375		499	0.000676189	499	-0.00716415	499	-0.000670897
501	-0.00566	501	-0.00294232	501	-0.00042375		500	0.00099831	500	-0.00752469	500	-0.000307226
502	-0.00502	502	-0.00219003	502	-0.00011		501	0.00132	501	-0.00788523	501	0.000156444
503	-0.00418	503	-0.00123773	503	0.00020375		502	0.00144	502	-0.00844576	502	0.000720115
504	-0.00334	504	-0.000285443	504	0.0005175		503	0.00146	503	-0.0090063	503	0.00148
505	-0.0025	505	0.000666849	505	0.00063125		504	0.00119	504	-0.00956684	504	0.00205
506	-0.00186	506	0.00141914	506	0.000645		505	0.000908914	505	-0.0101274	505	0.00261
507	-0.00142	507	0.00197143	507	0.00045875		506	0.000731035	506	-0.0105879	506	0.00287
508	-0.00098	508	0.00191539	508	0.0003725		507	0.000553156	507	-0.0108485	507	0.00314
509	-0.00054	509	-0.00116938	509	0.00018625		508	0.000475277	508	-0.011109	508	0.0032
510	-4.54747e-13	510	-0.00415415	510	1.98952e-13		509	0.000397397	509	-0.0112695	509	0.00327
511	0.000261667	511	-0.00713892	511	-0.000159167		510	0.000219518	510	-0.0114301	510	0.00333
512	0.00122	512	-0.00942369	512	-0.000718333		511	-5.83611e-05	511	-0.0114906	511	0.00319
513	0.00439	513	-0.00950846	513	-0.00158		512	-0.00033624	512	-0.0114511	512	0.00316
514	0.01305	514	-0.00409323	514	-0.00174		513	-0.00061412	513	-0.0112117	513	0.00322
515	0.03081	515	0.0126287	515	4.16667e-06		514	-0.000891999	514	-0.0110722	514	0.00338
516	0.06057	516	0.0424146	516	0.00524		515	-0.000969878	515	-0.0109328	515	0.00345
517	0.10293	517	0.0848005	517	0.01499		516	-0.00105	516	-0.0108933	516	0.00341
518	0.15629	518	0.138186	518	0.02943		517	-0.000825636	517	-0.0109538	517	0.00318
519	0.21786	519	0.199772	519	0.04797		518	-0.000603516	518	-0.0109144	518	0.00294
520	0.28482	520	0.266758	520	0.06981		519	-0.000281395	519	-0.0107749	519	0.0027
521	0.35468	521	0.336644	521	0.09395		520	-5.92739e-05	520	-0.0105354	520	0.00257
522	0.42604	522	0.40803	522	0.11949		521	6.28469e-05	521	-0.010196	521	0.00253
523	0.498	523	0.480016	523	0.14593		522	-1.50323e-05	522	-0.00995651	522	0.00269
524	0.56976	524	0.551802	524	0.17287		523	-0.000192912	523	-0.00991705	523	0.00286
525	0.64043	525	0.622488	525	0.20011		524	-0.000370791	524	-0.00987759	524	0.00302
526	0.70929	526	0.691373	526	0.22725		525	-0.00024867	525	-0.00983813	525	0.00328
527	0.77485	527	0.756959	527	0.25409		526	-2.65491e-05	526	-0.00979866	526	0.00345
528	0.83491	528	0.817045	528	0.28013		527	0.000195572	527	-0.0099592	527	0.00371
529	0.88577	529	0.867931	529	0.30428		528	0.000417692	528	-0.0100197	528	0.00388
530	0.92373	530	0.905917	530	0.32512		529	0.000539813	529	-0.0100803	529	0.00394
531	0.9463	531	0.928503	531	0.34106		530	0.000461934	530	-0.00994081	530	0.0039
532	0.95296	532	0.935189	532	0.351		531	0.000284055	531	-0.00970135	531	0.00367
533	0.94522	533	0.927475	533	0.35474		532	-9.38244e-05	532	-0.00946189	532	0.00353
534	0.92598	534	0.908261	534	0.35288		533	-0.000471704	533	-0.00922243	533	0.00329
535	0.89844	535	0.880746	535	0.34642		534	-0.000849583	534	-0.00908296	534	0.00316
536	0.865	536	0.847332	536	0.33636		535	-0.00123	535	-0.0089435	535	0.00312
537	0.82727	537	0.809618	537	0.3236		536	-0.00141	536	-0.00870404	536	0.00308
538	0.78663	538	0.769004	538	0.30874		537	-0.00148	537	-0.00836458	537	0.00285
539	0.74389	539	0.72629	539	0.29228		538	-0.00146	538	-0.00792511	538	0.00261
540	0.69995	540	0.682376	540	0.27462		539	-0.00154	539	-0.00738565	539	0.00228
541	0.65581	541	0.638262	541	0.25637		540	-0.00182	540	-0.00704619	540	0.00204
542	0.61227	542	0.594748	542	0.23791		541	-0.00199	541	-0.00660673	541	0.0019
543	0.57014	543	0.552633	543	0.21975		542	-0.00217	542	-0.00626726	542	0.00187
544	0.53	544	0.512519	544	0.20239		543	-0.00235	543	-0.0057278	543	0.00183
545	0.49216	545	0.474705	545	0.18583		544	-0.00233	544	-0.00508834	544	0.00169
546	0.45652	546	0.439091	546	0.17017		545	-0.00241	545	-0.00434888	545	0.00156
547	0.42318	547	0.405777	547	0.15551		546	-0.00238	546	-0.00370941	546	0.00132
548	0.39214	548	0.374763	548	0.14175		547	-0.00226	547	-0.00296995	547	0.00109
549	0.36331	549	0.345949	549	0.12889		548	-0.00204	548	-0.00233049	548	0.000948958
550	0.33667	550	0.319335	550	0.11713		549	-0.00172	549	-0.00159103	549	0.000712628
551	0.31213	551	0.294821	551	0.10647		550	-0.0014	550	-0.000851563	550	0.000576299
552	0.28939	552	0.272106	552	0.09681		551	-0.00117	551	-0.0001121	551	0.000239969
553	0.26835	553	0.251092	553	0.08786		552	-0.000951408	552	0.000627362	552	-9.63602e-05
554	0.24881	554	0.231578	554	0.0797		553	-0.000829288	553	0.00126682	553	-0.00033269
555	0.23088	555	0.213664	555	0.07224		554	-0.000507167	554	0.00180629	554	-0.000469019
556	0.21444	556	0.19725	556	0.06528		555	-0.000185046	555	0.00244575	555	-0.000705349
557	0.1996	557	0.182436	557	0.05892		556	0.000137075	556	0.00318521	556	-0.000841678
558	0.18596	558	0.168822	558	0.05316		557	0.000459196	557	0.00382467	557	-0.00108
559	0.17352	559	0.156408	559	0.0477		558	0.000681316	558	0.00436414	558	-0.00111
560	0.16198	560	0.144893	560	0.04274		559	0.000803437	559	0.0048036	559	-0.00125
561	0.15125	561	0.134179	561	0.03818		560	0.000925558	560	0.00514306	560	-0.00129
562	0.14121	562	0.124165	562	0.03392		561	0.00105	561	0.00538252	561	-0.00122
563	0.13187	563	0.114851	563	0.03016		562	0.00107	562	0.00562199	562	-0.00116
564	0.12313	564	0.106137	564	0.0266		563	0.00099192	563	0.00586145	563	-0.0011
565	0.11499	565	0.0980229	565	0.02325		564	0.000914041	564	0.00610091	564	-0.00113
566	0.10735	566	0.0904088	566	0.01999		565	0.000836162	565	0.00634037	565	-0.00107
567	0.10042	567	0.0834947	567	0.01703		566	0.000758283	566	0.00647984	566	-0.001
568	0.09428	568	0.0773806	568	0.01417		567	0.000780404	567	0.0066193	567	-0.000941303
569	0.08884	569	0.0719664	569	0.01151		568	0.000702524	568	0.00665876	568	-0.000877632
570	0.0839	570	0.0670523	570	0.00905		569	0.000724645	569	0.00669823	569	-0.000813962
571	0.07906	571	0.0622382	571	0.00689		570	0.000646766	570	0.00663769	570	-0.000850291
572	0.07442	572	0.0576241	572	0.00483		571	0.000568887	571	0.00637715	571	-0.000986621
573	0.06989	573	0.05311	573	0.00297		572	0.000591008	572	0.00621661	572	-0.00112
574	0.06575	574	0.0489959	574	0.00121		573	0.000613128	573	0.00615608	573	-0.00126
575	0.06201	575	0.0452818	575	-0.000445833		574	0.000635249	574	0.00619554	574	-0.0012
576	0.05857	576	0.0418676	576	-0.002		575	0.00075737	575	0.006335	575	-0.000931939
577	0.05543	577	0.0387535	577	-0.00346		576	0.000779491	576	0.00647446	576	-0.000568268
578	0.05249	578	0.0358394	578	-0.00502		577	0.000701612	577	0.00651393	577	-0.000304598
579	0.04986	579	0.0332253	579	-0.00638		578	0.000523732	578	0.00655339	578	-0.000140927
580	0.04732	580	0.0307112	580	-0.00764		579	0.000245853	579	0.00649285	579	-7.72567e-05
581	0.04498	581	0.0283971	581	-0.0087		580	-3.20261e-05	580	0.00643231	580	-0.000213586
582	0.04274	582	0.0261829	582	-0.00966		581	-0.000309905	581	0.00627178	581	-0.000349916
583	0.0405	583	0.0239688	583	-0.01072		582	-0.000487785	582	0.00601124	582	-0.000386245
584	0.03826	584	0.0217547	584	-0.01168		583	-0.000565664	583	0.0058507	583	-0.000422575
585	0.03613	585	0.0196406	585	-0.01254		584	-0.000543543	584	0.00579016	584	-0.000258904
586	0.03419	586	0.0177265	586	-0.0132		585	-0.000521422	585	0.00582963	585	-0.000195234
587	0.03245	587	0.0160124	587	-0.01386		586	-0.000399301	586	0.00586909	586	-3.15632e-05
588	0.03081	588	0.0143982	588	-0.01442		587	-0.000377181	587	0.00580855	587	0.000132107
589	0.02927	589	0.0128841	589	-0.01507		588	-0.00035506	588	0.00564801	588	0.000195778
590	0.02773	590	0.01137	590	-0.01573		589	-0.000532939	589	0.00538748	589	5.94483e-05
591	0.0263	591	0.00995588	591	-0.01629		590	-0.000610818	590	0.00502694	590	-0.000176881
592	0.02486	592	0.00854177	592	-0.01675		591	-0.000588697	591	0.0046664	591	-0.000413211
593	0.02352	593	0.00722765	593	-0.01721		592	-0.000466577	592	0.00440586	592	-0.00064954
594	0.02248	594	0.00621353	594	-0.01767		593	-0.000244456	593	0.00404533	593	-0.00088587
595	0.02144	595	0.00519942	595	-0.01793		594	7.76651e-05	594	0.00368479	594	-0.000922199
596	0.0205	596	0.0042853	596	-0.01809		595	0.000299786	595	0.00322425	595	-0.000958529
597	0.01947	597	0.00327118	597	-0.01815		596	0.000621907	596	0.00286371	596	-0.00109
598	0.01833	598	0.00215707	598	-0.01801		597	0.000844027	597	0.00240318	597	-0.00113
599	0.01729	599	0.00114295	599	-0.01787		598	0.000966148	598	0.00194264	598	-0.00127
600	0.01645	600	0.000328834	600	-0.01772		599	0.00109	599	0.0013821	599	-0.0015
601	0.01591	601	-0.000185283	601	-0.01768		600	0.00111	600	0.000921563	600	-0.00164
602	0.01557	602	-0.000499399	602	-0.01764		601	0.00103	601	0.000461025	601	-0.00178
603	0.01523	603	-0.000813516	603	-0.0175		602	0.00105	602	4.87782e-07	602	-0.00201
604	0.0149	604	-0.00112763	604	-0.01726		603	0.00118	603	-0.00046005	603	-0.00215
605	0.01446	605	-0.00123736	605	-0.01702		604	0.0012	604	-0.000920587	604	-0.00229
606	0.01402	606	-0.000983726	606	-0.01698		605	0.00122	605	-0.00138112	605	-0.00232
607	0.01358	607	-0.00073009	607	-0.01694		606	0.00124	606	-0.00184166	606	-0.00226
608	0.01304	608	-0.000576453	608	-0.0167		607	0.00137	607	-0.0023022	607	-0.00219
609	0.01261	609	-0.000322817	609	-0.01646		608	0.00139	608	-0.00286274	608	-0.00203
610	0.01197	610	-0.000269181	610	-0.01602		609	0.00134	609	-0.00342327	609	-0.00192
611	0.01153	611	-1.55443e-05	611	-0.01558		610	0.00269	610	-0.00326307	610	-0.0012
612	0.01119	612	0.000338092	612	-0.01513		611	0.01085	611	0.000597126	611	0.00321
613	0.01085	613	0.000691728	613	-0.01459		612	0.0373	612	0.0155573	612	0.01803
614	0.01051	614	0.00104536	614	-0.01395		613	0.09715	613	0.0524175	613	0.05244
615	0.01008	615	0.001299	615	-0.01341		614	0.20151	614	0.120278	614	0.11376
616	0.00954	616	0.00145264	616	-0.01277		615	0.35226	615	0.222438	615	0.20337
617	0.0088	617	0.00140627	617	-0.01213		616	0.54201	616	0.354998	616	0.31659
618	0.00816	618	0.00145991	618	-0.01149		617	0.75847	617	0.509858	617	0.4453
619	0.00772	619	0.00171355	619	-0.01085		618	0.98982	618	0.678119	618	0.58132
620	0.00738	620	0.00206718	620	-0.01021		619	1.22767	619	0.852879	619	0.71913
621	0.00705	621	0.00242082	621	-0.00927		620	1.46743	620	1.03004	620	0.85585
622	0.00671	622	0.00277446	622	-0.00813		621	1.70658	621	1.2073	621	0.99016
623	0.00627	623	0.00302809	623	-0.00699		622	1.94313	622	1.38316	622	1.12118
624	0.00573	624	0.00318173	624	-0.00584		623	2.17429	623	1.55552	623	1.24729
625	0.00499	625	0.00344625	625	-0.0049		624	2.39674	624	1.72188	624	1.36691
626	0.00415	626	0.00369189	626	-0.00396		625	2.60629	625	1.87944	625	1.47792
627	0.00332	627	0.00393753	627	-0.00322		626	2.79595	626	2.0236	626	1.57634
628	0.00238	628	0.00408317	628	-0.00228		627	2.9535	627	2.14646	627	1.65525
629	0.00124	629	0.00402881	629	-0.00114		628	3.06425	628	2.23732	628	1.70577
630	0	630	0.00387445	630	2.84217e-14		629	3.11771	629	2.28738	629	1.72118
631	-0.00095375	631	0.00372008	631	0.00121		630	3.11236	630	2.29384	630	1.7006
632	-0.00201	632	0.00346572	632	0.00252		631	3.05611	631	2.2609	631	1.64931
633	-0.00306	633	0.00321136	633	0.00383		632	2.96167	632	2.19706	632	1.57583
634	-0.00422	634	0.002857	634	0.00514		633	2.84152	633	2.11152	633	1.48864
635	-0.00557	635	0.00230264	635	0.00634		634	2.70487	634	2.01178	634	1.39386
636	-0.00712	636	0.00154827	636	0.00735		635	2.55703	635	1.90244	635	1.29477
637	-0.00878	637	0.000693913	637	0.00826		636	2.40128	636	1.7867	636	1.19349
638	-0.01023	638	3.95507e-05	638	0.00887		637	2.24043	637	1.66666	637	1.0916
639	-0.01168	639	-0.000614811	639	0.00948		638	2.07799	638	1.54492	638	0.99092
640	-0.01294	640	-0.00106917	640	0.00989		639	1.91774	639	1.42418	639	0.89353
641	-0.01409	641	-0.00142353	641	0.0103		640	1.76299	640	1.30714	640	0.80135
642	-0.01525	642	-0.0017779	642	0.01051		641	1.61595	641	1.1957	641	0.71546
643	-0.0162	643	-0.00193226	643	0.01051		642	1.4776	642	1.09066	642	0.63648
644	-0.01705	644	-0.00198662	644	0.01022		643	1.34835	643	0.992424	643	0.56419
645	-0.01781	645	-0.00194098	645	0.00973		644	1.22801	644	0.900784	644	0.49831
646	-0.01836	646	-0.00169534	646	0.00914		645	1.11636	645	0.815744	645	0.43852
647	-0.01901	647	-0.00154971	647	0.00825		646	1.01341	646	0.737404	646	0.38454
648	-0.01957	648	-0.00130407	648	0.00726		647	0.91887	647	0.665564	647	0.33585
649	-0.02012	649	-0.00155804	649	0.00607		648	0.83252	648	0.600225	648	0.29247
650	-0.02048	650	-0.00205396	650	0.00478		649	0.75387	649	0.540785	649	0.25388
651	-0.02083	651	-0.00254988	651	0.00348		650	0.68263	650	0.486845	650	0.2195
652	-0.02108	652	-0.00294579	652	0.00209		651	0.61788	651	0.437805	651	0.18891
653	-0.02124	653	-0.00324171	653	0.00080125		652	0.55923	652	0.393265	652	0.16163
654	-0.02139	654	-0.00353763	654	-0.00049		653	0.50609	653	0.353226	653	0.13724
655	-0.02134	655	-0.00363355	655	-0.00168		654	0.45804	654	0.317086	654	0.11556
656	-0.0213	656	-0.00372946	656	-0.00277		655	0.41479	655	0.284546	655	0.09627
657	-0.02125	657	-0.00382538	657	-0.00396		656	0.37595	656	0.255406	656	0.07919
658	-0.02121	658	-0.0039213	658	-0.00505		657	0.3409	657	0.229266	657	0.0642
659	-0.02106	659	-0.00391722	659	-0.00605		658	0.30945	658	0.205927	658	0.05092
660	-0.02081	660	-0.00381313	660	-0.00684		659	0.28131	659	0.185087	659	0.03913
661	-0.02047	661	-0.00360905	661	-0.00753		660	0.25606	660	0.166447	660	0.02855
662	-0.02012	662	-0.00340497	662	-0.00792		661	0.23341	661	0.149807	661	0.01906
663	-0.01967	663	-0.00310089	663	-0.00821		662	0.21316	662	0.135167	662	0.01058
664	-0.01913	664	-0.0026968	664	-0.0083		663	0.19512	663	0.122128	663	0.00309
665	-0.01858	665	-0.00229272	665	-0.00819		664	0.17897	664	0.110688	664	-0.00339
666	-0.01804	666	-0.00188864	666	-0.00788		665	0.16462	665	0.100648	665	-0.00898
667	-0.01749	667	-0.00148456	667	-0.00758		666	0.15188	666	0.0918082	666	-0.01376
668	-0.01684	668	-0.000980475	668	-0.00717		667	0.14053	667	0.0841684	667	-0.01785
669	-0.0163	669	-0.000576392	669	-0.00676		668	0.13038	668	0.0773286	668	-0.02123
670	-0.01585	670	-0.000272309	670	-0.00635		669	0.12154	669	0.0712888	669	-0.02412
671	-0.0152	671	0.000231773	671	-0.00594		670	0.11369	670	0.066049	670	-0.0263
672	-0.01456	672	0.000735856	672	-0.00523		671	0.10664	671	0.0616092	671	-0.02809
673	-0.01391	673	0.00123994	673	-0.00432		672	0.1005	672	0.0579694	672	-0.02957
674	-0.01326	674	0.00174402	674	-0.00341		673	0.09515	673	0.0549296	673	-0.03066
675	-0.01272	675	0.00213048	675	-0.00251		674	0.0905	674	0.0523898	674	-0.03144
676	-0.01217	676	0.00225246	676	-0.0017		675	0.08666	675	0.05025	675	-0.03163
677	-0.01153	677	0.00247445	677	-0.00098875		676	0.08331	676	0.0484102	676	-0.03131
678	-0.01078	678	0.00279644	678	-0.00048		677	0.08066	677	0.0468704	677	-0.0306
679	-0.00993	679	0.00321842	679	0.00012875		678	0.07832	678	0.0456306	678	-0.02968
680	-0.00909	680	0.00364041	680	0.0006375		679	0.07627	679	0.0445908	679	-0.02847
681	-0.00824	681	0.00406239	681	0.00125		680	0.07452	680	0.043951	680	-0.02705
682	-0.00739	682	0.00448438	682	0.00185		681	0.07298	681	0.0434112	681	-0.02564
683	-0.00665	683	0.00480637	683	0.00256		682	0.07153	682	0.0430714	682	-0.02432
684	-0.006	684	0.00502835	684	0.00337		683	0.07008	683	0.0429316	683	-0.02291
685	-0.00526	685	0.00535034	685	0.00408		684	0.06884	684	0.0428918	684	-0.02169
686	-0.00451	686	0.00567233	686	0.00479		685	0.06769	685	0.042852	685	-0.02048
687	-0.00366	687	0.00609431	687	0.0054		686	0.06674	686	0.0429122	686	-0.01926
688	-0.00292	688	0.0064163	688	0.00601		687	0.0659	687	0.0431724	687	-0.01795
689	-0.00217	689	0.00673829	689	0.00662		688	0.06515	688	0.0434326	688	-0.01653
690	-0.00142	690	0.00706027	690	0.00712		689	0.0643	689	0.0439928	689	-0.01522
691	-0.00087875	691	0.00718226	691	0.00753		690	0.06326	690	0.044653	690	-0.0139
692	-0.0005325	692	0.00710424	692	0.00784		691	0.06211	691	0.0454132	691	-0.01279
693	-0.00048625	693	0.00672623	693	0.00815		692	0.06096	692	0.0461734	692	-0.01177
694	-0.00044	694	0.00634822	694	0.00836		693	0.05992	693	0.0469336	693	-0.01076
695	-0.00039375	695	0.0059702	695	0.00837		694	0.05907	694	0.0474938	694	-0.00974
696	-0.0001475	696	0.00579219	696	0.00818		695	0.05822	695	0.048054	695	-0.00883
697	9.875e-05	697	0.00561418	697	0.00799		696	0.05748	696	0.0483142	696	-0.00791
698	0.000345	698	0.00543616	698	0.00749		697	0.05683	697	0.0486744	697	-0.0071
699	0.00059125	699	0.00525815	699	0.007		698	0.05618	698	0.0489346	698	-0.00638
700	0.0006375	700	0.00488014	700	0.00651		699	0.05554	699	0.0492948	699	-0.00557
701	0.00048375	701	0.00430212	701	0.00592		700	0.05489	700	0.049755	700	-0.00475
702	0.00023	702	0.00362411	702	0.00523		701	0.05424	701	0.0501152	701	-0.00404
703	-0.00012375	703	0.0028461	703	0.00444		702	0.0537	702	0.0504754	702	-0.00332
704	-0.0003775	704	0.00216808	704	0.00365		703	0.05325	703	0.0506356	703	-0.00261
705	-0.00043125	705	0.00169007	705	0.00276		704	0.0528	704	0.0505958	704	-0.00199
706	-0.000485	706	0.00121205	706	0.00206		705	0.05236	705	0.050556	705	-0.00128
707	-0.00033875	707	0.000934041	707	0.00157		706	0.05201	706	0.0504162	706	-0.000462386
708	-0.0002925	708	0.000556027	708	0.0009825		707	0.05156	707	0.0503764	707	0.000352598
709	-0.00014625	709	0.000278014	709	0.00059125		708	0.05102	708	0.0502366	708	0.00107
710	1.7053e-13	710	5.68434e-13	710	-3.41061e-13		709	0.05027	709	0.0500968	709	0.00158
711	1.25e-05	711	-0.00525453	711	-0.00111		710	0.04952	710	0.049957	710	0.0021
712	0.000625	712	-0.00990905	712	-0.00261		711	0.04868	711	0.0498172	711	0.00271
713	0.00334	713	-0.0124636	713	-0.00432		712	0.04783	712	0.0495774	712	0.00343
714	0.01095	714	-0.00539711	714	-0.00533		713	0.04718	713	0.0493376	713	0.00424
715	0.02676	715	0.010351	715	-0.00434		714	0.04664	714	0.0490978	714	0.00516
716	0.05318	716	0.0366992	716	0.000255		715	0.04589	715	0.048758	715	0.00587
717	0.09069	717	0.0741473	717	0.00935		716	0.04514	716	0.0484182	716	0.00659
718	0.138	718	0.121395	718	0.02334		717	0.0442	717	0.0479784	717	0.0071
719	0.19251	719	0.175844	719	0.04133		718	0.04315	718	0.0475386	718	0.00772
720	0.25133	720	0.234592	720	0.06233		719	0.0421	719	0.0470988	719	0.00813
721	0.31274	721	0.29594	721	0.08552		720	0.04106	720	0.046559	720	0.00835
722	0.37535	722	0.358488	722	0.11001		721	0.04021	721	0.0459192	721	0.00846
723	0.43846	723	0.421536	723	0.1355		722	0.03936	722	0.0449794	722	0.00848
724	0.50138	724	0.484384	724	0.1617		723	0.03852	723	0.0440396	723	0.00849
725	0.56339	725	0.546333	725	0.18839		724	0.03767	724	0.0431998	724	0.00861
726	0.6238	726	0.606681	726	0.21538		725	0.03682	725	0.04236	725	0.00882
727	0.68141	727	0.664229	727	0.24227		726	0.03598	726	0.0417202	726	0.00904
728	0.73423	728	0.716977	728	0.26867		727	0.03523	727	0.0409804	727	0.00925
729	0.77904	729	0.761725	729	0.29356		728	0.03438	728	0.0401406	728	0.00927
730	0.81265	730	0.795273	730	0.31515		729	0.03354	729	0.0392008	729	0.00918
731	0.83266	731	0.815221	731	0.33204		730	0.03259	730	0.038261	730	0.009
732	0.83868	732	0.82117	732	0.34294		731	0.03164	731	0.0374212	731	0.00891
733	0.83199	733	0.814418	733	0.34803		732	0.0307	732	0.0366814	732	0.00883
734	0.8153	734	0.797666	734	0.34772		733	0.02975	733	0.0358416	733	0.00874
735	0.79131	735	0.773614	735	0.34311		734	0.0288	734	0.0349018	734	0.00856
736	0.76223	736	0.744462	736	0.33531		735	0.02785	735	0.033762	735	0.00857
737	0.72944	737	0.71161	737	0.3251		736	0.02681	736	0.0326222	736	0.00859
738	0.69395	738	0.676059	738	0.31299		737	0.02596	737	0.0315824	737	0.0085
739	0.65666	739	0.638707	739	0.29938		738	0.02511	738	0.0304426	738	0.00842
740	0.61828	740	0.600255	740	0.28458		739	0.02427	739	0.0293028	739	0.00813
741	0.57959	741	0.561503	741	0.26917		740	0.02352	740	0.027963	740	0.00785
742	0.5415	742	0.523351	742	0.25356		741	0.02257	741	0.0267232	741	0.00736
743	0.50451	743	0.486299	743	0.23815		742	0.02153	742	0.0255834	742	0.00688
744	0.46923	744	0.450947	744	0.22315		743	0.02048	743	0.0244436	743	0.00639
745	0.43574	745	0.417396	745	0.20874		744	0.01933	744	0.0235038	744	0.00601
746	0.40425	746	0.385844	746	0.19503		745	0.01839	745	0.022364	745	0.00562
747	0.37456	747	0.356092	747	0.18212		746	0.01744	746	0.0212242	746	0.00554
748	0.34678	748	0.32824	748	0.16992		747	0.01669	747	0.0198844	747	0.00535
749	0.32099	749	0.302388	749	0.15851		748	0.01595	748	0.0186446	748	0.00527
750	0.297	750	0.278336	750	0.1479		749	0.0151	749	0.0175048	749	0.00508
751	0.27471	751	0.255985	751	0.13799		750	0.01415	750	0.016365	750	0.0048
752	0.25403	752	0.235233	752	0.12889		751	0.01311	751	0.0152252	751	0.00451
753	0.23474	753	0.215881	753	0.12028		752	0.01206	752	0.0139854	752	0.00403
754	0.21685	754	0.197929	754	0.11227		753	0.01111	753	0.0129456	753	0.00364
755	0.20036	755	0.181377	755	0.10476		754	0.01017	754	0.0120058	754	0.00336
756	0.18528	756	0.166225	756	0.09746		755	0.00932	755	0.011166	755	0.00317
757	0.17139	757	0.152273	757	0.09055		756	0.00857	756	0.0104262	756	0.00289
758	0.1587	758	0.139522	758	0.08384		757	0.00783	757	0.0094864	757	0.0026
759	0.14711	759	0.12787	759	0.07733		758	0.00708	758	0.0085466	758	0.00232
760	0.13643	760	0.117118	760	0.07113		759	0.00664	759	0.0075068	759	0.00207
761	0.12674	761	0.107366	761	0.06512		760	0.0062	760	0.00656609	760	0.00182
762	0.11775	762	0.0983142	762	0.05921		761	0.00555	761	0.00572537	761	0.00166
763	0.10936	763	0.0898623	763	0.0535		762	0.00501	762	0.00478466	762	0.00161
764	0.10158	764	0.0820105	764	0.04799		763	0.00447	763	0.00394394	763	0.00156
765	0.09439	765	0.0747587	765	0.04279		764	0.00393	764	0.00320323	764	0.00161
766	0.0878	766	0.0681068	766	0.03788		765	0.00348	765	0.00256251	765	0.00146
767	0.08191	767	0.062155	767	0.03317		766	0.00324	766	0.0020218	766	0.00141
768	0.07663	768	0.0568031	768	0.02867		767	0.003	767	0.00148108	767	0.00146
769	0.07184	769	0.0519513	769	0.02446		768	0.00266	768	0.00084037	768	0.00161
770	0.06745	770	0.0474994	770	0.02035		769	0.00232	769	0.000199656	769	0.00166
771	0.06346	771	0.0434476	771	0.01654		770	0.00207	770	-0.000541059	770	0.00171
772	0.05978	772	0.0396957	772	0.01293		771	0.00183	771	-0.00128177	771	0.00156
773	0.05649	773	0.0363439	773	0.00953		772	0.00169	772	-0.00202249	772	0.00151
774	0.0534	774	0.033192	774	0.00632		773	0.00165	773	-0.0027632	773	0.00156
775	0.05061	775	0.0303402	775	0.00361		774	0.0015	774	-0.00350392	774	0.00161
776	0.04802	776	0.0276883	776	0.00131		775	0.00146	775	-0.00414463	775	0.00176
777	0.04554	777	0.0251365	777	-0.0006025		776	0.00122	776	-0.00478535	776	0.0016
778	0.04345	778	0.0229846	778	-0.00221		777	0.00108	777	-0.00532606	777	0.00125
779	0.04176	779	0.0212328	779	-0.00352		778	0.000934501	778	-0.00586678	778	0.000903054
780	0.04027	780	0.0196809	780	-0.00453		779	0.000792198	779	-0.00650749	779	0.000652368
781	0.03909	781	0.0184291	781	-0.00543		780	0.000549894	780	-0.0071482	780	0.000601682
782	0.0381	782	0.0173772	782	-0.00624		781	0.00020759	781	-0.00758892	781	0.000650996
783	0.03721	783	0.0164254	783	-0.00705		782	-0.000234713	782	-0.00792963	782	0.000700309
784	0.03632	784	0.0154735	784	-0.00776		783	-0.000677017	783	-0.00807035	783	0.000549623
785	0.03534	785	0.0144217	785	-0.00836		784	-0.00112	784	-0.00821106	784	0.000198937
786	0.03425	786	0.0132699	786	-0.00867		785	-0.00166	785	-0.00825178	785	-5.17493e-05
787	0.03316	787	0.012118	787	-0.00878		786	-0.0022	786	-0.00829249	786	9.75645e-05
788	0.03207	788	0.0109662	788	-0.00859		787	-0.00285	787	-0.00823321	787	0.000246878
789	0.03089	789	0.00971431	789	-0.00839		788	-0.00349	788	-0.00817392	788	0.000396192
790	0.0298	790	0.00856246	790	-0.008		789	-0.00403	789	-0.00801464	789	0.000345506
791	0.02871	791	0.00741061	791	-0.00761		790	-0.00467	790	-0.00785535	790	0.00019482
792	0.02772	792	0.00635876	792	-0.00702		791	-0.00522	791	-0.00769606	791	4.41334e-05
793	0.02664	793	0.00520692	793	-0.00622		792	-0.00586	792	-0.00743678	792	9.34472e-05
794	0.02555	794	0.00405507	794	-0.00553		793	-0.0064	793	-0.00707749	793	0.000142761
795	0.02436	795	0.00280322	795	-0.00494		794	-0.00704	794	-0.00661821	794	9.20747e-05
796	0.02307	796	0.00145137	796	-0.00445		795	-0.00758	795	-0.00605892	795	0.000141389
797	0.02179	797	0.000927482	797	-0.00385		796	-0.00813	796	-0.00559964	796	0.000290702
798	0.0205	798	0.000754217	798	-0.00316		797	-0.00867	797	-0.00524035	797	0.000440016
799	0.01931	799	0.000680952	799	-0.00237		798	-0.00911	798	-0.00508107	798	0.00078933
800	0.01822	800	0.000707686	800	-0.00148		799	-0.00945	799	-0.00502178	799	0.000938644
801	0.01724	801	0.000834421	801	-0.0004825		800	-0.0098	800	-0.0050625	800	0.000887957
802	0.01635	802	0.00106116	802	0.00041		801	-0.01014	801	-0.00490321	801	0.000637271
803	0.01546	803	0.00128789	803	0.0012		802	-0.01038	802	-0.00464392	802	0.000286585
804	0.01447	804	0.00141462	804	0.00189		803	-0.01062	803	-0.00428464	803	-6.41012e-05
805	0.01349	805	0.00154136	805	0.00239		804	-0.01087	804	-0.00382535	804	-0.000114787
806	0.0125	806	0.00166809	806	0.00278		805	-0.01101	805	-0.00356607	805	-0.000165474
807	0.01141	807	0.00169483	807	0.00317		806	-0.01095	806	-0.00350678	806	-0.00021616
808	0.01052	808	0.00192156	808	0.00337		807	-0.01069	807	-0.0033475	807	-0.000366846
809	0.00974	809	0.0022483	809	0.00356		808	-0.01023	808	-0.00318821	808	-0.000617532
810	0.00885	810	0.00247503	810	0.00375		809	-0.00968	809	-0.00302893	809	-0.000768218
811	0.00786	811	0.00247294	811	0.00414		810	-0.00902	810	-0.00276964	810	-0.00102
812	0.00677	812	0.00159975	812	0.00443		811	-0.00826	811	-0.00251036	811	-0.00137
813	0.00569	813	0.000726561	813	0.00473		812	-0.0074	812	-0.00225107	812	-0.00182
814	0.0045	814	-0.000246632	814	0.00492		813	-0.00645	813	-0.00189179	813	-0.00227
815	0.00351	815	-0.00101982	815	0.00501		814	-0.00539	814	-0.0013325	814	-0.00252
816	0.00272	816	-0.00159302	816	0.005		815	-0.00443	815	-0.000773214	815	-0.00267
817	0.00204	817	-0.00206621	817	0.0049		816	-0.00347	816	-0.000213929	816	-0.00272
818	0.00135	818	-0.0025394	818	0.00469		817	-0.00242	817	4.53566e-05	817	-0.00257
819	0.0008625	819	-0.00281259	819	0.00458		818	-0.00126	818	0.000204642	818	-0.00252
820	0.000375	820	-0.00308578	820	0.00437		819	5.51608e-08	819	0.000163927	819	-0.00238
821	-0.0001125	821	-0.00335898	821	0.00427		820	0.00126	820	0.000323213	820	-0.00233
822	-0.0006	822	-0.00363217	822	0.00416		821	0.00252	821	0.000582498	821	-0.00228
823	-0.0008875	823	-0.00370536	823	0.00395		822	0.00377	822	0.000941784	822	-0.00223
824	-0.00108	824	-0.00367855	824	0.00354		823	0.00483	823	0.00120107	823	-0.00208
825	-0.00106	825	-0.00345175	825	0.00304		824	0.00579	824	0.00156035	824	-0.00203
826	-0.00095	826	-0.00312494	826	0.00243		825	0.00655	825	0.00181964	825	-0.00198
827	-0.0007375	827	-0.00269813	827	0.00172		826	0.0072	826	0.00207893	826	-0.00183
828	-0.000425	828	-0.00217132	828	0.00111		827	0.00776	827	0.00233821	827	-0.00178
829	-0.0002125	829	-0.00174451	829	0.0006075		828	0.00832	828	0.0025975	828	-0.00173
830	-3.97904e-13	830	-0.00131771	830	-5.68434e-14		829	0.00878	829	0.00295678	829	-0.00158
831	0.00010125	831	-0.000890899	831	-0.000815		830	0.00913	830	0.00311607	830	-0.00153
832	0.0001025	832	-0.000564091	832	-0.00153		831	0.00929	831	0.00337535	831	-0.00148
833	0.00020375	833	-0.000137283	833	-0.00234		832	0.00935	832	0.00383464	832	-0.00143
834	0.000305	834	0.000289525	834	-0.00326		833	0.00911	833	0.00439392	833	-0.00138
835	0.00070625	835	0.00101633	835	-0.00407		834	0.00867	834	0.00515321	834	-0.00134
836	0.00121	836	0.00180724	836	-0.00499		835	0.00802	835	0.00581249	835	-0.00119
837	0.00181	837	0.00198581	837	-0.0058		836	0.00718	836	0.00637178	836	-0.00114
838	0.00231	838	0.00206438	838	-0.00652		837	0.00614	837	0.00683107	837	-0.00109
839	0.00261	839	0.00194296	839	-0.00713		838	0.0051	838	0.00709035	838	-0.00104
840	0.00271	840	0.00162153	840	-0.00765		839	0.00395	839	0.00724964	839	-0.000988805
841	0.00291	841	0.0014001	841	-0.00796		840	0.00291	840	0.00760892	840	-0.000839491
842	0.00322	842	0.00127868	842	-0.00838		841	0.00187	841	0.00796821	841	-0.000690177
843	0.00372	843	0.00135725	843	-0.00869		842	0.000927073	842	0.00842749	842	-0.000640864
844	0.00432	844	0.00153582	844	-0.00891		843	-0.00011523	843	0.00878678	843	-0.00069155
845	0.00492	845	0.0017144	845	-0.00892		844	-0.00116	844	0.00904606	844	-0.000742236
846	0.00552	846	0.00189297	846	-0.00894		845	-0.0021	845	0.00920535	845	-0.000792922
847	0.00592	847	0.00187154	847	-0.00885		846	-0.00294	846	0.00936463	846	-0.000743608
848	0.00622	848	0.00175012	848	-0.00847		847	-0.00358	847	0.00952392	847	-0.000694295
849	0.00642	849	0.00152869	849	-0.00798		848	-0.00403	848	0.00958321	848	-0.000544981
850	0.00653	850	0.00120726	850	-0.0073		849	-0.00417	849	0.00954249	849	-0.000395667
851	0.00673	851	0.000985838	851	-0.00671		850	-0.00421	850	0.00970178	850	-0.000246353
852	0.00703	852	0.000864411	852	-0.00623		851	-0.00395	851	0.00976106	851	2.96052e-06
853	0.00733	853	0.000742984	853	-0.00584		852	-0.0036	852	0.0100203	852	0.000152274
854	0.00773	854	0.000721558	854	-0.00546		853	-0.00314	853	0.0101796	853	0.000301588
855	0.00803	855	0.000600131	855	-0.00507		854	-0.00258	854	0.0102389	854	0.000150902
856	0.00813	856	0.000278704	856	-0.00479		855	-0.00192	855	0.0101982	855	-9.97843e-05
857	0.00823	857	-4.27225e-05	857	-0.0045		856	-0.00137	856	0.00985749	856	-0.000350471
858	0.00814	858	-0.000564149	858	-0.00412		857	-0.00050748	857	0.00961677	857	-0.000501157
859	0.00794	859	-0.000504819	859	-0.00383		858	0.000450216	858	0.00937606	858	-0.000651843
860	0.00784	860	-0.000339446	860	-0.00365		859	0.00171	859	0.00933534	859	-0.000602529
861	0.00774	861	-0.000174072	861	-0.00356		860	0.00287	860	0.00929463	860	-0.000453215
862	0.00764	862	-8.69839e-06	862	-0.00348		861	0.00392	861	0.00915392	861	-0.000503902
863	0.00754	863	0.000156675	863	-0.00339		862	0.00498	862	0.0089132	862	-0.000754588
864	0.00744	864	0.000322049	864	-0.00331		863	0.00604	863	0.00857249	863	-0.00121
865	0.00704	865	0.000187422	865	-0.00312		864	0.0071	864	0.00813177	864	-0.00176
866	0.00635	866	-0.000247204	866	-0.00274		865	0.00805	865	0.00769106	865	-0.00231
867	0.00535	867	-0.000981831	867	-0.00225		866	0.00901	866	0.00725034	866	-0.00276
868	0.00415	868	-0.00191646	868	-0.00187		867	0.00997	867	0.00690963	867	-0.00301
869	0.00305	869	-0.00275108	869	-0.00158		868	0.01073	868	0.00666891	868	-0.00316
870	0.00195	870	-0.00358571	870	-0.0011		869	0.01148	869	0.0064282	869	-0.00311
871	0.00105	871	-0.00422034	871	-0.000515		870	0.01224	870	0.00628748	870	-0.00296
872	5.25e-05	872	-0.00495496	872	0.00017		871	0.0128	871	0.00604677	871	-0.00281
873	-0.00074625	873	-0.00548959	873	0.000955		872	0.01306	872	0.00590606	872	-0.00276
874	-0.00164	874	-0.00612422	874	0.00174		873	0.01312	873	0.00576534	873	-0.00261
875	-0.00254	875	-0.00675884	875	0.00242		874	0.01287	874	0.00562463	874	-0.00246
876	-0.00354	876	-0.00749347	876	0.00311		875	0.01243	875	0.00528391	875	-0.00221
877	-0.00444	877	-0.0081281	877	0.00369		876	0.01169	876	0.0050432	876	-0.00186
878	-0.00524	878	-0.00866272	878	0.00408		877	0.01075	877	0.00470248	877	-0.00151
879	-0.00574	879	-0.00889735	879	0.00436		878	0.0096	878	0.00426177	878	-0.00117
880	-0.00594	880	-0.00883197	880	0.00455		879	0.00836	879	0.00392105	879	-0.000716253
881	-0.00614	881	-0.0087666	881	0.00463		880	0.00692	880	0.00348034	880	-0.00026694
882	-0.00624	882	-0.00860123	882	0.00472		881	0.00548	881	0.00283962	881	8.23741e-05
883	-0.00623	883	-0.00833585	883	0.0048		882	0.00393	882	0.00199891	882	0.000331688
884	-0.00613	884	-0.00797048	884	0.00489		883	0.00229	883	0.0010582	883	0.000681002
885	-0.00593	885	-0.00750511	885	0.00487		884	0.000750324	884	0.000217481	884	0.000830315
886	-0.00563	886	-0.00693973	886	0.00456		885	-0.00089198	885	-0.000423234	885	0.00108
887	-0.00543	887	-0.00647436	887	0.00414		886	-0.00243	886	-0.00106395	886	0.00133
888	-0.00543	888	-0.00620899	888	0.00363		887	-0.00388	887	-0.00190466	887	0.00148
889	-0.00533	889	-0.00584361	889	0.00321		888	-0.00532	888	-0.00284538	888	0.00163
890	-0.00523	890	-0.00547824	890	0.0029		889	-0.00666	889	-0.00388609	889	0.00168
891	-0.00492	891	-0.00491287	891	0.00268		890	-0.0078	890	-0.00482681	890	0.00173
892	-0.00462	892	-0.00434749	892	0.00247		891	-0.00865	891	-0.00566752	891	0.00178
893	-0.00432	893	-0.00378212	893	0.00225		892	-0.00919	892	-0.00640824	892	0.00202
894	-0.00422	894	-0.00341674	894	0.00194		893	-0.00953	893	-0.00704895	893	0.00227
895	-0.00412	895	-0.00305137	895	0.00152		894	-0.00977	894	-0.00758966	894	0.00262
896	-0.00382	896	-0.002486	896	0.00111		895	-0.00992	895	-0.00823038	895	0.00287
897	-0.00352	897	-0.00192062	897	0.000695		896	-0.00996	896	-0.00867109	896	0.00302
898	-0.00332	898	-0.00145525	898	0.00038		897	-0.0098	897	-0.00911181	897	0.00297
899	-0.00321	899	-0.00108988	899	0.000165		898	-0.00944	898	-0.00955252	898	0.00292
900	-0.00331	900	-0.000924503	900	-5e-05		899	-0.00888	899	-0.0100932	899	0.00277
901	-0.00321	901	-0.00055913	901	-0.000165		900	-0.00823	900	-0.010834	900	0.00272
902	-0.00281	902	0.000106244	902	-0.00018		901	-0.00747	901	-0.0115747	901	0.00257
903	-0.00231	903	0.000871617	903	-0.000295		902	-0.00661	902	-0.0121154	902	0.00262
904	-0.00161	904	0.00183699	904	-0.00031		903	-0.00565	903	-0.0126561	903	0.00267
905	-0.00111	905	0.00260236	905	-0.000325		904	-0.0047	904	-0.0130968	904	0.00272
906	-0.000705	906	0.002823	906	-0.00024		905	-0.00374	905	-0.0136375	905	0.00277
907	-0.00050375	907	0.00268159	907	-0.000355		906	-0.00268	906	-0.0141782	906	0.00272
908	-0.0003025	908	0.00254018	908	-0.00027		907	-0.00162	907	-0.014719	907	0.00256
909	-0.00010125	909	0.00239877	909	-0.000185		908	-0.000564962	908	-0.0152597	908	0.00251
910	-2.84217e-13	910	0.00215736	910	-3.97904e-13		909	0.000354302	909	-0.0157004	909	0.00237
911	-0.0001225	911	0.00181594	911	-6.83333e-05		910	0.00257	910	-0.0153001	910	0.00282
912	0.000255	912	0.00197453	912	-0.000436667		911	0.01099	911	-0.0107998	911	0.00667
913	0.00263	913	0.00413312	913	-0.00101		912	0.03651	912	0.00590054	912	0.02043
914	0.00931	914	0.0105917	914	-0.000673333		913	0.09323	913	0.0453009	913	0.05308
915	0.02319	915	0.0242503	915	0.00176		914	0.19175	914	0.115901	914	0.11233
916	0.04636	916	0.0472089	916	0.00779		915	0.33357	915	0.220001	915	0.19979
917	0.07914	917	0.0797675	917	0.01832		916	0.51129	916	0.353102	916	0.31114
918	0.12042	918	0.120826	918	0.03325		917	0.71331	917	0.506402	917	0.43839
919	0.1683	919	0.168485	919	0.05198		918	0.92813	918	0.671202	918	0.57344
920	0.22047	920	0.220443	920	0.07362		919	1.14805	919	0.841103	919	0.7105
921	0.27525	921	0.275002	921	0.09725		920	1.36897	920	1.0127	920	0.84655
922	0.33133	922	0.33086	922	0.12218		921	1.58869	921	1.184	921	0.9803
923	0.38811	923	0.387419	923	0.14801		922	1.8053	922	1.3533	922	1.11076
924	0.44478	924	0.443878	924	0.17424		923	2.01632	923	1.5183	923	1.23641
925	0.50086	925	0.499736	925	0.20077		924	2.21884	924	1.6769	924	1.35546
926	0.55564	926	0.554295	926	0.22741		925	2.40906	925	1.8263	925	1.46592
927	0.60792	927	0.606353	927	0.25364		926	2.58048	926	1.9619	926	1.56397
928	0.65579	928	0.654012	928	0.27897		927	2.7216	927	2.07531	927	1.64292
929	0.69667	929	0.694671	929	0.3023		928	2.81862	928	2.15611	928	1.69408
930	0.72755	930	0.725329	930	0.32203		929	2.86164	929	2.19611	929	1.71053
931	0.74633	931	0.743888	931	0.33666		930	2.84966	930	2.19371	930	1.69118
932	0.7526	932	0.749946	932	0.3456		931	2.79058	931	2.15371	931	1.64073
933	0.74758	933	0.744705	933	0.34853		932	2.6967	932	2.08521	932	1.56769
934	0.73346	934	0.730363	934	0.34616		933	2.57982	933	1.99741	933	1.48044
935	0.71254	935	0.709222	935	0.33939		934	2.44834	934	1.89711	934	1.38529
936	0.68681	936	0.683281	936	0.32932		935	2.30726	935	1.78871	935	1.28595
937	0.65779	937	0.654039	937	0.31655		936	2.15937	936	1.67461	936	1.1845
938	0.62637	938	0.622398	938	0.30189		937	2.00749	937	1.55721	937	1.08235
939	0.59305	939	0.588856	939	0.28562		938	1.85471	938	1.43881	938	0.98151
940	0.55862	940	0.554215	940	0.26815		939	1.70453	939	1.32231	939	0.88386
941	0.5238	941	0.519174	941	0.24998		940	1.55995	940	1.20981	940	0.79141
942	0.48958	942	0.484732	942	0.23161		941	1.42297	941	1.10331	941	0.70557
943	0.45636	943	0.451291	943	0.21354		942	1.29469	942	1.00351	942	0.62672
944	0.42473	944	0.419449	944	0.19608		943	1.17531	943	0.91081	943	0.55477
945	0.39471	945	0.389208	945	0.17951		944	1.06463	944	0.82491	944	0.48922
946	0.36649	946	0.360767	946	0.16384		945	0.96235	945	0.745711	945	0.42968
947	0.34007	947	0.334125	947	0.14917		946	0.86837	946	0.672811	946	0.37573
948	0.31534	948	0.309184	948	0.1354		947	0.78249	947	0.606311	947	0.32728
949	0.29242	949	0.286042	949	0.12253		948	0.70451	948	0.545912	948	0.28394
950	0.2711	950	0.264501	950	0.11077		949	0.63402	949	0.491312	949	0.24549
951	0.25138	951	0.24456	951	0.1		950	0.57034	950	0.442012	950	0.21144
952	0.23295	952	0.225918	952	0.09033		951	0.51306	951	0.397513	951	0.1813
953	0.21603	953	0.208777	953	0.08156		952	0.46158	952	0.357413	952	0.15435
954	0.20031	954	0.192835	954	0.07369		953	0.4154	953	0.321213	953	0.1304
955	0.18579	955	0.178094	955	0.06662		954	0.37412	954	0.288914	954	0.10906
956	0.17236	956	0.164452	956	0.06016		955	0.33744	955	0.260014	955	0.09011
957	0.15994	957	0.151811	957	0.05419		956	0.30486	956	0.234214	956	0.07336
958	0.14832	958	0.13997	958	0.04872		957	0.27588	957	0.211114	957	0.05861
959	0.1374	959	0.128828	959	0.04385		958	0.2503	958	0.190515	958	0.04547
960	0.12707	960	0.118287	960	0.03938		959	0.22772	959	0.172115	959	0.03372
961	0.11755	961	0.108545	961	0.03541		960	0.20784	960	0.155815	960	0.02347
962	0.10863	962	0.099404	962	0.03175		961	0.19036	961	0.141316	961	0.01443
963	0.10031	963	0.0908626	963	0.02838		962	0.17498	962	0.128416	962	0.00678
964	0.09248	964	0.0828212	964	0.02521		963	0.16139	963	0.117016	963	0.000232629
965	0.08526	965	0.0753798	965	0.02224		964	0.14941	964	0.106917	964	-0.00541
966	0.07854	966	0.0684383	966	0.01947		965	0.13903	965	0.0978169	965	-0.01036
967	0.07222	967	0.0618969	967	0.0169		966	0.12985	966	0.0898172	966	-0.01471
968	0.0664	968	0.0558555	968	0.01454		967	0.12187	967	0.0828176	967	-0.01856
969	0.06087	969	0.0501141	969	0.01237		968	0.11469	968	0.0767179	968	-0.0218
970	0.05595	970	0.0449727	970	0.0103		969	0.10821	969	0.0714182	969	-0.02445
971	0.05143	971	0.0402313	971	0.00863		970	0.10233	970	0.0668185	970	-0.0264
972	0.04721	972	0.0357899	972	0.00716		971	0.09695	971	0.0627188	971	-0.02804
973	0.04358	973	0.0319485	973	0.0059		972	0.09197	972	0.0592191	972	-0.02919
974	0.04026	974	0.0284071	974	0.00493		973	0.08739	973	0.0562194	973	-0.02994
975	0.03724	975	0.0251656	975	0.00406		974	0.08311	974	0.0535197	974	-0.03038
976	0.03452	976	0.0222242	976	0.00339		975	0.07893	975	0.05112	975	-0.03033
977	0.03209	977	0.0195828	977	0.00292		976	0.07484	976	0.0492203	976	-0.02988
978	0.02987	978	0.0171414	978	0.00275		977	0.07106	977	0.0477206	977	-0.02922
979	0.02785	979	0.0149	979	0.00279		978	0.06728	978	0.046521	978	-0.02847
980	0.02583	980	0.0126586	980	0.00312		979	0.0636	979	0.0455213	979	-0.02762
981	0.0239	981	0.0105172	981	0.00345		980	0.06002	980	0.0447216	980	-0.02667
982	0.02198	982	0.00837576	982	0.00378		981	0.05644	981	0.0441219	981	-0.02531
983	0.02026	983	0.00643435	983	0.00401		982	0.05296	982	0.0437222	982	-0.02386
984	0.01864	984	0.00459294	984	0.00424		983	0.04968	983	0.0434225	983	-0.02221
985	0.01721	985	0.00295153	985	0.00458		984	0.0467	984	0.0433228	984	-0.02045
986	0.01589	986	0.00158912	986	0.00481		985	0.04392	985	0.0432231	985	-0.0187
987	0.01477	987	0.00124104	987	0.00524		986	0.04154	986	0.0432234	986	-0.01685
988	0.01365	988	0.000892954	988	0.00557		987	0.03936	987	0.0432237	987	-0.01509
989	0.01252	989	0.000544872	989	0.0059		988	0.03758	988	0.043324	988	-0.01324
990	0.0114	990	0.000196791	990	0.00613		989	0.0359	989	0.0435244	989	-0.01169
991	0.01018	991	-0.000251291	991	0.00627		990	0.03451	990	0.0437247	990	-0.01013
992	0.00896	992	-0.000699372	992	0.0064		991	0.03333	991	0.043825	991	-0.00868
993	0.00773	993	-0.00114745	993	0.00653		992	0.03255	992	0.0437253	992	-0.00723
994	0.00651	994	-0.00159553	994	0.00656		993	0.03217	993	0.0436256	993	-0.00598
995	0.00539	995	-0.00194362	995	0.00659		994	0.03209	994	0.0434259	994	-0.00472
996	0.00447	996	-0.0020917	996	0.00652		995	0.03231	995	0.0433262	995	-0.00367
997	0.00344	997	-0.00233978	997	0.00636		996	0.03283	996	0.0430265	996	-0.00262
998	0.00252	998	-0.00248786	998	0.00619		997	0.03345	997	0.0426268	997	-0.00176
999	0.0015	999	-0.00273594	999	0.00602		998	0.03417	998	0.0422271	998	-0.000909965
1000	0.000475	1000	-0.00298402	1000	0.00575		999	0.03489	999	0.0417274	999	-0.000156896
1001	-0.0004475	1001	-0.00313211	1001	0.00558		1000	0.03581	1000	0.0412278	1000	0.000496173
1002	-0.00127	1002	-0.00318019	1002	0.00541		1001	0.03683	1001	0.0407281	1001	0.00105
1003	-0.00199	1003	-0.003281	1003	0.00515		1002	0.03795	1002	0.0401284	1002	0.0016
1004	-0.00251	1004	-0.00370982	1004	0.00498		1003	0.03927	1003	0.0394287	1003	0.00216
1005	-0.00304	1005	-0.00413863	1005	0.00471		1004	0.04058	1004	0.038629	1004	0.00281
1006	-0.00356	1006	-0.00456745	1006	0.00424		1005	0.0419	1005	0.0378293	1005	0.00346
1007	-0.00408	1007	-0.00499627	1007	0.00347		1006	0.04312	1006	0.0371296	1006	0.00401
1008	-0.0045	1008	-0.00532508	1008	0.0026		1007	0.04414	1007	0.0362299	1007	0.00467
1009	-0.00473	1009	-0.0054539	1009	0.00174		1008	0.04516	1008	0.0354302	1008	0.00522
1010	-0.00495	1010	-0.00558271	1010	0.000966667		1009	0.04608	1009	0.0345305	1009	0.00577
1011	-0.00507	1011	-0.00561153	1011	0.000398333		1010	0.0469	1010	0.0337308	1010	0.00633
1012	-0.00519	1012	-0.00564034	1012	-0.00017		1011	0.04762	1011	0.0329312	1011	0.00688
1013	-0.00512	1013	-0.00546916	1013	-0.000538333		1012	0.04824	1012	0.0321315	1012	0.00743
1014	-0.00514	1014	-0.00539798	1014	-0.000906667		1013	0.04846	1013	0.0311318	1013	0.00779
1015	-0.00526	1015	-0.00542679	1015	-0.00127		1014	0.04848	1014	0.0300321	1014	0.00794
1016	-0.00538	1016	-0.00545561	1016	-0.00164		1015	0.0482	1015	0.0287324	1015	0.00799
1017	-0.00541	1017	-0.00538442	1017	-0.00201		1016	0.04772	1016	0.0275327	1016	0.00805
1018	-0.00543	1018	-0.00531324	1018	-0.00228		1017	0.04683	1017	0.026533	1017	0.0082
1019	-0.00535	1019	-0.00514206	1019	-0.00255		1018	0.04585	1018	0.0255333	1018	0.00845
1020	-0.00517	1020	-0.00487087	1020	-0.00272		1019	0.04467	1019	0.0245336	1019	0.0087
1021	-0.0048	1021	-0.00439969	1021	-0.00268		1020	0.04329	1020	0.0235339	1020	0.00876
1022	-0.00422	1022	-0.0037285	1022	-0.00275		1021	0.04171	1021	0.0225342	1021	0.00881
1023	-0.00364	1023	-0.00305732	1023	-0.00272		1022	0.03993	1022	0.0216346	1022	0.00876
1024	-0.00296	1024	-0.00228614	1024	-0.00259		1023	0.03795	1023	0.0207349	1023	0.00872
1025	-0.00239	1025	-0.00161495	1025	-0.00246		1024	0.03587	1024	0.0197352	1024	0.00847
1026	-0.00191	1026	-0.00104377	1026	-0.00213		1025	0.03359	1025	0.0186355	1025	0.00822
1027	-0.00143	1027	-0.000472583	1027	-0.00159		1026	0.03131	1026	0.0176358	1026	0.00798
1028	-0.00105	1028	-1.3992e-06	1028	-0.00106		1027	0.02893	1027	0.0166361	1027	0.00783
1029	-0.0005775	1029	0.000569785	1029	-0.000531667		1028	0.02665	1028	0.0156364	1028	0.00788
1030	1.98952e-13	1030	0.00124097	1030	1.98952e-13		1029	0.02447	1029	0.0147367	1029	0.00814
1031	0.0006625	1031	0.00201215	1031	0.00014125		1030	0.02229	1030	0.013837	1030	0.00839
1032	0.00123	1032	0.00268334	1032	0.0002825		1031	0.0202	1031	0.0128373	1031	0.00864
1033	0.00149	1033	0.00305452	1033	0.00042375		1032	0.01822	1032	0.0117376	1032	0.00869
1034	0.00155	1034	0.00322571	1034	0.000665		1033	0.01614	1033	0.010638	1033	0.00855
1035	0.00131	1035	0.00309689	1035	0.00080625		1034	0.01426	1034	0.00953827	1034	0.0083
1036	0.000975	1036	0.00286807	1036	0.00115		1035	0.01258	1035	0.00843858	1035	0.00805
1037	0.0006375	1037	0.00263926	1037	0.00169		1036	0.0112	1036	0.00733888	1036	0.00791
1038	0.0002	1038	0.00231044	1038	0.00233		1037	0.01002	1037	0.00643919	1037	0.00776
1039	-0.0003375	1039	0.00184478	1039	0.00307		1038	0.00904	1038	0.0055395	1038	0.00761
1040	-0.000975	1040	0.00102257	1040	0.00381		1039	0.00816	1039	0.00473981	1039	0.00757
1041	-0.00151	1041	0.000300363	1041	0.00445		1040	0.00748	1040	0.00394012	1040	0.00752
1042	-0.00195	1042	-0.000321844	1042	0.00499		1041	0.0071	1041	0.00304043	1041	0.00757
1043	-0.00239	1043	-0.000944051	1043	0.00544		1042	0.00692	1042	0.00214074	1042	0.00753
1044	-0.00282	1044	-0.00156626	1044	0.00588		1043	0.00704	1043	0.00124105	1043	0.00738
1045	-0.00316	1045	-0.00208847	1045	0.00642		1044	0.00735	1044	0.000541358	1044	0.00703
1046	-0.0036	1046	-0.00271067	1046	0.00696		1045	0.00777	1045	-5.83324e-05	1045	0.00658
1047	-0.00394	1047	-0.00323288	1047	0.0076		1046	0.00839	1046	-0.000558023	1046	0.00624
1048	-0.00417	1048	-0.00365509	1048	0.00824		1047	0.00891	1047	-0.00115771	1047	0.00599
1049	-0.00431	1049	-0.0039773	1049	0.00888		1048	0.00963	1048	-0.0016574	1048	0.00574
1050	-0.00435	1050	-0.0041995	1050	0.00962		1049	0.01035	1049	-0.0020571	1049	0.0054
1051	-0.00429	1051	-0.00432171	1051	0.01017		1050	0.01117	1050	-0.00255679	1050	0.00515
1052	-0.00442	1052	-0.00464392	1052	0.01061		1051	0.01199	1051	-0.00305648	1051	0.0048
1053	-0.00446	1053	-0.00486612	1053	0.01095		1052	0.01271	1052	-0.00365617	1052	0.00446
1054	-0.0045	1054	-0.00508833	1054	0.01109		1053	0.01333	1053	-0.00425586	1053	0.00411
1055	-0.00444	1055	-0.00521054	1055	0.01113		1054	0.01385	1054	-0.00485555	1054	0.00366
1056	-0.00427	1056	-0.00523275	1056	0.01117		1055	0.01427	1055	-0.00535524	1055	0.00331
1057	-0.00391	1057	-0.00505495	1057	0.01111		1056	0.01459	1056	-0.00585493	1056	0.00297
1058	-0.00355	1058	-0.00487716	1058	0.01095		1057	0.01461	1057	-0.00635462	1057	0.00272
1059	-0.00319	1059	-0.00469937	1059	0.0108		1058	0.01452	1058	-0.00695431	1058	0.00257
1060	-0.00282	1060	-0.00452158	1060	0.01044		1059	0.01459	1059	-0.007554	1059	0.00268
1061	-0.00266	1061	-0.00454378	1061	0.01008		1060	0.01456	1060	-0.00783697	1060	0.00279
1062	-0.0024	1062	-0.00446599	1062	0.00962		1061	0.01432	1061	-0.00811993	1061	0.0028
1063	-0.00204	1063	-0.0042882	1063	0.00906		1062	0.01389	1062	-0.0084029	1062	0.0027
1064	-0.00157	1064	-0.0040104	1064	0.0085		1063	0.01325	1063	-0.00868587	1063	0.00251
1065	-0.0009125	1065	-0.00353261	1065	0.00784		1064	0.01232	1064	-0.00906883	1064	0.00242
1066	-0.00025	1066	-0.00305482	1066	0.00708		1065	0.01118	1065	-0.0094518	1065	0.00253
1067	0.0004125	1067	-0.00257703	1067	0.00623		1066	0.00995	1066	-0.00973476	1066	0.00253
1068	0.000975	1068	-0.00219923	1068	0.00527		1067	0.00861	1067	-0.0100177	1067	0.00264
1069	0.00144	1069	-0.00192144	1069	0.00441		1068	0.00728	1068	-0.0103007	1068	0.00275
1070	0.0019	1070	-0.00164365	1070	0.00365		1069	0.00595	1069	-0.0104837	1069	0.00276
1071	0.00236	1071	-0.00136586	1071	0.00289		1070	0.00441	1070	-0.0105666	1070	0.00286
1072	0.00272	1072	-0.00118806	1072	0.00223		1071	0.00298	1071	-0.0105496	1071	0.00277
1073	0.00319	1073	-0.000910271	1073	0.00167		1072	0.00144	1072	-0.0104326	1072	0.00268
1074	0.00365	1074	-0.000632478	1074	0.00112		1073	-9.24365e-05	1073	-0.0101155	1073	0.00249
1075	0.00401	1075	-0.000454685	1075	0.00065625		1074	-0.00183	1074	-0.00969849	1074	0.00229
1076	0.00437	1076	-0.000276893	1076	0.0001975		1075	-0.00346	1075	-0.00928145	1075	0.0022
1077	0.00464	1077	-5.51382e-05	1077	-0.00016125		1076	-0.0051	1076	-0.00886442	1076	0.00221
1078	0.0049	1078	0.000251505	1078	-0.00062		1077	-0.00663	1077	-0.00844739	1077	0.00221
1079	0.00516	1079	0.000558149	1079	-0.00097875		1078	-0.00786	1078	-0.00803035	1078	0.00232
1080	0.00532	1080	0.000764792	1080	-0.00134		1079	-0.009	1079	-0.00761332	1079	0.00213
1081	0.00549	1081	0.000971435	1081	-0.0016		1080	-0.00993	1080	-0.00709628	1080	0.00194
1082	0.00565	1082	0.00117808	1082	-0.00165		1081	-0.01067	1081	-0.00657925	1081	0.00154
1083	0.00581	1083	0.00138472	1083	-0.00171		1082	-0.0112	1082	-0.00606221	1082	0.00125
1084	0.00597	1084	0.00159137	1084	-0.00177		1083	-0.01164	1083	-0.00554518	1083	0.00085916
1085	0.00624	1085	0.00189801	1085	-0.00183		1084	-0.01177	1084	-0.00512815	1084	0.000566559
1086	0.0063	1086	0.00200465	1086	-0.00189		1085	-0.01181	1085	-0.00481111	1085	0.000173959
1087	0.00616	1087	0.0019113	1087	-0.00185		1086	-0.01144	1086	-0.00429408	1086	-0.000218641
1088	0.00592	1088	0.00171794	1088	-0.00171		1087	-0.01098	1087	-0.00387704	1087	-0.000711241
1089	0.00579	1089	0.00162458	1089	-0.00147		1088	-0.01021	1088	-0.00346001	1088	-0.0012
1090	0.00575	1090	0.00163123	1090	-0.00112		1089	-0.00924	1089	-0.00324297	1089	-0.0017
1091	0.00571	1091	0.00163787	1091	-0.00078375		1090	-0.00808	1090	-0.00312594	1090	-0.00229
1092	0.00567	1092	0.00164451	1092	-0.0002425		1091	-0.00681	1091	-0.00300891	1091	-0.00278
1093	0.00544	1093	0.00145116	1093	0.00019875		1092	-0.00545	1092	-0.00269187	1092	-0.00317
1094	0.005	1094	0.0010578	1094	0.00064		1093	-0.00398	1093	-0.00217484	1093	-0.00347
1095	0.00446	1095	0.000564442	1095	0.00108		1094	-0.00242	1094	-0.0013578	1094	-0.00376
1096	0.00382	1096	-2.89144e-05	1096	0.00152		1095	-0.000850792	1095	-0.000540769	1095	-0.00395
1097	0.00339	1097	-0.000422271	1097	0.00196		1096	0.000814737	1096	7.62656e-05	1096	-0.00424
1098	0.00295	1098	-0.000815628	1098	0.00261		1097	0.00228	1097	0.0005933	1097	-0.00444
1099	0.00261	1099	-0.00110898	1099	0.00325		1098	0.00375	1098	0.00111033	1098	-0.00453
1100	0.00237	1100	-0.00130234	1100	0.00359		1099	0.00511	1099	0.00172737	1099	-0.00442
1101	0.00214	1101	-0.0014957	1101	0.00383		1100	0.00628	1100	0.0023444	1100	-0.00432
1102	0.0019	1102	-0.00168905	1102	0.00377		1101	0.00724	1101	0.00306144	1101	-0.00411
1103	0.00176	1103	-0.00178241	1103	0.00361		1102	0.00801	1102	0.00377847	1102	-0.0039
1104	0.00152	1104	-0.00197577	1104	0.00345		1103	0.00837	1103	0.00449551	1103	-0.00369
1105	0.00119	1105	-0.00226912	1105	0.00319		1104	0.00864	1104	0.00511254	1104	-0.00349
1106	0.00075	1106	-0.00266248	1106	0.00284		1105	0.0087	1105	0.00562957	1105	-0.00338
1107	0.0005125	1107	-0.00285584	1107	0.00228		1106	0.00867	1106	0.00614661	1106	-0.00337
1108	0.000275	1108	-0.00304919	1108	0.00172		1107	0.00844	1107	0.00666364	1107	-0.00326
1109	0.0001375	1109	-0.00314255	1109	0.00095875		1108	0.008	1108	0.00708068	1108	-0.00316
1110	-5.11591e-13	1110	-0.00323591	1110	4.83169e-13		1109	0.00727	1109	0.00729771	1109	-0.00295
1111	-0.000345	1111	-0.00352926	1111	-0.000716667		1110	0.00633	1110	0.00761475	1110	-0.00284
1112	-0.00059	1112	-0.00372262	1112	-0.00193		1111	0.0053	1111	0.00803178	1111	-0.00263
1113	0.000665	1113	-0.00241598	1113	-0.00335		1112	0.00406	1112	0.00844881	1112	-0.00243
1114	0.00572	1114	0.0024754	1114	-0.00417		1113	0.00283	1113	0.00886585	1113	-0.00232
1115	0.01738	1115	0.0139182	1115	-0.00288		1114	0.00149	1114	0.00928288	1114	-0.00221
1116	0.03743	1116	0.033761	1116	0.002		1115	5.97935e-05	1115	0.00949992	1115	-0.0021
1117	0.06669	1117	0.0628038	1117	0.01128		1116	-0.00137	1116	0.00961695	1116	-0.0019
1118	0.10424	1118	0.100147	1118	0.02497		1117	-0.00271	1117	0.00963399	1117	-0.00189
1119	0.1479	1119	0.143589	1119	0.04265		1118	-0.00414	1118	0.00975102	1118	-0.00178
1120	0.19585	1120	0.191332	1120	0.06313		1119	-0.00548	1119	0.00986805	1119	-0.00157
1121	0.24621	1121	0.241475	1121	0.08572		1120	-0.00691	1120	0.00998509	1120	-0.00137
1122	0.29786	1122	0.292918	1122	0.1096		1121	-0.00815	1121	0.0102021	1121	-0.00126
1123	0.35012	1123	0.344961	1123	0.13438		1122	-0.00928	1122	0.0103192	1122	-0.00125
1124	0.40237	1124	0.397003	1124	0.15987		1123	-0.01032	1123	0.0102362	1123	-0.00124
1125	0.45433	1125	0.448746	1125	0.18585		1124	-0.01105	1124	0.00995323	1124	-0.00114
1126	0.50508	1126	0.499289	1126	0.21193		1125	-0.01168	1125	0.00957026	1125	-0.000930044
1127	0.55384	1127	0.547832	1127	0.23792		1126	-0.01222	1126	0.00908729	1126	-0.000522644
1128	0.59879	1128	0.592575	1128	0.2632		1127	-0.01265	1127	0.00880433	1127	-0.000115244
1129	0.63735	1129	0.630917	1129	0.28678		1128	-0.01289	1128	0.00852136	1128	0.000192156
1130	0.6668	1130	0.66016	1130	0.30707		1129	-0.01292	1129	0.0083384	1129	0.000399556
1131	0.68516	1131	0.678303	1131	0.32255		1130	-0.01256	1130	0.00815543	1130	0.000606956
1132	0.69201	1132	0.684946	1132	0.33233		1131	-0.01199	1131	0.00817247	1131	0.000814356
1133	0.68807	1133	0.680789	1133	0.33632		1132	-0.01113	1132	0.0081895	1132	0.00102
1134	0.67542	1134	0.667932	1134	0.3352		1133	-0.01006	1133	0.00820653	1133	0.00133
1135	0.65628	1135	0.648574	1135	0.32968		1134	-0.0089	1134	0.00832357	1134	0.00164
1136	0.63233	1136	0.624417	1136	0.32107		1135	-0.00753	1135	0.0084406	1135	0.00174
1137	0.60509	1137	0.59696	1137	0.30995		1136	-0.00606	1136	0.00865764	1136	0.00195
1138	0.57544	1138	0.567103	1138	0.29683		1137	-0.0046	1137	0.00877467	1137	0.00216
1139	0.5441	1139	0.535546	1139	0.28232		1138	-0.00303	1138	0.00899171	1138	0.00237
1140	0.51175	1140	0.502988	1140	0.2669		1139	-0.00147	1139	0.00930874	1139	0.00267
1141	0.47921	1141	0.470231	1141	0.25078		1140	9.80257e-05	1140	0.00962577	1140	0.00288
1142	0.44716	1142	0.437974	1142	0.23457		1141	0.00166	1141	0.0100428	1141	0.00279
1143	0.41602	1143	0.406617	1143	0.21855		1142	0.00313	1142	0.0103598	1142	0.0027
1144	0.38627	1144	0.37666	1144	0.20293		1143	0.00449	1143	0.0104769	1143	0.0024
1145	0.35793	1145	0.348102	1145	0.18792		1144	0.00586	1144	0.0102939	1144	0.00211
1146	0.33108	1146	0.321045	1146	0.1738		1145	0.00693	1145	0.0100109	1145	0.00192
1147	0.30584	1147	0.295588	1147	0.16048		1146	0.00789	1146	0.00962798	1146	0.00163
1148	0.28219	1148	0.271731	1148	0.14817		1147	0.00846	1147	0.00934501	1147	0.00133
1149	0.26025	1149	0.249574	1149	0.13705		1148	0.00892	1148	0.00906205	1148	0.00114
1150	0.2401	1150	0.229216	1150	0.12693		1149	0.00909	1149	0.00877908	1149	0.000947554
1151	0.22156	1151	0.210459	1151	0.11772		1150	0.00915	1150	0.00839612	1150	0.000854954
1152	0.20441	1152	0.193102	1152	0.1091		1151	0.00902	1151	0.00801315	1151	0.000762354
1153	0.18847	1153	0.176945	1153	0.10128		1152	0.00878	1152	0.00763019	1152	0.000569754
1154	0.17382	1154	0.162088	1154	0.09397		1153	0.00825	1153	0.00724722	1153	0.000277154
1155	0.16008	1155	0.14813	1155	0.08735		1154	0.00762	1154	0.00666425	1154	-1.54462e-05
1156	0.14733	1156	0.135173	1156	0.08123		1155	0.00678	1155	0.00598129	1155	-0.000308046
1157	0.13559	1157	0.123216	1157	0.07542		1156	0.00575	1156	0.00529832	1156	-0.000500646
1158	0.12474	1158	0.112159	1158	0.0701		1157	0.00471	1157	0.00471536	1157	-0.000593246
1159	0.1149	1159	0.102102	1159	0.06498		1158	0.00358	1158	0.00433239	1158	-0.000685846
1160	0.10585	1160	0.0928445	1160	0.06037		1159	0.00204	1159	0.00404943	1159	-0.000778447
1161	0.09751	1161	0.0842873	1161	0.05595		1160	0.000408611	1160	0.00396646	1160	-0.000971047
1162	0.08976	1162	0.0763301	1162	0.05193		1161	-0.00133	1161	0.0036835	1161	-0.00106
1163	0.08252	1163	0.0688729	1163	0.04812		1162	-0.00306	1162	0.00330053	1162	-0.00126
1164	0.07587	1164	0.0620157	1164	0.0445		1163	-0.00469	1163	0.00271756	1163	-0.00135
1165	0.06963	1165	0.0555585	1165	0.04108		1164	-0.00623	1164	0.0022346	1164	-0.00144
1166	0.06398	1166	0.0497013	1166	0.03787		1165	-0.00766	1165	0.00175163	1165	-0.00153
1167	0.05874	1167	0.0442441	1167	0.03495		1166	-0.0089	1166	0.00136867	1166	-0.00153
1168	0.05399	1168	0.0392869	1168	0.03233		1167	-0.01013	1167	0.0010857	1167	-0.00162
1169	0.04965	1169	0.0347297	1169	0.03002		1168	-0.01127	1168	0.000802735	1168	-0.00161
1170	0.0458	1170	0.0306725	1170	0.0277		1169	-0.0122	1169	0.000519769	1169	-0.0017
1171	0.04236	1171	0.0270153	1171	0.02568		1170	-0.01304	1170	0.000336804	1170	-0.0017
1172	0.03941	1172	0.0238581	1172	0.02367		1171	-0.01367	1171	5.38381e-05	1171	-0.00179
1173	0.03666	1173	0.020901	1173	0.02175		1172	-0.01411	1172	-0.000229128	1172	-0.00178
1174	0.03422	1174	0.0182438	1174	0.02013		1173	-0.01434	1173	-0.000512093	1173	-0.00177
1175	0.03207	1175	0.0158866	1175	0.01852		1174	-0.01437	1174	-0.000795059	1174	-0.00157
1176	0.03023	1176	0.0138294	1176	0.017		1175	-0.01401	1175	-0.00107802	1175	-0.00136
1177	0.02878	1177	0.0121722	1177	0.01558		1176	-0.01344	1176	-0.00146099	1176	-0.00105
1178	0.02764	1178	0.010815	1178	0.01407		1177	-0.01258	1177	-0.00184396	1177	-0.000745248
1179	0.02659	1179	0.00955779	1179	0.01235		1178	-0.01151	1178	-0.00212692	1178	-0.000537848
1180	0.02575	1180	0.00850059	1180	0.01063		1179	-0.01035	1179	-0.00240989	1179	-0.000230448
1181	0.0249	1181	0.0074434	1181	0.00892		1180	-0.00908	1180	-0.00279285	1180	-0.000123048
1182	0.02416	1182	0.00648621	1182	0.0072		1181	-0.00782	1181	-0.00327582	1181	8.43517e-05
1183	0.02351	1183	0.00562901	1183	0.00548		1182	-0.00635	1182	-0.00375878	1182	0.000391752
1184	0.02317	1184	0.00507182	1184	0.00377		1183	-0.00478	1183	-0.00434175	1183	0.000599152
1185	0.02282	1185	0.00451462	1185	0.00215		1184	-0.00312	1184	-0.00492472	1184	0.000906551
1186	0.02258	1186	0.00405743	1186	0.000533333		1185	-0.00135	1185	-0.00530768	1185	0.00111
1187	0.02213	1187	0.00340024	1187	-0.000983333		1186	0.000412373	1186	-0.00569065	1186	0.00142
1188	0.02169	1188	0.00274304	1188	-0.0023		1187	0.00228	1187	-0.00597361	1187	0.00173
1189	0.02124	1189	0.00208585	1189	-0.00362		1188	0.00404	1188	-0.00625658	1188	0.00194
1190	0.0208	1190	0.00142865	1190	-0.00473		1189	0.00561	1189	-0.00673954	1189	0.00214
1191	0.02045	1191	0.00087146	1191	-0.00555		1190	0.00717	1190	-0.00712251	1190	0.00225
1192	0.02011	1192	0.000314266	1192	-0.00627		1191	0.00854	1191	-0.00750548	1191	0.00226
1193	0.01976	1193	-0.000242928	1193	-0.00678		1192	0.00981	1192	-0.00778844	1192	0.00217
1194	0.01932	1194	-0.000900122	1194	-0.0071		1193	0.01077	1193	-0.00797141	1193	0.00197
1195	0.01897	1195	-0.00120702	1195	-0.00722		1194	0.01164	1194	-0.00825437	1194	0.00178
1196	0.01873	1196	-0.000845131	1196	-0.00723		1195	0.0122	1195	-0.00843734	1195	0.00159
1197	0.01838	1197	-0.000583244	1197	-0.00725		1196	0.01257	1196	-0.0086203	1196	0.0014
1198	0.01804	1198	-0.000321356	1198	-0.00737		1197	0.01273	1197	-0.00870327	1197	0.0012
1199	0.01759	1199	-0.000159469	1199	-0.00748		1198	0.0126	1198	-0.00868624	1198	0.00101
1200	0.01715	1200	2.41837e-06	1200	-0.0075		1199	0.01226	1199	-0.0086692	1199	0.00081755
1201	0.0167	1201	0.000164306	1201	-0.00742		1200	0.01173	1200	-0.00885217	1200	0.00062495
1202	0.01626	1202	0.000326193	1202	-0.00733		1201	0.011	1201	-0.00903513	1201	0.00043235
1203	0.01591	1203	0.00058808	1203	-0.00715		1202	0.00996	1202	-0.0093181	1202	0.00033975
1204	0.01557	1204	0.000849968	1204	-0.00697		1203	0.00883	1203	-0.00960106	1203	0.00024715
1205	0.01522	1205	0.00111185	1205	-0.00688		1204	0.00749	1204	-0.00968403	1204	0.00015455
1206	0.01478	1206	0.00127374	1206	-0.0069		1205	0.00606	1205	-0.009667	1205	0.00016195
1207	0.01423	1207	0.00133563	1207	-0.00702		1206	0.00442	1206	-0.00964996	1206	6.93497e-05
1208	0.01379	1208	0.00149752	1208	-0.00703		1207	0.00299	1207	-0.00973293	1207	0.00017675
1209	0.01344	1209	0.0017594	1209	-0.00695		1208	0.00155	1208	-0.00981589	1208	0.00018415
1210	0.0131	1210	0.00202129	1210	-0.00667		1209	-2.34064e-05	1209	-0.00989886	1209	4.28841e-05
1211	0.01265	1211	0.00218318	1211	-0.00628		1210	-0.00070083	1210	-0.00958274	1210	0.000301619
1212	0.01211	1212	0.00224507	1212	-0.0058		1211	0.00312	1211	-0.00606663	1211	0.00366
1213	0.01146	1213	0.00220695	1213	-0.00532		1212	0.02034	1212	0.00774948	1212	0.01652
1214	0.01072	1214	0.00206884	1214	-0.00493		1213	0.06377	1213	0.0415656	1213	0.04778
1215	0.00997	1215	0.00193073	1215	-0.00465		1214	0.14409	1214	0.103782	1214	0.10504
1216	0.00923	1216	0.00179262	1216	-0.00447		1215	0.26501	1215	0.197098	1215	0.1902
1217	0.00848	1217	0.0016545	1217	-0.00408		1216	0.42153	1216	0.317914	1216	0.29905
1218	0.00784	1218	0.00161639	1218	-0.0035		1217	0.60306	1217	0.45843	1217	0.42391
1219	0.00729	1219	0.00167828	1219	-0.00292		1218	0.79878	1218	0.610346	1218	0.55677
1220	0.00665	1220	0.00164016	1220	-0.00223		1219	1.0004	1219	0.767262	1219	0.69183
1221	0.006	1221	0.00160205	1221	-0.00155		1220	1.20332	1220	0.925578	1220	0.82599
1222	0.00526	1222	0.00146394	1222	-0.000766667		1221	1.40525	1221	1.08339	1221	0.95785
1223	0.00431	1223	0.00112583	1223	-0.000183333		1222	1.60467	1222	1.23941	1222	1.08641
1224	0.00337	1224	0.000787714	1224	0.0001		1223	1.79929	1223	1.39173	1223	1.21037
1225	0.00252	1225	0.000549601	1225	0.000183333		1224	1.98662	1224	1.53824	1224	1.32802
1226	0.00178	1226	0.000411488	1226	0.000166667		1225	2.16364	1225	1.67646	1225	1.43728
1227	0.00123	1227	0.000473375	1227	5e-05		1226	2.32506	1226	1.80218	1226	1.53454
1228	0.00069	1228	0.000535263	1228	3.33333e-05		1227	2.46138	1227	1.90819	1227	1.6132
1229	0.000345	1229	0.00079715	1229	0.000116667		1228	2.56001	1228	1.98491	1228	1.66466
1230	-4.54747e-13	1230	0.00105904	1230	7.10543e-13		1229	2.61053	1229	2.02432	1229	1.68222
1231	-0.000325	1231	0.00142092	1231	9.25e-05		1230	2.61005	1230	2.02424	1230	1.66418
1232	-0.00055	1232	0.00188281	1232	-0.000115		1231	2.56397	1231	1.98876	1231	1.61544
1233	-0.000675	1233	0.0024447	1233	-0.0004225		1232	2.4833	1232	1.92587	1232	1.54389
1234	-0.0009	1234	0.00290659	1234	-0.00093		1233	2.37952	1233	1.84429	1233	1.45805
1235	-0.00102	1235	0.00346847	1235	-0.00164		1234	2.26134	1234	1.7509	1234	1.36441
1236	-0.00105	1236	0.00413036	1236	-0.00235		1235	2.13416	1235	1.64982	1235	1.26647
1237	-0.000875	1237	0.00499225	1237	-0.00305		1236	2.00089	1236	1.54364	1236	1.16613
1238	-0.0006	1238	0.00514842	1238	-0.00396		1237	1.86361	1237	1.43435	1237	1.06519
1239	-0.000225	1239	0.00489926	1239	-0.00487		1238	1.72503	1238	1.32407	1238	0.96535
1240	0.00025	1240	0.00475009	1240	-0.00588		1239	1.58815	1239	1.21548	1239	0.8687
1241	0.000825	1241	0.00470093	1241	-0.00688		1240	1.45568	1240	1.1106	1240	0.77746
1242	0.0016	1242	0.00485177	1242	-0.00779		1241	1.33	1241	1.01142	1241	0.69262
1243	0.00238	1243	0.00500261	1243	-0.0087		1242	1.21192	1242	0.918633	1242	0.61478
1244	0.00305	1244	0.00505345	1244	-0.00921		1243	1.10174	1243	0.832549	1243	0.54354
1245	0.00373	1245	0.00510428	1245	-0.00941		1244	0.99957	1244	0.752965	1244	0.4786
1246	0.0043	1246	0.00505512	1246	-0.00952		1245	0.90489	1245	0.679781	1245	0.41956
1247	0.00478	1247	0.00490596	1247	-0.00963		1246	0.81771	1246	0.612697	1246	0.36622
1248	0.00535	1248	0.0048568	1248	-0.00994		1247	0.73773	1247	0.551313	1247	0.31847
1249	0.00593	1249	0.00480764	1249	-0.01024		1248	0.66466	1248	0.49563	1248	0.27593
1250	0.0064	1250	0.00465847	1250	-0.01045		1249	0.59808	1249	0.445046	1249	0.23819
1251	0.00678	1251	0.00440931	1251	-0.01056		1250	0.5376	1250	0.399362	1250	0.20485
1252	0.00725	1252	0.00426015	1252	-0.01047		1251	0.48262	1251	0.358078	1251	0.17531
1253	0.00763	1253	0.00401099	1253	-0.01017		1252	0.43275	1252	0.320894	1252	0.14907
1254	0.0081	1254	0.00386183	1254	-0.00968		1253	0.38737	1253	0.28761	1253	0.12583
1255	0.00848	1255	0.00361266	1255	-0.00899		1254	0.34619	1254	0.257726	1254	0.10519
1256	0.00875	1256	0.0032635	1256	-0.0083		1255	0.30882	1255	0.231142	1255	0.08664
1257	0.00883	1257	0.00271434	1257	-0.0077		1256	0.27514	1256	0.207359	1256	0.0702
1258	0.0088	1258	0.00206518	1258	-0.00721		1257	0.24456	1257	0.186175	1257	0.05556
1259	0.00888	1259	0.00151602	1259	-0.00682		1258	0.21678	1258	0.167191	1258	0.04272
1260	0.00895	1260	0.000966855	1260	-0.00663		1259	0.19161	1259	0.150307	1259	0.03148
1261	0.00903	1261	0.000417693	1261	-0.00633		1260	0.16873	1260	0.135123	1260	0.02154
1262	0.0089	1262	-1.4087e-05	1262	-0.00584		1261	0.14795	1261	0.121639	1261	0.0129
1263	0.00868	1263	3.81495e-05	1263	-0.00535		1262	0.12937	1262	0.109655	1262	0.00526
1264	0.00825	1264	-0.000109614	1264	-0.00476		1263	0.1129	1263	0.0992713	1263	-0.00139
1265	0.00793	1265	-0.000157377	1265	-0.00416		1264	0.09822	1264	0.0902874	1264	-0.00723
1266	0.0076	1266	-0.000205141	1266	-0.00377		1265	0.08524	1265	0.0826035	1265	-0.01227
1267	0.00718	1267	-0.000352904	1267	-0.00338		1266	0.07386	1266	0.0760197	1266	-0.01641
1268	0.00675	1268	-0.000500668	1268	-0.00308		1267	0.06389	1267	0.0704358	1267	-0.01985
1269	0.00603	1269	-0.000948431	1269	-0.00269		1268	0.05541	1268	0.0656519	1268	-0.02259
1270	0.0052	1270	-0.00149619	1270	-0.0024		1269	0.04843	1269	0.061568	1269	-0.02473
1271	0.00428	1271	-0.00214396	1271	-0.00201		1270	0.04265	1270	0.0579841	1270	-0.02627
1272	0.00335	1272	-0.00279172	1272	-0.00152		1271	0.03798	1271	0.0548002	1271	-0.02742
1273	0.00252	1273	-0.00333949	1273	-0.0009225		1272	0.0343	1272	0.0521164	1272	-0.02806
1274	0.0016	1274	-0.00398725	1274	-0.00033		1273	0.03152	1273	0.0498325	1273	-0.0285
1275	0.000675	1275	-0.00463501	1275	0.0002625		1274	0.02964	1274	0.0478486	1274	-0.02864
1276	-0.00015	1276	-0.00518278	1276	0.000955		1275	0.02867	1275	0.0463647	1275	-0.02838
1277	-0.000875	1277	-0.00563054	1277	0.00165		1276	0.02829	1276	0.0451808	1276	-0.02782
1278	-0.0014	1278	-0.0058783	1278	0.00234		1277	0.02861	1277	0.0441969	1277	-0.02696
1279	-0.00193	1279	-0.00612607	1279	0.00303		1278	0.02933	1278	0.043413	1278	-0.0259
1280	-0.00245	1280	-0.00637383	1280	0.00363		1279	0.03046	1279	0.0427292	1279	-0.02465
1281	-0.00308	1281	-0.00672159	1281	0.00432		1280	0.03188	1280	0.0421453	1280	-0.02329
1282	-0.0037	1282	-0.00706936	1282	0.00481		1281	0.0336	1281	0.0416614	1281	-0.02213
1283	-0.00423	1283	-0.00731712	1283	0.0053		1282	0.03532	1282	0.0413775	1282	-0.02107
1284	-0.00455	1284	-0.00736488	1284	0.0057		1283	0.03715	1283	0.0410936	1283	-0.02011
1285	-0.00478	1285	-0.00731265	1285	0.00589		1284	0.03907	1284	0.0408097	1284	-0.01905
1286	-0.0048	1286	-0.00706041	1286	0.00608		1285	0.04089	1285	0.0407258	1285	-0.01799
1287	-0.00493	1287	-0.00690817	1287	0.00617		1286	0.04271	1286	0.040842	1286	-0.01683
1288	-0.00495	1288	-0.00665594	1288	0.00627		1287	0.04444	1287	0.0411581	1287	-0.01578
1289	-0.00508	1289	-0.0065037	1289	0.00636		1288	0.04606	1288	0.0415742	1288	-0.01462
1290	-0.0051	1290	-0.00625146	1290	0.00625		1289	0.04758	1289	0.0419903	1289	-0.01346
1291	-0.00513	1291	-0.00599923	1291	0.00604		1290	0.04891	1290	0.0423064	1290	-0.0122
1292	-0.00515	1292	-0.00574699	1292	0.00564		1291	0.04993	1291	0.0424225	1291	-0.01104
1293	-0.00518	1293	-0.00549476	1293	0.00513		1292	0.05045	1292	0.0425386	1292	-0.00998
1294	-0.0053	1294	-0.00534252	1294	0.00462		1293	0.05067	1293	0.0425548	1293	-0.00892
1295	-0.00543	1295	-0.00519028	1295	0.00411		1294	0.0506	1294	0.0427709	1294	-0.00786
1296	-0.00545	1296	-0.00493805	1296	0.00371		1295	0.05032	1295	0.042987	1295	-0.00691
1297	-0.00538	1297	-0.00458581	1297	0.0033		1296	0.04974	1296	0.0431031	1296	-0.00585
1298	-0.0054	1298	-0.00433357	1298	0.00299		1297	0.04896	1297	0.0432192	1297	-0.00479
1299	-0.00543	1299	-0.00408134	1299	0.00258		1298	0.04799	1298	0.0431353	1298	-0.00383
1300	-0.00545	1300	-0.0038291	1300	0.00218		1299	0.04671	1299	0.0430514	1299	-0.00297
1301	-0.00548	1301	-0.00357686	1301	0.00167		1300	0.04513	1300	0.0428676	1300	-0.00231
1302	-0.0054	1302	-0.00322463	1302	0.00126		1301	0.04335	1301	0.0426837	1301	-0.00155
1303	-0.00513	1303	-0.00267239	1303	0.0007525		1302	0.04158	1302	0.0423998	1302	-0.000894805
1304	-0.00465	1304	-0.00192015	1304	0.000345		1303	0.0397	1303	0.0420159	1303	-0.000136071
1305	-0.00398	1305	-0.000967917	1305	3.75e-05		1304	0.03782	1304	0.041632	1304	0.000622664
1306	-0.0033	1306	-1.56804e-05	1306	-0.00027		1305	0.03574	1305	0.0412481	1305	0.00118
1307	-0.00263	1307	0.000169241	1307	-0.0003775		1306	0.03357	1306	0.0408642	1306	0.00164
1308	-0.00175	1308	8.1231e-05	1308	-0.000385		1307	0.03159	1307	0.0405804	1307	0.0019
1309	-0.000875	1309	-6.77905e-06	1309	-0.0002925		1308	0.02971	1308	0.0401965	1308	0.00206
1310	-5.40012e-13	1310	-9.47891e-05	1310	8.52651e-14		1309	0.02803	1309	0.0397126	1309	0.00222
1311	0.000577415	1311	-0.000382799	1311	-0.000365421		1310	0.02646	1310	0.0388287	1310	0.00238
1312	0.00125	1312	-0.000570809	1312	-0.000930841		1311	0.02498	1311	0.0378448	1311	0.00243
1313	0.00333	1313	0.000641181	1313	-0.0016		1312	0.0236	1312	0.0368609	1312	0.00269
1314	0.00881	1314	0.00525317	1314	-0.00146		1313	0.02242	1313	0.036077	1313	0.00295
1315	0.02019	1315	0.0157652	1315	0.000872896		1314	0.02135	1314	0.0353932	1314	0.00341
1316	0.03926	1316	0.0339772	1316	0.00661		1315	0.02047	1315	0.0347093	1315	0.00397
1317	0.06664	1317	0.0604891	1317	0.01684		1316	0.01989	1316	0.0338254	1316	0.00453
1318	0.10142	1318	0.0946617	1318	0.03138		1317	0.01941	1317	0.0328415	1317	0.00509
1319	0.1421	1319	0.135078	1319	0.04991		1318	0.01914	1318	0.0317576	1318	0.00544
1320	0.18677	1320	0.179494	1320	0.07165		1319	0.01906	1319	0.0307737	1319	0.0058
1321	0.23395	1321	0.22641	1321	0.09558		1320	0.01898	1320	0.0298898	1320	0.00596
1322	0.28243	1322	0.274627	1322	0.12121		1321	0.01921	1321	0.029006	1321	0.00612
1323	0.33161	1323	0.323543	1323	0.14785		1322	0.01963	1322	0.0280221	1322	0.00638
1324	0.38088	1324	0.372559	1324	0.17508		1323	0.02025	1323	0.0270382	1323	0.00654
1325	0.42986	1325	0.421275	1325	0.20262		1324	0.02097	1324	0.0260543	1324	0.0066
1326	0.47784	1326	0.468991	1326	0.23005		1325	0.0218	1325	0.0251704	1325	0.00676
1327	0.52392	1327	0.514808	1327	0.25739		1326	0.02262	1326	0.0242865	1326	0.00701
1328	0.56649	1328	0.557124	1328	0.28372		1327	0.02344	1327	0.0234026	1327	0.00727
1329	0.60327	1329	0.59364	1329	0.30836		1328	0.02436	1328	0.0223188	1328	0.00743
1330	0.63165	1330	0.621756	1330	0.32979		1329	0.02519	1329	0.0211349	1329	0.00759
1331	0.64993	1331	0.639772	1331	0.34663		1330	0.02601	1330	0.019951	1330	0.00765
1332	0.6574	1332	0.646989	1332	0.35776		1331	0.02683	1331	0.0188671	1331	0.00761
1333	0.65498	1333	0.644305	1333	0.3632		1332	0.02755	1332	0.0177832	1332	0.00767
1334	0.64436	1334	0.633421	1334	0.36333		1333	0.02828	1333	0.0168993	1333	0.00793
1335	0.62744	1335	0.616237	1335	0.35906		1334	0.0289	1334	0.0160154	1334	0.00818
1336	0.60561	1336	0.594154	1336	0.3512		1335	0.02952	1335	0.0151316	1335	0.00844
1337	0.58039	1337	0.56867	1337	0.34053		1336	0.03004	1336	0.0141477	1336	0.0088
1338	0.55257	1338	0.540586	1338	0.32767		1337	0.03027	1337	0.0131638	1337	0.00896
1339	0.52305	1339	0.510802	1339	0.3131		1338	0.03029	1338	0.0120799	1338	0.00912
1340	0.49252	1340	0.480018	1340	0.29724		1339	0.03001	1339	0.011096	1339	0.00928
1341	0.4617	1341	0.448935	1341	0.28047		1340	0.02943	1340	0.0102121	1340	0.00944
1342	0.43138	1342	0.418351	1342	0.26331		1341	0.02856	1341	0.00922825	1341	0.0095
1343	0.40205	1343	0.388767	1343	0.24624		1342	0.02738	1342	0.00834436	1342	0.00955
1344	0.37403	1344	0.360483	1344	0.22948		1343	0.026	1343	0.00746048	1343	0.00961
1345	0.34751	1345	0.333699	1345	0.21321		1344	0.02452	1344	0.00657659	1344	0.00967
1346	0.32249	1346	0.308416	1346	0.19754		1345	0.02265	1345	0.0057927	1345	0.00963
1347	0.29896	1347	0.284632	1347	0.18258		1346	0.02077	1346	0.00500882	1346	0.00959
1348	0.27694	1348	0.262348	1348	0.16841		1347	0.01879	1347	0.00442493	1347	0.00945
1349	0.25632	1349	0.241464	1349	0.15505		1348	0.01661	1348	0.00374105	1348	0.00921
1350	0.2373	1350	0.22218	1350	0.14248		1349	0.01444	1349	0.00285716	1349	0.00887
1351	0.21987	1351	0.204497	1351	0.13072		1350	0.01216	1350	0.00197328	1350	0.00852
1352	0.20385	1352	0.188213	1352	0.11965		1351	0.00988	1351	0.000989391	1351	0.00818
1353	0.18933	1353	0.173429	1353	0.10949		1352	0.00761	1352	5.50582e-06	1352	0.00804
1354	0.17591	1354	0.159745	1354	0.10002		1353	0.00533	1353	-0.00077838	1353	0.008
1355	0.16368	1355	0.147262	1355	0.09126		1354	0.00315	1354	-0.00146227	1354	0.00796
1356	0.15236	1356	0.135678	1356	0.08299		1355	0.00117	1355	-0.00204615	1355	0.00792
1357	0.14214	1357	0.125194	1357	0.07533		1356	-0.000604659	1356	-0.00273004	1356	0.00768
1358	0.13262	1358	0.11541	1358	0.06826		1357	-0.00208	1357	-0.00331392	1357	0.00734
1359	0.12389	1359	0.106426	1359	0.06159		1358	-0.00346	1358	-0.00399781	1358	0.00699
1360	0.11557	1360	0.0978426	1360	0.05533		1359	-0.00429	1359	-0.00478169	1359	0.0067
1361	0.10785	1361	0.0898588	1361	0.04956		1360	-0.00491	1360	-0.00545202	1360	0.00651
1362	0.10053	1362	0.082275	1362	0.044		1361	-0.00544	1361	-0.00612235	1361	0.00622
1363	0.0938	1363	0.0752912	1363	0.03873		1362	-0.00576	1362	-0.00679269	1362	0.00583
1364	0.08768	1364	0.0689074	1364	0.03377		1363	-0.00589	1363	-0.00726302	1363	0.00544
1365	0.08206	1365	0.0630236	1365	0.0292		1364	-0.00592	1364	-0.00773335	1364	0.00485
1366	0.07694	1366	0.0576399	1366	0.02504		1365	-0.00564	1365	-0.00800368	1365	0.00436
1367	0.07221	1367	0.0526561	1367	0.02147		1366	-0.00507	1366	-0.00827401	1366	0.00397
1368	0.06769	1368	0.0478723	1368	0.01831		1367	-0.00449	1367	-0.00854434	1367	0.00348
1369	0.06337	1369	0.0432885	1369	0.01544		1368	-0.00372	1368	-0.00881467	1368	0.00289
1370	0.05934	1370	0.0390047	1370	0.01297		1369	-0.00295	1369	-0.008985	1369	0.0023
1371	0.05552	1371	0.0349209	1371	0.01071		1370	-0.00217	1370	-0.00905533	1370	0.00171
1372	0.0521	1372	0.0312371	1372	0.00874		1371	-0.0014	1371	-0.00902566	1371	0.00132
1373	0.04898	1373	0.0278533	1373	0.00698		1372	-0.000423523	1372	-0.00889599	1372	0.00103
1374	0.04615	1374	0.0247695	1374	0.00551		1373	0.000650476	1373	-0.00876632	1373	0.000737912
1375	0.04353	1375	0.0218857	1375	0.00425		1374	0.00192	1374	-0.00853665	1374	0.000347484
1376	0.04111	1376	0.019202	1376	0.00328		1375	0.0034	1375	-0.00820698	1375	-0.000142944
1377	0.03879	1377	0.0166182	1377	0.00262		1376	0.00477	1376	-0.00787732	1376	-0.000633371
1378	0.03646	1378	0.0140344	1378	0.00235		1377	0.00615	1377	-0.00774765	1377	-0.00102
1379	0.03434	1379	0.0116506	1379	0.00239		1378	0.00742	1378	-0.00761798	1378	-0.00131
1380	0.03222	1380	0.0092668	1380	0.00262		1379	0.00839	1379	-0.00748831	1379	-0.0014
1381	0.0304	1381	0.00718301	1381	0.00296		1380	0.00927	1380	-0.00735864	1380	-0.0015
1382	0.02867	1382	0.00548127	1382	0.00319		1381	0.00994	1381	-0.00712897	1381	-0.00149
1383	0.02705	1383	0.00512398	1383	0.00332		1382	0.01032	1382	-0.0067993	1382	-0.00158
1384	0.02563	1384	0.0049667	1384	0.00356		1383	0.01059	1383	-0.00646963	1383	-0.00167
1385	0.02401	1385	0.00460941	1385	0.00389		1384	0.01066	1384	-0.00623996	1384	-0.00166
1386	0.02228	1386	0.00415212	1386	0.00423		1385	0.01064	1385	-0.00611029	1385	-0.00175
1387	0.02036	1387	0.00349483	1387	0.00476		1386	0.01051	1386	-0.00598062	1386	-0.00184
1388	0.01844	1388	0.00283754	1388	0.0053		1387	0.01029	1387	-0.00575095	1387	-0.00193
1389	0.01672	1389	0.00238025	1389	0.00593		1388	0.00986	1388	-0.00532128	1388	-0.00192
1390	0.01529	1390	0.00222296	1390	0.00637		1389	0.00923	1389	-0.00499161	1389	-0.00201
1391	0.01397	1391	0.00216567	1391	0.0069		1390	0.00831	1390	-0.00466195	1390	-0.002
1392	0.01265	1392	0.00210839	1392	0.00744		1391	0.00718	1391	-0.00433228	1391	-0.00209
1393	0.01133	1393	0.0020511	1393	0.00777		1392	0.00566	1392	-0.00390261	1392	-0.00208
1394	0.01	1394	0.00199381	1394	0.008		1393	0.00413	1393	-0.00357294	1393	-0.00207
1395	0.00858	1395	0.00183652	1395	0.00814		1394	0.0024	1394	-0.00314327	1394	-0.00206
1396	0.00726	1396	0.00177923	1396	0.00827		1395	0.000778449	1395	-0.0027136	1395	-0.00195
1397	0.00604	1397	0.00151508	1397	0.00851		1396	-0.000847552	1396	-0.00228393	1396	-0.00184
1398	0.00481	1398	0.00119631	1398	0.00894		1397	-0.00237	1397	-0.00175426	1397	-0.00173
1399	0.00369	1399	0.000977542	1399	0.00928		1398	-0.0037	1398	-0.00142459	1398	-0.00162
1400	0.00267	1400	0.000858773	1400	0.00951		1399	-0.00503	1399	-0.000994922	1399	-0.00151
1401	0.00174	1401	0.000840005	1401	0.00965		1400	-0.00635	1400	-0.000665252	1400	-0.0015
1402	0.000822197	1402	0.000821236	1402	0.00958		1401	-0.00758	1401	-0.000435583	1401	-0.00139
1403	-9.25974e-05	1403	0.000802468	1403	0.00932		1402	-0.0088	1402	-0.000305914	1402	-0.00128
1404	-0.000670649	1404	0.000783699	1404	0.00885		1403	-0.00983	1403	-0.000276245	1403	-0.00127
1405	-0.00125	1405	0.000764931	1405	0.00829		1404	-0.01086	1404	-0.000246575	1404	-0.00137
1406	-0.00193	1406	0.000646162	1406	0.00762		1405	-0.01158	1405	-0.000116906	1405	-0.00126
1407	-0.0023	1407	0.000827394	1407	0.00675		1406	-0.01191	1406	1.27634e-05	1406	-0.00115
1408	-0.00258	1408	0.00110863	1408	0.00589		1407	-0.01183	1407	0.000242433	1407	-0.00104
1409	-0.00266	1409	0.00158986	1409	0.00492		1408	-0.01156	1408	0.000472102	1408	-0.000827059
1410	-0.00274	1410	0.00172599	1410	0.00376		1409	-0.01109	1409	0.000701771	1409	-0.000817487
1411	-0.00282	1411	0.00160356	1411	0.00249		1410	-0.01051	1410	0.00093144	1410	-0.000807914
1412	-0.003	1412	0.00138112	1412	0.00103		1411	-0.00984	1411	0.00136111	1411	-0.000998342
1413	-0.00297	1413	0.00135869	1413	-0.000738336		1412	-0.00906	1412	0.00179078	1412	-0.00129
1414	-0.00295	1414	0.00133625	1414	-0.0027		1413	-0.00819	1413	0.00242045	1413	-0.00148
1415	-0.00283	1415	0.00141382	1415	-0.00468		1414	-0.00712	1414	0.00295012	1414	-0.00177
1416	-0.00251	1416	0.00169138	1416	-0.00659		1415	-0.00584	1415	0.00357979	1415	-0.00196
1417	-0.00229	1417	0.00186894	1417	-0.0085		1416	-0.00447	1416	0.00400946	1416	-0.00195
1418	-0.00196	1418	0.00214651	1418	-0.01031		1417	-0.00299	1417	0.00463913	1417	-0.00194
1419	-0.00164	1419	0.00242407	1419	-0.01212		1418	-0.00162	1418	0.00526879	1418	-0.00193
1420	-0.00132	1420	0.00270164	1420	-0.01383		1419	-0.000245581	1419	0.00619846	1419	-0.00182
1421	-0.000997532	1421	0.0029792	1421	-0.01535		1420	0.00113	1420	0.00712813	1420	-0.00171
1422	-0.000675584	1422	0.00325677	1422	-0.01686		1421	0.0024	1421	0.0079578	1421	-0.0017
1423	-0.000353636	1423	0.00353433	1423	-0.01827		1422	0.00368	1422	0.00858747	1422	-0.00169
1424	-0.000131688	1424	0.0037119	1424	-0.01948		1423	0.00485	1423	0.00911714	1423	-0.00168
1425	-9.74026e-06	1425	0.00378946	1425	-0.02069		1424	0.00602	1424	0.00954681	1424	-0.00157
1426	0.000212208	1426	0.00396702	1426	-0.0217		1425	0.0072	1425	0.00987648	1425	-0.00126
1427	0.000234156	1427	0.00394459	1427	-0.02271		1426	0.00817	1426	0.0100061	1426	-0.000954758
1428	0.000156104	1428	0.00382215	1428	-0.02352		1427	0.00905	1427	0.0100358	1427	-0.000445186
1429	7.80519e-05	1429	0.00369972	1429	-0.02413		1428	0.00972	1428	0.0100655	1428	-3.56137e-05
1430	2.84217e-14	1430	0.00357728	1430	-0.02464		1429	0.01019	1429	0.0101952	1429	0.000373959
1431	-0.0001	1431	0.00345485	1431	-0.02495		1430	0.01057	1430	0.0104248	1430	0.000783531
1432	-0.0001	1432	0.00343241	1432	-0.02506		1431	0.01054	1431	0.0106545	1431	0.000993103
1433	-0.0002	1433	0.00330997	1433	-0.02507		1432	0.01032	1432	0.0108842	1432	0.0011
1434	-0.0002	1434	0.00328754	1434	-0.02498		1433	0.00989	1433	0.0110138	1433	0.00111
1435	-0.0004	1435	0.0030651	1435	-0.0248		1434	0.00926	1434	0.0111435	1434	0.00102
1436	-0.0006	1436	0.00284267	1436	-0.02451		1435	0.00844	1435	0.0111732	1435	0.000831392
1437	-0.0009	1437	0.00252023	1437	-0.02432		1436	0.00751	1436	0.0112028	1436	0.000540964
1438	-0.0012	1438	0.0021978	1438	-0.02413		1437	0.00649	1437	0.0114325	1437	0.000350537
1439	-0.0015	1439	0.00187536	1439	-0.02394		1438	0.00516	1438	0.0116622	1438	0.000260109
1440	-0.0016	1440	0.00175293	1440	-0.02365		1439	0.00363	1439	0.0119918	1439	6.96812e-05
1441	-0.0017	1441	0.00163049	1441	-0.02326		1440	0.00201	1440	0.0122215	1440	-2.07465e-05
1442	-0.0017	1442	0.00160805	1442	-0.02267		1441	0.000182392	1441	0.0125512	1441	-0.000311174
1443	-0.0016	1443	0.00168562	1443	-0.02198		1442	-0.00164	1442	0.0128809	1442	-0.000701602
1444	-0.0014	1444	0.00186318	1444	-0.02119		1443	-0.00357	1443	0.0131105	1443	-0.00119
1445	-0.0012	1445	0.00204075	1445	-0.0204		1444	-0.0053	1444	0.0132402	1444	-0.00168
1446	-0.001	1446	0.00221831	1446	-0.01971		1445	-0.00702	1445	0.0132699	1445	-0.00217
1447	-0.001	1447	0.00219588	1447	-0.01922		1446	-0.00835	1446	0.0132995	1446	-0.00256
1448	-0.0009	1448	0.00227344	1448	-0.01863		1447	-0.00957	1447	0.0132292	1447	-0.00295
1449	-0.0008	1449	0.00232393	1449	-0.01815		1448	-0.0105	1448	0.0133589	1448	-0.00304
1450	-0.0006	1450	0.00247272	1450	-0.01756		1449	-0.01133	1449	0.0133885	1449	-0.00313
1451	-0.0002	1451	0.00282151	1451	-0.01687		1450	-0.01195	1450	0.0133182	1450	-0.00303
1452	0.0002	1452	0.0031703	1452	-0.01618		1451	-0.01238	1451	0.0130479	1451	-0.00282
1453	0.0005	1453	0.00341909	1453	-0.01539		1452	-0.0126	1452	0.0127776	1452	-0.00261
1454	0.0007	1454	0.00356787	1454	-0.0147		1453	-0.01253	1453	0.0124072	1453	-0.0026
1455	0.0009	1455	0.00371666	1455	-0.01411		1454	-0.01226	1454	0.0121369	1454	-0.00269
1456	0.001	1456	0.00376545	1456	-0.01362		1455	-0.01168	1455	0.0117666	1455	-0.00278
1457	0.0011	1457	0.00381424	1457	-0.01333		1456	-0.01091	1456	0.0114962	1456	-0.00277
1458	0.0012	1458	0.00386303	1458	-0.01304		1457	-0.00983	1457	0.0112259	1457	-0.00276
1459	0.0013	1459	0.00391181	1459	-0.01275		1458	-0.00866	1458	0.0110556	1458	-0.00265
1460	0.0016	1460	0.0041606	1460	-0.01256		1459	-0.00729	1459	0.0107852	1459	-0.00244
1461	0.002	1461	0.00450939	1461	-0.01237		1460	-0.00581	1460	0.0106149	1460	-0.00223
1462	0.0026	1462	0.00505818	1462	-0.01219		1461	-0.00434	1461	0.0102446	1461	-0.00212
1463	0.0032	1463	0.00560697	1463	-0.0121		1462	-0.00276	1462	0.00967424	1462	-0.00191
1464	0.0038	1464	0.00615575	1464	-0.01211		1463	-0.00119	1463	0.00900391	1463	-0.0017
1465	0.0042	1465	0.00650454	1465	-0.01222		1464	0.000384364	1464	0.00823358	1464	-0.00159
1466	0.0046	1466	0.00685333	1466	-0.01233		1465	0.00196	1465	0.00756325	1465	-0.00138
1467	0.0051	1467	0.00730212	1467	-0.01264		1466	0.00343	1466	0.00709292	1466	-0.00137
1468	0.0057	1468	0.00785091	1468	-0.01295		1467	0.00491	1467	0.00652259	1467	-0.00126
1469	0.0063	1469	0.00839969	1469	-0.01326		1468	0.00628	1468	0.00585226	1468	-0.00125
1470	0.0069	1470	0.00894848	1470	-0.01367		1469	0.00755	1469	0.00528193	1469	-0.00114
1471	0.0074	1471	0.00939727	1471	-0.01408		1470	0.00873	1470	0.0046116	1470	-0.00103
1472	0.0077	1472	0.00964606	1472	-0.01459		1471	0.0098	1471	0.00394127	1471	-0.000924006
1473	0.0079	1473	0.00979485	1473	-0.0152		1472	0.01078	1472	0.00317094	1472	-0.000714434
1474	0.008	1474	0.00984363	1474	-0.01581		1473	0.01155	1473	0.00240061	1473	-0.000504862
1475	0.0081	1475	0.00989242	1475	-0.01652		1474	0.01222	1474	0.00163027	1474	-0.00019529
1476	0.008	1476	0.00974121	1476	-0.01714		1475	0.0127	1475	0.00105994	1475	1.42826e-05
1477	0.0078	1477	0.00949	1477	-0.01765		1476	0.01297	1476	0.000489613	1476	0.000323855
1478	0.0076	1478	0.00923879	1478	-0.01796		1477	0.01295	1477	1.92827e-05	1477	0.000633427
1479	0.0073	1479	0.00888757	1479	-0.01827		1478	0.01272	1478	-0.000451048	1478	0.000842999
1480	0.0071	1480	0.00863636	1480	-0.01848		1479	0.01239	1479	-0.000821379	1479	0.00105
1481	0.0068	1481	0.00828515	1481	-0.01869		1480	0.01187	1480	-0.00129171	1480	0.00116
1482	0.0065	1482	0.00793394	1482	-0.019		1481	0.01114	1481	-0.00186204	1481	0.00127
1483	0.0063	1483	0.00768273	1483	-0.01921		1482	0.01022	1482	-0.00253237	1482	0.00128
1484	0.0061	1484	0.00743151	1484	-0.01932		1483	0.00899	1483	-0.0032027	1483	0.00119
1485	0.0059	1485	0.0071803	1485	-0.01923		1484	0.00776	1484	-0.00387303	1484	0.001
1486	0.0056	1486	0.00682909	1486	-0.01894		1485	0.00644	1485	-0.00464336	1485	0.000810005
1487	0.0054	1487	0.00657788	1487	-0.01855		1486	0.00511	1486	-0.00541369	1486	0.000619578
1488	0.0052	1488	0.00632667	1488	-0.01816		1487	0.00379	1487	-0.00618402	1487	0.00062915
1489	0.0049	1489	0.00597545	1489	-0.01767		1488	0.00246	1488	-0.00705436	1488	0.000638722
1490	0.0046	1490	0.00562424	1490	-0.01719		1489	0.00103	1489	-0.00782469	1489	0.000748294
1491	0.0044	1491	0.00537303	1491	-0.0167		1490	-0.000491668	1490	-0.00859502	1490	0.000757867
1492	0.0041	1492	0.00502182	1492	-0.01611		1491	-0.00202	1491	-0.00936535	1491	0.000867439
1493	0.0037	1493	0.0045706	1493	-0.01562		1492	-0.00344	1492	-0.0101357	1492	0.000977011
1494	0.0033	1494	0.00411939	1494	-0.01513		1493	-0.00477	1493	-0.010906	1493	0.000986583
1495	0.0029	1495	0.00366818	1495	-0.01464		1494	-0.006	1494	-0.0117763	1494	0.000996156
1496	0.0026	1496	0.00331697	1496	-0.01405		1495	-0.00702	1495	-0.0125467	1495	0.00111
1497	0.0021	1497	0.00276576	1497	-0.01326		1496	-0.00785	1496	-0.013317	1496	0.00122
1498	0.0015	1498	0.00211454	1498	-0.01237		1497	-0.00827	1497	-0.0138873	1497	0.00152
1499	0.001	1499	0.00156333	1499	-0.01128		1498	-0.0085	1498	-0.0143577	1498	0.00193
1500	0.0006	1500	0.00111212	1500	-0.01029		1499	-0.00843	1499	-0.014728	1499	0.00254
1501	0.0002	1501	0.000660908	1501	-0.0094		1500	-0.00805	1500	-0.0149983	1500	0.00305
1502	-0.0002	1502	0.000209696	1502	-0.00861		1501	-0.00768	1501	-0.0152687	1501	0.00346
1503	-0.0004	1503	-4.15157e-05	1503	-0.00772		1502	-0.007	1502	-0.015339	1502	0.00377
1504	-0.0007	1504	-0.000392728	1504	-0.00684		1503	-0.00613	1503	-0.0155093	1503	0.00378
1505	-0.0008	1505	-0.00054394	1505	-0.00575		1504	-0.00496	1504	-0.0155796	1504	0.00379
1506	-0.0009	1506	-0.000695152	1506	-0.00456		1505	-0.00368	1505	-0.01565	1505	0.0038
1507	-0.0008	1507	-0.000646364	1507	-0.00337		1506	-0.00221	1506	-0.0157203	1506	0.00371
1508	-0.0006	1508	-0.000497576	1508	-0.00218		1507	-0.000633689	1507	-0.0157906	1507	0.00372
1509	-0.0003	1509	-0.000248788	1509	-0.00109		1508	0.00114	1508	-0.015861	1508	0.00373
1510	1.08002e-12	1510	-3.97904e-13	1510	-3.12639e-13		1509	0.00265	1509	-0.0157313	1509	0.00391
1511	-5.58333e-05	1511	-0.000221019	1511	0.000535833		1510	0.00545	1510	-0.0150358	1510	0.00449
1512	-1.16667e-05	1512	-0.000342038	1512	0.000771667		1511	0.01396	1511	-0.0111402	1511	0.00847
1513	0.00123	1513	0.000736944	1513	0.0008075		1512	0.03777	1512	0.00245529	1512	0.02205
1514	0.00538	1514	0.00471592	1514	0.00134		1513	0.08907	1513	0.0352508	1513	0.05433
1515	0.01482	1515	0.0139949	1515	0.00368		1514	0.17678	1514	0.0952463	1514	0.11231
1516	0.03157	1516	0.0305739	1516	0.00932		1515	0.30159	1515	0.184642	1515	0.19759
1517	0.05631	1517	0.0551529	1517	0.01915		1516	0.457	1516	0.299737	1516	0.30577
1518	0.08845	1518	0.0871318	1518	0.03349		1517	0.6323	1517	0.432833	1517	0.42895
1519	0.1263	1519	0.124811	1519	0.05162		1518	0.81781	1518	0.575928	1518	0.55953
1520	0.16804	1520	0.16639	1520	0.07266		1519	1.00692	1519	0.723224	1519	0.69201
1521	0.21209	1521	0.210269	1521	0.09579		1520	1.19612	1520	0.87142	1520	0.82369
1522	0.25753	1522	0.255548	1522	0.12013		1521	1.38373	1521	1.01892	1521	0.95307
1523	0.30357	1523	0.301427	1523	0.14547		1522	1.56834	1522	1.16431	1522	1.07895
1524	0.34972	1524	0.347406	1524	0.1712		1523	1.74764	1523	1.30601	1523	1.20013
1525	0.39546	1525	0.392985	1525	0.19714		1524	1.91895	1524	1.4418	1524	1.31471
1526	0.44041	1526	0.437764	1526	0.22307		1525	2.07916	1525	1.5695	1525	1.42099
1527	0.48375	1527	0.480943	1527	0.24881		1526	2.22246	1526	1.68529	1526	1.51527
1528	0.524	1528	0.521022	1528	0.27365		1527	2.33867	1527	1.78229	1527	1.59085
1529	0.55934	1529	0.556201	1529	0.29668		1528	2.41618	1528	1.85138	1528	1.63893
1530	0.58708	1530	0.58378	1530	0.31652		1529	2.44678	1529	1.88518	1529	1.65331
1531	0.60533	1531	0.601859	1531	0.33175		1530	2.43009	1530	1.88157	1530	1.63289
1532	0.61347	1532	0.609838	1532	0.34139		1531	2.3732	1531	1.84477	1531	1.58287
1533	0.61192	1533	0.608117	1533	0.34512		1532	2.28681	1532	1.78257	1532	1.51125
1534	0.60256	1534	0.598596	1534	0.34346		1533	2.18131	1533	1.70346	1533	1.42613
1535	0.5874	1535	0.583275	1535	0.3372		1534	2.06402	1534	1.61376	1534	1.33361
1536	0.56785	1536	0.563554	1536	0.32753		1535	1.93903	1535	1.51735	1535	1.23699
1537	0.54509	1537	0.540632	1537	0.31507		1536	1.80873	1536	1.41645	1536	1.13827
1538	0.51974	1538	0.515111	1538	0.3006		1537	1.67544	1537	1.31294	1537	1.03885
1539	0.49258	1539	0.48779	1539	0.28454		1538	1.54185	1538	1.20884	1538	0.94083
1540	0.46423	1540	0.459269	1540	0.26738		1539	1.41095	1539	1.10683	1539	0.84621
1541	0.43547	1541	0.430348	1541	0.24941		1540	1.28546	1540	1.00893	1540	0.75689
1542	0.40701	1542	0.401727	1542	0.23115		1541	1.16727	1541	0.916526	1541	0.67387
1543	0.37936	1543	0.373906	1543	0.21298		1542	1.05687	1542	0.830221	1542	0.59755
1544	0.3527	1544	0.347085	1544	0.19552		1543	0.95428	1543	0.750017	1543	0.52803
1545	0.32725	1545	0.321464	1545	0.17875		1544	0.85929	1544	0.675612	1544	0.46471
1546	0.30309	1546	0.297143	1546	0.16289		1545	0.77169	1545	0.606808	1545	0.40749
1547	0.28043	1547	0.274322	1547	0.14803		1546	0.6913	1546	0.543703	1546	0.35577
1548	0.25928	1548	0.253001	1548	0.13426		1547	0.61821	1547	0.486199	1547	0.30945
1549	0.23942	1549	0.23298	1549	0.1216		1548	0.55201	1548	0.434194	1548	0.26813
1550	0.22077	1550	0.214159	1550	0.11013		1549	0.49232	1549	0.38739	1549	0.23131
1551	0.20331	1551	0.196538	1551	0.09977		1550	0.43863	1550	0.345185	1550	0.19868
1552	0.18726	1552	0.180317	1552	0.09041		1551	0.39054	1551	0.307381	1551	0.16966
1553	0.1725	1553	0.165396	1553	0.08214		1552	0.34754	1552	0.273376	1552	0.14414
1554	0.15884	1554	0.151575	1554	0.07478		1553	0.30915	1553	0.242872	1553	0.12152
1555	0.14629	1555	0.138854	1555	0.06831		1554	0.27496	1554	0.215468	1554	0.1014
1556	0.13463	1556	0.127033	1556	0.06285		1555	0.24456	1555	0.190963	1555	0.08348
1557	0.12378	1557	0.116012	1557	0.05808		1556	0.21767	1556	0.169159	1556	0.06736
1558	0.11372	1558	0.105791	1558	0.05382		1557	0.19398	1557	0.149754	1557	0.05304
1559	0.10446	1559	0.0963701	1559	0.04996		1558	0.17318	1558	0.13255	1558	0.04042
1560	0.09601	1560	0.0877491	1560	0.04649		1559	0.15489	1559	0.117545	1559	0.0294
1561	0.08815	1561	0.079728	1561	0.04323		1560	0.1388	1560	0.104341	1560	0.01958
1562	0.0808	1562	0.072207	1562	0.04026		1561	0.1248	1561	0.0930362	1561	0.01096
1563	0.07384	1563	0.065086	1563	0.0376		1562	0.11271	1562	0.0831318	1562	0.00344
1564	0.06749	1564	0.058565	1564	0.03524		1563	0.10232	1563	0.0744273	1563	-0.00298
1565	0.06163	1565	0.052544	1565	0.03317		1564	0.09352	1564	0.0669228	1564	-0.0083
1566	0.05637	1566	0.0471229	1566	0.03131		1565	0.08603	1565	0.0603184	1565	-0.01282
1567	0.05162	1567	0.0422019	1567	0.02954		1566	0.07974	1566	0.0546139	1566	-0.01664
1568	0.04716	1568	0.0375809	1568	0.02798		1567	0.07425	1567	0.0497094	1567	-0.01986
1569	0.04311	1569	0.0333599	1569	0.02641		1568	0.06955	1568	0.0454049	1568	-0.02248
1570	0.03945	1570	0.0295389	1570	0.02485		1569	0.06556	1569	0.0418005	1569	-0.0246
1571	0.03629	1571	0.0262179	1571	0.02319		1570	0.06217	1570	0.038696	1570	-0.02612
1572	0.03364	1572	0.0233968	1572	0.02172		1571	0.05917	1571	0.0361915	1571	-0.02704
1573	0.03128	1573	0.0208758	1573	0.02046		1572	0.05648	1572	0.0341871	1572	-0.02756
1574	0.02933	1574	0.0187548	1574	0.01929		1573	0.05409	1573	0.0326826	1573	-0.02768
1575	0.02747	1575	0.0167338	1575	0.01833		1574	0.05199	1574	0.0316781	1574	-0.0275
1576	0.02591	1576	0.0150128	1576	0.01756		1575	0.0501	1575	0.0310737	1575	-0.02692
1577	0.02456	1577	0.0134917	1577	0.0167		1576	0.04841	1576	0.0305692	1576	-0.02624
1578	0.0234	1578	0.0121707	1578	0.01594		1577	0.04671	1577	0.0302647	1577	-0.02536
1579	0.02245	1579	0.0110497	1579	0.01507		1578	0.04492	1578	0.0301602	1578	-0.02458
1580	0.02169	1580	0.0101287	1580	0.01411		1579	0.04303	1579	0.0301558	1579	-0.0237
1581	0.02114	1581	0.00940767	1581	0.01314		1580	0.04093	1580	0.0304513	1580	-0.02282
1582	0.02058	1582	0.00868665	1582	0.01218		1581	0.03874	1581	0.0308468	1581	-0.02194
1583	0.02022	1583	0.00816563	1583	0.01122		1582	0.03645	1582	0.0315424	1582	-0.02086
1584	0.01987	1584	0.00764461	1584	0.01035		1583	0.03426	1583	0.0325379	1583	-0.01988
1585	0.01971	1585	0.00732359	1585	0.00949		1584	0.03196	1584	0.0336334	1584	-0.0189
1586	0.01946	1586	0.00690257	1586	0.00852		1585	0.02967	1585	0.0348289	1585	-0.01802
1587	0.0192	1587	0.00648155	1587	0.00736		1586	0.02738	1586	0.0359245	1586	-0.01704
1588	0.01874	1588	0.00586053	1588	0.00579		1587	0.02518	1587	0.03702	1587	-0.01606
1589	0.01829	1589	0.00523952	1589	0.00413		1588	0.02299	1588	0.0381155	1588	-0.01498
1590	0.01773	1590	0.0045185	1590	0.00237		1589	0.0209	1589	0.0390111	1589	-0.014
1591	0.01718	1591	0.00379748	1591	0.0007025		1590	0.0188	1590	0.0397066	1590	-0.01282
1592	0.01662	1592	0.00307646	1592	-0.00106		1591	0.01681	1591	0.0403021	1591	-0.01164
1593	0.01617	1593	0.00245544	1593	-0.00293		1592	0.01502	1592	0.0408977	1592	-0.01026
1594	0.01551	1594	0.00163442	1594	-0.00479		1593	0.01362	1593	0.0415932	1593	-0.00878
1595	0.01485	1595	0.000894185	1595	-0.00675		1594	0.01253	1594	0.0422887	1594	-0.0072
1596	0.0142	1596	0.00106297	1596	-0.00862		1595	0.01194	1595	0.0429842	1595	-0.00572
1597	0.01344	1597	0.00113176	1597	-0.01048		1596	0.01174	1596	0.0434798	1596	-0.00434
1598	0.01269	1598	0.00120055	1598	-0.01215		1597	0.01175	1597	0.0439753	1597	-0.00306
1599	0.01183	1599	0.00116934	1599	-0.01371		1598	0.01196	1598	0.0441708	1598	-0.00188
1600	0.01097	1600	0.00113813	1600	-0.01508		1599	0.01247	1599	0.0442664	1599	-0.000801092
1601	0.01002	1601	0.00100692	1601	-0.01634		1600	0.01317	1600	0.0444619	1600	0.000278784
1602	0.00906	1602	0.000875705	1602	-0.0173		1601	0.01418	1601	0.0446574	1601	0.00126
1603	0.00821	1603	0.000844494	1603	-0.01807		1602	0.01549	1602	0.044853	1602	0.00224
1604	0.00755	1604	0.00101328	1604	-0.01863		1603	0.01709	1603	0.0450485	1603	0.00292
1605	0.0069	1605	0.00118207	1605	-0.0191		1604	0.019	1604	0.045144	1604	0.0036
1606	0.00624	1606	0.00135086	1606	-0.01936		1605	0.02101	1605	0.0452395	1605	0.00408
1607	0.00568	1607	0.00161965	1607	-0.01942		1606	0.02301	1606	0.0454351	1606	0.00426
1608	0.00503	1608	0.00178844	1608	-0.01919		1607	0.02512	1607	0.0456306	1607	0.00444
1609	0.00417	1609	0.00175723	1609	-0.01875		1608	0.02713	1608	0.0457261	1608	0.00442
1610	0.00332	1610	0.00172601	1610	-0.01822		1609	0.02913	1609	0.0458217	1609	0.0046
1611	0.00246	1611	0.0016948	1611	-0.01748		1610	0.03094	1610	0.0456172	1610	0.00488
1612	0.0016	1612	0.00166359	1612	-0.01675		1611	0.03275	1611	0.0453127	1611	0.00526
1613	0.000949167	1613	0.00183238	1613	-0.01601		1612	0.03435	1612	0.0450082	1612	0.00544
1614	0.000293333	1614	0.00200117	1614	-0.01527		1613	0.03586	1613	0.0446038	1613	0.00552
1615	-0.0002625	1615	0.00226996	1615	-0.01434		1614	0.03717	1614	0.0442993	1614	0.0056
1616	-0.000718333	1616	0.00263874	1616	-0.0134		1615	0.03817	1615	0.0438948	1615	0.00558
1617	-0.00127	1617	0.00290753	1617	-0.01227		1616	0.03888	1616	0.0432904	1616	0.00576
1618	-0.00173	1618	0.00327632	1618	-0.01103		1617	0.03919	1617	0.0423859	1617	0.00614
1619	-0.00219	1619	0.00364511	1619	-0.00959		1618	0.0393	1618	0.0413814	1618	0.00662
1620	-0.00244	1620	0.0042139	1620	-0.00836		1619	0.0391	1619	0.040377	1619	0.0071
1621	-0.0028	1621	0.00468269	1621	-0.00722		1620	0.03861	1620	0.0394725	1620	0.00748
1622	-0.00295	1622	0.00415093	1622	-0.00629		1621	0.03792	1621	0.038668	1621	0.00796
1623	-0.00301	1623	0.00346726	1623	-0.00535		1622	0.03712	1622	0.0377635	1622	0.00834
1624	-0.00287	1624	0.00298359	1624	-0.00452		1623	0.03593	1623	0.0368591	1623	0.00872
1625	-0.00262	1625	0.00259992	1625	-0.00368		1624	0.03454	1624	0.0359546	1624	0.0089
1626	-0.00228	1626	0.00231625	1626	-0.00274		1625	0.03294	1625	0.0351501	1625	0.00888
1627	-0.00183	1627	0.00213258	1627	-0.00191		1626	0.03095	1626	0.0343457	1626	0.00886
1628	-0.00129	1628	0.00204891	1628	-0.00117		1627	0.02886	1627	0.0336412	1627	0.00894
1629	-0.000644167	1629	0.00206524	1629	-0.000635833		1628	0.02666	1628	0.0329367	1628	0.00902
1630	-1.27898e-12	1630	0.00208157	1630	-7.38964e-13		1629	0.02447	1629	0.0322323	1629	0.0092
1631	0.000805	1631	0.0021979	1631	0.0006		1630	0.02228	1630	0.0315278	1630	0.00948
1632	0.00151	1632	0.00221423	1632	0.0012		1631	0.02018	1631	0.0309233	1631	0.00965
1633	0.00222	1633	0.00223056	1633	0.0019		1632	0.01799	1632	0.0304188	1632	0.00973
1634	0.00282	1634	0.00214689	1634	0.0026		1633	0.0158	1633	0.0299144	1633	0.00981
1635	0.00343	1635	0.00206322	1635	0.0033		1634	0.01361	1634	0.0294099	1634	0.00979
1636	0.00393	1636	0.00187955	1636	0.0041		1635	0.01141	1635	0.0288054	1635	0.00977
1637	0.00454	1637	0.00179588	1637	0.0048		1636	0.00942	1636	0.028101	1636	0.00985
1638	0.00524	1638	0.00181221	1638	0.0053		1637	0.00743	1637	0.0273965	1637	0.00983
1639	0.00595	1639	0.00182854	1639	0.0058		1638	0.00553	1638	0.026792	1638	0.00981
1640	0.00665	1640	0.00184487	1640	0.0061		1639	0.00394	1639	0.0260875	1639	0.00989
1641	0.00726	1641	0.0017612	1641	0.0064		1640	0.00265	1640	0.0253831	1640	0.00997
1642	0.00796	1642	0.00177753	1642	0.0068		1641	0.00155	1641	0.0246786	1641	0.00995
1643	0.00847	1643	0.00159386	1643	0.0071		1642	0.000760326	1642	0.0239741	1642	0.00993
1644	0.00897	1644	0.00141019	1644	0.0072		1643	0.000167192	1643	0.0232697	1643	0.00991
1645	0.00938	1645	0.00112652	1645	0.0071		1644	-0.000325942	1644	0.0224652	1644	0.00989
1646	0.00978	1646	0.000842852	1646	0.0069		1645	-0.000619076	1645	0.0216607	1645	0.00987
1647	0.00999	1647	0.000359182	1647	0.0065		1646	-0.00081221	1646	0.0207563	1646	0.00975
1648	0.01029	1648	-2.4488e-05	1648	0.0059		1647	-0.000705345	1647	0.0197518	1647	0.00953
1649	0.0105	1649	-0.000508158	1649	0.0053		1648	-0.000398479	1648	0.0187473	1648	0.00931
1650	0.0107	1650	-0.000991828	1650	0.0046		1649	0.000108387	1649	0.0177428	1649	0.00909
1651	0.01081	1651	-0.0015755	1651	0.0039		1650	0.000815253	1650	0.0167384	1650	0.00877
1652	0.01091	1652	-0.00215917	1652	0.0032		1651	0.00152	1651	0.0158339	1651	0.00845
1653	0.01092	1653	-0.00284284	1653	0.0025		1652	0.00233	1652	0.0149294	1652	0.00803
1654	0.01102	1654	-0.00342651	1654	0.0019		1653	0.00334	1653	0.014025	1653	0.00771
1655	0.01113	1655	-0.00277822	1655	0.0012		1654	0.00424	1654	0.0133205	1654	0.00739
1656	0.01113	1656	-0.0018002	1656	0.0006		1655	0.00525	1655	0.012816	1655	0.00717
1657	0.01094	1657	-0.00102218	1657	-0.0001		1656	0.00636	1656	0.0124116	1656	0.00685
1658	0.01074	1658	-0.000244156	1658	-0.0007		1657	0.00746	1657	0.0118071	1657	0.00653
1659	0.01035	1659	0.000333865	1659	-0.0011		1658	0.00867	1658	0.0110026	1658	0.00611
1660	0.00995	1660	0.000911885	1660	-0.0013		1659	0.01004	1659	0.0100981	1659	0.00569
1661	0.00956	1661	0.00148991	1661	-0.0015		1660	0.01131	1660	0.0089792	1660	0.00517
1662	0.00926	1662	0.00216793	1662	-0.0015		1661	0.01218	1661	0.00806026	1661	0.00456
1663	0.00897	1663	0.00284595	1663	-0.0015		1662	0.01285	1662	0.00724131	1662	0.00394
1664	0.00867	1664	0.00352397	1664	-0.0015		1663	0.01312	1663	0.00652237	1663	0.00332
1665	0.00818	1665	0.00400199	1665	-0.0014		1664	0.01319	1664	0.00590343	1664	0.0027
1666	0.00768	1666	0.00448001	1666	-0.0013		1665	0.01316	1665	0.00528449	1665	0.00228
1667	0.00699	1667	0.00475803	1667	-0.001		1666	0.01293	1666	0.00456555	1666	0.00186
1668	0.00619	1668	0.00493605	1668	-0.0006		1667	0.0126	1667	0.00384661	1667	0.00145
1669	0.0053	1669	0.00501407	1669	-0.0001		1668	0.01217	1668	0.00312766	1668	0.00103
1670	0.0043	1670	0.00499209	1670	0.0004		1669	0.01144	1669	0.00230872	1669	0.000608454
1671	0.00341	1671	0.00507011	1671	0.0009		1670	0.01051	1670	0.00128978	1670	0.000289986
1672	0.00251	1672	0.00514813	1672	0.0014		1671	0.00928	1671	0.000270839	1671	-2.84826e-05
1673	0.00161	1673	0.00522615	1673	0.002		1672	0.00775	1672	-0.000648103	1672	-0.000246951
1674	0.00062	1674	0.00520417	1674	0.0025		1673	0.00612	1673	-0.00136705	1673	-0.00046542
1675	-0.000475	1675	0.00508219	1675	0.0031		1674	0.00429	1674	-0.00188599	1674	-0.000683888
1676	-0.00167	1676	0.00486021	1676	0.0036		1675	0.00256	1675	-0.00230493	1675	-0.000802356
1677	-0.00297	1677	0.00453823	1677	0.004		1676	0.000731425	1676	-0.00262387	1676	-0.000820825
1678	-0.00426	1678	0.00421625	1678	0.0045		1677	-0.0011	1677	-0.00294281	1677	-0.000739293
1679	-0.00546	1679	0.00399428	1679	0.0049		1678	-0.00303	1678	-0.00316175	1678	-0.000657762
1680	-0.00645	1680	0.0039723	1680	0.0054		1679	-0.00486	1679	-0.0033807	1679	-0.00047623
1681	-0.00735	1681	0.00405032	1681	0.0059		1680	-0.00659	1680	-0.00349964	1680	-0.000494699
1682	-0.00794	1682	0.00442834	1682	0.0064		1681	-0.00812	1681	-0.00371858	1681	-0.000413167
1683	-0.00854	1683	0.00470873	1683	0.0068		1682	-0.00955	1682	-0.00383752	1682	-0.000431636
1684	-0.00893	1684	0.00384203	1684	0.0072		1683	-0.01088	1683	-0.00405646	1683	-0.000550104
1685	-0.00933	1685	0.00297532	1685	0.0076		1684	-0.01191	1684	-0.00427541	1684	-0.000668573
1686	-0.00962	1686	0.00220862	1686	0.008		1685	-0.01274	1685	-0.00439435	1685	-0.000887041
1687	-0.00992	1687	0.00144192	1687	0.0084		1686	-0.01347	1686	-0.00451329	1686	-0.00101
1688	-0.01021	1688	0.000675211	1688	0.0088		1687	-0.014	1687	-0.00463223	1687	-0.00102
1689	-0.01031	1689	0.000108507	1689	0.0091		1688	-0.01433	1688	-0.00485117	1688	-0.000942446
1690	-0.0101	1690	-0.000158198	1690	0.0093		1689	-0.01446	1689	-0.00507011	1689	-0.000860915
1691	-0.0097	1691	-0.000224902	1691	0.0095		1690	-0.01419	1690	-0.00528906	1690	-0.000679383
1692	-0.00899	1692	8.39393e-06	1692	0.0096		1691	-0.01372	1691	-0.005708	1691	-0.000497852
1693	-0.00819	1693	0.00034169	1693	0.0095		1692	-0.01285	1692	-0.00622694	1692	-0.00041632
1694	-0.00728	1694	0.000774985	1694	0.0094		1693	-0.01168	1693	-0.00674588	1693	-0.000534789
1695	-0.00648	1695	0.00110828	1695	0.0092		1694	-0.01031	1694	-0.00726482	1694	-0.000753257
1696	-0.00587	1696	0.00124158	1696	0.0091		1695	-0.00884	1695	-0.00778377	1695	-0.00117
1697	-0.00547	1697	0.00117487	1697	0.0089		1696	-0.00727	1696	-0.00830271	1696	-0.00149
1698	-0.00506	1698	0.00110817	1698	0.0086		1697	-0.0058	1697	-0.00882165	1697	-0.00181
1699	-0.00456	1699	0.00114146	1699	0.0081		1698	-0.00443	1698	-0.00924059	1698	-0.00193
1700	-0.00415	1700	0.00107476	1700	0.0075		1699	-0.00306	1699	-0.00945953	1699	-0.00195
1701	-0.00375	1701	0.00100806	1701	0.0067		1700	-0.00169	1700	-0.00967847	1700	-0.00196
1702	-0.00334	1702	0.000941351	1702	0.006		1701	-0.000216845	1701	-0.00979742	1701	-0.00208
1703	-0.00274	1703	0.00107465	1703	0.0054		1702	0.00115	1702	-0.00981636	1702	-0.0021
1704	-0.00203	1704	0.00130794	1704	0.0048		1703	0.00262	1703	-0.0098353	1703	-0.00202
1705	-0.00133	1705	0.00154124	1705	0.0041		1704	0.00389	1704	-0.00975424	1704	-0.00194
1706	-0.00072	1706	0.00167453	1706	0.0034		1705	0.00516	1705	-0.00947318	1705	-0.00196
1707	-0.000315	1707	0.00160783	1707	0.0027		1706	0.00633	1706	-0.00919213	1706	-0.00207
1708	-1e-05	1708	0.00144113	1708	0.0019		1707	0.0073	1707	-0.00871107	1707	-0.00209
1709	-5e-06	1709	0.000974421	1709	0.0011		1708	0.00817	1708	-0.00823001	1708	-0.00211
1710	-1.08002e-12	1710	0.00100969	1710	-5.40012e-13		1709	0.00874	1709	-0.00774895	1709	-0.00213
1711	1.16667e-05	1711	0.0010572	1711	-0.00136		1710	0.00921	1710	-0.00706789	1710	-0.00205
1712	0.000223333	1712	0.00130471	1712	-0.00312		1711	0.00938	1711	-0.00628683	1711	-0.00197
1713	0.00144	1713	0.00255221	1713	-0.00498		1712	0.00935	1712	-0.00550578	1712	-0.00169
1714	0.00525	1714	0.00639972	1714	-0.00604		1713	0.00922	1713	-0.00482472	1713	-0.0015
1715	0.01386	1715	0.0150472	1715	-0.005		1714	0.00889	1714	-0.00414366	1714	-0.00142
1716	0.02907	1716	0.0302947	1716	-0.000665		1715	0.00836	1715	-0.0034626	1715	-0.00134
1717	0.05158	1717	0.0528422	1717	0.00797		1716	0.00773	1716	-0.00288154	1716	-0.00126
1718	0.08089	1718	0.0821897	1718	0.02091		1717	0.0069	1717	-0.00230049	1717	-0.00128
1719	0.11531	1719	0.116637	1719	0.03775		1718	0.00587	1718	-0.00191943	1718	-0.0013
1720	0.15342	1720	0.154785	1720	0.05769		1719	0.00474	1719	-0.00153837	1719	-0.00131
1721	0.19393	1721	0.195332	1721	0.07993		1720	0.00341	1720	-0.00115731	1720	-0.00133
1722	0.23594	1722	0.23738	1722	0.10387		1721	0.00188	1721	-0.000876253	1721	-0.00125
1723	0.27885	1723	0.280327	1723	0.12901		1722	0.000354608	1722	-0.000395195	1722	-0.00127
1724	0.32206	1724	0.323575	1724	0.15505		1723	-0.00128	1723	0.000185864	1723	-0.00119
1725	0.36508	1725	0.366622	1725	0.18139		1724	-0.00291	1724	0.000666922	1724	-0.00111
1726	0.40709	1726	0.40867	1726	0.20783		1725	-0.00454	1725	0.00094798	1725	-0.000925779
1727	0.4474	1727	0.449017	1727	0.23427		1726	-0.00607	1726	0.00112904	1726	-0.000744248
1728	0.48491	1728	0.486565	1728	0.2602		1727	-0.0075	1727	0.0012101	1727	-0.000562716
1729	0.51762	1729	0.519312	1729	0.28444		1728	-0.00882	1728	0.00129115	1728	-0.000581185
1730	0.54333	1730	0.54506	1730	0.30558		1729	-0.01005	1729	0.00157221	1729	-0.000599653
1731	0.56025	1731	0.562007	1731	0.32212		1730	-0.01098	1730	0.00185327	1730	-0.000718122
1732	0.56756	1732	0.569355	1732	0.33296		1731	-0.01191	1731	0.00223433	1731	-0.00093659
1733	0.56597	1733	0.567802	1733	0.3382		1732	-0.01254	1732	0.00271539	1732	-0.000955059
1734	0.55688	1734	0.55875	1734	0.33834		1733	-0.01307	1733	0.00319645	1733	-0.00107
1735	0.54209	1735	0.543997	1735	0.33418		1734	-0.0134	1734	0.0036775	1734	-0.000991996
1736	0.523	1736	0.524945	1736	0.32652		1735	-0.01363	1735	0.00415856	1735	-0.000910464
1737	0.50082	1737	0.502792	1737	0.31616		1736	-0.01366	1736	0.00443962	1736	-0.000928932
1738	0.47613	1738	0.47814	1738	0.3036		1737	-0.01339	1737	0.00472068	1737	-0.000847401
1739	0.44974	1739	0.451787	1739	0.28934		1738	-0.01302	1738	0.00490174	1738	-0.000765869
1740	0.42245	1740	0.424535	1740	0.27398		1739	-0.01225	1739	0.00528279	1739	-0.000584338
1741	0.39486	1741	0.396982	1741	0.25791		1740	-0.01138	1740	0.00566385	1740	-0.000502806
1742	0.36787	1742	0.37003	1742	0.24165		1741	-0.01021	1741	0.00624491	1741	-0.000521275
1743	0.34169	1743	0.343877	1743	0.22549		1742	-0.00884	1742	0.00682597	1742	-0.000439743
1744	0.3167	1744	0.318925	1744	0.20963		1743	-0.00737	1743	0.00730703	1743	-0.000558212
1745	0.29281	1745	0.295072	1745	0.19447		1744	-0.0058	1744	0.00758809	1744	-0.00057668
1746	0.27012	1746	0.27242	1746	0.18021		1745	-0.00423	1745	0.00776914	1745	-0.000695149
1747	0.24883	1747	0.251167	1747	0.16685		1746	-0.00266	1746	0.0078502	1746	-0.000813617
1748	0.22884	1748	0.231215	1748	0.15439		1747	-0.00109	1747	0.00813126	1747	-0.000832086
1749	0.21026	1749	0.212662	1749	0.14273		1748	0.000376407	1748	0.00851232	1748	-0.000750554
1750	0.19297	1750	0.19541	1750	0.13177		1749	0.00185	1749	0.00899338	1749	-0.000669022
1751	0.17698	1751	0.179457	1751	0.12151		1750	0.00332	1750	0.00947443	1750	-0.000587491
1752	0.16239	1752	0.164905	1752	0.11214		1751	0.00479	1751	0.00995549	1751	-0.000705959
1753	0.1489	1753	0.151452	1753	0.10358		1752	0.00606	1752	0.0103366	1752	-0.000724428
1754	0.13651	1754	0.1391	1754	0.09562		1753	0.00713	1753	0.0105176	1753	-0.000842896
1755	0.12513	1755	0.127748	1755	0.08846		1754	0.0079	1754	0.0105987	1754	-0.000761365
1756	0.11434	1756	0.116995	1756	0.0817		1755	0.00837	1755	0.0105797	1755	-0.000679833
1757	0.10425	1757	0.106943	1757	0.07544		1756	0.00864	1756	0.0105608	1756	-0.000498302
1758	0.09476	1758	0.09749	1758	0.06958		1757	0.00871	1757	0.0104418	1757	-0.00031677
1759	0.08597	1759	0.0887375	1759	0.06402		1758	0.00868	1758	0.0103229	1758	-3.52386e-05
1760	0.07788	1760	0.080685	1760	0.05886		1759	0.00845	1759	0.010404	1759	0.000346293
1761	0.0705	1761	0.0733325	1761	0.054		1760	0.00802	1760	0.010385	1760	0.000827825
1762	0.06361	1762	0.06648	1762	0.04924		1761	0.00759	1761	0.0104661	1761	0.00131
1763	0.05732	1763	0.0602276	1763	0.04478		1762	0.00696	1762	0.0102471	1762	0.00169
1764	0.05133	1764	0.0542751	1764	0.04051		1763	0.00613	1763	0.00982819	1763	0.00177
1765	0.04574	1765	0.0487226	1765	0.03665		1764	0.0052	1764	0.00920925	1764	0.00185
1766	0.04055	1766	0.0435701	1766	0.03309		1765	0.00397	1765	0.00849031	1765	0.00184
1767	0.03567	1767	0.0387176	1767	0.02973		1766	0.00254	1766	0.00777137	1766	0.00202
1768	0.03098	1768	0.0340651	1768	0.02647		1767	0.00111	1767	0.00715242	1767	0.0023
1769	0.02659	1769	0.0297126	1769	0.02351		1768	-0.000222209	1768	0.00663348	1768	0.00258
1770	0.0225	1770	0.0256601	1770	0.02055		1769	-0.00155	1769	0.00611454	1769	0.00276
1771	0.01881	1771	0.0220076	1771	0.01789		1770	-0.00298	1770	0.0057956	1770	0.00274
1772	0.01542	1772	0.0186551	1772	0.01543		1771	-0.00431	1771	0.00547666	1771	0.00262
1773	0.01254	1773	0.0158026	1773	0.01327		1772	-0.00564	1772	0.00515771	1772	0.00251
1774	0.00995	1774	0.0132501	1774	0.01131		1773	-0.00687	1773	0.00473877	1773	0.00219
1775	0.00756	1775	0.0108976	1775	0.00965		1774	-0.0081	1774	0.00431983	1774	0.00197
1776	0.00557	1776	0.00894514	1776	0.00808		1775	-0.00923	1775	0.00390089	1775	0.00155
1777	0.00388	1777	0.00729265	1777	0.00652		1776	-0.01026	1776	0.00338195	1776	0.00113
1778	0.00249	1778	0.00594016	1778	0.00526		1777	-0.01109	1777	0.003063	1777	0.000713861
1779	0.0012	1779	0.00468766	1779	0.0042		1778	-0.01162	1778	0.00264406	1778	0.000395392
1780	0.000116667	1780	0.00363517	1780	0.00334		1779	-0.01195	1779	0.00232512	1779	0.000276924
1781	-0.000871667	1781	0.00268268	1781	0.00278		1780	-0.01208	1780	0.00200618	1780	0.000358455
1782	-0.00176	1782	0.00183018	1782	0.00222		1781	-0.01201	1781	0.00158724	1781	0.000439987
1783	-0.00235	1783	0.00127769	1783	0.00186		1782	-0.01174	1782	0.0013683	1782	0.000521518
1784	-0.00274	1784	0.000925199	1784	0.0017		1783	-0.01127	1783	0.00114935	1783	0.00050305
1785	-0.00303	1785	0.000672705	1785	0.00174		1784	-0.0107	1784	0.000830412	1784	0.000384581
1786	-0.00341	1786	0.000320212	1786	0.00208		1785	-0.00973	1785	0.00051147	1785	0.000166113
1787	-0.0038	1787	-3.22809e-05	1787	0.00252		1786	-0.00856	1786	0.000192529	1786	4.76446e-05
1788	-0.00409	1788	-0.000371688	1788	0.00305		1787	-0.00719	1787	-0.000126413	1787	2.91761e-05
1789	-0.00438	1789	-0.000835802	1789	0.00359		1788	-0.00572	1788	-0.000545355	1788	1.07076e-05
1790	-0.00457	1790	-0.00119992	1790	0.00403		1789	-0.00415	1789	-0.000964297	1789	0.000192239
1791	-0.00476	1791	-0.00156403	1791	0.00457		1790	-0.00258	1790	-0.00158324	1790	0.000473771
1792	-0.00504	1792	-0.00202814	1792	0.00521		1791	-0.000910617	1791	-0.00240218	1791	0.000755302
1793	-0.00523	1793	-0.00239226	1793	0.00595		1792	0.000759452	1792	-0.00322112	1792	0.00104
1794	-0.00532	1794	-0.00265637	1794	0.00669		1793	0.00253	1793	-0.00404006	1793	0.00122
1795	-0.00541	1795	-0.00292048	1795	0.00743		1794	0.0043	1794	-0.00465901	1794	0.0012
1796	-0.0055	1796	-0.0031846	1796	0.00797		1795	0.00597	1795	-0.00507795	1795	0.00108
1797	-0.00549	1797	-0.00334871	1797	0.00861		1796	0.00754	1796	-0.00559689	1796	0.00076296
1798	-0.00547	1798	-0.00351283	1798	0.00915		1797	0.00911	1797	-0.00611583	1797	0.000544492
1799	-0.00546	1799	-0.00367694	1799	0.00979		1798	0.01058	1798	-0.00673477	1798	0.000326023
1800	-0.00545	1800	-0.00384105	1800	0.01042		1799	0.01185	1799	-0.00755372	1799	0.000207555
1801	-0.00534	1801	-0.00390517	1801	0.01096		1800	0.01282	1800	-0.00847266	1800	-1.09139e-05
1802	-0.00503	1802	-0.00376928	1802	0.0113		1801	0.01349	1801	-0.0093916	1801	-0.000129382
1803	-0.00462	1803	-0.00353339	1803	0.01144		1802	0.01386	1802	-0.0104105	1802	-0.000247851
1804	-0.0044	1804	-0.00349751	1804	0.01148		1803	0.01413	1803	-0.0114295	1803	-0.000466319
1805	-0.00429	1805	-0.00356162	1805	0.01152		1804	0.0142	1804	-0.0123484	1804	-0.000684788
1806	-0.00418	1806	-0.00362574	1806	0.01166		1805	0.01397	1805	-0.0131674	1805	-0.001
1807	-0.00407	1807	-0.00368985	1807	0.0117		1806	0.01354	1806	-0.0138863	1806	-0.00142
1808	-0.00376	1808	-0.00355396	1808	0.01174		1807	0.01291	1807	-0.0146052	1807	-0.00184
1809	-0.00325	1809	-0.00321808	1809	0.01168		1808	0.01208	1808	-0.0153242	1808	-0.00216
1810	-0.00273	1810	-0.00288219	1810	0.01152		1809	0.01083	1809	-0.0162431	1809	-0.00238
1811	-0.00212	1811	-0.0024463	1811	0.01126		1810	0.01038	1810	-0.0165101	1810	-0.0021
1812	-0.00161	1812	-0.00211042	1812	0.01089		1811	0.01433	1811	-0.0139771	1811	0.00157
1813	-0.0013	1813	-0.00197453	1813	0.01033		1812	0.03088	1812	-0.00234409	1812	0.01475
1814	-0.000886667	1814	-0.00173865	1814	0.00967		1813	0.07124	1813	0.0271889	1813	0.04623
1815	-0.000575	1815	-0.00160276	1815	0.00891		1814	0.14469	1814	0.0822219	1814	0.10301
1816	-0.000263333	1816	-0.00130051	1816	0.00815		1815	0.25354	1815	0.165155	1815	0.18639
1817	0.000148333	1817	-0.000419115	1817	0.00739		1816	0.39269	1816	0.272488	1816	0.29236
1818	0.00056	1818	0.000462276	1818	0.00653		1817	0.55244	1817	0.396921	1817	0.41304
1819	0.000871667	1819	0.00124367	1819	0.00577		1818	0.72339	1818	0.531054	1818	0.54102
1820	0.00108	1820	0.00192506	1820	0.00501		1819	0.89844	1819	0.669187	1819	0.6709
1821	0.00119	1821	0.00250645	1821	0.00435		1820	1.07409	1820	0.80812	1820	0.79977
1822	0.00121	1822	0.00298784	1822	0.00349		1821	1.24824	1821	0.946253	1821	0.92655
1823	0.00112	1823	0.00336923	1823	0.00273		1822	1.41969	1822	1.08239	1822	1.05003
1824	0.00113	1824	0.00385062	1824	0.00206		1823	1.58644	1823	1.21502	1823	1.16901
1825	0.00104	1825	0.00423201	1825	0.0015		1824	1.7463	1824	1.34225	1824	1.28149
1826	0.000953333	1826	0.0046134	1826	0.00114		1825	1.89635	1825	1.46199	1825	1.38566
1827	0.000865	1827	0.0049948	1827	0.0007825		1826	2.0319	1826	1.57052	1826	1.47804
1828	0.000676667	1828	0.00527619	1828	0.000521667		1827	2.14425	1827	1.66145	1827	1.55212
1829	0.000388333	1829	0.00545758	1829	0.000260833		1828	2.2222	1828	1.72608	1828	1.5998
1830	-5.11591e-13	1830	0.00553897	1830	-2.84217e-14		1829	2.25735	1829	1.75722	1829	1.61467
1831	-0.000155	1831	0.00542036	1831	-0.0004925		1830	2.2478	1830	1.75305	1830	1.59565
1832	-0.00051	1832	0.00510175	1832	-0.000885		1831	2.19925	1831	1.71758	1831	1.54713
1833	-0.000965	1833	0.00468314	1833	-0.00118		1832	2.1217	1832	1.65812	1832	1.47731
1834	-0.00142	1834	0.00426453	1834	-0.00127		1833	2.02525	1833	1.58255	1833	1.39429
1835	-0.00178	1835	0.00394592	1835	-0.00126		1834	1.9172	1834	1.49698	1834	1.30406
1836	-0.00203	1836	0.00372731	1836	-0.00115		1835	1.80186	1835	1.40522	1835	1.20984
1837	-0.00249	1837	0.00330871	1837	-0.00105		1836	1.68191	1836	1.30925	1836	1.11362
1838	-0.00314	1838	0.0026901	1838	-0.00094		1837	1.55926	1837	1.21078	1837	1.0167
1839	-0.00389	1839	0.00197149	1839	-0.0009325		1838	1.43641	1838	1.11171	1838	0.92097
1840	-0.00465	1840	0.00125288	1840	-0.00102		1839	1.31606	1839	1.01445	1839	0.82845
1841	-0.00531	1841	0.00063427	1841	-0.00102		1840	1.20061	1840	0.92098	1840	0.74103
1842	-0.00606	1842	-8.43387e-05	1842	-0.00091		1841	1.09176	1841	0.832813	1841	0.65981
1843	-0.00662	1843	-0.000602948	1843	-0.0006025		1842	0.99021	1842	0.750646	1842	0.58499
1844	-0.00717	1844	-0.00112156	1844	5e-06		1843	0.89626	1843	0.674479	1843	0.51636
1845	-0.00752	1845	-0.00144017	1845	0.0006125		1844	0.80951	1844	0.604112	1844	0.45394
1846	-0.00788	1846	-0.00175877	1846	0.00112		1845	0.72977	1845	0.539245	1845	0.39742
1847	-0.00814	1847	-0.00197738	1847	0.00153		1846	0.65682	1846	0.479578	1846	0.3466
1848	-0.00849	1848	-0.00229599	1848	0.00194		1847	0.59037	1847	0.425111	1847	0.30107
1849	-0.00875	1849	-0.0025146	1849	0.00234		1848	0.53012	1848	0.375744	1848	0.26045
1850	-0.009	1850	-0.00273321	1850	0.00275		1849	0.47567	1849	0.331377	1849	0.22443
1851	-0.00916	1851	-0.00285182	1851	0.00326		1850	0.42672	1850	0.291311	1850	0.19231
1852	-0.00921	1852	-0.00287043	1852	0.00377		1851	0.38277	1851	0.255344	1851	0.16379
1853	-0.00907	1853	-0.00268904	1853	0.00427		1852	0.34302	1852	0.223177	1852	0.13846
1854	-0.00902	1854	-0.00260765	1854	0.00478		1853	0.30727	1853	0.19421	1853	0.11614
1855	-0.00907	1855	-0.00262625	1855	0.00539		1854	0.27492	1854	0.168443	1854	0.09642
1856	-0.00913	1856	-0.00264486	1856	0.0061		1855	0.24577	1855	0.145276	1855	0.0789
1857	-0.00929	1857	-0.00276347	1857	0.0068		1856	0.21953	1856	0.124609	1856	0.06337
1858	-0.00944	1858	-0.00288208	1858	0.00751		1857	0.19578	1857	0.106242	1857	0.04975
1859	-0.0096	1859	-0.00300069	1859	0.00822		1858	0.17433	1858	0.0898746	1858	0.03753
1860	-0.00965	1860	-0.00330487	1860	0.00893		1859	0.15508	1859	0.0755076	1859	0.02671
1861	-0.00981	1861	-0.0038891	1861	0.00963		1860	0.13763	1860	0.0630407	1860	0.01709
1862	-0.00976	1862	-0.00427333	1862	0.01054		1861	0.12168	1861	0.0521737	1861	0.00866
1863	-0.00971	1863	-0.00465756	1863	0.01145		1862	0.10713	1862	0.0428067	1862	0.00134
1864	-0.00957	1864	-0.00494179	1864	0.01226		1863	0.09378	1863	0.0345397	1863	-0.00488
1865	-0.00933	1865	-0.00512602	1865	0.01306		1864	0.08173	1864	0.0272727	1864	-0.0104
1866	-0.00908	1866	-0.00531025	1866	0.01377		1865	0.07078	1865	0.0209057	1865	-0.01513
1867	-0.00874	1867	-0.00539447	1867	0.01448		1866	0.06103	1866	0.0154388	1866	-0.01925
1868	-0.00839	1868	-0.0054787	1868	0.01509		1867	0.05209	1867	0.0107718	1867	-0.02267
1869	-0.00795	1869	-0.00546293	1869	0.01559		1868	0.04414	1868	0.00700479	1868	-0.02549
1870	-0.0073	1870	-0.00524716	1870	0.016		1869	0.03689	1869	0.00383781	1869	-0.02771
1871	-0.00665	1871	-0.00503139	1871	0.01631		1870	0.03044	1870	0.00147082	1870	-0.02954
1872	-0.00611	1872	-0.00491562	1872	0.01662		1871	0.02469	1871	-0.000496164	1871	-0.03076
1873	-0.00547	1873	-0.00469985	1873	0.01692		1872	0.01964	1872	-0.00196315	1872	-0.03148
1874	-0.00492	1874	-0.00458407	1874	0.01703		1873	0.01519	1873	-0.00323013	1873	-0.0318
1875	-0.00428	1875	-0.0043683	1875	0.01714		1874	0.01134	1874	-0.00409712	1874	-0.03183
1876	-0.00363	1876	-0.00415253	1876	0.01714		1875	0.00819	1875	-0.0047641	1875	-0.03155
1877	-0.00309	1877	-0.00403676	1877	0.01705		1876	0.00564	1876	-0.00503109	1876	-0.03097
1878	-0.00254	1878	-0.00392099	1878	0.01686		1877	0.0037	1877	-0.00509807	1877	-0.03029
1879	-0.0021	1879	-0.00390522	1879	0.01647		1878	0.00225	1878	-0.00476505	1878	-0.02941
1880	-0.00165	1880	-0.00388945	1880	0.01607		1879	0.0015	1879	-0.00433204	1879	-0.02824
1881	-0.00131	1881	-0.00397367	1881	0.01558		1880	0.00115	1880	-0.00359902	1880	-0.02686
1882	-0.00106	1882	-0.0041579	1882	0.01499		1881	0.0011	1881	-0.00266601	1881	-0.02548
1883	-0.00101	1883	-0.00454213	1883	0.0144		1882	0.00145	1882	-0.00153299	1882	-0.0241
1884	-0.00117	1884	-0.00500125	1884	0.0138		1883	0.0022	1883	-0.000599976	1883	-0.02293
1885	-0.00123	1885	-0.0051289	1885	0.01321		1884	0.00335	1884	0.00033304	1884	-0.02155
1886	-0.00128	1886	-0.00525655	1886	0.01262		1885	0.0049	1885	0.00106606	1885	-0.02027
1887	-0.00124	1887	-0.0052842	1887	0.01193		1886	0.00685	1886	0.00179907	1886	-0.01889
1888	-0.00109	1888	-0.00521184	1888	0.01113		1887	0.009	1887	0.00273209	1887	-0.01762
1889	-0.000945	1889	-0.00513949	1889	0.01004		1888	0.01136	1888	0.0037651	1888	-0.01624
1890	-0.0009	1890	-0.00516714	1890	0.00885		1889	0.01381	1889	0.00509812	1889	-0.01486
1891	-0.000755	1891	-0.00509479	1891	0.00776		1890	0.01636	1890	0.00643113	1890	-0.01348
1892	-0.00081	1892	-0.00522244	1892	0.00666		1891	0.01901	1891	0.00766415	1891	-0.0122
1893	-0.000765	1893	-0.00525009	1893	0.00577		1892	0.02166	1892	0.00879716	1892	-0.01103
1894	-0.00082	1894	-0.00537773	1894	0.00498		1893	0.02431	1893	0.00973018	1893	-0.01005
1895	-0.000775	1895	-0.00540538	1895	0.00429		1894	0.02696	1894	0.0103632	1894	-0.00907
1896	-0.00083	1896	-0.00553303	1896	0.00359		1895	0.02951	1895	0.0108962	1895	-0.00809
1897	-0.000885	1897	-0.00566068	1897	0.0029		1896	0.03196	1896	0.0114292	1896	-0.00702
1898	-0.00084	1898	-0.00568833	1898	0.00211		1897	0.03431	1897	0.0120622	1897	-0.00584
1899	-0.000595	1899	-0.00551598	1899	0.00142		1898	0.03656	1898	0.0128953	1898	-0.00466
1900	-0.00035	1900	-0.00534362	1900	0.000825		1899	0.03842	1899	0.0138283	1899	-0.00378
1901	-0.000105	1901	-0.00517127	1901	0.0003325		1900	0.04007	1900	0.0149613	1900	-0.003
1902	4e-05	1902	-0.00509892	1902	-6e-05		1901	0.04132	1901	0.0161943	1901	-0.00223
1903	8.5e-05	1903	-0.00512657	1903	-0.0001525		1902	0.04227	1902	0.0172273	1902	-0.00155
1904	3e-05	1904	-0.00525422	1904	-4.5e-05		1903	0.04292	1903	0.0180603	1903	-0.000770799
1905	-0.000125	1905	-0.00548187	1905	0.0001625		1904	0.04327	1904	0.0187934	1904	-9.30316e-05
1906	-0.00028	1906	-0.00570951	1906	0.00037		1905	0.04312	1905	0.0195264	1905	0.000484735
1907	-0.000235	1907	-0.00573716	1907	0.0004775		1906	0.04267	1906	0.0201594	1906	0.00106
1908	-0.00019	1908	-0.00576481	1908	0.000485		1907	0.04202	1907	0.0209924	1907	0.00164
1909	-4.5e-05	1909	-0.00569246	1909	0.0001925		1908	0.04117	1908	0.0220254	1908	0.00222
1910	0	1910	-0.00572011	1910	-3.97904e-13		1909	0.04002	1909	0.0231584	1909	0.0028
1911	-0.0008575	1911	-0.00574776	1911	0.0002125		1910	0.03868	1910	0.0244914	1910	0.00337
1912	-0.00162	1912	-0.0056754	1912	0.000325		1911	0.03693	1911	0.0257245	1911	0.00385
1913	-0.00137	1913	-0.00460305	1913	0.0003375		1912	0.03498	1912	0.0267575	1912	0.00413
1914	0.00107	1914	-0.0013307	1914	0.00095		1913	0.03283	1913	0.0275905	1913	0.00441
1915	0.00781	1915	0.00624165	1915	0.00346		1914	0.03048	1914	0.0282235	1914	0.00478
1916	0.02065	1916	0.0048364	1916	0.00908		1915	0.02813	1915	0.0288565	1915	0.00516
1917	0.0403	1917	0.00854005	1917	0.01879		1916	0.02578	1916	0.0292895	1916	0.00564
1918	0.06684	1918	0.0350329	1918	0.0329		1917	0.02333	1917	0.0298226	1917	0.00592
1919	0.09888	1919	0.067336	1919	0.05101		1918	0.02108	1918	0.0302556	1918	0.0059
1920	0.13492	1920	0.103639	1920	0.07243		1919	0.01883	1919	0.0306886	1919	0.00577
1921	0.17357	1921	0.142542	1921	0.09624		1920	0.01669	1920	0.0310216	1920	0.00565
1922	0.21391	1922	0.183146	1922	0.12165		1921	0.01474	1921	0.0313546	1921	0.00573
1923	0.25505	1923	0.224549	1923	0.14806		1922	0.01289	1922	0.0317876	1922	0.00571
1924	0.29679	1924	0.266552	1924	0.17498		1923	0.01124	1923	0.0321206	1923	0.00578
1925	0.33834	1925	0.308355	1925	0.20219		1924	0.00979	1924	0.0325537	1924	0.00576
1926	0.37948	1926	0.349758	1926	0.2294		1925	0.00874	1925	0.0327867	1925	0.00564
1927	0.41932	1927	0.389861	1927	0.25651		1926	0.00809	1926	0.0329197	1926	0.00552
1928	0.45666	1928	0.427465	1928	0.28323		1927	0.00774	1927	0.0330527	1927	0.0056
1929	0.48981	1929	0.460868	1929	0.30824		1928	0.00769	1928	0.0331857	1928	0.00587
1930	0.51655	1930	0.487871	1930	0.33005		1929	0.00794	1929	0.0332187	1929	0.00615
1931	0.53519	1931	0.506774	1931	0.34716		1930	0.00829	1930	0.0331518	1930	0.00643
1932	0.54503	1932	0.516877	1932	0.35848		1931	0.00885	1931	0.0329848	1931	0.00661
1933	0.54638	1933	0.51848	1933	0.36389		1932	0.0096	1932	0.0328178	1932	0.00678
1934	0.54032	1934	0.512683	1934	0.3638		1933	0.01055	1933	0.0326508	1933	0.00696
1935	0.52856	1935	0.501187	1935	0.35921		1934	0.0118	1934	0.0323838	1934	0.00724
1936	0.5124	1936	0.48529	1936	0.35093		1935	0.01315	1935	0.0322168	1935	0.00742
1937	0.49285	1937	0.465993	1937	0.33984		1936	0.0147	1936	0.0319499	1936	0.0075
1938	0.47069	1938	0.444096	1938	0.32655		1937	0.01635	1937	0.0317829	1937	0.00757
1939	0.44663	1939	0.420299	1939	0.31146		1938	0.0178	1938	0.0314159	1938	0.00765
1940	0.42137	1940	0.395302	1940	0.29508		1939	0.01915	1939	0.0310489	1939	0.00793
1941	0.39562	1941	0.369806	1941	0.27779		1940	0.0203	1940	0.0306819	1940	0.00831
1942	0.36996	1942	0.344409	1942	0.26		1941	0.02125	1941	0.0304149	1941	0.00858
1943	0.3447	1943	0.319412	1943	0.24191		1942	0.02221	1942	0.0301479	1942	0.00866
1944	0.32044	1944	0.295415	1944	0.22383		1943	0.02296	1943	0.029881	1943	0.00864
1945	0.29729	1945	0.272518	1945	0.20624		1944	0.02371	1944	0.029814	1944	0.00852
1946	0.27543	1946	0.250921	1946	0.18945		1945	0.02426	1945	0.029647	1945	0.0085
1947	0.25487	1947	0.230625	1947	0.17356		1946	0.02471	1946	0.02948	1946	0.00847
1948	0.23541	1948	0.211428	1948	0.15878		1947	0.02496	1947	0.029213	1947	0.00865
1949	0.21706	1949	0.193331	1949	0.14479		1948	0.02501	1948	0.028946	1948	0.00873
1950	0.1998	1950	0.176334	1950	0.1317		1949	0.02476	1949	0.0286791	1949	0.00881
1951	0.18374	1951	0.160537	1951	0.11961		1950	0.02431	1950	0.0284121	1950	0.00878
1952	0.16898	1952	0.14604	1952	0.10843		1951	0.02346	1951	0.0280451	1951	0.00876
1953	0.15553	1953	0.132844	1953	0.09824		1952	0.02232	1952	0.0276781	1952	0.00854
1954	0.14327	1954	0.120847	1954	0.08905		1953	0.02117	1953	0.0271111	1953	0.00822
1955	0.13171	1955	0.10955	1955	0.08066		1954	0.01982	1954	0.0264441	1954	0.0077
1956	0.12086	1956	0.0989531	1956	0.07298		1955	0.01857	1955	0.0255772	1955	0.00717
1957	0.1107	1957	0.0890563	1957	0.06579		1956	0.01712	1956	0.0246102	1956	0.00675
1958	0.10114	1958	0.0797594	1958	0.0594		1957	0.01557	1957	0.0237432	1957	0.00623
1959	0.09238	1959	0.0712626	1959	0.05361		1958	0.01382	1958	0.0228762	1958	0.00581
1960	0.08422	1960	0.0633657	1960	0.04853		1959	0.01213	1959	0.0221092	1959	0.00527
1961	0.07667	1961	0.0560689	1961	0.04384		1960	0.01034	1960	0.0212901	1960	0.00473
1962	0.06951	1962	0.0491721	1962	0.03965		1961	0.00835	1961	0.020371	1961	0.00409
1963	0.06285	1963	0.0427752	1963	0.03586		1962	0.00626	1962	0.0194519	1962	0.00355
1964	0.05679	1964	0.0369784	1964	0.03228		1963	0.00437	1963	0.0185328	1963	0.00301
1965	0.05124	1965	0.0316816	1965	0.02899		1964	0.00258	1964	0.0177137	1964	0.00257
1966	0.04608	1966	0.0267847	1966	0.026		1965	0.000986254	1965	0.0168946	1965	0.00223
1967	0.04122	1967	0.0221879	1967	0.02331		1966	-0.000404396	1966	0.0160755	1966	0.002
1968	0.03666	1968	0.0178911	1968	0.02073		1967	-0.0018	1967	0.0152564	1967	0.00176
1969	0.03251	1969	0.0139942	1969	0.01834		1968	-0.00309	1968	0.0144373	1968	0.00152
1970	0.02875	1970	0.0104974	1970	0.01615		1969	-0.00428	1969	0.0136182	1969	0.00128
1971	0.02549	1971	0.00750055	1971	0.01406		1970	-0.00537	1970	0.012999	1970	0.000940836
1972	0.02274	1972	0.00500372	1972	0.01238		1971	-0.00636	1971	0.0122799	1971	0.00050204
1973	0.02028	1973	0.00288325	1973	0.01089		1972	-0.00705	1972	0.0116608	1972	6.32442e-05
1974	0.01792	1974	0.000875218	1974	0.0096		1973	-0.00744	1973	0.0109417	1973	-0.000275552
1975	0.01586	1975	-0.000832814	1975	0.00861		1974	-0.00753	1974	0.0102226	1974	-0.000514347
1976	0.014	1976	-0.00234085	1976	0.00793		1975	-0.00732	1975	0.00950352	1975	-0.000653143
1977	0.01255	1977	-0.00344888	1977	0.00734		1976	-0.00691	1976	0.00898441	1976	-0.000791939
1978	0.01139	1978	-0.00425691	1978	0.00695		1977	-0.0062	1977	0.00856531	1977	-0.000930735
1979	0.01063	1979	-0.00466494	1979	0.00666		1978	-0.00549	1978	0.0080462	1978	-0.00127
1980	0.01008	1980	-0.00487297	1980	0.00647		1979	-0.00488	1979	0.0075271	1979	-0.00161
1981	0.00982	1981	-0.00478101	1981	0.00629		1980	-0.00427	1980	0.00690799	1980	-0.00195
1982	0.00956	1982	-0.00468904	1982	0.0061		1981	-0.00356	1981	0.00618889	1981	-0.00229
1983	0.0094	1983	-0.00449707	1983	0.00601		1982	-0.00265	1982	0.00556978	1982	-0.00252
1984	0.00915	1984	-0.0044051	1984	0.00593		1983	-0.00155	1983	0.00505067	1983	-0.00286
1985	0.00889	1985	-0.00431313	1985	0.00574		1984	-0.000236094	1984	0.00473157	1984	-0.0031
1986	0.00873	1986	-0.00412116	1986	0.00575		1985	0.00107	1985	0.00441246	1985	-0.00324
1987	0.00837	1987	-0.0041292	1987	0.00586		1986	0.00248	1986	0.00399336	1986	-0.00328
1988	0.00802	1988	-0.00413723	1988	0.00608		1987	0.00369	1987	0.00337425	1987	-0.00322
1989	0.00776	1989	-0.00404526	1989	0.00629		1988	0.0048	1988	0.00265514	1988	-0.00306
1990	0.0074	1990	-0.00405329	1990	0.0063		1989	0.00581	1989	0.00183604	1989	-0.0029
1991	0.00694	1991	-0.00416132	1991	0.00601		1990	0.00692	1990	0.00101693	1990	-0.00284
1992	0.00659	1992	-0.00416936	1992	0.00552		1991	0.00793	1991	0.000297827	1991	-0.00287
1993	0.00593	1993	-0.00447739	1993	0.00474		1992	0.00874	1992	-0.000421279	1992	-0.00281
1994	0.00527	1994	-0.00478542	1994	0.00385		1993	0.00945	1993	-0.00104038	1993	-0.00275
1995	0.00441	1995	-0.00529345	1995	0.00306		1994	0.01006	1994	-0.00175949	1994	-0.00269
1996	0.00366	1996	-0.00570148	1996	0.00217		1995	0.01057	1995	-0.0024786	1995	-0.00263
[truncated: 5,805 more rows]

## Sheet: (d) Raffinose binding ITC
Fig. 1 (d) Raffinose binding ITC
WT MelBSt ITC thermogram							D59C mutant ITC thermogram							WT melBSt curve fitting									D59C mutant curve fitting										WT MelBSt (n=2)								D59C mutant (n=2)
	Test1		Test 2		control			Test1		Test 2		control		Test1				Test 2					Test1				Test 2
Time (s)	Corrected Heat Rate (µJ/s)	Time (s)	Corrected Heat Rate (µJ/s)	Time (s)	Corrected Heat Rate (µJ/s)		Time (s)	Corrected Heat Rate (µJ/s)	Time (s)	Corrected Heat Rate (µJ/s)	Time (s)	Corrected Heat Rate (µJ/s)		Mole Ratio	Q (µJ)	Mole Ratio	Fit (µJ)	Mole Ratio	Q (µJ)	Mole Ratio	Fit (µJ)		Mole Ratio	Q (µJ)	Mole Ratio	Fit (µJ)	Mole Ratio	Q (µJ)	Mole Ratio	Fit (µJ)					Test 1	Test 2								Test 1	Test 2
1	0.0376493	1	-0.00666209	1	-8.42134e-06		0	-0.02514	0	-0.0112409	0	-0.00298		3.51506	-4.19398	3.49291	-4.52081	3.51506	-4.94655	3.49291	-5.86206		19.5	-28.9686	19.4102	-30.4188	19.5	-30.455	19.4102	-32.0901			Model	Variable	Value	Value	Avg	SD	SE			Model	Variable	Value	Value	Avg	SD	SE
2	0.0377493	2	-0.00656209	2	-0.000108421		1	-0.02534	1	-0.0111409	1	-0.00288		5.30949	-4.04209	3.67009	-4.48259	5.30949	-4.84706	3.67009	-5.80276		35.2702	-24.3965	21.3601	-29.585	35.2702	-26.0786	21.3601	-31.2307			Independent	Kd (M)	0.004314	0.00326	0.003787	0.000745291	0.000527			Independent	Kd (M)	0.01151	0.01118	0.011345	0.000233345	0.000165
3	0.0379493	3	-0.00636209	3	0.00134		2	-0.02564	2	-0.0110409	2	-0.00298		7.12897	-4.09167	3.84752	-4.4448	7.12897	-5.55825	3.84752	-5.74427		51.2363	-21.1766	23.313	-28.7837	51.2363	-22.7931	23.313	-30.404				n	1	1							n	1	1
4	0.0382493	4	-0.00606209	4	0.00196		3	-0.02584	3	-0.0109409	3	-0.00298		8.97385	-3.50996	4.0252	-4.40743	8.97385	-5.22029	4.0252	-5.68656		67.4007	-18.203	25.269	-28.0132	67.4007	-18.8732	25.269	-29.6083				ΔH (kJ/mol)	-11.22	-11.36							ΔH (kJ/mol)	-27.5	-25.43
5	0.0387493	5	-0.00556209	5	0.00248		4	-0.02604	4	-0.0110409	4	-0.00298		10.8445	-3.2684	4.20311	-4.37048	10.8445	-3.43995	4.20311	-5.62962		83.7659	-15.2925	27.2279	-27.272	83.7659	-16.3289	27.2279	-28.8421				Ka (Mˉ¹)	231.8	306.7							Ka (Mˉ¹)	86.87	89.42
6	0.0392493	6	-0.00506209	6	0.0027		5	-0.02614	5	-0.0110409	5	-0.00298		12.7413	-3.35154	4.38128	-4.33393	12.7413	-3.81452	4.38128	-5.57345		100.334	-13.3054	29.1899	-26.5587	100.334	-12.9395	29.1899	-28.1041				-TΔS (kJ/mol)	-2.28	-2.838							-TΔS (kJ/mol)	16.43	14.29
7	0.0398493	7	-0.00446209	7	0.00272		6	-0.02634	6	-0.0110409	6	-0.00298		14.6645	-3.14031	4.55969	-4.29779	14.6645	-3.47245	4.55969	-5.51803		117.109	-10.7265	31.1548	-25.8718	117.109	-12.3434	31.1548	-27.3929				ΔG (kJ/mol)	-13.5	-14.19							ΔG (kJ/mol)	-11.07	-11.14
8	0.0402493	8	-0.00406209	8	0.00254		7	-0.02664	7	-0.0110409	7	-0.00288		16.6146	-2.75539	4.73834	-4.26204	16.6146	-4.4097	4.73834	-5.46334		134.092	-9.99207	33.1228	-25.2101	134.092	-10.6788	33.1228	-26.7073				ΔS (J/mol·K)	7.647	9.518							ΔS (J/mol·K)	-55.1	-47.93
9	0.0404493	9	-0.00386209	9	0.00207		8	-0.02694	8	-0.0110409	8	-0.00278		18.5919	-2.17176	4.91725	-4.22668	18.5919	-3.02913	4.91725	-5.40938		151.285	-8.41962	35.0938	-24.5725	151.285	-9.4523	35.0938	-26.0459
10	0.0407493	10	-0.00356209	10	0.00159		9	-0.02734	9	-0.0111409	9	-0.00258		20.5969	-2.39907	5.0964	-4.19171	20.5969	-2.26623	5.0964	-5.35613		168.692	-5.94889	37.0678	-23.9577	168.692	-7.42716	37.0678	-25.4078
11	0.0410493	11	-0.00326209	11	0.00101		10	-0.02764	10	-0.0112409	10	-0.00248		22.6298	-1.89625	5.27579	-4.15712	22.6298	-2.22641	5.27579	-5.30357		186.316	-6.82037	39.0449	-23.3647	186.316	-8.00511	39.0449	-24.7918
12	0.0415493	12	-0.00276209	12	0.00032963		11	-0.02804	11	-0.0113409	11	-0.00228		24.6911	-1.61828	5.45544	-4.1229	24.6911	-2.46132	5.45544	-5.25171		204.158	-4.27478	41.025	-22.7926	204.158	-5.69086	41.025	-24.197
13	0.0419493	13	-0.00279143	13	-0.00044891		12	-0.02824	12	-0.0113409	12	-0.00208		26.7812	-2.06554	5.63533	-4.08906	26.7812	-2.38947	5.63533	-5.20052		222.222	-4.25152	43.0081	-22.2403	222.222	-4.89861	43.0081	-23.6224
14	0.0425493	14	-0.00243078	14	-0.00123		13	-0.02854	13	-0.0112409	13	-0.00188		28.9005	-1.74082	5.81547	-4.05558	28.9005	-2.79766	5.81547	-5.15		240.511	-3.89282	44.9943	-21.707	240.511	-4.41045	44.9943	-23.0672
15	0.0431493	15	-0.00207012	15	-0.00211		14	-0.02864	14	-0.0110409	14	-0.00178		31.0494	-2.19235	5.99585	-4.02245	31.0494	-1.95746	5.99585	-5.10013		259.027	-3.9233	46.9836	-21.1918	259.027	-3.22239	46.9836	-22.5304
16	0.0437493	16	-0.00170947	16	-0.00288		15	-0.02884	15	-0.0107409	15	-0.00168		33.2283	-2.03388	6.17649	-3.98969	33.2283	-1.48109	6.17649	-5.05091		277.772	-1.75843	48.9759	-20.6939	277.772	-2.26778	48.9759	-22.0113
17	0.0442493	17	-0.00144882	17	-0.00366		16	-0.02894	16	-0.0105409	16	-0.00158		35.4376	-0.953291	6.35738	-3.95727	35.4376	-1.80845	6.35738	-5.00232		296.751	-3.66672	50.9712	-20.2126	296.751	-2.19221	50.9712	-21.5091
18	0.0447493	18	-0.00118817	18	-0.00444		17	-0.02914	17	-0.0103409	17	-0.00138		37.6777	-1.3253	6.53851	-3.9252	37.6777	-1.30136	6.53851	-4.95435		315.965	-1.92989	52.9696	-19.7471	315.965	-2.34211	52.9696	-21.0232
19	0.0451493	19	-0.00102752	19	-0.00512		18	-0.02934	18	-0.0102409	18	-0.00128		39.9492	-0.326688	6.7199	-3.89348	39.9492	-1.5076	6.7199	-4.907		335.418	-1.59386	54.9711	-19.2968	335.418	-1.94004	54.9711	-20.5527
20	0.0455493	20	-0.000866872	20	-0.0056		19	-0.02944	19	-0.0101409	19	-0.00118				6.90153	-3.86209			6.90153	-4.86025		355.113	-2.1351	56.9757	-18.861	355.113	-1.63375	56.9757	-20.0972
21	0.0458493	21	-0.000806222	21	-0.00598		20	-0.02954	20	-0.0099409	20	-0.00108				7.08342	-3.83103			7.08342	-4.81409		375.052	-2.41417	58.9833	-18.4392	375.052	-1.87322	58.9833	-19.6559
22	0.0461493	22	-0.000745572	22	-0.00616		21	-0.02964	21	-0.0098409	21	-0.00108				7.26555	-3.80029			7.26555	-4.76851		395.239	-1.05683	60.9941	-18.0306	395.239	-1.5251	60.9941	-19.2283
23	0.0466493	23	-0.000484921	23	-0.00613		22	-0.02954	22	-0.0097409	22	-0.000977939				7.44794	-3.76988			7.44794	-4.72351		415.677	-1.02565	63.0079	-17.6349	415.677	-1.10422	63.0079	-18.8139
24	0.0473493	24	-2.42707e-05	24	-0.00601		23	-0.02934	23	-0.0095409	23	-0.000977939				7.63058	-3.73979			7.63058	-4.67908		436.368	-0.90329	65.0248	-17.2515	436.368	-1.08467	65.0248	-18.412
25	0.0479493	25	0.00033638	25	-0.00579		24	-0.02904	24	-0.0093409	24	-0.000877939				7.81347	-3.71002			7.81347	-4.6352				67.0448	-16.8798			67.0448	-18.0223
26	0.0484493	26	0.00059703	26	-0.00537		25	-0.02864	25	-0.0089409	25	-0.000977939				7.99661	-3.68056			7.99661	-4.59187				69.0679	-16.5195			69.0679	-17.6442
27	0.0487493	27	0.000657681	27	-0.00465		26	-0.02824	26	-0.0086409	26	-0.00108				8.18001	-3.6514			8.18001	-4.54908				71.0941	-16.17			71.0941	-17.2774
28	0.0487493	28	0.000418331	28	-0.00373		27	-0.02784	27	-0.0083409	27	-0.00118				8.36366	-3.62254			8.36366	-4.50682				73.1235	-15.8309			73.1234	-16.9213
29	0.0486493	29	7.89814e-05	29	-0.00241		28	-0.02744	28	-0.0081409	28	-0.00128				8.54756	-3.59399			8.54756	-4.46508				75.1559	-15.5019			75.1559	-16.5755
30	0.0485493	30	-7.29266e-05	30	-0.000984088		29	-0.02714	29	-0.0080409	29	-0.00138				8.73171	-3.56572			8.73171	-4.42386				77.1915	-15.1825			77.1915	-16.2397
31	0.0485493	31	0.000244979	31	0.000637372		30	-0.02694	30	-0.0081409	30	-0.00138				8.91612	-3.53775			8.91612	-4.38314				79.2302	-14.8724			79.2302	-15.9135
32	0.0485493	32	0.000562884	32	0.000783013		31	-0.02674	31	-0.0081409	31	-0.00148				9.10079	-3.51007			9.10079	-4.34292				81.272	-14.5712			81.272	-15.5965
33	0.0484493	33	0.000780789	33	0.000416237		32	-0.02654	32	-0.0082409	32	-0.00148				9.2857	-3.48267			9.2857	-4.30319				83.317	-14.2787			83.317	-15.2884
34	0.0481493	34	0.000798695	34	0.000249461		33	-0.02624	33	-0.0083409	33	-0.00158				9.47088	-3.45555			9.47088	-4.26394				85.3651	-13.9944			85.3651	-14.9888
35	0.0476493	35	0.0006166	35	8.2685e-05		34	-0.02604	34	-0.0084409	34	-0.00168				9.6563	-3.4287			9.6563	-4.22517				87.4163	-13.718			87.4163	-14.6976
36	0.0470493	36	0.000334505	36	0.000115909		35	-0.02574	35	-0.0085409	35	-0.00178				9.84199	-3.40213			9.84199	-4.18687				89.4707	-13.4494			89.4707	-14.4143
37	0.0464493	37	5.24108e-05	37	4.91331e-05		36	-0.02544	36	-0.0087409	36	-0.00188				10.0279	-3.37583			10.0279	-4.14903				91.5283	-13.1882			91.5283	-14.1386
38	0.0457493	38	-0.000329684	38	8.23571e-05		37	-0.02514	37	-0.0090409	37	-0.00198				10.2141	-3.34979			10.2141	-4.11164				93.589	-12.9341			93.589	-13.8704
39	0.0451493	39	-0.000611779	39	0.000115581		38	-0.02474	38	-0.0093409	38	-0.00188				10.4006	-3.32401			10.4006	-4.0747				95.6529	-12.6868			95.6529	-13.6094
40	0.0444493	40	-0.000993873	40	0.000248805		39	-0.02434	39	-0.0097409	39	-0.00178				10.5873	-3.2985			10.5873	-4.0382				97.7199	-12.4463			97.7199	-13.3552
41	0.0438493	41	-0.00127597	41	0.000482029		40	-0.02414	40	-0.0100409	40	-0.00168				10.7743	-3.27324			10.7743	-4.00213				99.7902	-12.2121			99.7902	-13.1077
42	0.0432493	42	-0.00155806	42	0.000715253		41	-0.02384	41	-0.0103409	41	-0.00158				10.9615	-3.24823			10.9615	-3.96649				101.864	-11.9841			101.864	-12.8667
43	0.0427493	43	-0.00174016	43	0.000848477		42	-0.02364	42	-0.0107409	42	-0.00158				11.149	-3.22347			11.149	-3.93127				103.94	-11.7622			103.94	-12.6318
44	0.0422493	44	-0.00192225	44	0.000981701		43	-0.02324	43	-0.0111409	43	-0.00158				11.3367	-3.19896			11.3367	-3.89647				106.02	-11.5459			106.02	-12.403
45	0.0417493	45	-0.00210435	45	0.00101		44	-0.02274	44	-0.0113409	44	-0.00158				11.5247	-3.17469			11.5247	-3.86207				108.103	-11.3353			108.103	-12.18
46	0.0411493	46	-0.00238644	46	0.00105		45	-0.02204	45	-0.0115409	45	-0.00158				11.713	-3.15066			11.713	-3.82808				110.189	-11.1301			110.189	-11.9626
47	0.0406493	47	-0.00256854	47	0.00118		46	-0.02154	46	-0.0116409	46	-0.00158				11.9015	-3.12687			11.9015	-3.79448				112.278	-10.93			112.278	-11.7507
48	0.0401493	48	-0.00275063	48	0.00111		47	-0.02104	47	-0.0116409	47	-0.00168				12.0903	-3.10331			12.0903	-3.76128				114.371	-10.735			114.371	-11.544
49	0.0397493	49	-0.00283273	49	0.000947822		48	-0.02054	48	-0.0116409	48	-0.00178				12.2793	-3.07998			12.2793	-3.72846				116.467	-10.5449			116.467	-11.3424
50	0.0395493	50	-0.00271482	50	0.000581046		49	-0.02014	49	-0.0116409	49	-0.00188				12.4686	-3.05689			12.4686	-3.69601				118.566	-10.3595			118.566	-11.1458
51	0.0395493	51	-0.00239691	51	-8.57303e-05		50	-0.01964	50	-0.0116409	50	-0.00198				12.6582	-3.03401			12.6582	-3.66395				120.668	-10.1787			120.668	-10.9539
52	0.0396493	52	-0.00197901	52	-0.000752506		51	-0.01924	51	-0.0115409	51	-0.00208				12.848	-3.01136			12.848	-3.63225				122.774	-10.0023			122.774	-10.7666
53	0.0397493	53	-0.0015611	53	-0.00117		52	-0.01904	52	-0.0114409	52	-0.00218				13.0381	-2.98893			13.0381	-3.60091				124.882	-9.83014			124.882	-10.5838
54	0.0397493	54	-0.0012432	54	-0.00041935		53	-0.01894	53	-0.0114409	53	-0.00238				13.2284	-2.96672			13.2284	-3.56993				126.994	-9.66215			126.994	-10.4054
55	0.0396493	55	-0.00102529	55	0.000227251		54	-0.01894	54	-0.0114409	54	-0.00248				13.419	-2.94472			13.419	-3.5393				129.11	-9.49818			129.11	-10.2311
56	0.0396493	56	-0.000707388	56	0.000773851		55	-0.01904	55	-0.0115409	55	-0.00248				13.6099	-2.92294			13.6099	-3.50902				131.228	-9.3381			131.228	-10.0609
57	0.0396493	57	-0.000389483	57	0.00112		56	-0.01904	56	-0.0116409	56	-0.00258				13.801	-2.90136			13.801	-3.47908				133.35	-9.18178			133.35	-9.89473
58	0.0396493	58	-7.15773e-05	58	0.00117		57	-0.01904	57	-0.0117409	57	-0.00278				13.9924	-2.88			13.9924	-3.44948				135.475	-9.02913			135.475	-9.73234
59	0.0396493	59	0.000246328	59	0.00111		58	-0.01904	58	-0.0118409	58	-0.00298				14.1841	-2.85883			14.1841	-3.42022				137.603	-8.88002			137.603	-9.57368
60	0.0394493	60	0.000364233	60	0.00106		59	-0.01904	59	-0.0119409	59	-0.00328				14.376	-2.83787			14.376	-3.39128				139.734	-8.73434			139.734	-9.41863
61	0.0391493	61	0.000382139	61	0.000906855		60	-0.01924	60	-0.0117409	60	-0.00348				14.5682	-2.81711			14.5682	-3.36266				141.869	-8.59201			141.869	-9.26708
62	0.0389493	62	0.000500044	62	0.000853455		61	-0.01944	61	-0.0115409	61	-0.00358				14.7607	-2.79654			14.7607	-3.33436				144.007	-8.4529			144.007	-9.11892
63	0.0387493	63	0.000617949	63	0.000700056		62	-0.01944	62	-0.0112409	62	-0.00348				14.9534	-2.77617			14.9534	-3.30638				146.149	-8.31694			146.149	-8.97407
64	0.0386493	64	0.000828277	64	0.000546657		63	-0.01934	63	-0.0111409	63	-0.00338				15.1464	-2.75599			15.1464	-3.27871				148.293	-8.18403			148.293	-8.83242
65	0.0385493	65	0.000916397	65	0.000493257		64	-0.01924	64	-0.0111409	64	-0.00328				15.3397	-2.73601			15.3397	-3.25134				150.441	-8.05408			150.441	-8.69389
66	0.0384493	66	0.00100452	66	0.000439858		65	-0.01914	65	-0.0112409	65	-0.00318				15.5332	-2.71621			15.5332	-3.22427				152.592	-7.927			152.592	-8.55838
67	0.0380493	67	0.000792638	67	0.000386459		66	-0.01904	66	-0.0113409	66	-0.00328				15.727	-2.6966			15.727	-3.19751				154.747	-7.80272			154.747	-8.42581
68	0.0375493	68	0.000480758	68	0.000433059		67	-0.01894	67	-0.0113409	67	-0.00338				15.921	-2.67717			15.921	-3.17103				156.905	-7.68114			156.905	-8.2961
69	0.0371493	69	0.000268878	69	0.00037966		68	-0.01864	68	-0.0112409	68	-0.00348				16.1153	-2.65792			16.1153	-3.14484				159.066	-7.56221			159.066	-8.16916
70	0.0369493	70	0.000256999	70	0.000226261		69	-0.01824	69	-0.0110409	69	-0.00358				16.3099	-2.63885			16.3099	-3.11894				161.23	-7.44583			161.23	-8.04493
71	0.0368493	71	0.000345119	71	-2.71388e-05		70	-0.01764	70	-0.0107409	70	-0.00368				16.5048	-2.61996			16.5048	-3.09332				163.398	-7.33194			163.398	-7.92332
72	0.0368493	72	0.00053324	72	-0.000380538		71	-0.01714	71	-0.0104409	71	-0.00348				16.6999	-2.60124			16.6999	-3.06797				165.569	-7.22048			165.569	-7.80426
73	0.0368493	73	0.00072136	73	-0.000833937		72	-0.01664	72	-0.0100409	72	-0.00318				16.8953	-2.5827			16.8953	-3.0429				167.744	-7.11137			167.744	-7.68768
74	0.0369493	74	0.00100948	74	-0.00119		73	-0.01624	73	-0.0096409	73	-0.00288				17.091	-2.56433			17.091	-3.0181				169.921	-7.00455			169.921	-7.57353
75	0.0370493	75	0.0012976	75	-0.00164		74	-0.01584	74	-0.0094409	74	-0.00258				17.2869	-2.54612			17.2869	-2.99357				172.103	-6.89996			172.103	-7.46172
76	0.0371493	76	0.00158572	76	-0.00209		75	-0.01554	75	-0.0093409	75	-0.00218				17.4831	-2.52809			17.4831	-2.9693				174.287	-6.79754			174.287	-7.3522
77	0.0372493	77	0.00187384	77	-0.00245		76	-0.01504	76	-0.0093409	76	-0.00188				17.6796	-2.51022			17.6796	-2.94528				176.475	-6.69722			176.475	-7.24492
78	0.0370493	78	0.00186196	78	-0.0026		77	-0.01454	77	-0.0094409	77	-0.00158				17.8763	-2.49251			17.8763	-2.92152				178.666	-6.59896			178.666	-7.1398
79	0.0366493	79	0.00165008	79	-0.00265		78	-0.01404	78	-0.0095409	78	-0.00138				18.0734	-2.47497			18.0734	-2.89802				180.861	-6.5027			180.861	-7.03679
80	0.0361493	80	0.0013382	80	-0.00261		79	-0.01364	79	-0.0095409	79	-0.00108				18.2707	-2.45758			18.2707	-2.87476				183.059	-6.40838			183.059	-6.93584
81	0.0356493	81	0.00102632	81	-0.00349		80	-0.01324	80	-0.0094409	80	-0.000677939				18.4682	-2.44035			18.4682	-2.85175				185.26	-6.31596			185.26	-6.8369
82	0.0351493	82	0.000714443	82	-0.00457		81	-0.01294	81	-0.0091409	81	-0.000177939				18.6661	-2.42328			18.6661	-2.82898				187.465	-6.22538			187.465	-6.73991
83	0.0345493	83	0.000605977	83	-0.00565		82	-0.01274	82	-0.0089409	82	0.000222061				18.8642	-2.40636			18.8642	-2.80645				189.673	-6.1366			189.673	-6.64482
84	0.0337493	84	0.00111197	84	-0.00654		83	-0.01264	83	-0.0085409	83	0.000522061				19.0625	-2.3896			19.0625	-2.78415				191.884	-6.04958			191.884	-6.55159
85	0.0329493	85	0.00161796	85	-0.00702		84	-0.01264	84	-0.0082409	84	0.000622061				19.2612	-2.37299			19.2612	-2.76209				194.099	-5.96426			194.099	-6.46017
86	0.0318493	86	0.00182395	86	-0.0071		85	-0.01264	85	-0.0079409	85	0.000622061				19.4601	-2.35652			19.4601	-2.74025				196.317	-5.8806			196.317	-6.3705
87	0.0306493	87	0.00192993	87	-0.00678		86	-0.01254	86	-0.0077409	86	0.000522061				19.6593	-2.3402			19.6593	-2.71865				198.539	-5.79857			198.539	-6.28256
88	0.0292493	88	0.00183592	88	-0.00616		87	-0.01244	87	-0.0074409	87	0.000422061				19.8588	-2.32403			19.8588	-2.69726				200.764	-5.71812			200.764	-6.19629
89	0.0277493	89	0.00164191	89	-0.00544		88	-0.01234	88	-0.0072409	88	0.000422061				20.0586	-2.308			20.0586	-2.6761				202.993	-5.63921			202.993	-6.11166
90	0.0262493	90	0.0014479	90	-0.00462		89	-0.01214	89	-0.0068409	89	0.000422061				20.2586	-2.29212			20.2586	-2.65515				205.225	-5.5618			205.225	-6.02862
91	0.0246493	91	0.00115389	91	-0.00371		90	-0.01194	90	-0.0065409	90	0.000422061				20.4589	-2.27637			20.4589	-2.63442				207.46	-5.48586			207.46	-5.94714
92	0.0231493	92	0.000959882	92	-0.00299		91	-0.01184	91	-0.0061409	91	0.000522061				20.6595	-2.26077			20.6595	-2.6139				209.699	-5.41135			209.699	-5.86718
93	0.0217493	93	0.000865871	93	-0.00227		92	-0.01164	92	-0.0058409	92	0.000622061				20.8603	-2.2453			20.8603	-2.59359				211.941	-5.33823			211.941	-5.7887
94	0.0203493	94	0.000771861	94	-0.00155		93	-0.01154	93	-0.0055409	93	0.000622061				21.0615	-2.22997			21.0615	-2.57349				214.187	-5.26648			214.187	-5.71166
95	0.0191493	95	0.00087785	95	-0.000831701		94	-0.01134	94	-0.0053409	94	0.000422061				21.2629	-2.21478			21.2629	-2.55359				216.436	-5.19606			216.436	-5.63604
96	0.0181493	96	0.000923331	96	-1.31656e-05		95	-0.01124	95	-0.0051409	95	0.000222061				21.4646	-2.19971			21.4646	-2.53389				218.688	-5.12693			218.688	-5.56179
97	0.0172493	97	0.000704869	97	0.00070537		96	-0.01104	96	-0.0049409	96	-7.79393e-05				21.6665	-2.18478			21.6665	-2.5144				220.944	-5.05907			220.944	-5.48889
98	0.0164493	98	0.000586407	98	0.00142		97	-0.01084	97	-0.0048409	97	-0.000177939				21.8688	-2.16998			21.8688	-2.49509				223.204	-4.99244			223.204	-5.4173
99	0.0155493	99	0.000367945	99	0.00194		98	-0.01074	98	-0.0048409	98	-7.79393e-05				22.0713	-2.15531			22.0713	-2.47599				225.467	-4.92703			225.467	-5.347
100	0.0146493	100	0.000149482	100	0.00216		99	-0.01054	99	-0.0049409	99	0.000222061				22.2741	-2.14077			22.2741	-2.45707				227.733	-4.86279			227.733	-5.27795
101	0.0138493	101	3.10201e-05	101	0.00208		100	-0.01034	100	-0.00504091	100	0.000622061				22.4772	-2.12635			22.4772	-2.43834				230.003	-4.7997			230.003	-5.21013
102	0.0130493	102	-8.74422e-05	102	0.0016		101	-0.01014	101	-0.00514091	101	0.00112				22.6806	-2.11206			22.6806	-2.4198				232.277	-4.73774			232.277	-5.1435
103	0.0124493	103	-5.90439e-06	103	0.000850031		102	-0.01004	102	-0.00534091	102	0.00152				22.8842	-2.09789			22.8842	-2.40144				234.554	-4.67688			234.554	-5.07804
104	0.0119493	104	0.000175633	104	0.00198		103	-0.00984	103	-0.00544091	103	0.00192				23.0881	-2.08384			23.0881	-2.38327				236.834	-4.61709			236.834	-5.01373
105	0.0115493	105	0.000457171	105	0.00302		104	-0.00974	104	-0.00564091	104	0.00212				23.2923	-2.06992			23.2923	-2.36527				239.118	-4.55835			239.118	-4.95053
106	0.0110493	106	0.000638709	106	0.00385		105	-0.00964	105	-0.00584091	105	0.00212				23.4968	-2.05611			23.4968	-2.34745				241.405	-4.50063			241.405	-4.88843
107	0.0106493	107	0.000920247	107	0.00458		106	-0.00964	106	-0.00604091	106	0.00192				23.7016	-2.04242			23.7016	-2.32981				243.696	-4.44392			243.696	-4.82739
108	0.0102493	108	0.00120178	108	0.00512		107	-0.00984	107	-0.00624091	107	0.00162				23.9066	-2.02885			23.9066	-2.31234				245.991	-4.38818			245.991	-4.7674
109	0.00994931	109	0.00158332	109	0.00545		108	-0.01004	108	-0.00654091	108	0.00132				24.112	-2.01539			24.112	-2.29504				248.289	-4.33341			248.289	-4.70842
110	0.00944931	110	0.00176486	110	0.00578		109	-0.01024	109	-0.00664091	109	0.00112				24.3176	-2.00205			24.3176	-2.27791				250.59	-4.27957			250.59	-4.65045
111	0.00874931	111	0.0017464	111	0.00602		110	-0.01044	110	-0.00674091	110	0.00112				24.5235	-1.98882			24.5235	-2.26095				252.895	-4.22665			252.895	-4.59345
112	0.00804931	112	0.00172794	112	0.00615		111	-0.01064	111	-0.00684091	111	0.00102				24.7297	-1.97571			24.7297	-2.24415				255.204	-4.17462			255.204	-4.53741
113	0.00734931	113	0.00170947	113	0.00628		112	-0.01074	112	-0.00704091	112	0.000922061				24.9361	-1.9627			24.9361	-2.22751				257.516	-4.12348			257.516	-4.48231
114	0.00664931	114	0.00169101	114	0.00642		113	-0.01084	113	-0.00704091	113	0.000522061				25.1429	-1.94981			25.1429	-2.21103				259.832	-4.07318			259.832	-4.42812
115	0.00594931	115	0.00167255	115	0.00645		114	-0.01084	114	-0.00704091	114	0.000122061				25.3499	-1.93702			25.3499	-2.19472				262.151	-4.02373			262.151	-4.37482
116	0.00514931	116	0.00155409	116	0.00649		115	-0.01084	115	-0.00694091	115	-0.000477939				25.5573	-1.92434			25.5573	-2.17856				264.474	-3.9751			264.474	-4.3224
117	0.00444931	117	0.00153562	117	0.00632		116	-0.01094	116	-0.00674091	116	-0.00108				25.7649	-1.91177			25.7649	-2.16255				266.8	-3.92727			266.8	-4.27084
118	0.00364931	118	0.00141716	118	0.00615		117	-0.01104	117	-0.00664091	117	-0.00168				25.9728	-1.8993			25.9728	-2.1467				269.13	-3.88022			269.13	-4.22012
119	0.00274931	119	0.0011987	119	0.00589		118	-0.01114	118	-0.00644091	118	-0.00228				26.181	-1.88694			26.181	-2.131				271.464	-3.83395			271.464	-4.17022
120	0.00184931	120	0.000980238	120	0.00552		119	-0.01114	119	-0.00634091	119	-0.00288				26.3894	-1.87468			26.3894	-2.11545				273.801	-3.78843			273.801	-4.12112
121	0.000949312	121	0.000761775	121	0.00525		120	-0.01114	120	-0.00624091	120	-0.00318				26.5982	-1.86252			26.5982	-2.10004				276.142	-3.74365			276.142	-4.07281
122	4.93121e-05	122	0.000543313	122	0.00489		121	-0.01114	121	-0.00614091	121	-0.00338				26.8072	-1.85046			26.8072	-2.08479				278.486	-3.69959			278.486	-4.02528
123	-0.000850688	123	0.000324851	123	0.00452		122	-0.01104	122	-0.00594091	122	-0.00338				27.0166	-1.8385			27.0166	-2.06967				280.834	-3.65623			280.834	-3.9785
124	-0.00175069	124	0.000106389	124	0.00415		123	-0.01074	123	-0.00584091	123	-0.00328				27.2262	-1.82664			27.2262	-2.0547				283.185	-3.61357			283.185	-3.93246
125	-0.00275069	125	-0.000212074	125	0.00379		124	-0.01044	124	-0.00564091	124	-0.00318				27.4361	-1.81488			27.4361	-2.03987				285.54	-3.57158			285.54	-3.88714
126	-0.00375069	126	-0.000530536	126	0.00332		125	-0.00994	125	-0.00554091	125	-0.00318				27.6463	-1.80321			27.6463	-2.02518				287.899	-3.53027			287.899	-3.84254
127	-0.00475069	127	-0.000848998	127	0.00285		126	-0.00944	126	-0.00554091	126	-0.00308				27.8568	-1.79164			27.8568	-2.01062				290.262	-3.4896			290.262	-3.79863
128	-0.00585069	128	-0.00126746	128	0.00239		127	-0.00894	127	-0.00564091	127	-0.00298				28.0676	-1.78017			28.0676	-1.9962				292.628	-3.44957			292.628	-3.75541
129	-0.00675069	129	-0.00148592	129	0.00192		128	-0.00864	128	-0.00584091	128	-0.00278				28.2786	-1.76879			28.2786	-1.98192				294.997	-3.41016			294.997	-3.71285
130	-0.00755069	130	-0.00160438	130	0.00155		129	-0.00844	129	-0.00614091	129	-0.00268				28.49	-1.7575			28.49	-1.96777				297.37	-3.37136			297.37	-3.67095
131	-0.00815069	131	-0.00152285	131	0.00129		130	-0.00824	130	-0.00664091	130	-0.00258				28.7017	-1.74631			28.7017	-1.95375				299.747	-3.33317			299.747	-3.62969
132	-0.00875069	132	-0.00144131	132	0.00122		131	-0.00814	131	-0.00714091	131	-0.00258				28.9136	-1.7352			28.9136	-1.93985				302.128	-3.29556			302.128	-3.58906
133	-0.00935069	133	-0.00135977	133	0.00125		132	-0.00814	132	-0.00774091	132	-0.00248				29.1258	-1.72419			29.1258	-1.92609				304.512	-3.25853			304.512	-3.54904
134	-0.00985069	134	-0.00117823	134	0.00129		133	-0.00814	133	-0.00824091	133	-0.00228				29.3384	-1.71326			29.3384	-1.91245				306.9	-3.22207			306.9	-3.50964
135	-0.0103507	135	-0.0013672	135	0.00142		134	-0.00804	134	-0.00864091	134	-0.00208				29.5512	-1.70242			29.5512	-1.89894				309.292	-3.18615			309.292	-3.47082
136	-0.0109507	136	-0.00199157	136	0.00165		135	-0.00794	135	-0.00914091	135	-0.00188				29.7643	-1.69167			29.7643	-1.88555				311.687	-3.15078			311.687	-3.43259
137	-0.0114507	137	-0.00251594	137	0.00209		136	-0.00794	136	-0.00954091	136	-0.00178				29.9777	-1.68101			29.9777	-1.87229				314.086	-3.11595			314.086	-3.39493
138	-0.0118507	138	-0.00294031	138	0.00226		137	-0.00794	137	-0.0100409	137	-0.00178				30.1914	-1.67043			30.1914	-1.85914				316.488	-3.08163			316.488	-3.35783
139	-0.0123507	139	-0.00346468	139	0.00164		138	-0.00794	138	-0.0104409	138	-0.00198				30.4054	-1.65994			30.4054	-1.84612				318.895	-3.04783			318.895	-3.32127
140	-0.0128507	140	-0.00398905	140	0.00112		139	-0.00804	139	-0.0108409	139	-0.00228				30.6197	-1.64953			30.6197	-1.83321				321.305	-3.01453			321.305	-3.28526
141	-0.0131507	141	-0.00431342	141	0.000606395		140	-0.00824	140	-0.0112409	140	-0.00258				30.8343	-1.6392			30.8343	-1.82042				323.718	-2.98172			323.718	-3.24977
142	-0.0134507	142	-0.00463779	142	0.000189715		141	-0.00854	141	-0.0114409	141	-0.00278				31.0492	-1.62896			31.0492	-1.80774				326.136	-2.9494			326.136	-3.2148
143	-0.0135507	143	-0.00476216	143	-0.000226965		142	-0.00884	142	-0.0116409	142	-0.00298				31.2644	-1.61879			31.2644	-1.79518				328.557	-2.91755			328.557	-3.18035
144	-0.0136507	144	-0.00488653	144	-0.000543644		143	-0.00904	143	-0.0118409	143	-0.00318				31.4799	-1.60871			31.4799	-1.78273				330.982	-2.88616			330.982	-3.14639
145	-0.0137507	145	-0.0050109	145	-0.000760324		144	-0.00914	144	-0.0118409	144	-0.00328				31.6957	-1.59871			31.6957	-1.7704				333.41	-2.85524			333.41	-3.11292
146	-0.0140507	146	-0.00533527	146	-0.000777004		145	-0.00924	145	-0.0119409	145	-0.00328				31.9117	-1.58879			31.9117	-1.75817				335.842	-2.82476			335.842	-3.07993
147	-0.0144507	147	-0.00575964	147	-0.000593684		146	-0.00934	146	-0.0120409	146	-0.00318				32.1281	-1.57894			32.1281	-1.74605				338.278	-2.79471			338.278	-3.04741
148	-0.0147507	148	-0.00608401	148	-0.000310364		147	-0.00934	147	-0.0121409	147	-0.00308				32.3448	-1.56917			32.3448	-1.73404				340.718	-2.7651			340.718	-3.01536
149	-0.0150507	149	-0.00640838	149	-2.70437e-05		148	-0.00934	148	-0.0122409	148	-0.00288				32.5617	-1.55948			32.5617	-1.72214				343.162	-2.73592			343.162	-2.98376
150	-0.0151507	150	-0.00653275	150	0.000156276		149	-0.00924	149	-0.0124409	149	-0.00268				32.779	-1.54987			32.779	-1.71034				345.609	-2.70715			345.609	-2.9526
151	-0.0150507	151	-0.00645712	151	0.000239597		150	-0.00894	150	-0.0127409	150	-0.00258				32.9966	-1.54033			32.9966	-1.69865				348.06	-2.67879			348.06	-2.92189
152	-0.0150507	152	-0.00648149	152	0.000322917		151	-0.00864	151	-0.0130409	151	-0.00248				33.2145	-1.53086			33.2145	-1.68706				350.515	-2.65082			350.515	-2.89161
153	-0.0151507	153	-0.00660586	153	0.000306237		152	-0.00824	152	-0.0133409	152	-0.00238				33.4326	-1.52147			33.4326	-1.67557				352.973	-2.62326			352.973	-2.86175
154	-0.0151507	154	-0.00663023	154	0.000289557		153	-0.00794	153	-0.0135409	153	-0.00228				33.6511	-1.51215			33.6511	-1.66418				355.436	-2.59607			355.436	-2.8323
155	-0.0150507	155	-0.0065546	155	0.000372877		154	-0.00764	154	-0.0134409	154	-0.00198				33.8699	-1.50291			33.8699	-1.65289				357.902	-2.56927			357.902	-2.80326
156	-0.0147507	156	-0.00627897	156	0.000456197		155	-0.00744	155	-0.0133409	155	-0.00158				34.0889	-1.49373			34.0889	-1.6417				360.372	-2.54284			360.372	-2.77462
157	-0.0143507	157	-0.00590334	157	0.000539517		156	-0.00714	156	-0.0132409	156	-0.00108				34.3083	-1.48463			34.3083	-1.63061				362.845	-2.51678			362.845	-2.74638
158	-0.0139507	158	-0.00552771	158	0.000622838		157	-0.00684	157	-0.0131409	157	-0.00057794				34.528	-1.4756			34.528	-1.61962				365.323	-2.49107			365.323	-2.71852
159	-0.0135507	159	-0.00515208	159	0.000706158		158	-0.00644	158	-0.0132409	158	2.20603e-05				34.748	-1.46663			34.748	-1.60872				367.804	-2.46572			367.804	-2.69105
160	-0.0132507	160	-0.00487645	160	0.000589478		159	-0.00614	159	-0.0133409	159	0.00052206				34.9683	-1.45774			34.9683	-1.59791				370.289	-2.44072			370.289	-2.66394
161	-0.0128507	161	-0.00450082	161	0.000372798		160	-0.00594	160	-0.0133409	160	0.00112				35.1888	-1.44891			35.1888	-1.5872				372.778	-2.41605			372.778	-2.6372
162	-0.0122507	162	-0.00392519	162	5.61182e-05		161	-0.00574	161	-0.0131409	161	0.00152				35.4097	-1.44015			35.4097	-1.57658				375.271	-2.39172			375.271	-2.61083
163	-0.0116507	163	-0.00334956	163	-0.000260562		162	-0.00574	162	-0.0130409	162	0.00182				35.6309	-1.43146			35.6309	-1.56605				377.767	-2.36772			377.767	-2.5848
164	-0.0110507	164	-0.00277393	164	-0.000377242		163	-0.00574	163	-0.0128409	163	0.00202				35.8524	-1.42284			35.8524	-1.55561				380.268	-2.34405			380.268	-2.55913
165	-0.0106507	165	-0.0023983	165	-0.000393921		164	-0.00594	164	-0.0126409	164	0.00202				36.0742	-1.41428			36.0742	-1.54527				382.772	-2.32069			382.772	-2.53379
166	-0.0102507	166	-0.00202267	166	-0.000310601		165	-0.00624	165	-0.0124409	165	0.00192				36.2964	-1.40578			36.2964	-1.53501				385.28	-2.29764			385.28	-2.50879
167	-0.00985069	167	-0.00164704	167	-0.000327281		166	-0.00644	166	-0.0123409	166	0.00172				36.5188	-1.39735			36.5188	-1.52483				387.792	-2.2749			387.792	-2.48413
168	-0.00935069	168	-0.00117141	168	-0.000443961		167	-0.00674	167	-0.0120409	167	0.00142				36.7415	-1.38899			36.7415	-1.51475				390.308	-2.25246			390.308	-2.45978
169	-0.00875069	169	-0.000595783	169	-0.000660641		168	-0.00704	168	-0.0119409	168	0.00122				36.9645	-1.38068			36.9645	-1.50475				392.828	-2.23032			392.828	-2.43576
170	-0.00845069	170	-0.000320153	170	-0.000877321		169	-0.00724	169	-0.0119409	169	0.00092206				37.1879	-1.37244			37.1879	-1.49483				395.351	-2.20847			395.351	-2.41205
171	-0.00845069	171	-6.52605e-06	171	-0.00119		170	-0.00754	170	-0.0120409	170	0.00062206				37.4115	-1.36426			37.4115	-1.485				397.879	-2.18691			397.879	-2.38865
172	-0.00875069	172	0.000924167	172	-0.00151		171	-0.00784	171	-0.0123409	171	0.00022206				37.6355	-1.35615			37.6355	-1.47525				400.41	-2.16562			400.41	-2.36556
173	-0.00945069	173	0.00145486	173	-0.000838439		172	-0.00814	172	-0.0126409	172	-0.00027794				37.8597	-1.34809			37.8597	-1.46558				402.945	-2.14462			402.945	-2.34276
174	-0.0103507	174	0.00178555	174	0.00041528		173	-0.00854	173	-0.0128409	173	-0.00087794				38.0843	-1.3401			38.0843	-1.456				405.484	-2.12389			405.484	-2.32025
175	-0.0114507	175	0.00191625	175	0.00147		174	-0.00884	174	-0.0130409	174	-0.00138				38.3092	-1.33216			38.3092	-1.44649				408.027	-2.10342			408.027	-2.29804
176	-0.0126507	176	0.00194694	176	0.00252		175	-0.00904	175	-0.0131409	175	-0.00188				38.5344	-1.32429			38.5344	-1.43707				410.574	-2.08322			410.574	-2.27611
177	-0.0140507	177	0.00177763	177	0.00348		176	-0.00904	176	-0.0132409	176	-0.00238				38.7599	-1.31647			38.7599	-1.42772				413.125	-2.06328			413.125	-2.25445
178	-0.0157507	178	0.00130833	178	0.00443		177	-0.00884	177	-0.0133409	177	-0.00298				38.9857	-1.30871			38.9857	-1.41845				415.68	-2.04359			415.679	-2.23308
179	-0.0175507	179	0.000739021	179	0.00518		178	-0.00864	178	-0.0134409	178	-0.00348				39.2119	-1.30101			39.2119	-1.40926				418.238	-2.02416			418.238	-2.21197
180	-0.0194507	180	6.97146e-05	180	0.00447		179	-0.00844	179	-0.0137409	179	-0.00398				39.4383	-1.29336			39.4383	-1.40014				420.801	-2.00497			420.801	-2.19113
181	-0.0214507	181	-0.000699592	181	0.00329		180	-0.00844	180	-0.0139409	180	-0.00438				39.665	-1.28577			39.665	-1.3911				423.367	-1.98602			423.367	-2.17055
182	-0.0235507	182	-0.0015689	182	0.00212		181	-0.00834	181	-0.0141409	181	-0.00458													425.938	-1.96731			425.938	-2.15023
183	-0.0256507	183	-0.00243821	183	0.000848653		182	-0.00824	182	-0.0144409	182	-0.00468													428.512	-1.94884			428.512	-2.13016
184	-0.0277507	184	-0.00330751	184	-0.000523599		183	-0.00814	183	-0.0146409	183	-0.00458													431.09	-1.9306			431.09	-2.11034
185	-0.0298507	185	-0.00417682	185	-0.0018		184	-0.00804	184	-0.0147409	184	-0.00448													433.673	-1.91258			433.673	-2.09077
186	-0.0317507	186	-0.00484613	186	-0.00297		185	-0.00794	185	-0.0147409	185	-0.00438
187	-0.0333507	187	-0.00521543	187	-0.00394		186	-0.00774	186	-0.0147409	186	-0.00448
188	-0.0346507	188	-0.00528474	188	-0.00461		187	-0.00754	187	-0.0146409	187	-0.00458
189	-0.0356507	189	-0.00505404	189	-0.00518		188	-0.00734	188	-0.0145409	188	-0.00468
190	-0.0363507	190	-0.00452335	190	-0.00556		189	-0.00704	189	-0.0145409	189	-0.00488
191	-0.0370507	191	-0.00399266	191	-0.00593		190	-0.00674	190	-0.0144409	190	-0.00508
192	-0.0374507	192	-0.00316196	192	-0.0063		191	-0.00644	191	-0.0144409	191	-0.00518
193	-0.0377507	193	-0.00223127	193	-0.00667		192	-0.00634	192	-0.0142409	192	-0.00518
194	-0.0380507	194	-0.00130058	194	-0.00705		193	-0.00624	193	-0.0140409	193	-0.00508
195	-0.0381507	195	-0.000169884	195	-0.00712		194	-0.00604	194	-0.0137409	194	-0.00488
196	-0.0380507	196	-0.000272318	196	-0.00699		195	-0.00584	195	-0.0134409	195	-0.00468
197	-0.0378507	197	-0.000595926	197	-0.00646		196	-0.00574	196	-0.0132409	196	-0.00458
198	-0.0373507	198	-0.000619533	198	-0.00584		197	-0.00574	197	-0.0130409	197	-0.00458
199	-0.0368507	199	-0.000643141	199	-0.00501		198	-0.00564	198	-0.0128409	198	-0.00478
200	-0.0364507	200	-0.000766749	200	-0.00418		199	-0.00554	199	-0.0128409	199	-0.00488
201	-0.0360507	201	-0.000890357	201	-0.00345		200	-0.00534	200	-0.0127409	200	-0.00488
202	-0.0357507	202	-0.00111396	202	-0.00272		201	-0.00504	201	-0.0126409	201	-0.00478
203	-0.0354507	203	-0.00133757	203	-0.0022		202	-0.00494	202	-0.0124409	202	-0.00468
204	-0.0351507	204	-0.00156118	204	-0.00167		203	-0.00494	203	-0.0120409	203	-0.00458
205	-0.0348507	205	-0.00178479	205	-0.00114		204	-0.00504	204	-0.0116409	204	-0.00438
206	-0.0345507	206	-0.00200839	206	-0.000713136		205	-0.00514	205	-0.0113409	205	-0.00428
207	-0.0342507	207	-0.002232	207	-0.000385387		206	-0.00524	206	-0.0112409	206	-0.00418
208	-0.0339507	208	-0.00245561	208	-0.000257639		207	-0.00534	207	-0.0111409	207	-0.00398
209	-0.0334507	209	-0.00247922	209	0.000343805		208	-0.00544	208	-0.0111409	208	-0.00368
210	-0.0329507	210	-0.00250283	210	0.00101		209	-0.00544	209	-0.0111409	209	-0.00348
211	-0.0322507	211	-0.00232643	211	0.00138		210	-0.00554	210	-0.0110409	210	-0.00328
212	-0.0316507	212	-0.00225004	212	0.00164		211	-0.00564	211	-0.0109409	211	-0.00298
213	-0.0309507	213	-0.00207365	213	0.00181		212	-0.00574	212	-0.0108409	212	-0.00268
214	-0.0301507	214	-0.00179726	214	0.00208		213	-0.00584	213	-0.0105409	213	-0.00248
215	-0.0291507	215	-0.00132086	215	0.00224		214	-0.00604	214	-0.0104409	214	-0.00218
216	-0.0281507	216	-0.000844472	216	0.00231		215	-0.00634	215	-0.0103409	215	-0.00198
217	-0.0271507	217	-0.00036808	217	0.00228		216	-0.00654	216	-0.0103409	216	-0.00168
218	-0.0261507	218	0.000108313	218	0.00214		217	-0.00664	217	-0.0104409	217	-0.00158
219	-0.0251507	219	0.000584705	219	0.00171		218	-0.00674	218	-0.0105409	218	-0.00158
220	-0.0240507	220	0.0011611	220	0.00128		219	-0.00684	219	-0.0105409	219	-0.00148
221	-0.0229507	221	0.00173749	221	0.000744709		220	-0.00704	220	-0.0104409	220	-0.00148
222	-0.0217507	222	0.00241388	222	0.000311451		221	-0.00724	221	-0.0101409	221	-0.00158
223	-0.0205507	223	0.00309027	223	-2.18067e-05		222	-0.00734	222	-0.00994091	222	-0.00178
224	-0.0194507	224	0.00366667	224	-0.000255065		223	-0.00744	223	-0.00964091	223	-0.00208
225	-0.0182507	225	0.00434306	225	-0.000588323		224	-0.00744	224	-0.00944091	224	-0.00228
226	-0.0170507	226	0.00501945	226	-0.000921581		225	-0.00744	225	-0.00924091	225	-0.00238
227	-0.0159507	227	0.00559584	227	-0.00135		226	-0.00744	226	-0.00894091	226	-0.00238
228	-0.0149507	228	0.00607224	228	-0.00179		227	-0.00744	227	-0.00874091	227	-0.00238
229	-0.0142507	229	0.00624863	229	-0.00222		228	-0.00744	228	-0.00854091	228	-0.00248
230	-0.0136507	230	0.00632502	230	-0.00265		229	-0.00754	229	-0.00834091	229	-0.00278
231	-0.0133507	231	0.00610141	231	-0.00299		230	-0.00754	230	-0.00824091	230	-0.00308
232	-0.0129507	232	0.0059778	232	-0.00332		231	-0.00764	231	-0.00794091	231	-0.00348
233	-0.0127507	233	0.0056542	233	-0.00345		232	-0.00764	232	-0.00754091	232	-0.00388
234	-0.0124507	234	0.00543059	234	-0.00359		233	-0.00764	233	-0.00714091	233	-0.00408
235	-0.0122507	235	0.00510698	235	-0.00352		234	-0.00764	234	-0.00684091	234	-0.00428
236	-0.0120507	236	0.00478337	236	-0.00335		235	-0.00764	235	-0.00674091	235	-0.00448
237	-0.0118507	237	0.00445977	237	-0.00309		236	-0.00764	236	-0.00684091	236	-0.00458
238	-0.0117507	238	0.00403616	238	-0.00262		237	-0.00764	237	-0.00684091	237	-0.00468
239	-0.0116507	239	0.00361255	239	-0.00205		238	-0.00764	238	-0.00674091	238	-0.00468
240	-0.0117507	240	0.00298894	240	-0.00149		239	-0.00754	239	-0.00654091	239	-0.00478
241	-0.0118507	241	0.00236534	241	-0.00102		240	-0.00744	240	-0.00624091	240	-0.00498
242	-0.0120507	242	0.00164173	242	-0.000653708		241	-0.00744	241	-0.00594091	241	-0.00518
243	-0.0121507	243	0.00101812	243	-0.000436511		242	-0.00734	242	-0.00564091	242	-0.00538
244	-0.0120507	244	0.000594513	244	-0.00102		243	-0.00724	243	-0.00534091	243	-0.00548
245	-0.0118507	245	0.000270905	245	-0.0014		244	-0.00704	244	-0.00504091	244	-0.00558
246	-0.0113507	246	0.000247297	246	-0.00149		245	-0.00674	245	-0.00474091	245	-0.00548
247	-0.0107507	247	0.00032369	247	-0.00147		246	-0.00624	246	-0.00454091	246	-0.00538
248	-0.00995069	248	0.000600082	248	-0.00145		247	-0.00574	247	-0.00444091	247	-0.00528
249	-0.00925069	249	0.000776474	249	-0.00134		248	-0.00514	248	-0.00444091	248	-0.00528
250	-0.00845069	250	0.00105287	250	-0.00112		249	-0.00454	249	-0.00444091	249	-0.00528
251	-0.00765069	251	0.00132926	251	-0.000803615		250	-0.00404	250	-0.00444091	250	-0.00528
252	-0.00675069	252	0.00170565	252	-0.000587003		251	-0.00364	251	-0.00434091	251	-0.00528
253	-0.00565069	253	0.00228204	253	-0.000270391		252	-0.00324	252	-0.00424091	252	-0.00518
254	-0.00455069	254	0.00285844	254	4.62213e-05		253	-0.00294	253	-0.00414091	253	-0.00498
255	-0.00345069	255	0.00343483	255	0.000462833		254	-0.00264	254	-0.00414091	254	-0.00468
256	-0.00235069	256	0.00401122	256	0.00118		255	-0.00244	255	-0.00414091	255	-0.00438
257	-0.00135069	257	0.00448761	257	0.0019		256	-0.00204	256	-0.00414091	256	-0.00418
258	-0.000350692	258	0.004964	258	0.00261		257	-0.00174	257	-0.00424091	257	-0.00408
259	0.000649308	259	0.0054404	259	0.00323		258	-0.00134	258	-0.00434091	258	-0.00408
260	0.00154931	260	0.00581679	260	0.00355		259	-0.00104	259	-0.00444091	259	-0.00408
261	0.00224931	261	0.00599318	261	0.00386		260	-0.00104	260	-0.00444091	260	-0.00398
262	0.00274931	262	0.00596957	262	0.00398		261	-0.00114	261	-0.00444091	261	-0.00378
263	0.00314931	263	0.00584597	263	0.0042		262	-0.00134	262	-0.00414091	262	-0.00338
264	0.00344931	264	0.00562236	264	0.00431		263	-0.00174	263	-0.00394091	263	-0.00298
265	0.00364931	265	0.00529875	265	0.00433		264	-0.00204	264	-0.00354091	264	-0.00258
266	0.00374931	266	0.00487514	266	0.00425		265	-0.00234	265	-0.00304091	265	-0.00228
267	0.00374931	267	0.00435154	267	0.00406		266	-0.00254	266	-0.00264091	266	-0.00208
268	0.00364931	268	0.00372793	268	0.00368		267	-0.00264	267	-0.00224091	267	-0.00198
269	0.00354931	269	0.00310432	269	0.0032		268	-0.00264	268	-0.00204091	268	-0.00208
270	0.00334931	270	0.00238071	270	0.00261		269	-0.00264	269	-0.00174091	269	-0.00228
271	0.00294931	271	0.0014571	271	0.0026		270	-0.00264	270	-0.00154091	270	-0.00248
272	0.00254931	272	0.000533497	272	0.00302		271	-0.00264	271	-0.00134091	271	-0.00248
273	0.00204931	273	-0.000330822	273	0.00334		272	-0.00264	272	-0.00104091	272	-0.00228
274	0.00164931	274	0.000429959	274	0.00366		273	-0.00264	273	-0.00084091	273	-0.00188
275	0.00124931	275	0.00119074	275	0.00358		274	-0.00254	274	-0.00074091	274	-0.00158
276	0.000849308	276	0.00195152	276	0.0033		275	-0.00234	275	-0.00054091	275	-0.00148
277	0.000249308	277	0.0025123	277	0.00282		276	-0.00204	276	-0.00054091	276	-0.00148
278	-0.000450692	278	0.00297308	278	0.00225		277	-0.00174	277	-0.00054091	277	-0.00158
279	-0.00115069	279	0.00343386	279	0.00167		278	-0.00144	278	-0.00054091	278	-0.00158
280	-0.00195069	280	0.00379464	280	0.000987024		279	-0.00114	279	-0.00074091	279	-0.00148
281	-0.00265069	281	0.00425542	281	0.000407912		280	-0.000940972	280	-0.00094091	280	-0.00128
282	-0.00355069	282	0.00451621	282	-0.000171199		281	-0.000840972	281	-0.00114091	281	-0.00097794
283	-0.00455069	283	0.00467699	283	-0.000850311		282	-0.000640972	282	-0.00134091	282	-0.00067794
284	-0.00555069	284	0.00483777	284	-0.00163		283	-0.000640972	283	-0.00154091	283	-0.00027794
285	-0.00665069	285	0.00489855	285	-0.00261		284	-0.000540972	284	-0.00174091	284	0.00022206
286	-0.00765069	286	0.00505933	286	-0.00359		285	-0.000440972	285	-0.00194091	285	0.00072206
287	-0.00865069	287	0.00522011	287	-0.00457		286	-0.000340972	286	-0.00214091	286	0.00102
288	-0.00965069	288	0.00538089	288	-0.00545		287	-0.000140972	287	-0.00224091	287	0.00102
289	-0.0107507	289	0.00544167	289	-0.00612		288	-4.09719e-05	288	-0.00234091	288	0.000922059
290	-0.0120507	290	0.00530245	290	-0.0065		289	5.90281e-05	289	-0.00234091	289	0.000922059
291	-0.0133507	291	0.00516323	291	-0.00678		290	0.000159028	290	-0.00244091	290	0.00112
292	-0.0147507	292	0.00492401	292	-0.00696		291	0.000359028	291	-0.00264091	291	0.00152
293	-0.0161507	293	0.00468479	293	-0.00704		292	0.000459028	292	-0.00274091	292	0.00182
294	-0.0174507	294	0.00454557	294	-0.00692		293	0.000559028	293	-0.00294091	293	0.00202
295	-0.0187507	295	0.00440636	295	-0.0068		294	0.000659028	294	-0.00314091	294	0.00212
296	-0.0200507	296	0.00426714	296	-0.00658		295	0.000759028	295	-0.00344091	295	0.00212
297	-0.0214507	297	0.00402792	297	-0.00616		296	0.000759028	296	-0.00364091	296	0.00212
298	-0.0227507	298	0.0038887	298	-0.00544		297	0.000759028	297	-0.00374091	297	0.00212
299	-0.0239507	299	0.00384948	299	-0.00452		298	0.000759028	298	-0.00384091	298	0.00212
300	-0.0252507	300	0.00371026	300	-0.0034		299	0.000759028	299	-0.00384091	299	0.00212
301	-0.0263507	301	0.00377104	301	-0.00236		300	0.000759028	300	-0.00394091	300	0.00202
302	-0.0270239	302	0.00363182	302	-0.00133		301	0.000759028	301	-0.00394091	301	0.00192
303	-0.0280105	303	0.0034926	303	-0.000396039		302	0.000659028	302	-0.00406985	302	0.00188
304	-0.0290971	304	0.00279844	304	0.000637018		303	0.000659028	303	-0.00408432	303	0.00181
305	-0.0301837	305	0.00196772	305	0.00167		304	0.000659028	304	-0.00399879	304	0.00164
306	-0.0311703	306	0.00123701	306	0.0028		305	0.000759028	305	-0.00371326	305	0.00137
307	-0.0318569	307	0.000806291	307	0.00414		306	0.000859028	306	-0.00352773	306	0.0011
308	-0.0324435	308	0.000475577	308	0.00547		307	0.00106	307	-0.0033422	307	0.000724595
309	-0.0330301	309	0.000144862	309	0.0068		308	0.00136	308	-0.00325667	308	0.000453529
310	-0.0337167	310	-0.000285853	310	0.00804		309	0.00166	309	-0.00307114	309	0.000282462
311	-0.0344033	311	-0.000716567	311	0.00927		310	0.00198	310	-0.00278561	310	0.000411396
312	-0.0350899	312	-0.00114728	312	0.0103		311	0.00349	311	-0.00140008	311	0.00124
313	-0.0355765	313	-0.001378	313	0.01143		312	0.00771	312	0.00258545	312	0.00347
314	-0.0358631	314	-0.00140871	314	0.01247		313	0.01652	313	0.010671	313	0.0078
315	-0.0356497	315	-0.000939426	315	0.0137		314	0.03103	314	0.0238565	314	0.01453
316	-0.0352362	316	-0.00027014	316	0.01513		315	0.05074	315	0.041742	315	0.02356
317	-0.0346228	317	0.000726754	317	0.01677		316	0.07475	316	0.0632276	316	0.03408
318	-0.0338094	318	0.0020131	318	0.0185		317	0.10136	317	0.0870131	317	0.04541
319	-0.032896	319	0.00339944	319	0.02043		318	0.12928	318	0.111899	318	0.05704
320	-0.0318826	320	0.00488578	320	0.02237		319	0.15779	319	0.137084	319	0.06877
321	-0.0308692	321	0.00637213	321	0.0243		320	0.1864	320	0.16227	320	0.0804
322	-0.0296558	322	0.00805847	322	0.02593		321	0.21481	321	0.187155	321	0.09193
323	-0.0284424	323	0.00974481	323	0.02737		322	0.24272	322	0.211541	322	0.10306
324	-0.027129	324	0.0115312	324	0.0287		323	0.26983	323	0.235026	323	0.11369
325	-0.0258156	325	0.0133175	325	0.02973		324	0.29555	324	0.257612	324	0.12342
326	-0.0245022	326	0.0151038	326	0.03066		325	0.31976	325	0.278597	325	0.13225
327	-0.0233888	327	0.0166902	327	0.0312		326	0.34127	326	0.297283	326	0.13967
328	-0.0224754	328	0.0180765	328	0.03143		327	0.35848	327	0.311968	327	0.1449
329	-0.022062	329	0.0189629	329	0.03146		328	0.36959	328	0.320954	328	0.14723
330	-0.0220486	330	0.0194492	330	0.0312		329	0.3736	329	0.323739	329	0.14636
331	-0.0222352	331	0.0197356	331	0.03063		330	0.37082	330	0.320625	330	0.14269
332	-0.0226218	332	0.0198219	332	0.02966		331	0.36243	331	0.312611	331	0.13682
333	-0.0231084	333	0.0197476	333	0.0283		332	0.35014	332	0.301196	332	0.12965
334	-0.023595	334	0.019173	334	0.02653		333	0.33515	333	0.287582	333	0.12168
335	-0.0242816	335	0.0183984	335	0.02456		334	0.31846	334	0.272367	334	0.11331
336	-0.0249682	336	0.0176238	336	0.02239		335	0.30047	335	0.256153	335	0.10453
337	-0.0258548	337	0.0166492	337	0.02023		336	0.28159	336	0.239438	336	0.09546
338	-0.0269414	338	0.0154746	338	0.01806		337	0.2621	337	0.222624	337	0.08639
339	-0.028128	339	0.0142	339	0.01599		338	0.24251	338	0.205909	338	0.07752
340	-0.0294146	340	0.0128254	340	0.01383		339	0.22352	339	0.189695	339	0.06915
341	-0.0307012	341	0.0114508	341	0.01186		340	0.20533	340	0.17418	340	0.06138
342	-0.0319878	342	0.0100763	342	0.01019		341	0.18824	341	0.159366	341	0.05421
343	-0.0331744	343	0.00880166	343	0.00863		342	0.17226	342	0.145451	342	0.04764
344	-0.034161	344	0.00772706	344	0.00726		343	0.15737	343	0.132537	343	0.04147
345	-0.0351476	345	0.00665247	345	0.00589		344	0.14348	344	0.120522	344	0.036
346	-0.0361342	346	0.00557787	346	0.00463		345	0.13069	345	0.109508	345	0.03112
347	-0.0371208	347	0.00450328	347	0.00336		346	0.1188	346	0.0993935	346	0.02665
348	-0.0380074	348	0.00352868	348	0.00239		347	0.10802	347	0.090179	347	0.02258
349	-0.038794	349	0.00265409	349	0.00152		348	0.09813	348	0.0819645	348	0.01901
350	-0.0395806	350	0.0017795	350	0.000757615		349	0.08924	349	0.0745501	349	0.01584
351	-0.0401672	351	0.0011049	351	9.06713e-05		350	0.08115	350	0.0678356	350	0.01297
352	-0.0407537	352	0.000430307	352	-0.000576272		351	0.07386	351	0.0618211	351	0.0106
353	-0.0411403	353	-4.42879e-05	353	-0.00124		352	0.06737	352	0.0564067	352	0.00843
354	-0.0414269	354	-0.000418882	354	-0.00171		353	0.06169	353	0.0515922	353	0.00656
355	-0.0416135	355	-0.000693477	355	-0.00198		354	0.0567	354	0.0472777	354	0.00478
356	-0.0417001	356	-0.000868071	356	-0.00184		355	0.05231	355	0.0435633	355	0.00321
357	-0.0416867	357	-0.000942666	357	-0.00161		356	0.04832	356	0.0402488	356	0.00164
358	-0.0415733	358	-0.00091726	358	-0.00128		357	0.04483	357	0.0373343	357	0.000271278
359	-0.0413599	359	-0.000791855	359	-0.000699949		358	0.04154	358	0.0346198	358	-0.000899789
360	-0.0409465	360	-0.00046645	360	-0.000221965		359	0.03856	359	0.0322054	359	-0.00207
361	-0.0405331	361	-0.000141044	361	0.000156019		360	0.03597	360	0.0299909	360	-0.00304
362	-0.0403197	362	-1.56386e-05	362	0.000434003		361	0.03368	361	0.0279764	361	-0.00391
363	-0.0401063	363	0.000109767	363	0.000811987		362	0.03159	362	0.026062	362	-0.00468
364	-0.0399929	364	0.000135172	364	0.00119		363	0.0298	363	0.0244475	363	-0.00526
365	-0.0396795	365	0.000360578	365	0.00177		364	0.02811	364	0.022933	364	-0.00573
366	-0.0394661	366	0.000485983	366	0.00225		365	0.02663	365	0.0215186	365	-0.006
367	-0.0391527	367	0.000711389	367	0.00272		366	0.02554	366	0.0204041	366	-0.00617
368	-0.0388393	368	0.000936794	368	0.0031		367	0.02455	367	0.0192896	367	-0.00624
369	-0.0384259	369	0.0012622	369	0.00338		368	0.02356	368	0.0181752	368	-0.00641
370	-0.0379125	370	0.00122704	370	0.00356		369	0.02247	369	0.0170607	369	-0.00658
371	-0.0372991	371	0.000871754	371	0.00354		370	0.02138	370	0.0159462	370	-0.00665
372	-0.0364857	372	0.000716468	372	0.00341		371	0.0202	371	0.0150317	371	-0.00662
373	-0.0356723	373	0.000561182	373	0.00329		372	0.01901	372	0.0143173	372	-0.00659
374	-0.0349589	374	0.000305896	374	0.00297		373	0.01792	373	0.0137028	373	-0.00667
375	-0.0342455	375	5.06098e-05	375	0.00275		374	0.01713	374	0.0130883	374	-0.00674
376	-0.0333321	376	-4.67616e-06	376	0.00253		375	0.01634	375	0.0124739	375	-0.00691
377	-0.0323187	377	4.00379e-05	377	0.0024		376	0.01565	376	0.0119594	376	-0.00688
378	-0.0312053	378	0.000184752	378	0.00218		377	0.01497	377	0.0114449	377	-0.00685
379	-0.0300919	379	0.000329466	379	0.00186		378	0.01438	378	0.0110305	378	-0.00672
380	-0.0289785	380	0.00047418	380	0.00164		379	0.01359	379	0.010616	379	-0.00669
381	-0.0278651	381	0.000618894	381	0.00152		380	0.0127	380	0.0102015	380	-0.00676
382	-0.0268517	382	0.000663608	382	0.00149		381	0.01171	381	0.00988705	381	-0.00683
383	-0.0257383	383	0.000808322	383	0.00147		382	0.01082	382	0.00947258	382	-0.00701
384	-0.0248249	384	0.000753036	384	0.00135		383	0.01014	383	0.00925811	383	-0.00718
385	-0.0239115	385	0.00069775	385	0.00133		384	0.00965	384	0.00914364	384	-0.00725
386	-0.0230981	386	0.000542464	386	0.00131		385	0.00926	385	0.00902917	385	-0.00742
387	-0.0221847	387	0.000487178	387	0.000874502		386	0.00907	386	0.0088147	386	-0.00759
388	-0.0213712	388	0.000331893	388	4.17085e-05		387	0.00888	387	0.00840023	387	-0.00766
389	-0.0205578	389	0.000176607	389	-0.000691085		388	0.00879	388	0.00798576	388	-0.00763
390	-0.0197444	390	2.13206e-05	390	-0.00132		389	0.00871	389	0.00767129	389	-0.0075
391	-0.018931	391	-0.000133965	391	-0.00186		390	0.00862	390	0.00735682	390	-0.00717
392	-0.0182176	392	-0.000389251	392	-0.00229		391	0.00843	391	0.00704235	391	-0.00684
393	-0.0174042	393	-0.000544537	393	-0.00242		392	0.00824	392	0.00672788	392	-0.00672
394	-0.0165908	394	-0.000699823	394	-0.00236		393	0.00805	393	0.00631341	393	-0.00669
395	-0.0156774	395	-0.000755109	395	-0.00229		394	0.00786	394	0.00579894	394	-0.00676
396	-0.014664	396	-0.000710395	396	-0.00222		395	0.00778	395	0.00528447	395	-0.00683
397	-0.0137506	397	-0.000765681	397	-0.00215		396	0.00759	396	0.00487	396	-0.0068
398	-0.0127372	398	-0.000720967	398	-0.00209		397	0.0074	397	0.00455553	397	-0.00657
399	-0.0117238	399	-0.000676253	399	-0.00192		398	0.00721	398	0.00434106	398	-0.00624
400	-0.0107104	400	-0.000631539	400	-0.00155		399	0.00702	399	0.00422659	399	-0.00591
401	-0.00969701	401	-0.000586825	401	-0.00128		400	0.00683	400	0.00411212	400	-0.00568
402	-0.00848361	402	-0.000342111	402	-0.000817396		401	0.00665	401	0.00389765	401	-0.00546
403	-0.00727021	403	-9.73966e-05	403	-0.00035019		402	0.00636	402	0.00368319	402	-0.00523
404	-0.0058568	404	0.000347317	404	0.000117017		403	0.00597	403	0.00336872	403	-0.0049
405	-0.0045434	405	0.000692032	405	0.000784224		404	0.00548	404	0.00315425	404	-0.00467
406	-0.00333	406	0.000936746	406	0.00155		405	0.00509	405	0.00293978	405	-0.00454
407	-0.0023166	407	0.00098146	407	0.00242		406	0.00461	406	0.00282531	406	-0.00441
408	-0.00140319	408	0.000926174	408	0.00319		407	0.00402	407	0.00281084	407	-0.00418
409	-0.000589791	409	0.000770888	409	0.00365		408	0.00363	408	0.00279637	408	-0.00385
410	0.000223612	410	0.000615602	410	0.00402		409	0.00334	409	0.00300174	409	-0.00362
411	0.000937015	411	0.000360316	411	0.00439		410	0.00325	410	0.00310711	410	-0.0035
412	0.00145042	412	-9.49701e-05	412	0.00485		411	0.00326	411	0.00321248	411	-0.00337
413	0.00206382	413	-0.000450256	413	0.00532		412	0.00328	412	0.00321786	412	-0.00334
414	0.00247722	414	-0.000964719	414	0.00589		413	0.00319	413	0.00292323	413	-0.00341
415	0.00279063	415	-0.000135975	415	0.00616		414	0.003	414	0.0025286	414	-0.00338
416	0.00290403	416	0.000492769	416	0.00632		415	0.00271	415	0.00223397	415	-0.00345
417	0.00261743	417	0.000721512	417	0.00639		416	0.00232	416	0.00183934	416	-0.00352
418	0.00233083	418	0.000950256	418	0.00636		417	0.00193	417	0.00174472	417	-0.00369
419	0.00184424	419	0.000979	419	0.00633		418	0.00155	418	0.00185009	418	-0.00396
420	0.00125764	420	0.000907743	420	0.00619		419	0.00106	419	0.00195546	419	-0.00433
421	0.000671042	421	0.000836487	421	0.00586		420	0.000768768	420	0.00196083	420	-0.00471
422	8.44451e-05	422	0.000765231	422	0.00513		421	0.000680462	421	0.0019662	421	-0.00498
423	-0.000502152	423	0.000693975	423	0.00419		422	0.000692156	422	0.00207158	422	-0.00525
424	-0.00118875	424	0.000522718	424	0.00306		423	0.00060385	423	0.00207695	423	-0.00542
425	-0.00187535	425	0.000351462	425	0.00193		424	0.000415544	424	0.00208232	424	-0.00559
426	-0.00256194	426	0.000180206	426	0.000695566		425	0.000227239	425	0.00218769	425	-0.00566
427	-0.00314854	427	0.000108949	427	-0.000737227		426	3.89327e-05	426	0.00219306	426	-0.00543
428	-0.00353514	428	0.000237693	428	-0.00217		427	-0.000149373	427	0.00229844	427	-0.0052
429	-0.00392174	429	0.000366437	429	-0.00126		428	-0.000337679	428	0.00250381	428	-0.00507
430	-0.00420833	430	0.00059518	430	0.00419		429	-0.000425985	429	0.00280918	429	-0.00485
431	-0.00439493	431	0.000923924	431	0.00954		430	-0.000414291	430	0.00311455	430	-0.00472
432	-0.00448153	432	0.00135267	432	0.01469		431	-0.000202597	431	0.00341992	431	-0.00449
433	-0.00476812	433	0.00158141	433	0.01414		432	9.09737e-06	432	0.0036253	432	-0.00406
434	-0.00505472	434	0.00181016	434	0.01244		433	0.000420791	433	0.00373067	433	-0.00363
435	-0.00544132	435	0.0019389	435	0.01084		434	0.000632486	434	0.00363604	434	-0.0032
436	-0.00562792	436	0.00226764	436	0.00924		435	0.00084418	435	0.00354141	435	-0.00267
437	-0.00591451	437	0.00249639	437	0.00793		436	0.000955874	436	0.00344678	436	-0.00214
438	-0.00610111	438	0.00282513	438	0.00663		437	0.000967568	437	0.00335216	437	-0.00171
439	-0.00638771	439	0.00305387	439	0.00533		438	0.00108	438	0.00335753	438	-0.00139
440	-0.0066743	440	0.00328262	440	0.00423		439	0.00129	439	0.0034629	439	-0.00106
441	-0.0069609	441	0.00351136	441	0.00303		440	0.0014	440	0.00356827	440	-0.000827229
442	-0.0074475	442	0.0035401	442	0.00193		441	0.00131	441	0.00367364	441	-0.000698295
443	-0.0080341	443	0.00346885	443	0.00102		442	0.00133	442	0.00377902	442	-0.000669362
444	-0.00872069	444	0.00329759	444	0.00022185		443	0.00134	443	0.00388439	443	-0.000743882
445	-0.00960729	445	0.00292634	445	-0.000379805		444	0.00135	444	0.00388976	444	-0.000718402
446	-0.0105939	446	0.00245508	446	-0.000581461		445	0.00136	445	0.00389513	445	-0.000592922
447	-0.0116805	447	0.00188382	447	-0.000483116		446	0.00137	446	0.0038005	446	-0.000367442
448	-0.0126671	448	0.00141257	448	-0.000284772		447	0.00148	447	0.00370588	447	-4.19616e-05
449	-0.0137537	449	0.00084131	449	1.35729e-05		448	0.0015	448	0.00351125	448	0.000283518
450	-0.0148403	450	0.000270054	450	0.000411917		449	0.00161	449	0.00341662	449	0.000508998
451	-0.0160269	451	-0.000401202	451	0.000718507		450	0.00172	450	0.00332199	450	0.000534478
452	-0.0171135	452	-0.000972459	452	0.000222641		451	0.00173	451	0.00322736	451	0.000659958
453	-0.0182001	453	-0.00154371	453	-7.32257e-05		452	0.00164	452	0.00303274	452	0.000785438
454	-0.0192867	454	-0.00211497	454	-0.000269092		453	0.00145	453	0.00283811	453	0.00101
455	-0.0204733	455	-0.00278623	455	-0.000264959		454	0.00127	454	0.00254348	454	0.00134
456	-0.0215599	456	-0.00335748	456	3.91748e-05		455	0.00108	455	0.00214885	455	0.00156
457	-0.0227465	457	-0.00402874	457	0.000443308		456	0.000689756	456	0.00175422	456	0.00169
458	-0.0238331	458	-0.0046	458	0.000947442		457	0.00040145	457	0.0013596	457	0.00181
459	-0.0249197	459	-0.00517125	459	0.00145		458	0.000213144	458	0.000864968	458	0.00204
460	-0.0259062	460	-0.00564251	460	0.00196		459	-2.864e-05	459	0.00027034	459	0.00226
461	-0.0267928	461	-0.00601377	461	0.00246		460	-0.000170424	460	-0.000424288	460	0.00249
462	-0.0275794	462	-0.00628502	462	0.00286		461	-0.000212209	461	-0.000918916	461	0.00261
463	-0.028166	463	-0.00635628	463	0.00327		462	-0.000353993	462	-0.00131354	462	0.00264
464	-0.0287526	464	-0.00642753	464	0.00357		463	-0.000595777	463	-0.00160817	463	0.00257
465	-0.0293392	465	-0.00649879	465	0.00388		464	-0.000737561	464	-0.0020028	464	0.00249
466	-0.0297258	466	-0.00637005	466	0.00408		465	-0.000879346	465	-0.00229743	465	0.00242
467	-0.0301124	467	-0.0062413	467	0.00428		466	-0.00082113	466	-0.00269206	466	0.00234
468	-0.030399	468	-0.00601256	468	0.00459		467	-0.000662914	467	-0.00318668	467	0.00227
469	-0.0305856	469	-0.00568382	469	0.00479		468	-0.000404698	468	-0.00358131	468	0.00219
470	-0.0308722	470	-0.00545507	470	0.0049		469	-4.64827e-05	469	-0.00387594	469	0.00202
471	-0.0311588	471	-0.00522633	471	0.0047		470	0.000211733	470	-0.00407057	470	0.00174
472	-0.0312454	472	-0.00479758	472	0.00431		471	0.000569949	471	-0.0041652	471	0.00147
473	-0.031232	473	-0.00426884	473	0.00371		472	0.000928164	472	-0.00425982	472	0.0011
474	-0.0309186	474	-0.0034401	474	0.00291		473	0.00119	473	-0.00415445	473	0.000720519
475	-0.0306052	475	-0.00261135	475	0.00325		474	0.00124	474	-0.00404908	474	0.000245999
476	-0.0302918	476	-0.00178261	476	0.00412		475	0.0013	475	-0.00374371	475	-0.000228521
477	-0.0299784	477	-0.000953867	477	0.00499		476	0.00136	476	-0.00353834	476	-0.000703041
478	-0.029665	478	-0.000518637	478	0.00565		477	0.00142	477	-0.00323296	477	-0.00128
479	-0.0293516	479	-0.000479223	479	0.00632		478	0.00138	478	-0.00302759	478	-0.00165
480	-0.0290382	480	-0.00043981	480	0.00679		479	0.00134	479	-0.00282222	479	-0.00193
481	-0.0288248	481	-0.000500397	481	0.00695		480	0.00119	480	-0.00251685	480	-0.0021
482	-0.0286114	482	-0.000560984	482	0.00692		481	0.000952106	481	-0.00241148	481	-0.00228
483	-0.028398	483	-0.00062157	483	0.00659		482	0.000710322	482	-0.0023061	482	-0.00235
484	-0.0280846	484	-0.000582157	484	0.00605		483	0.000468537	483	-0.00240073	483	-0.00242
485	-0.0276712	485	-0.000442744	485	0.00542		484	0.000426753	484	-0.00259536	484	-0.0023
486	-0.0270578	486	-0.000103331	486	0.00479		485	0.000384969	485	-0.00288999	485	-0.00207
487	-0.0263444	487	0.000336083	487	0.00415		486	0.000443185	486	-0.00328462	486	-0.00175
488	-0.025731	488	0.000675496	488	0.00362		487	0.0005014	487	-0.00367924	487	-0.00132
489	-0.0250176	489	0.00111491	489	0.00309		488	0.000659616	488	-0.00407387	488	-0.000997281
490	-0.0242042	490	0.00165432	490	0.00255		489	0.000917832	489	-0.0044685	489	-0.000771801
491	-0.0231908	491	0.00239374	491	0.00202		490	0.00118	490	-0.00486313	490	-0.000546321
492	-0.0222774	492	0.00303315	492	0.00138		491	0.00133	491	-0.00515776	491	-0.000320841
493	-0.021364	493	0.00367256	493	0.000751123		492	0.00149	492	-0.00545238	492	4.63862e-06
494	-0.0203506	494	0.00441198	494	0.000117652		493	0.00155	493	-0.00574701	493	0.000130119
495	-0.0193372	495	0.00515139	495	-0.000415819		494	0.00151	494	-0.00604164	494	0.000255599
496	-0.0181237	496	0.0060908	496	-0.000749291		495	0.00157	495	-0.00643627	495	0.000181079
497	-0.0170103	497	0.00693022	497	-0.000882762		496	0.00153	496	-0.0067309	496	6.55864e-06
498	-0.0156969	498	0.00796963	498	-0.000916233		497	0.00148	497	-0.00702552	497	-0.000167961
499	-0.0144835	499	0.00890904	499	-0.000649704		498	0.00144	498	-0.00712015	498	-0.000442481
500	-0.0132701	500	0.00984845	500	-0.00035341		499	0.0014	499	-0.00691478	499	-0.000817001
501	-0.0121567	501	0.0106879	501	-0.000863682		500	0.00116	500	-0.00660941	500	-0.00119
502	-0.0112433	502	0.0113273	502	-0.00137		501	0.00112	501	-0.00630404	501	-0.00167
503	-0.0105299	503	0.0117667	503	-0.00188		502	0.000974636	502	-0.00599866	502	-0.00214
504	-0.0100165	504	0.0120061	504	-0.00229		503	0.000932852	503	-0.00569329	503	-0.00262
505	-0.00960312	505	0.0121455	505	-0.0025		504	0.000791068	504	-0.00538792	504	-0.00299
506	-0.00928972	506	0.0121849	506	-0.00272		505	0.000549284	505	-0.00498255	505	-0.00336
507	-0.00897632	507	0.0122243	507	-0.00273		506	0.000107499	506	-0.00447718	506	-0.00354
508	-0.00856292	508	0.0123638	508	-0.00274		507	-0.000434285	507	-0.0041718	507	-0.00361
509	-0.00814951	509	0.0125032	509	-0.00265		508	-0.000776069	508	-0.00386643	508	-0.00369
510	-0.00763611	510	0.0127426	510	-0.00256		509	-0.00102	509	-0.00356106	509	-0.00356
511	-0.00732271	511	0.012782	511	-0.00247		510	-0.00106	510	-0.00335569	510	-0.00334
512	-0.00710931	512	0.0127214	512	-0.00248		511	-0.0011	511	-0.00305032	511	-0.00311
513	-0.0069959	513	0.0125608	513	-0.00249		512	-0.00124	512	-0.00274494	512	-0.00269
514	-0.0069825	514	0.0123002	514	-0.0024		513	-0.00148	513	-0.00243957	513	-0.00226
515	-0.0069691	515	0.0120397	515	-0.00221		514	-0.00163	514	-0.0022342	514	-0.00183
516	-0.00675569	516	0.0119791	516	-0.00192		515	-0.00187	515	-0.00212883	515	-0.00131
517	-0.00644229	517	0.0120185	517	-0.00143		516	-0.00201	516	-0.00192346	516	-0.000683841
518	-0.00602889	518	0.0121579	518	-0.000938301		517	-0.00215	517	-0.00171808	517	4.16387e-05
519	-0.00551549	519	0.0123973	519	-0.000448573		518	-0.00229	518	-0.00141271	518	0.000767119
520	-0.00500208	520	0.0126367	520	-5.88443e-05		519	-0.00244	519	-0.00130734	519	0.00139
521	-0.00438868	521	0.0129761	521	3.0884e-05		520	-0.00238	520	-0.00140197	520	0.00202
522	-0.00377528	522	0.0133155	522	2.06123e-05		521	-0.00222	521	-0.0014966	521	0.00254
523	-0.00316187	523	0.013655	523	1.03406e-05		522	-0.00186	522	-0.00159122	522	0.00287
524	-0.00264847	524	0.0138944	524	6.88393e-08		523	-0.0015	523	-0.00148585	523	0.00309
525	-0.00233507	525	0.0139338	525	8.97971e-05		524	-0.00124	524	-0.00128048	524	0.00342
526	-0.00202167	526	0.0139732	526	0.000179525		525	-0.000986402	525	-0.000875108	525	0.00365
527	-0.00160826	527	0.0141126	527	0.000390154		526	-0.000828186	526	-0.000569736	526	0.00367
528	-0.00119486	528	0.014252	528	0.000519445		527	-0.00066997	527	-0.000264364	527	0.0036
529	-0.000881458	529	0.0142914	529	0.000448737		528	-0.000611755	528	4.10081e-05	528	0.00332
530	-0.000568055	530	0.0143309	530	0.000278028		529	-0.000453539	529	0.00024638	529	0.00285
531	-0.000254653	531	0.0143703	531	-9.26801e-05		530	-0.000295323	530	0.000151752	530	0.00217
532	0.00015875	532	0.0145097	532	-0.000663389		531	-3.71075e-05	531	-4.28759e-05	531	0.0016
533	0.000572153	533	0.0146491	533	-0.00143		532	0.000121108	532	-0.000337504	532	0.00112
534	0.000985556	534	0.0147885	534	-0.0023		533	0.000279324	533	-0.000632132	533	0.000649319
535	0.00139896	535	0.0149279	535	-0.00318		534	0.00033754	534	-0.00092676	534	0.000174799
536	0.00151236	536	0.0147673	536	-0.00385		535	0.000295755	535	-0.00112139	535	-0.000199721
537	0.00152576	537	0.0145067	537	-0.00452		536	0.000253971	536	-0.00131602	536	-0.000574241
538	0.00153917	538	0.0142462	538	-0.00509		537	1.21869e-05	537	-0.00151064	537	-0.000948761
539	0.00155257	539	0.0139856	539	-0.00576		538	-0.000129597	538	-0.00160527	538	-0.00142
540	0.00166597	540	0.013825	540	-0.00653		539	-0.000271382	539	-0.0017999	539	-0.0017
541	0.00177938	541	0.0136644	541	-0.0074		540	-0.000413166	540	-0.00189453	540	-0.00197
542	0.00179278	542	0.0134038	542	-0.00827		541	-0.00045495	541	-0.00198916	541	-0.00215
543	0.00180618	543	0.0131432	543	-0.00904		542	-0.000496734	542	-0.00198378	542	-0.00222
544	0.00181958	544	0.0128826	544	-0.00981		543	-0.000338519	543	-0.00207841	543	-0.002
545	0.00183299	545	0.0126221	545	-0.01038		544	-0.000280303	544	-0.00207304	544	-0.00167
546	0.00174639	546	0.0122615	546	-0.01105		545	-0.000222087	545	-0.00206767	545	-0.00134
547	0.00135979	547	0.0116009	547	-0.01152		546	-0.000263872	546	-0.0017623	546	-0.00112
548	0.000973194	548	0.0109078	548	-0.01189		547	-0.000305656	547	-0.00145692	547	-0.000893961
549	0.000486597	549	0.0101061	549	-0.01217		548	-0.00034744	548	-0.00115155	548	-0.000668481
550	0	550	0.00930439	550	-0.01224		549	-0.000389224	549	-0.00094618	549	-0.000543001
551	-0.00037224	551	0.00870269	551	-0.01161		550	-0.000431009	550	-0.000840808	550	-0.000517521
552	-0.00074448	552	0.00810098	552	-0.01109		551	-0.000472793	551	-0.000535436	551	-0.000492041
553	-0.00121672	553	0.00739928	553	-0.01047		552	-0.000514577	552	-0.000130064	552	-0.000466561
554	-0.00178896	554	0.00659758	554	-0.00985		553	-0.000556361	553	0.000275308	553	-0.000341081
555	-0.0025612	555	0.00559587	555	-0.00902		554	-0.000398146	554	0.00068068	554	-0.000215601
556	-0.00343344	556	0.00449417	556	-0.008		555	-0.00023993	555	0.000886052	555	-9.01211e-05
557	-0.00430568	557	0.00339247	557	-0.00698		556	-8.17143e-05	556	0.000991424	556	-6.46411e-05
558	-0.00497792	558	0.00249077	558	-0.00596		557	-0.000123499	557	0.000996796	557	-0.000139161
559	-0.00565016	559	0.00158906	559	-0.00503		558	-0.000165283	558	0.000902168	558	-0.000213681
560	-0.0061224	560	0.000887359	560	-0.00411		559	-0.000407067	559	0.00080754	559	-0.000188201
561	-0.00679464	561	-1.43442e-05	561	-0.00339		560	-0.000648851	560	0.000612912	560	-0.000262721
562	-0.00726688	562	-0.000716047	562	-0.00297		561	-0.000890636	561	0.000518284	561	-0.000337241
563	-0.00683912	563	-0.000517751	563	-0.00304		562	-0.00113	562	0.000523656	562	-0.000411761
564	-0.00401136	564	0.00231672	564	-0.00352		563	-0.00127	563	0.000629028	563	-0.000486281
565	0.0030164	565	0.0094372	565	-0.0033		564	-0.00142	564	0.0009344	564	-0.000460801
566	0.0155442	566	0.0220577	566	-0.00157		565	-0.00136	565	0.00103977	565	-0.000435321
567	0.0340719	567	0.0406782	567	0.00251		566	-0.0014	566	0.00104514	566	-0.000309841
568	0.0577997	568	0.0644986	568	0.00988		567	-0.00124	567	0.000950516	567	-0.000184361
569	0.0855274	569	0.0923191	569	0.02045		568	-0.00118	568	0.000855888	568	-0.000158881
570	0.115955	570	0.12284	570	0.03352		569	-0.00122	569	0.00086126	569	-0.000333401
571	0.147883	571	0.15486	571	0.0483		570	-0.00117	570	0.000966632	570	-0.000407921
572	0.180511	572	0.187581	572	0.06417		571	-0.00111	571	0.001072	571	-0.000582441
573	0.213238	573	0.220401	573	0.08084		572	-0.000950263	572	0.00127738	572	-0.000556961
574	0.245666	574	0.252922	574	0.09811		573	-0.000792047	573	0.00168275	573	-0.000531481
575	0.277494	575	0.284842	575	0.11549		574	-0.000433831	574	0.00218812	574	-0.000406001
576	0.308522	576	0.315962	576	0.13306		575	-0.000175615	575	0.00259349	575	-0.000280521
577	0.33795	577	0.345483	577	0.15063		576	-1.73997e-05	576	0.00299886	576	-5.5041e-05
578	0.364977	578	0.372603	578	0.1682		577	4.08161e-05	577	0.00330424	577	7.0439e-05
579	0.387705	579	0.395424	579	0.18518		578	9.90318e-05	578	0.00340961	578	0.000195919
580	0.404433	580	0.412244	580	0.20055		579	5.72475e-05	579	0.00361498	579	0.000121399
581	0.413861	581	0.421765	581	0.21292		580	-8.45368e-05	580	0.00382035	580	4.6879e-05
582	0.415588	582	0.423585	582	0.22149		581	-0.000226321	581	0.00402572	581	7.2359e-05
583	0.410516	583	0.418606	583	0.22577		582	-0.000368105	582	0.0043311	582	9.7839e-05
584	0.399944	584	0.408126	584	0.22584		583	-0.00040989	583	0.00453647	583	0.000223319
585	0.385272	585	0.393547	585	0.22241		584	-0.000251674	584	0.00454184	584	0.000448799
586	0.367799	586	0.376167	586	0.21628		585	-0.000193458	585	0.00464721	585	0.000674279
587	0.348227	587	0.356688	587	0.20826		586	-0.000135242	586	0.00475258	586	0.000899759
588	0.327355	588	0.335908	588	0.19873		587	-0.000277027	587	0.00475796	587	0.00103
589	0.305483	589	0.314129	589	0.1882		588	-0.000518811	588	0.00456333	588	0.00105
590	0.28311	590	0.291849	590	0.17697		589	-0.000660595	589	0.0043687	589	0.00108
591	0.260838	591	0.26967	591	0.16525		590	-0.000702379	590	0.00407407	590	0.0011
592	0.239266	592	0.24819	592	0.15322		591	-0.000644164	591	0.00377944	591	0.00103
593	0.218694	593	0.227711	593	0.14119		592	-0.000485948	592	0.00368482	592	0.00105
594	0.199221	594	0.208331	594	0.12936		593	-0.000127732	593	0.00359019	593	0.00108
595	0.180949	595	0.190152	595	0.11804		594	0.000330483	594	0.00349556	594	0.0013
596	0.164077	596	0.173372	596	0.10741		595	0.000888699	595	0.00330093	595	0.00143
597	0.148405	597	0.157793	597	0.09728		596	0.00145	596	0.0031063	596	0.00155
598	0.134032	598	0.143513	598	0.08775		597	0.00191	597	0.00271168	597	0.00158
599	0.12096	599	0.130533	599	0.07903		598	0.00206	598	0.00221705	598	0.00141
600	0.108988	600	0.118654	600	0.0709		599	0.00192	599	0.00172242	599	0.00133
601	0.0981158	601	0.107874	601	0.06357		600	0.00188	600	0.00132779	600	0.00126
602	0.0881435	602	0.0979949	602	0.05694		601	0.00184	601	0.0010928	601	0.000924964
603	0.0791713	603	0.0891154	603	0.05092		602	0.002	602	0.000957803	602	0.000693449
604	0.070899	604	0.0809359	604	0.04529		603	0.00205	603	0.000822809	603	0.000561935
605	0.0633268	605	0.0734564	605	0.04016		604	0.00221	604	0.000787814	604	0.00043042
606	0.0562546	606	0.0664769	606	0.03554		605	0.00217	605	0.00095282	605	0.000398905
607	0.0498823	607	0.0601973	607	0.03121		606	0.00203	606	0.00111783	606	0.00026739
608	0.0439101	608	0.0543178	608	0.02728		607	0.00189	607	0.00118283	607	0.000135875
609	0.0385378	609	0.0490383	609	0.02375		608	0.00185	608	0.00124784	608	-9.56397e-05
610	0.0335656	610	0.0441588	610	0.02043		609	0.0016	609	0.00131284	609	-0.000227155
611	0.0288934	611	0.0395792	611	0.0174		610	0.00195	610	0.00177785	610	-0.000158669
612	0.0244211	612	0.0351997	612	0.01477		611	0.0044	611	0.00454285	611	0.00151
613	0.0202489	613	0.0311202	613	0.01244		612	0.01355	612	0.0139079	612	0.00778
614	0.0162766	614	0.0272407	614	0.01042		613	0.0355	613	0.0366729	613	0.02355
615	0.0126044	615	0.0236612	615	0.00859		614	0.07625	614	0.0789379	614	0.05332
616	0.00913215	616	0.0202816	616	0.00706		615	0.1387	615	0.144603	615	0.09928
617	0.00595991	617	0.0172021	617	0.00573		616	0.22235	616	0.233468	616	0.16025
618	0.00308767	618	0.0144226	618	0.00441		617	0.3238	617	0.342233	617	0.23282
619	0.000715431	619	0.0121431	619	0.00328		618	0.43855	618	0.465298	618	0.31239
620	-0.00135681	620	0.0101636	620	0.00225		619	0.56261	619	0.597763	619	0.39516
621	-0.00312905	621	0.00848404	621	0.00152		620	0.69266	620	0.735428	620	0.47873
622	-0.00460129	622	0.00710452	622	0.0011		621	0.82661	621	0.875693	621	0.56179
623	-0.00597353	623	0.005825	623	0.000768296		622	0.96266	622	1.01636	622	0.64366
624	-0.00724577	624	0.00464548	624	0.00074084		623	1.09901	623	1.15582	623	0.72343
625	-0.00841801	625	0.00356596	625	0.000813383		624	1.23376	624	1.29219	624	0.8003
626	-0.00959025	626	0.00248644	626	0.00109		625	1.36521	625	1.42345	625	0.87297
627	-0.0105625	627	0.00160692	627	0.00126		626	1.49026	626	1.54652	626	0.93964
628	-0.0114347	628	0.000827397	628	0.00153		627	1.60381	627	1.65628	627	0.99671
629	-0.012107	629	0.000247876	629	0.0018		628	1.69916	628	1.74575	628	1.03947
630	-0.0124792	630	-3.16444e-05	630	0.00208		629	1.77032	629	1.80851	629	1.06354
631	-0.0126515	631	-0.000111165	631	0.00215		630	1.81407	630	1.84078	630	1.06691
632	-0.0128237	632	-0.000190686	632	0.00222		631	1.83082	631	1.84264	631	1.05088
633	-0.0127109	633	-0.000170206	633	0.00209		632	1.82397	632	1.81811	632	1.01925
634	-0.0125982	634	-0.000149727	634	0.00207		633	1.79792	633	1.77257	633	0.97672
635	-0.0125854	635	-0.000229248	635	0.00194		634	1.75717	634	1.71164	634	0.92728
636	-0.0125727	636	-0.000308768	636	0.00181		635	1.70502	635	1.6396	635	0.87385
637	-0.0125599	637	-0.000388289	637	0.00148		636	1.64397	636	1.55967	636	0.81782
638	-0.0126472	638	-0.00056781	638	0.00116		637	1.57592	637	1.47413	637	0.76049
639	-0.0126344	639	-0.000647331	639	0.000728994		638	1.50287	638	1.3853	638	0.70276
640	-0.0125217	640	-0.000626851	640	0.000731168		639	1.42662	639	1.29526	639	0.64573
641	-0.0122089	641	-0.000406372	641	0.00147		640	1.34908	640	1.20613	640	0.5906
642	-0.0115962	642	-0.000177564	642	0.00221		641	1.27183	641	1.11949	641	0.53806
643	-0.0108834	643	-2.84264e-05	643	0.00275		642	1.19608	642	1.03646	642	0.48873
644	-0.0101707	644	0.000120711	644	0.00319		643	1.12243	643	0.957623	643	0.443
645	-0.00955793	645	0.000169848	645	0.00343		644	1.05128	644	0.883288	644	0.40077
646	-0.00904518	646	0.000118985	646	0.00357		645	0.98293	645	0.813653	645	0.36184
647	-0.00853243	647	6.81226e-05	647	0.00361		646	0.91738	646	0.748818	646	0.32621
648	-0.00791968	648	0.00011726	648	0.00355		647	0.85513	647	0.688683	647	0.29348
649	-0.00730693	649	0.000166397	649	0.00339		648	0.79618	648	0.633248	648	0.26374
650	-0.00669418	650	0.000215534	650	0.00293		649	0.74083	649	0.582313	649	0.23671
651	-0.00608142	651	0.000264672	651	0.00227		650	0.68879	650	0.535678	650	0.21238
652	-0.00536867	652	0.000413809	652	0.00171		651	0.64004	651	0.493243	651	0.19025
653	-0.00465592	653	0.000562946	653	0.00115		652	0.59429	652	0.454508	652	0.17032
654	-0.00394317	654	0.000712083	654	0.000585128		653	0.55154	653	0.419373	653	0.15219
655	-0.00333042	655	0.000761221	655	0.000124697		654	0.51159	654	0.387238	654	0.13585
656	-0.00271767	656	0.000810358	656	-0.000435735		655	0.47464	655	0.358003	655	0.12102
657	-0.00220492	657	0.000759495	657	-0.000896166		656	0.44029	656	0.331368	656	0.10749
658	-0.00159217	658	0.000808632	658	-0.00126		657	0.40854	657	0.307133	657	0.09526
659	-0.000979417	659	0.000857769	659	-0.00142		658	0.37889	658	0.284998	658	0.08403
660	-0.000366667	660	0.000906907	660	-0.00138		659	0.35134	659	0.264763	659	0.0738
661	0.000146084	661	0.000856044	661	-0.00114		660	0.32579	660	0.246328	660	0.06437
662	0.000658835	662	0.000805181	662	-0.000698323		661	0.30215	661	0.229493	661	0.05573
663	0.00127159	663	0.000854318	663	-0.00396		662	0.2803	662	0.214058	662	0.0479
664	0.00198434	664	0.00100346	664	-0.00991		663	0.26015	663	0.200123	663	0.04077
665	0.00279709	665	0.00125259	665	-0.01		664	0.2415	664	0.187288	664	0.03434
666	0.00360984	666	0.00150173	666	-0.01		665	0.22415	665	0.175753	665	0.02861
667	0.00442259	667	0.00175087	667	-0.00979		666	0.208	666	0.165118	666	0.02348
668	0.00513534	668	0.0019	668	-0.00959		667	0.19315	667	0.155383	667	0.01874
669	0.00574809	669	0.00194914	669	-0.00918		668	0.1796	668	0.146548	668	0.01461
670	0.00636084	670	0.00199828	670	-0.00888		669	0.16715	669	0.138513	669	0.01098
671	0.00677359	671	0.00184742	671	-0.00847		670	0.1559	670	0.131278	670	0.00775
672	0.00718634	672	0.00169655	672	-0.00786		671	0.14555	671	0.124843	671	0.00512
673	0.00759909	673	0.00154569	673	-0.00706		672	0.13601	672	0.119108	672	0.00299
674	0.00801185	674	0.00139483	674	-0.00625		673	0.12726	673	0.113873	673	0.00126
675	0.0084246	675	0.00124397	675	-0.00535		674	0.11911	674	0.109038	674	-7.56198e-05
676	0.00893735	676	0.0011931	676	-0.00444		675	0.11176	675	0.104603	675	-0.00111
677	0.0094501	677	0.00114224	677	-0.00344		676	0.10501	676	0.100568	676	-0.00204
678	0.00986285	678	0.000991377	678	-0.00253		677	0.09906	677	0.0969332	677	-0.00287
679	0.0101756	679	0.000740514	679	-0.00153		678	0.09361	678	0.0936982	678	-0.0035
680	0.0102884	680	0.000289651	680	-0.000720824		679	0.08876	679	0.0906632	679	-0.00413
681	0.0105011	681	-6.12113e-05	681	0.000184595		680	0.08451	680	0.0879282	680	-0.00456
682	0.0107139	682	-0.000412074	682	0.00153		681	0.08066	681	0.0851932	681	-0.005
683	0.0112266	683	-0.000462937	683	0.00372		682	0.07732	682	0.0827582	682	-0.00523
684	0.0119394	684	-0.0003138	684	0.00561		683	0.07437	683	0.0806232	683	-0.00536
685	0.0127521	685	-6.46623e-05	685	0.0072		684	0.07162	684	0.0785882	684	-0.00549
686	0.0134649	686	8.44749e-05	686	0.00849		685	0.06907	685	0.0766533	685	-0.00562
687	0.0142776	687	0.000333612	687	0.00958		686	0.06652	686	0.0746183	686	-0.00575
688	0.0148904	688	0.000382749	688	0.01027		687	0.06417	687	0.0726833	687	-0.00609
689	0.0155031	689	0.000431887	689	0.01086		688	0.06192	688	0.0709483	688	-0.00642
690	0.0161159	690	0.000481024	690	0.01115		689	0.06007	689	0.0694133	689	-0.00665
691	0.0164286	691	0.000230161	691	0.01105		690	0.05832	690	0.0681783	690	-0.00678
692	0.0166414	692	-0.000120702	692	0.01074		691	0.05687	691	0.0670433	691	-0.00648
693	0.0167541	693	0.00183957	693	0.01013		692	0.05542	692	0.0660083	692	-0.00608
694	0.0168669	694	0.00418897	694	0.00932		693	0.05408	693	0.0648733	693	-0.00558
695	0.0168796	695	0.00643837	695	0.00851		694	0.05253	694	0.0637383	694	-0.00518
696	0.0166924	696	0.00848778	696	0.0076		695	0.05108	695	0.0626033	695	-0.00478
697	0.0164051	697	0.0104372	697	0.00649		696	0.04953	696	0.0615683	696	-0.00459
698	0.0159179	698	0.0121866	698	0.00528		697	0.04798	697	0.0605333	697	-0.00429
699	0.0152306	699	0.013736	699	0.00407		698	0.04643	698	0.0594983	698	-0.00399
700	0.0145434	700	0.0152854	700	0.00296		699	0.04498	699	0.0585633	699	-0.00379
701	0.0137561	701	0.0167348	701	0.00206		700	0.04373	700	0.0576283	700	-0.00369
702	0.0129689	702	0.0181842	702	0.00125		701	0.04258	701	0.0565933	701	-0.00349
703	0.0120816	703	0.0195336	703	0.000537253		702	0.04163	702	0.0553583	702	-0.00329
704	0.0110944	704	0.020783	704	-0.000271752		703	0.04088	703	0.0541234	703	-0.00309
705	0.0102071	705	0.0221324	705	-0.000980756		704	0.04014	704	0.0528884	704	-0.00299
706	0.00931987	706	0.0229351	706	-0.00149		705	0.03929	705	0.0515534	705	-0.00289
707	0.00853262	707	0.0219702	707	-0.0019		706	0.03834	706	0.0503184	706	-0.00299
708	0.00774537	708	0.0210053	708	-0.00201		707	0.03739	707	0.0491834	707	-0.00309
709	0.00685813	709	0.0199404	709	-0.00202		708	0.03644	708	0.0479484	708	-0.0031
710	0.00597088	710	0.0188755	710	-0.00235		709	0.03559	709	0.0467134	709	-0.0031
711	0.00498363	711	0.0177106	711	-0.00372		710	0.03484	710	0.0453784	710	-0.0029
712	0.00409638	712	0.0166457	712	-0.00489		711	0.03399	711	0.0441434	711	-0.0026
713	0.00320913	713	0.0155809	713	-0.00566		712	0.03314	712	0.0429084	712	-0.0024
714	0.00222188	714	0.014416	714	-0.00613		713	0.03229	713	0.0416734	713	-0.0022
715	0.00113463	715	0.0131511	715	-0.0062		714	0.03145	714	0.0403384	714	-0.0019
716	4.73816e-05	716	0.0118862	716	-0.00607		715	0.0305	715	0.0392034	715	-0.0016
717	-0.00113987	717	0.0105213	717	-0.00584		716	0.02945	716	0.0382684	716	-0.0013
718	-0.00222712	718	0.00925642	718	-0.00542		717	0.0283	717	0.0374334	717	-0.000903788
719	-0.00331437	719	0.00799154	719	-0.00489		718	0.02695	718	0.0367984	718	-0.000604674
720	-0.00430161	720	0.00682665	720	-0.00416		719	0.0257	719	0.0360634	719	-0.00020556
721	-0.00518886	721	0.00576177	721	-0.00333		720	0.02435	720	0.0354284	720	-6.44669e-06
722	-0.00607611	722	0.00469688	722	-0.0025		721	0.0232	721	0.0346934	721	9.2667e-05
723	-0.00686336	723	0.00373199	723	-0.00167		722	0.02205	722	0.0339585	722	0.000191781
724	-0.00765061	724	0.00276711	724	-0.000743497		723	0.0211	723	0.0333235	723	0.000190894
725	-0.00833786	725	0.00190222	725	8.51832e-05		724	0.02035	724	0.0326885	724	0.000290008
726	-0.00882511	726	0.00123734	726	0.000913864		725	0.01971	725	0.0321535	725	0.000389122
727	-0.00901236	727	0.000872451	727	0.00164		726	0.01916	726	0.0318185	726	0.000388235
728	-0.00919961	728	0.000507565	728	0.00227		727	0.01861	727	0.0313835	727	0.000487349
729	-0.00928686	729	0.000242679	729	0.0027		728	0.01806	728	0.0310485	728	0.000586463
730	-0.00937411	730	-2.22065e-05	730	0.00303		729	0.01741	729	0.0307135	729	0.000685577
731	-0.00936136	731	-0.000187092	731	0.00306		730	0.01686	730	0.0302785	730	0.00078469
732	-0.0093486	732	-0.000351978	732	0.00289		731	0.01641	731	0.0298435	731	0.000883804
733	-0.00923585	733	-0.000416864	733	0.00251		732	0.01596	732	0.0292085	732	0.00108
734	-0.0091231	734	-0.00048175	734	0.00204		733	0.01571	733	0.0285735	733	0.00128
735	-0.00921035	735	-0.000746636	735	0.00147		734	0.01536	734	0.0279385	734	0.00138
736	-0.0092976	736	-0.000960492	736	0.000900669		735	0.01502	735	0.0273035	735	0.00148
737	-0.00948485	737	-0.0012371	737	0.00032935		736	0.01457	736	0.0266685	736	0.00158
738	-0.0096721	738	-0.0015137	738	-0.000229494		737	0.01412	737	0.0261335	737	0.00178
739	-0.00975935	739	-0.00169031	739	0.000281071		738	0.01367	738	0.0255985	738	0.00198
740	-0.0098466	740	-0.00186691	740	0.000491635		739	0.01322	739	0.0249635	739	0.00208
741	-0.00983385	741	-0.00194352	741	0.0005022		740	0.01287	740	0.0244286	740	0.00208
742	-0.0100211	742	-0.00222012	742	0.000412764		741	0.01242	741	0.0238936	741	0.00207
743	-0.0101083	743	-0.00239673	743	0.000223329		742	0.01197	742	0.0233586	742	0.00197
744	-0.0102956	744	-0.00267334	744	-6.61064e-05		743	0.01162	743	0.0227236	743	0.00197
745	-0.0102828	745	-0.00274994	745	-0.000455542		744	0.01127	744	0.0220886	744	0.00187
746	-0.0101701	746	-0.00272655	746	-0.000844977		745	0.01102	745	0.0214536	745	0.00197
747	-0.00995734	747	-0.00260315	747	-0.00133		746	0.01068	746	0.0209186	746	0.00197
748	-0.00974459	748	-0.00247976	748	-0.00172		747	0.01023	747	0.0204836	747	0.00177
749	-0.00963184	749	-0.00245636	749	-0.00211		748	0.00978	748	0.0201486	748	0.00157
750	-0.00951909	750	-0.00243297	750	-0.0025		749	0.00943	749	0.0198136	749	0.00137
751	-0.00968711	751	-0.00230957	751	-0.00274		750	0.00908	750	0.0194786	750	0.00127
752	-0.00975514	752	-0.00208618	752	-0.00298		751	0.00883	751	0.0192436	751	0.00137
753	-0.00972317	753	-0.00176278	753	-0.00323		752	0.00848	752	0.0190086	752	0.00157
754	-0.00959119	754	-0.00133939	754	-0.00337		753	0.00823	753	0.0187736	753	0.00176
755	-0.00955922	755	-0.001016	755	-0.00331		754	0.00778	754	0.0186386	754	0.00206
756	-0.00952724	756	-0.0006926	756	-0.00325		755	0.00713	755	0.0186036	755	0.00236
757	-0.00969527	757	-0.000569206	757	-0.00299		756	0.00638	756	0.0184686	756	0.00256
758	-0.00986329	758	-0.000445811	758	-0.00273		757	0.00564	757	0.0183336	757	0.00266
759	-0.00993132	759	-0.000222417	759	-0.00247		758	0.00479	758	0.0181986	758	0.00286
760	-0.00999934	760	9.77791e-07	760	-0.00231		759	0.00447	759	0.0182637	759	0.00296
761	-0.0100674	761	0.000224372	761	-0.00245		760	0.00426	760	0.0182287	760	0.00316
762	-0.0101354	762	0.000447767	762	-0.00279		761	0.00394	761	0.0182937	761	0.00336
763	-0.00920342	763	0.00100814	763	-0.00333		762	0.00382	762	0.0182587	762	0.00366
764	-0.00567144	764	0.00406554	764	-0.00378		763	0.00371	763	0.0181237	763	0.00396
765	0.00226053	765	0.0115229	765	-0.00369		764	0.00369	764	0.0179887	764	0.00425
766	0.0158925	766	0.0246803	766	-0.00192		765	0.00368	765	0.0176537	765	0.00455
767	0.0353245	767	0.0436377	767	0.00255		766	0.00386	766	0.0171187	766	0.00455
768	0.0596565	768	0.0674951	768	0.01001		767	0.00395	767	0.0162837	767	0.00455
769	0.0872884	769	0.0946525	769	0.02028		768	0.00383	768	0.0153487	768	0.00455
770	0.11722	770	0.12411	770	0.03245		769	0.00372	769	0.0146137	769	0.00455
771	0.148352	771	0.154767	771	0.04601		770	0.0036	770	0.0138787	770	0.00455
772	0.180284	772	0.186225	772	0.06048		771	0.00348	771	0.0131437	771	0.00455
773	0.212616	773	0.218082	773	0.07534		772	0.00347	772	0.0124087	772	0.00455
774	0.244948	774	0.24994	774	0.09081		773	0.00375	773	0.0115737	773	0.00465
775	0.27698	775	0.281497	775	0.10658		774	0.00404	774	0.0106387	774	0.00475
776	0.308212	776	0.312254	776	0.12254		775	0.00442	775	0.00980374	775	0.00484
777	0.337944	777	0.341512	777	0.13861		776	0.00471	776	0.00906875	776	0.00494
778	0.364976	778	0.368069	778	0.15448		777	0.00509	777	0.00853375	777	0.00504
779	0.387808	779	0.390427	779	0.16934		778	0.00528	778	0.00789876	778	0.00504
780	0.40444	780	0.406584	780	0.18241		779	0.00516	779	0.00736376	779	0.00494
781	0.413672	781	0.415341	781	0.19278		780	0.00484	780	0.00692877	780	0.00484
782	0.415504	782	0.416699	782	0.19964		781	0.00433	781	0.00659377	781	0.00454
783	0.410936	783	0.411656	783	0.20291		782	0.00381	782	0.00655878	782	0.00414
784	0.401168	784	0.401414	784	0.20298		783	0.0033	783	0.00662378	783	0.00364
785	0.3879	785	0.387671	785	0.20024		784	0.00308	784	0.00658879	784	0.00314
786	0.371932	786	0.371228	786	0.19551		785	0.00297	785	0.00645379	785	0.00274
787	0.354064	787	0.352886	787	0.18917		786	0.00285	786	0.0063188	786	0.00244
788	0.334796	788	0.333143	788	0.18154		787	0.00264	787	0.00618381	787	0.00213
789	0.314428	789	0.3123	789	0.17291		788	0.00242	788	0.00614881	788	0.00183
790	0.29366	790	0.291058	790	0.16337		789	0.0021	789	0.00621382	789	0.00143
791	0.272992	791	0.269915	791	0.15344		790	0.00159	790	0.00627882	790	0.000931512
792	0.253024	792	0.249473	792	0.14331		791	0.00107	791	0.00624383	791	0.000530625
793	0.234256	793	0.23023	793	0.13357		792	0.000557228	792	0.00610883	792	0.000129739
794	0.216588	794	0.212087	794	0.12424		793	4.16536e-05	793	0.00597384	793	-7.11474e-05
795	0.20012	795	0.195145	795	0.11541		794	-0.000373921	794	0.00583884	794	-7.20337e-05
796	0.184852	796	0.179402	796	0.10697		795	-0.000589495	795	0.00580385	795	-7.292e-05
797	0.170684	797	0.16476	797	0.09894		796	-0.000705069	796	0.00556885	796	2.61937e-05
798	0.157616	798	0.151217	798	0.09121		797	-0.000820644	797	0.00533386	797	0.000125307
799	0.145748	799	0.138874	799	0.08397		798	-0.000936218	798	0.00519887	798	0.000124421
800	0.13508	800	0.127732	800	0.07724		799	-0.00115	799	0.00506387	799	0.000123535
801	0.125312	801	0.117489	801	0.071		800	-0.00147	800	0.00492888	800	2.26484e-05
802	0.116244	802	0.107947	802	0.06507		801	-0.00178	801	0.00479388	801	-0.000178238
803	0.107976	803	0.0992041	803	0.05964		802	-0.0021	802	0.00475889	802	-0.000279124
804	0.100208	804	0.0909615	804	0.0546		803	-0.00251	803	0.00472389	803	-0.000480011
805	0.0930395	805	0.0833189	805	0.04997		804	-0.00283	804	0.0046889	804	-0.000580897
806	0.0863715	806	0.0761763	806	0.04574		805	-0.00315	805	0.0046539	805	-0.000481783
807	0.0801035	807	0.0694337	807	0.0418		806	-0.00346	806	0.00461891	806	-0.000382669
808	0.0742354	808	0.0630911	808	0.03797		807	-0.00368	807	0.00448391	807	-0.000183556
809	0.0687674	809	0.0571485	809	0.03414		808	-0.00389	808	0.00424892	808	-0.000184442
810	0.0636994	810	0.0516059	810	0.0302		809	-0.00391	809	0.00401392	809	-0.000385328
811	0.0589314	811	0.0463632	811	0.02637		810	-0.00392	810	0.00377893	810	-0.000586215
812	0.0544633	812	0.0414206	812	0.02253		811	-0.00404	811	0.00364394	811	-0.000787101
813	0.0501953	813	0.036678	813	0.0186		812	-0.00415	812	0.00340894	812	-0.000887987
814	0.0462273	814	0.0322354	814	0.01487		813	-0.00437	813	0.00327395	813	-0.000888874
815	0.0424593	815	0.0279928	815	0.01123		814	-0.00459	814	0.00313895	814	-0.00068976
816	0.0391912	816	0.0242502	816	0.0077		815	-0.0048	815	0.00290396	815	-0.000690646
817	0.0362232	817	0.0208076	817	0.00437		816	-0.00512	816	0.00246896	816	-0.000691533
818	0.0336552	818	0.017765	818	0.00133		817	-0.00533	817	0.00203397	817	-0.000692419
819	0.0313872	819	0.0150224	819	-0.0015		818	-0.00555	818	0.00139897	818	-0.000693305
820	0.0292191	820	0.0123798	820	-0.00403		819	-0.00566	819	0.000763979	819	-0.000694191
821	0.0272511	821	0.00993723	821	-0.00657		820	-0.00578	820	0.000328984	820	-0.000595078
822	0.0255831	822	0.00779463	822	-0.0088		821	-0.00589	821	-0.00010601	821	-0.000695964
823	0.0242151	823	0.00595203	823	-0.01063		822	-0.00601	822	-0.000341005	822	-0.00079685
824	0.023047	824	0.00430942	824	-0.01197		823	-0.00613	823	-0.000675999	823	-0.000797737
825	0.022179	825	0.00296682	825	-0.0127		824	-0.00614	824	-0.00101099	824	-0.000698623
826	0.021311	826	0.00162422	826	-0.01294		825	-0.00616	825	-0.00144599	825	-0.000399509
827	0.020743	827	0.000581618	827	-0.01267		826	-0.00607	826	-0.00178098	826	-0.000200396
828	0.0202749	828	-0.000360984	828	-0.012		827	-0.00589	827	-0.00211598	827	-1.28198e-06
829	0.0199069	829	8.91512e-06	829	-0.01114		828	-0.0057	828	-0.00235097	828	-2.16829e-06
830	0.0195389	830	0.000392714	830	-0.01017		829	-0.00552	829	-0.00258597	829	9.69454e-05
831	0.0191709	831	0.000776513	831	-0.0089		830	-0.00523	830	-0.00272096	830	0.000196059
832	0.0186028	832	0.000960311	832	-0.00744		831	-0.00485	831	-0.00265596	831	0.000395173
833	0.0180348	833	0.00114411	833	-0.00597		832	-0.00447	832	-0.00235608	832	0.000494286
834	0.0175668	834	0.00142791	834	-0.0045		833	-0.00398	833	-0.0019562	833	0.0006934
835	0.0169988	835	0.00161171	835	-0.00304		834	-0.0036	834	-0.00155632	834	0.000692514
836	0.0165307	836	0.00189551	836	-0.00177		835	-0.00321	835	-0.00125644	835	0.000591628
837	0.0157627	837	0.0018793	837	-0.000604713		836	-0.00303	836	-0.00105656	836	0.000390741
838	0.0148947	838	0.0017631	838	0.002		837	-0.00284	837	-0.00095668	837	0.000189855
839	0.0140267	839	0.0016469	839	0.0051		838	-0.00266	838	-0.000856801	838	-0.000111031
840	0.0130586	840	0.0014307	840	0.008		839	-0.00267	839	-0.000656921	839	-0.000411918
841	0.0121906	841	0.0013145	841	0.0107		840	-0.00259	840	-0.000357042	840	-0.000712804
842	0.0111226	842	0.000998298	842	0.01077		841	-0.00251	841	-0.000157163	841	-0.00101
843	0.0100546	843	0.000682097	843	0.01064		842	-0.00242	842	-5.72834e-05	842	-0.00111
844	0.00888653	844	0.000265896	844	0.01032		843	-0.00244	843	4.25959e-05	843	-0.00122
845	0.0077185	845	-0.000150306	845	0.00979		844	-0.00245	844	4.24753e-05	844	-0.00132
846	0.00655048	846	-0.000566507	846	0.00916		845	-0.00257	845	0.000142355	845	-0.00132
847	0.00568245	847	-0.000682708	847	0.00834		846	-0.00258	846	4.2234e-05	846	-0.00142
848	0.00491443	848	-0.00069891	848	0.00761		847	-0.0026	847	4.21133e-05	847	-0.00152
849	0.0043464	849	-0.000515111	849	0.00669		848	-0.00251	848	-5.80074e-05	848	-0.00172
850	0.00377838	850	-0.000331312	850	0.00586		849	-0.00243	849	-0.000158128	849	-0.00202
851	0.00339368	851	-0.000147513	851	0.00493		850	-0.00245	850	-0.000358249	850	-0.00222
852	0.00328364	852	3.62853e-05	852	0.00421		851	-0.00236	851	-0.000558369	851	-0.00222
853	0.0031736	853	0.000220084	853	0.00368		852	-0.00238	852	-0.00065849	852	-0.00202
854	0.00306356	854	0.000403883	854	0.00305		853	-0.00249	853	-0.000758611	853	-0.00172
855	0.00275353	855	0.000387681	855	0.00243		854	-0.00241	854	-0.000758731	854	-0.00153
856	0.00264349	856	0.00057148	856	0.0019		855	-0.00252	855	-0.000758852	855	-0.00143
857	0.00263345	857	0.000855279	857	0.00147		856	-0.00254	856	-0.000558973	856	-0.00143
858	0.00282342	858	0.00133908	858	0.00125		857	-0.00246	857	-0.000359093	857	-0.00143
859	0.00311338	859	0.00192288	859	0.00112		858	-0.00227	858	-0.000159214	858	-0.00133
860	0.00340334	860	0.00250667	860	0.0011		859	-0.00209	859	4.06654e-05	859	-0.00123
861	0.0034933	861	0.00289047	861	0.000969021		860	-0.0018	860	0.000240545	860	-0.00113
862	0.00348327	862	0.00317427	862	0.000842657		861	-0.00152	861	0.000540424	861	-0.000931417
863	0.00327323	863	0.00325807	863	0.000816294		862	-0.00133	862	0.000740303	862	-0.000732303
864	0.00276319	864	0.00304187	864	0.00088993		863	-0.00115	863	0.00104018	863	-0.000333189
865	0.00205316	865	0.00262567	865	0.000963566		864	-0.000964121	864	0.00134006	864	0.000165925
866	0.00144312	866	0.00230947	866	0.000937202		865	-0.000779695	865	0.00173994	865	0.000465038
867	0.000733082	867	0.00189327	867	0.000810838		866	-0.00069527	866	0.00213982	866	0.000464152
868	0.000223045	868	0.00167706	868	0.000484475		867	-0.000410844	867	0.0025397	867	0.000363266
869	-0.000186992	869	0.00156086	869	0.000158111		868	-0.000226418	868	0.00283958	868	0.000162379
870	-0.000697029	870	0.00134466	870	-6.8253e-05		869	5.80074e-05	869	0.00303946	869	6.1493e-05
871	-0.00130707	871	0.00102846	871	-0.000194617		870	0.000242433	870	0.00323934	870	0.000160607
872	-0.0020171	872	0.000612259	872	-0.000420981		871	0.000326859	871	0.00343922	871	0.00035972
873	-0.00282714	873	9.60581e-05	873	-0.000647344		872	0.000411284	872	0.0035391	872	0.000458834
874	-0.00363718	874	-0.000420143	874	-0.000773708		873	0.00039571	873	0.00363898	873	0.000357948
875	-0.00444722	875	-0.000936345	875	-0.000800072		874	0.000380136	874	0.00363886	874	0.000257061
876	-0.00545725	876	-0.00165255	876	-0.000726436		875	0.000364562	875	0.00353873	875	-4.38249e-05
877	-0.00646729	877	-0.00236875	877	-0.0005528		876	0.000348987	876	0.00353861	876	-0.000444711
878	-0.00737733	878	-0.00298495	878	-0.000379163		877	0.000333413	877	0.00333849	877	-0.000745598
879	-0.00828736	879	-0.00360115	879	-0.000105527		878	0.000317839	878	0.00303837	878	-0.00105
880	-0.0089974	880	-0.00401735	880	0.000268109		879	0.000202264	879	0.00253825	879	-0.00135
881	-0.00970744	881	-0.00443355	881	0.000325472		880	8.66902e-05	880	0.00193813	880	-0.00155
882	-0.0104175	882	-0.00484975	882	0.000362931		881	7.11159e-05	881	0.00143801	881	-0.00165
883	-0.0112275	883	-0.00536595	883	0.00060039		882	5.55416e-05	882	0.00103789	882	-0.00155
884	-0.0121375	884	-0.00598216	884	0.00104		883	3.99673e-05	883	0.000637769	883	-0.00155
885	-0.0131476	885	-0.00669836	885	0.00138		884	0.000124393	884	0.000437649	884	-0.00145
886	-0.0143576	886	-0.00761456	886	0.00171		885	0.000308819	885	3.75282e-05	885	-0.00145
887	-0.0155677	887	-0.00853076	887	0.00185		886	0.000493244	886	-0.000262593	886	-0.00135
888	-0.0167777	888	-0.00894113	888	0.00199		887	0.00077767	887	-0.000662713	887	-0.00135
889	-0.0178877	889	-0.0089403	889	0.00223		888	0.00106	888	-0.000962834	888	-0.00136
890	-0.0190978	890	-0.00903947	890	0.00236		889	0.00145	889	-0.00136295	889	-0.00126
891	-0.0202078	891	-0.00903863	891	0.0026		890	0.00193	890	-0.00176308	890	-0.00126
892	-0.0213178	892	-0.0090378	892	0.00284		891	0.00232	891	-0.0022632	891	-0.00126
893	-0.0224279	893	-0.00903697	893	0.00297		892	0.0027	892	-0.00276332	892	-0.00126
894	-0.0233379	894	-0.00883614	894	0.00291		893	0.00298	893	-0.00316344	893	-0.00136
895	-0.024348	895	-0.00873531	895	0.00285		894	0.00327	894	-0.00336356	894	-0.00136
896	-0.025358	896	-0.00863447	896	0.00279		895	0.00355	895	-0.00336368	895	-0.00126
897	-0.026368	897	-0.00853364	897	0.00282		896	0.00394	896	-0.0033638	896	-0.00116
898	-0.0273781	898	-0.00843281	898	0.00266		897	0.00442	897	-0.00346392	897	-0.00126
899	-0.0284881	899	-0.00843198	899	0.0022		898	0.00471	898	-0.00356404	898	-0.00146
900	-0.0294981	900	-0.00833115	900	0.00174		899	0.00499	899	-0.00356416	899	-0.00167
901	-0.0303082	901	-0.00803031	901	0.00117		900	0.00518	900	-0.00346428	900	-0.00197
902	-0.0309182	902	-0.00752948	902	0.000712111		901	0.00536	901	-0.00340178	901	-0.00223
903	-0.0313283	903	-0.00682865	903	0.00024957		902	0.00564	902	-0.00333928	902	-0.0024
904	-0.0316383	904	-0.00602782	904	-0.000312971		903	0.00593	903	-0.00337678	903	-0.00266
905	-0.0319483	905	-0.00522699	905	-0.000393898		904	0.00621	904	-0.00331428	904	-0.00303
906	-0.0321584	906	-0.00432616	906	-0.000289663		905	0.0065	905	-0.00325178	905	-0.0034
907	-0.0322684	907	-0.00332532	907	-0.000385429		906	0.00678	906	-0.00318928	906	-0.00356
908	-0.0322784	908	-0.00222449	908	-0.000381194		907	0.00717	907	-0.00302678	907	-0.00353
909	-0.0322885	909	-0.00112366	909	-0.000376959		908	0.00745	908	-0.00276428	908	-0.00339
910	-0.0321985	910	7.71721e-05	910	-0.000272724		909	0.00746	909	-0.00260178	909	-0.00326
911	-0.0322086	911	0.001178	911	-0.000168489		910	0.00768	910	-0.00203928	910	-0.00293
912	-0.0321186	912	0.00237884	912	-0.000164254		911	0.01009	911	0.000923222	911	-0.000892699
913	-0.0321286	913	0.00347967	913	-0.000260019		912	0.019	912	0.0110857	912	0.00634
914	-0.0320387	914	0.00299791	914	-0.000355784		913	0.04091	913	0.0351482	913	0.02338
915	-0.0319487	915	0.00215186	915	-0.000551549		914	0.08173	914	0.0794107	914	0.05391
916	-0.0317587	916	0.00140581	916	-0.000647314		915	0.14474	915	0.146773	915	0.09914
917	-0.0316688	917	0.000559768	917	-0.000843079		916	0.22885	916	0.236436	916	0.15728
918	-0.0313788	918	-8.62792e-05	918	-0.00114		917	0.33046	917	0.344398	917	0.22481
919	-0.0310888	919	-0.000732326	919	-0.00153		918	0.44468	918	0.465161	918	0.29804
920	-0.0306989	920	-0.00127837	920	-0.00193		919	0.56689	919	0.593923	919	0.37398
921	-0.0301089	921	-0.00162442	921	-0.00233		920	0.6941	920	0.726786	920	0.45081
922	-0.029519	922	-0.00197047	922	-0.00252		921	0.82401	921	0.861448	921	0.52745
923	-0.028929	923	-0.00231651	923	-0.00272		922	0.95493	922	0.995911	922	0.60328
924	-0.028139	924	-0.00246256	924	-0.00281		923	1.08544	923	1.12857	923	0.67741
925	-0.0273491	925	-0.00260861	925	-0.00301		924	1.21375	924	1.25784	924	0.74915
926	-0.0263591	926	-0.00255465	926	-0.0033		925	1.33806	925	1.3817	925	0.81708
927	-0.0252691	927	-0.0024007	927	-0.0036		926	1.45538	926	1.49696	926	0.87952
928	-0.0240792	928	-0.00214675	928	-0.0037		927	1.56039	927	1.59822	927	0.93255
929	-0.0227892	929	-0.0017928	929	-0.00359		928	1.6464	928	1.67839	928	0.97168
930	-0.0213993	930	-0.00133884	930	-0.00329		929	1.70741	929	1.73135	929	0.99322
931	-0.0198093	931	-0.000684889	931	-0.00278		930	1.74033	930	1.75421	930	0.99625
932	-0.0183193	932	-0.000130936	932	-0.00218		931	1.74614	931	1.74817	931	0.98259
933	-0.0168294	933	0.000423017	933	-0.00148		932	1.72835	932	1.71744	932	0.95602
934	-0.0155394	934	0.00077697	934	-0.00114		933	1.69216	933	1.6679	933	0.92045
935	-0.0143494	935	0.00103092	935	-0.000707485		934	1.64228	934	1.60476	934	0.87899
936	-0.0132595	936	0.00118488	936	-0.000170681		935	1.58229	935	1.53192	935	0.83382
937	-0.0122695	937	0.00123883	937	0.000466123		936	1.5146	936	1.45249	936	0.78606
938	-0.0112796	938	0.00129278	938	0.0011		937	1.44131	937	1.36855	937	0.73659
939	-0.0104896	939	0.00114674	939	0.00184		938	1.36413	938	1.28221	938	0.68642
940	-0.00959963	940	0.00110069	940	0.00248		939	1.28494	939	1.19527	939	0.63676
941	-0.00860967	941	0.00115464	941	0.00331		940	1.20575	940	1.10974	940	0.58859
942	-0.0076197	942	0.00120859	942	0.00415		941	1.12786	941	1.0271	941	0.54273
943	-0.00662974	943	0.00126255	943	0.00519		942	1.05248	942	0.948261	942	0.49946
944	-0.00563978	944	0.0013165	944	0.00622		943	0.98029	943	0.873923	943	0.45889
945	-0.00464981	945	0.00137045	945	0.00736		944	0.9114	944	0.804286	944	0.42113
946	-0.00375985	946	0.00132441	946	0.0083		945	0.84601	945	0.739248	945	0.38596
947	-0.00286989	947	0.00127836	947	0.00923		946	0.78413	946	0.678911	946	0.3533
948	-0.00197993	948	0.00123231	948	0.01007		947	0.72584	947	0.623073	947	0.32313
949	-0.000989963	949	0.00128627	949	0.01091		948	0.67135	948	0.571636	948	0.29536
950	-3.69482e-13	950	0.00134022	950	0.01174		949	0.62046	949	0.524498	949	0.27
951	0.000615135	951	0.00129417	951	0.01231		950	0.57318	950	0.481361	950	0.24673
952	0.00133027	952	0.00134813	952	0.01277		951	0.52929	951	0.442023	951	0.22536
953	0.0019454	953	0.00130208	953	0.01303		952	0.4885	952	0.406086	952	0.2058
954	0.00256054	954	0.00125603	954	0.01309		953	0.45081	953	0.373448	953	0.18763
955	0.00317567	955	0.00120999	955	0.01315		954	0.41593	954	0.343611	954	0.17087
956	0.00369081	956	0.00106394	956	0.01311		955	0.38374	955	0.316373	955	0.1553
957	0.00410594	957	0.000817891	957	0.01317		956	0.35395	956	0.291536	956	0.14093
958	0.00462108	958	0.000671844	958	0.01303		957	0.32656	957	0.268998	957	0.12757
959	0.00503621	959	0.000425797	959	0.0128		958	0.30128	958	0.248361	958	0.1153
960	0.00535135	960	7.97505e-05	960	0.01236		959	0.27799	959	0.229623	959	0.10394
961	0.00546648	961	-0.000346292	961	0.01162		960	0.2565	960	0.212486	960	0.09357
962	0.00548162	962	-0.000118795	962	0.01038		961	0.23681	961	0.196748	961	0.0839
963	0.00629675	963	0.000908702	963	0.00874		962	0.21893	962	0.182411	962	0.07494
964	0.00931189	964	0.0041362	964	0.0072		963	0.20254	963	0.169373	963	0.06667
965	0.016327	965	0.0113637	965	0.00666		964	0.18755	964	0.157336	964	0.05901
966	0.0285422	966	0.0237912	966	0.00822		965	0.17386	965	0.146398	965	0.05194
967	0.0461573	967	0.0416187	967	0.01239		966	0.16148	966	0.136461	966	0.04547
968	0.0684724	968	0.0641462	968	0.01935		967	0.15009	967	0.127523	967	0.03941
969	0.0942876	969	0.0901737	969	0.02871		968	0.1397	968	0.119186	968	0.03374
970	0.122303	970	0.118401	970	0.03987		969	0.13031	969	0.111548	969	0.02858
971	0.151618	971	0.147929	971	0.05213		970	0.12163	970	0.104711	970	0.02371
972	0.181633	972	0.178156	972	0.06509		971	0.11384	971	0.0985732	971	0.01944
973	0.212048	973	0.208784	973	0.07855		972	0.10665	972	0.0930357	972	0.01558
974	0.242463	974	0.239411	974	0.09241		973	0.10026	973	0.0881982	973	0.01221
975	0.272478	975	0.269639	975	0.10648		974	0.09438	974	0.0837607	974	0.00925
976	0.301794	976	0.299166	976	0.12074		975	0.08899	975	0.0797232	975	0.00658
977	0.329709	977	0.327294	977	0.1353		976	0.0841	976	0.0760857	976	0.00431
978	0.355424	978	0.353221	978	0.14976		977	0.07971	977	0.0729482	977	0.00235
979	0.377439	979	0.375449	979	0.16362		978	0.07573	978	0.0701107	978	0.000780939
980	0.394054	980	0.392276	980	0.17568		979	0.07214	979	0.0676732	979	-0.000685127
981	0.403969	981	0.402404	981	0.18504		980	0.06885	980	0.0654357	980	-0.00185
982	0.406984	982	0.405631	982	0.1911		981	0.06556	981	0.0633982	981	-0.00282
983	0.403799	983	0.402659	983	0.19377		982	0.06268	982	0.0614607	982	-0.00348
984	0.395615	984	0.394686	984	0.19353		983	0.05999	983	0.0598232	983	-0.00405
985	0.38373	985	0.383014	985	0.19089		984	0.0577	984	0.0582857	984	-0.00432
986	0.369245	986	0.368741	986	0.18635		985	0.05571	985	0.0568482	985	-0.00438
987	0.35296	987	0.352669	987	0.18041		986	0.05383	986	0.0554107	986	-0.00428
988	0.335175	988	0.335096	988	0.17347		987	0.05194	987	0.0540732	987	-0.00407
989	0.31629	989	0.316424	989	0.16563		988	0.05015	988	0.0527357	988	-0.00386
990	0.297005	990	0.297351	990	0.15739		989	0.04856	989	0.0513982	989	-0.00376
991	0.277821	991	0.278379	991	0.14896		990	0.04708	990	0.0500607	990	-0.00375
992	0.259036	992	0.259806	992	0.14042		991	0.04569	991	0.0487232	991	-0.00355
993	0.240951	993	0.241934	993	0.13208		992	0.0445	992	0.0474857	992	-0.00344
994	0.223566	994	0.224761	994	0.12414		993	0.04341	993	0.0462482	993	-0.00333
995	0.207081	995	0.208489	995	0.1165		994	0.04243	994	0.0450107	994	-0.00333
996	0.191496	996	0.193116	996	0.10946		995	0.04164	995	0.0436732	995	-0.00352
997	0.177011	997	0.178844	997	0.10292		996	0.04095	996	0.0425357	996	-0.00382
998	0.163726	998	0.165771	998	0.09698		997	0.04036	997	0.0412982	997	-0.00401
999	0.151442	999	0.153699	999	0.09145		998	0.03968	998	0.0401607	998	-0.0042
1000	0.140257	1000	0.142726	1000	0.08651		999	0.03899	999	0.0390232	999	-0.0042
1001	0.129972	1001	0.132654	1001	0.08187		1000	0.0383	1000	0.0379857	1000	-0.00419
1002	0.120387	1002	0.123281	1002	0.07763		1001	0.03771	1001	0.0371482	1001	-0.00418
1003	0.111602	1003	0.114709	1003	0.07369		1002	0.03703	1002	0.0363107	1002	-0.00408
1004	0.103317	1004	0.106636	1004	0.06995		1003	0.03644	1003	0.0356732	1003	-0.00397
1005	0.0956324	1005	0.0991636	1005	0.06621		1004	0.03575	1004	0.0351357	1004	-0.00387
1006	0.0884475	1006	0.0921911	1006	0.06257		1005	0.03507	1005	0.0344982	1005	-0.00366
1007	0.0816627	1007	0.0856186	1007	0.05894		1006	0.03428	1006	0.0338608	1006	-0.00345
1008	0.0754778	1008	0.0796461	1008	0.0554		1007	0.03359	1007	0.0333233	1007	-0.00325
1009	0.0696929	1009	0.0740736	1009	0.05206		1008	0.0328	1008	0.0327858	1008	-0.00304
1010	0.0643081	1010	0.0689011	1010	0.04882		1009	0.03202	1009	0.0324483	1009	-0.00254
1011	0.0593232	1011	0.0641286	1011	0.04568		1010	0.03113	1010	0.0321108	1010	-0.00183
1012	0.0546384	1012	0.0596561	1012	0.04244		1011	0.03024	1011	0.0317733	1011	-0.000824412
1013	0.0500535	1013	0.0552836	1013	0.0391		1012	0.02945	1012	0.0313358	1012	8.16303e-05
1014	0.0457686	1014	0.0512111	1014	0.03586		1013	0.02877	1013	0.0309983	1013	0.000987673
1015	0.0415838	1015	0.0472386	1015	0.03263		1014	0.02828	1014	0.0306608	1014	0.00169
1016	0.0374989	1016	0.0433661	1016	0.02969		1015	0.02779	1015	0.0304233	1015	0.0022
1017	0.033614	1017	0.0396936	1017	0.02695		1016	0.0274	1016	0.0300858	1016	0.00261
1018	0.0299292	1018	0.036221	1018	0.02421		1017	0.02692	1017	0.0296483	1017	0.00301
1019	0.0265443	1019	0.0330485	1019	0.02167		1018	0.02653	1018	0.0292108	1018	0.00342
1020	0.0234594	1020	0.030176	1020	0.01923		1019	0.02624	1019	0.0286733	1019	0.00382
1021	0.0206746	1021	0.0276035	1021	0.01699		1020	0.02585	1020	0.0282358	1020	0.00413
1022	0.0181897	1022	0.025331	1022	0.01505		1021	0.02547	1021	0.0278983	1021	0.00444
1023	0.0159048	1023	0.0232585	1023	0.01322		1022	0.02498	1022	0.0275608	1022	0.00464
1024	0.01382	1024	0.021386	1024	0.01158		1023	0.02449	1023	0.0271233	1023	0.00465
1025	0.0120852	1025	0.0198135	1025	0.01014		1024	0.024	1024	0.0265858	1024	0.00445
1026	0.0105701	1026	0.0181699	1026	0.0088		1025	0.02342	1025	0.0260483	1025	0.00416
1027	0.00905502	1027	0.0162922	1027	0.00776		1026	0.02283	1026	0.0256108	1026	0.00377
1028	0.00763994	1028	0.0145145	1028	0.00692		1027	0.02204	1027	0.0251733	1027	0.00347
1029	0.00622486	1029	0.0127368	1029	0.00618		1028	0.02125	1028	0.0248358	1028	0.00318
1030	0.00490977	1030	0.0110591	1030	0.00554		1029	0.02027	1029	0.0244983	1029	0.00298
1031	0.00379469	1031	0.00958144	1031	0.00491		1030	0.01928	1030	0.0239608	1030	0.00289
1032	0.00277961	1032	0.00820374	1032	0.00427		1031	0.01829	1031	0.0233233	1031	0.0027
1033	0.00196453	1033	0.00702604	1033	0.00393		1032	0.0175	1032	0.0225858	1032	0.0026
1034	0.00124945	1034	0.00594833	1034	0.00294		1033	0.01672	1033	0.0218483	1033	0.00231
1035	0.000834367	1035	0.00517063	1035	0.00226		1034	0.01593	1034	0.0210108	1034	0.00201
1036	0.000519285	1036	0.00449293	1036	0.00167		1035	0.01524	1035	0.0200733	1035	0.00162
1037	0.000104204	1037	0.00371523	1037	0.00119		1036	0.01435	1036	0.0191358	1036	0.00133
1038	-0.000310878	1038	0.00293753	1038	0.000904359		1037	0.01357	1037	0.0181983	1037	0.00113
1039	-0.000725959	1039	0.00215983	1039	0.000719603		1038	0.01278	1038	0.0172608	1038	0.00114
1040	-0.00124104	1040	0.00128212	1040	0.000534847		1039	0.01209	1039	0.0163233	1039	0.00124
1041	-0.00175612	1041	0.000649539	1041	0.00045009		1040	0.0115	1040	0.0154858	1040	0.00155
1042	-0.0022712	1042	0.000425206	1042	0.000565334		1041	0.01102	1041	0.0145483	1041	0.00186
1043	-0.00278629	1043	0.000200872	1043	0.000780577		1042	0.01053	1042	0.0138108	1042	0.00216
1044	-0.00330137	1044	-2.34616e-05	1044	0.000895821		1043	0.01004	1043	0.0131733	1043	0.00237
1045	-0.00371645	1045	-0.000147795	1045	0.000911065		1044	0.00955	1044	0.0127358	1044	0.00247
1046	-0.00423153	1046	-0.000372129	1046	0.000926308		1045	0.00907	1045	0.0122983	1045	0.00268
1047	-0.00454661	1047	-0.000396462	1047	0.000941552		1046	0.00858	1046	0.0119608	1046	0.00279
1048	-0.00496169	1048	-0.000520796	1048	0.00116		1047	0.00809	1047	0.0116233	1047	0.00289
1049	-0.00537677	1049	-0.00064513	1049	0.00157		1048	0.0075	1048	0.0114858	1048	0.003
1050	-0.00589186	1050	-0.000869463	1050	0.00199		1049	0.00702	1049	0.0113483	1049	0.00311
1051	-0.00650694	1051	-0.0011938	1051	0.0025		1050	0.00653	1050	0.0113108	1050	0.00311
1052	-0.00712202	1052	-0.00151813	1052	0.00282		1051	0.00604	1051	0.0112733	1051	0.00302
1053	-0.0078371	1053	-0.00194246	1053	0.00313		1052	0.00565	1052	0.0113358	1052	0.00292
1054	-0.00855218	1054	-0.0023668	1054	0.00335		1053	0.00537	1053	0.0111983	1053	0.00273
1055	-0.00926726	1055	-0.00279113	1055	0.00346		1054	0.00508	1054	0.0110608	1054	0.00254
1056	-0.00998234	1056	-0.00321546	1056	0.00348		1055	0.00479	1055	0.0109233	1055	0.00224
1057	-0.0104974	1057	-0.0034398	1057	0.00349		1056	0.0045	1056	0.0107858	1056	0.00185
1058	-0.0110125	1058	-0.00366413	1058	0.00351		1057	0.00412	1057	0.0105483	1057	0.00145
1059	-0.0114276	1059	-0.00378847	1059	0.00362		1058	0.00363	1058	0.0102108	1058	0.00116
1060	-0.0116427	1060	-0.0037128	1060	0.00384		1059	0.00349	1059	0.00967327	1059	0.000965628
1061	-0.0117578	1061	-0.00353713	1061	0.00405		1060	0.00326	1060	0.00903577	1060	0.00087167
1062	-0.0117728	1062	-0.00326147	1062	0.00407		1061	0.00292	1061	0.00849827	1061	0.000677713
1063	-0.0119879	1063	-0.0031858	1063	0.00399		1062	0.00259	1062	0.00806077	1062	0.000583755
1064	-0.012303	1064	-0.00321013	1064	0.0035		1063	0.00215	1063	0.00762327	1063	0.000389798
1065	-0.0126181	1065	-0.00323447	1065	0.0031		1064	0.00172	1064	0.00728577	1064	0.00029584
1066	-0.0129332	1066	-0.0032588	1066	0.0027		1065	0.00128	1065	0.00694827	1065	0.000301883
1067	-0.0131482	1067	-0.00318313	1067	0.00219		1066	0.000944526	1066	0.00661077	1066	0.000307925
1068	-0.0133633	1068	-0.00310747	1068	0.00158		1067	0.000609011	1067	0.00627327	1067	0.000213968
1069	-0.0133784	1069	-0.0028318	1069	0.000875995		1068	0.000373495	1068	0.00603577	1068	0.00022001
1070	-0.0134935	1070	-0.00265613	1070	0.000169479		1069	-6.20201e-05	1069	0.00569827	1069	0.000226053
1071	-0.0136086	1071	-0.00248047	1071	-0.000637036		1070	-0.000497536	1070	0.00536077	1070	0.000432095
1072	-0.0137236	1072	-0.0023048	1072	-0.00154		1071	-0.00103	1071	0.00492327	1071	0.000538138
1073	-0.0137387	1073	-0.00202914	1073	-0.00255		1072	-0.00137	1072	0.00448577	1072	0.00074418
1074	-0.0139538	1074	-0.00195347	1074	-0.00366		1073	-0.0016	1073	0.00414827	1073	0.000850223
1075	-0.0141689	1075	-0.0018778	1075	-0.00496		1074	-0.00174	1074	0.00391077	1074	0.000956265
1076	-0.014584	1076	-0.00200214	1076	-0.00627		1075	-0.00178	1075	0.00377327	1075	0.000862308
1077	-0.0150991	1077	-0.00222647	1077	-0.00748		1076	-0.00151	1076	0.00383577	1076	0.00066835
1078	-0.0156141	1078	-0.0024508	1078	-0.00868		1077	-0.00105	1077	0.00379827	1077	0.000574393
1079	-0.0161292	1079	-0.00267514	1079	-0.00979		1078	-0.000481659	1078	0.00356077	1078	0.000580435
1080	-0.0164443	1080	-0.00269947	1080	-0.0108		1079	0.000182826	1079	0.00322327	1079	0.000486478
1081	-0.0167594	1081	-0.0027238	1081	-0.0116		1080	0.000647311	1080	0.00278577	1080	0.00059252
1082	-0.0171745	1082	-0.00284814	1082	-0.01211		1081	0.00101	1081	0.00234827	1081	0.000698563
1083	-0.0175895	1083	-0.00297247	1083	-0.01242		1082	0.00118	1082	0.00211077	1082	0.000904605
1084	-0.0181046	1084	-0.00319681	1084	-0.01261		1083	0.00144	1083	0.00187327	1083	0.00101
1085	-0.0187197	1085	-0.00352114	1085	-0.01281		1084	0.00161	1084	0.00173577	1084	0.00112
1086	-0.0193348	1086	-0.00384547	1086	-0.01281		1085	0.00197	1085	0.00159827	1085	0.00112
1087	-0.0199499	1087	-0.00416981	1087	-0.0127		1086	0.00223	1086	0.00146077	1086	0.00103
1088	-0.020365	1088	-0.00429414	1088	-0.0125		1087	0.0025	1087	0.00122327	1087	0.000834818
1089	-0.02068	1089	-0.00431847	1089	-0.0119		1088	0.00276	1088	0.000985775	1088	0.00074086
1090	-0.0208951	1090	-0.00424281	1090	-0.01109		1089	0.00283	1089	0.000748275	1089	0.000646903
1091	-0.0212102	1091	-0.00426714	1091	-0.00999		1090	0.00279	1090	0.000610775	1090	0.000552945
1092	-0.0215253	1092	-0.00429147	1092	-0.00889		1091	0.00266	1091	0.000373276	1091	0.000658988
1093	-0.0219404	1093	-0.00441581	1093	-0.00758		1092	0.00232	1092	3.57759e-05	1092	0.00066503
1094	-0.0223554	1094	-0.00454014	1094	-0.00638		1093	0.00209	1093	-0.000101724	1093	0.000571073
1095	-0.0227705	1095	-0.00466447	1095	-0.00518		1094	0.00185	1094	-0.000339224	1094	0.000577115
1096	-0.0231856	1096	-0.00478881	1096	-0.00397		1095	0.00161	1095	-0.000376723	1095	0.000483158
1097	-0.0235007	1097	-0.00481314	1097	-0.00307		1096	0.00138	1096	-0.000199758	1096	0.0002892
1098	-0.0237158	1098	-0.00473748	1098	-0.00227		1097	0.00124	1097	-2.27919e-05	1097	0.000195243
1099	-0.0237308	1099	-0.00446181	1099	-0.00166		1098	0.000908034	1098	0.000154174	1098	0.000101285
1100	-0.0236459	1100	-0.00408614	1100	-0.00126		1099	0.000572518	1099	0.00033114	1099	-9.26722e-05
1101	-0.023461	1101	-0.00361048	1101	-0.00106		1100	0.000237003	1100	0.000508105	1100	-0.00038663
1102	-0.0232761	1102	-0.00313481	1102	-0.00115		1101	0.000101488	1101	0.000685071	1101	-0.000780587
1103	-0.0232912	1103	-0.00285914	1103	-0.00155		1102	-3.40277e-05	1102	0.000862037	1102	-0.000974545
1104	-0.0233063	1104	-0.00258348	1104	-0.0022		1103	3.04569e-05	1103	0.001239	1103	-0.000968502
1105	-0.0234213	1105	-0.00240781	1105	-0.00169		1104	-5.05846e-06	1104	0.00141597	1104	-0.00106
1106	-0.0233364	1106	-0.00203214	1106	-0.00139		1105	5.94262e-05	1105	0.00169293	1105	-0.00106
1107	-0.0229515	1107	-0.00135648	1107	-0.00138		1106	-7.60892e-05	1106	0.0020699	1106	-0.00115
1108	-0.0223666	1108	-0.000480811	1108	-0.00148		1107	-0.000211605	1107	0.00234687	1107	-0.00124
1109	-0.0217817	1109	0.000394855	1109	-0.00177		1108	-0.00044712	1108	0.00262383	1108	-0.00134
1110	-0.0209967	1110	0.00083979	1110	-0.00217		1109	-0.000582635	1109	0.0027008	1109	-0.00123
1111	-0.0202118	1111	0.00114553	1111	-0.00256		1110	-0.000518151	1110	0.00257776	1110	-0.00113
1112	-0.0194269	1112	0.00145126	1112	-0.00296		1111	-0.000353666	1111	0.00245473	1111	-0.000920162
1113	-0.018742	1113	0.001657	1113	-0.00335		1112	-0.000189182	1112	0.00223169	1112	-0.00071412
1114	-0.0180571	1114	0.00186273	1114	-0.00394		1113	-0.000124697	1113	0.00200866	1113	-0.000408077
1115	-0.0172721	1115	0.00216847	1115	-0.00493		1114	-6.02123e-05	1114	0.00188562	1114	-2.03469e-06
1116	-0.0163872	1116	0.00257421	1116	-0.00582		1115	0.000104272	1115	0.00176259	1115	0.000404008
1117	-0.0155023	1117	0.00297994	1117	-0.00651		1116	0.000168757	1116	0.00163956	1116	0.00081005
1118	-0.0144174	1118	0.00358568	1118	-0.0072		1117	0.000233242	1117	0.00161652	1117	0.00102
1119	-0.0131325	1119	0.00439141	1119	-0.00779		1118	9.77262e-05	1118	0.00149349	1118	0.00102
1120	-0.0119476	1120	0.00509715	1120	-0.00828		1119	-3.77892e-05	1119	0.00117045	1119	0.00103
1121	-0.0107626	1121	0.00580289	1121	-0.00887		1120	-0.000273305	1120	0.000847419	1120	0.00113
1122	-0.00967772	1122	0.00640862	1122	-0.00936		1121	-0.00050882	1121	0.000424385	1121	0.00134
1123	-0.0086928	1123	0.00691436	1123	-0.00975		1122	-0.000544335	1122	1.35037e-06	1122	0.00145
1124	-0.00770788	1124	0.0074201	1124	-0.00994		1123	-0.000579851	1123	-0.000221684	1123	0.00125
1125	-0.00682296	1125	0.00782583	1125	-0.01013		1124	-0.000615366	1124	-0.000444718	1124	0.00106
1126	-0.00603805	1126	0.00813157	1126	-0.01022		1125	-0.000850881	1125	-0.000667753	1125	0.000664433
1127	-0.00535313	1127	0.0083373	1127	-0.01031		1126	-0.00109	1126	-0.000790787	1126	0.000270475
1128	-0.00476821	1128	0.00844304	1128	-0.0103		1127	-0.00132	1127	-0.00101382	1127	-0.000123482
1129	-0.00438329	1129	0.00834878	1129	-0.01019		1128	-0.00136	1128	-0.00133686	1128	-0.00051744
1130	-0.00399837	1130	0.00825451	1130	-0.00988		1129	-0.00139	1129	-0.00175989	1129	-0.000911397
1131	-0.00371345	1131	0.00806025	1131	-0.00957		1130	-0.00153	1130	-0.00218292	1130	-0.00121
1132	-0.00352853	1132	0.00776598	1132	-0.00916		1131	-0.00166	1131	-0.00250596	1131	-0.0014
1133	-0.00344362	1133	0.00737172	1133	-0.00875		1132	-0.0019	1132	-0.00272899	1132	-0.00149
1134	-0.0033587	1134	0.00697746	1134	-0.00823		1133	-0.00224	1133	-0.00275203	1133	-0.00159
1135	-0.00337378	1135	0.00648319	1135	-0.00792		1134	-0.00247	1134	-0.00257506	1134	-0.00188
1136	-0.00318886	1136	0.00618893	1136	-0.00741		1135	-0.00261	1135	-0.0024981	1135	-0.00238
1137	-0.00300394	1137	0.00589466	1137	-0.0069		1136	-0.00264	1136	-0.00232113	1136	-0.00297
1138	-0.00281902	1138	0.0056004	1138	-0.00619		1137	-0.00288	1137	-0.00214416	1137	-0.00346
1139	-0.0026341	1139	0.00530614	1139	-0.00538		1138	-0.00311	1138	-0.0018672	1138	-0.00366
1140	-0.00254919	1140	0.00491187	1140	-0.00457		1139	-0.00345	1139	-0.00159023	1139	-0.00355
1141	-0.00246427	1141	0.00451761	1141	-0.00376		1140	-0.00378	1140	-0.00131327	1140	-0.00334
1142	-0.00237935	1142	0.00412335	1142	-0.00285		1141	-0.00412	1141	-0.0012363	1141	-0.00324
1143	-0.00219443	1143	0.00382908	1143	-0.00194		1142	-0.00425	1142	-0.00125934	1142	-0.00303
1144	-0.00190951	1144	0.00363482	1144	-0.000831034		1143	-0.00439	1143	-0.00128237	1143	-0.00293
1145	-0.00152459	1145	0.00354055	1145	0.000279354		1144	-0.00453	1144	-0.0012054	1144	-0.00282
1146	-0.00123967	1146	0.00334629	1146	0.00139		1145	-0.00446	1145	-0.00112844	1145	-0.00271
1147	-0.000854756	1147	0.00325203	1147	0.0024		1146	-0.0044	1146	-0.000951473	1146	-0.00261
1148	-0.000569837	1148	0.00305776	1148	0.00351		1147	-0.00423	1147	-0.000974507	1147	-0.0025
1149	-0.000284919	1149	0.0028635	1149	0.00482		1148	-0.00387	1148	-0.000997542	1148	-0.0023
1150	6.25278e-13	1150	0.00266923	1150	0.00633		1149	-0.0034	1149	-0.00112058	1149	-0.00189
1151	0.000557039	1151	0.00247497	1151	0.00745		1150	-0.00304	1150	-0.00114361	1150	-0.00138
1152	0.00121408	1152	0.00238071	1152	0.00856		1151	-0.00277	1151	-0.00126664	1151	-0.000878462
1153	0.00187112	1153	0.00228644	1153	0.00948		1152	-0.00261	1152	-0.00148968	1152	-0.00027242
1154	0.00242816	1154	0.00209218	1154	0.01039		1153	-0.00255	1153	-0.00161271	1153	0.000233623
1155	0.0030852	1155	0.00199791	1155	0.01131		1154	-0.00238	1154	-0.00183575	1154	0.000639665
1156	0.00354224	1156	0.00170365	1156	0.01232		1155	-0.00212	1155	-0.00185878	1155	0.00105
1157	0.00409927	1157	0.00150939	1157	0.01334		1156	-0.00195	1156	-0.00168182	1156	0.00135
1158	0.00465631	1158	0.00131512	1158	0.01425		1157	-0.00189	1157	-0.00150485	1157	0.00166
1159	0.00521335	1159	0.00112086	1159	0.01496		1158	-0.00192	1158	-0.00122788	1158	0.00196
1160	0.00567039	1160	0.000826595	1160	0.01548		1159	-0.00206	1159	-0.00115092	1159	0.00197
1161	0.00602743	1161	0.000432332	1161	0.01559		1160	-0.00219	1160	-0.00107395	1160	0.00188
1162	0.00648447	1162	0.000138068	1162	0.01531		1161	-0.00233	1161	-0.000996988	1161	0.00178
1163	0.00764151	1163	0.00109733	1163	0.01462		1162	-0.00256	1162	-0.000820022	1162	0.00179
1164	0.0105985	1164	0.00403451	1164	0.01384		1163	-0.0028	1163	-0.000743056	1163	0.00179
1165	0.0171556	1165	0.0105717	1165	0.01375		1164	-0.00294	1164	-0.000566091	1164	0.0019
1166	0.0284126	1166	0.0218089	1166	0.01557		1165	-0.00307	1165	-0.000389125	1165	0.00191
1167	0.0447697	1167	0.038146	1167	0.01988		1166	-0.00301	1166	-0.000312159	1166	0.00191
1168	0.0657267	1168	0.0590832	1168	0.0268		1167	-0.00294	1167	-0.000235194	1167	0.00172
1169	0.0902837	1169	0.0836204	1169	0.03601		1168	-0.00278	1168	-5.82279e-05	1168	0.00142
1170	0.117241	1170	0.110558	1170	0.04693		1169	-0.00241	1169	1.87378e-05	1169	0.00113
1171	0.145598	1171	0.138895	1171	0.05894		1170	-0.00215	1170	-4.29654e-06	1170	0.000736345
1172	0.174655	1172	0.167932	1172	0.07176		1171	-0.00168	1171	-2.73309e-05	1171	0.000342388
1173	0.204012	1173	0.197269	1173	0.08497		1172	-0.00132	1172	-5.03652e-05	1172	-5.15697e-05
1174	0.233269	1174	0.226506	1174	0.09859		1173	-0.00085562	1173	2.66005e-05	1173	-0.000445527
1175	0.262326	1175	0.255543	1175	0.1124		1174	-0.000391135	1174	0.000203566	1174	-0.000639485
1176	0.290783	1176	0.283981	1176	0.12632		1175	-2.66505e-05	1175	0.000380532	1175	-0.000733442
1177	0.31804	1177	0.311218	1177	0.14043		1176	0.000337834	1176	0.000557498	1176	-0.0007274
1178	0.343397	1178	0.336555	1178	0.15425		1177	0.000702319	1177	0.000634463	1177	-0.000721357
1179	0.365254	1179	0.358392	1179	0.16726		1178	0.00107	1178	0.000711429	1178	-0.000615315
1180	0.381911	1180	0.375029	1180	0.17838		1179	0.00143	1179	0.000588395	1179	-0.000709272
1181	0.392068	1181	0.385166	1181	0.18689		1180	0.002	1180	0.00056536	1180	-0.00070323
1182	0.395425	1182	0.388504	1182	0.19191		1181	0.00246	1181	0.000642326	1181	-0.000797187
1183	0.392682	1183	0.385741	1183	0.19362		1182	0.00272	1182	0.000719292	1182	-0.000791145
1184	0.385139	1184	0.378178	1184	0.19214		1183	0.00289	1183	0.000896257	1183	-0.000785102
1185	0.373796	1185	0.366815	1185	0.18815		1184	0.00285	1184	0.00107322	1184	-0.00067906
1186	0.359953	1186	0.352952	1186	0.18207		1185	0.00282	1185	0.00115019	1185	-0.000573017
1187	0.34421	1187	0.33719	1187	0.17458		1186	0.00268	1186	0.00122715	1186	-0.000566975
1188	0.327167	1188	0.320127	1188	0.1659		1187	0.00255	1187	0.00130412	1187	-0.000560932
1189	0.309225	1189	0.302164	1189	0.15661		1188	0.00241	1188	0.00138109	1188	-0.00055489
1190	0.290682	1190	0.283601	1190	0.14683		1189	0.00228	1189	0.00145805	1189	-0.000448847
1191	0.271939	1191	0.264838	1191	0.13704		1190	0.00214	1190	0.00153502	1190	-0.000342805
1192	0.253396	1192	0.246275	1192	0.12735		1191	0.00221	1191	0.00141198	1191	-0.000236762
1193	0.235553	1193	0.228413	1193	0.11817		1192	0.00217	1192	0.00138895	1192	-0.00043072
1194	0.21861	1194	0.21145	1194	0.10958		1193	0.00213	1193	0.00126591	1193	-0.000624677
1195	0.202767	1195	0.195587	1195	0.1016		1194	0.002	1194	0.00134288	1194	-0.000918635
1196	0.188024	1196	0.180824	1196	0.09441		1195	0.00186	1195	0.00121985	1195	-0.00101
1197	0.174281	1197	0.167061	1197	0.08793		1196	0.00183	1196	0.00109681	1196	-0.00090655
1198	0.161538	1198	0.154298	1198	0.08214		1197	0.00199	1197	0.000973777	1197	-0.000600507
1199	0.149795	1199	0.142536	1199	0.07716		1198	0.00216	1198	0.000750743	1198	-0.000294465
1200	0.138952	1200	0.131673	1200	0.07297		1199	0.00242	1199	0.000627708	1199	1.15778e-05
1201	0.129009	1201	0.12171	1201	0.06949		1200	0.00259	1200	0.000704674	1200	0.00021762
1202	0.119866	1202	0.112547	1202	0.0666		1201	0.00275	1201	0.000661188	1201	0.000442138
1203	0.111323	1203	0.103984	1203	0.06422		1202	0.00291	1202	0.000617702	1202	0.000666656
1204	0.10338	1204	0.0960215	1204	0.06213		1203	0.00298	1203	0.000674216	1203	0.000791174
1205	0.0958372	1205	0.0884587	1205	0.06025		1204	0.00314	1204	0.00073073	1204	0.000715692
1206	0.0886942	1206	0.0812959	1206	0.05846		1205	0.00331	1205	0.000787244	1205	0.00064021
1207	0.0819512	1207	0.0745331	1207	0.05678		1206	0.00337	1206	0.000743758	1206	0.000464728
1208	0.0754083	1208	0.0679703	1208	0.05509		1207	0.00344	1207	0.000700272	1207	0.000289246
1209	0.0693653	1209	0.0619074	1209	0.05331		1208	0.0034	1208	0.000656786	1208	0.000313764
1210	0.0636224	1210	0.0561446	1210	0.05152		1209	0.00313	1209	0.0007133	1209	0.000338282
1211	0.0582794	1211	0.0507818	1211	0.04974		1210	0.00307	1210	0.00116981	1210	0.0005628
1212	0.0533364	1212	0.045819	1212	0.04785		1211	0.0051	1211	0.00382633	1211	0.00249
1213	0.0484935	1213	0.0409561	1213	0.04577		1212	0.01353	1212	0.0125828	1212	0.00921
1214	0.0437505	1214	0.0361933	1214	0.04368		1213	0.03456	1213	0.0331394	1213	0.02544
1215	0.0391076	1215	0.0315305	1215	0.0415		1214	0.0736	1214	0.0707959	1214	0.05466
1216	0.0347646	1216	0.0271677	1216	0.03931		1215	0.13343	1215	0.127852	1215	0.09809
1217	0.0308216	1217	0.0232048	1217	0.03723		1216	0.21316	1216	0.203709	1216	0.15421
1218	0.0270787	1218	0.019442	1218	0.03514		1217	0.30929	1217	0.294765	1217	0.21953
1219	0.0236357	1219	0.0159792	1219	0.03306		1218	0.41713	1218	0.396722	1218	0.29046
1220	0.0204927	1220	0.0134025	1220	0.03097		1219	0.53236	1219	0.505878	1219	0.36398
1221	0.0174498	1221	0.0111354	1221	0.02889		1220	0.65209	1220	0.619235	1220	0.43871
1222	0.0147068	1222	0.00916827	1222	0.0269		1221	0.77412	1221	0.735091	1221	0.51343
1223	0.0121639	1223	0.00740114	1223	0.02492		1222	0.89696	1222	0.851948	1222	0.58756
1224	0.0098209	1224	0.00583401	1224	0.02313		1223	1.01909	1223	0.968204	1223	0.66018
1225	0.00767794	1225	0.00446688	1225	0.02144		1224	1.13912	1224	1.08236	1224	0.73041
1226	0.00563498	1226	0.00319975	1226	0.01976		1225	1.25525	1225	1.19252	1225	0.79703
1227	0.00379202	1227	0.00213262	1227	0.01807		1226	1.36449	1226	1.29617	1226	0.85816
1228	0.00224906	1228	0.0013655	1228	0.01649		1227	1.46192	1227	1.38823	1227	0.91018
1229	0.0010061	1229	0.000898367	1229	0.0149		1228	1.54105	1228	1.46299	1228	0.9487
1230	-0.000383191	1230	0.00072036	1230	0.01322		1229	1.59658	1229	1.51484	1229	0.97043
1231	-0.00172833	1231	0.000656725	1231	0.01153		1230	1.62562	1230	1.5415	1230	0.97415
1232	-0.00317347	1232	0.00049309	1232	0.00985		1231	1.62915	1231	1.54386	1231	0.96178
1233	-0.00471861	1233	0.000229456	1233	0.00826		1232	1.61078	1232	1.52541	1232	0.9367
1234	-0.00626375	1234	-3.41794e-05	1234	0.00678		1233	1.57542	1233	1.49057	1233	0.90273
1235	-0.00760889	1235	-9.78143e-05	1235	0.00529		1234	1.52725	1234	1.44353	1234	0.86285
1236	-0.00875403	1236	3.85507e-05	1236	0.00401		1235	1.46988	1235	1.38728	1235	0.81908
1237	-0.00969917	1237	0.000374916	1237	0.00262		1236	1.40561	1236	1.32414	1236	0.7726
1238	-0.0106443	1238	0.000711281	1238	0.00144		1237	1.33625	1237	1.2559	1237	0.72452
1239	-0.0113895	1239	0.00124765	1239	0.000152855		1238	1.26358	1238	1.18425	1238	0.67565
1240	-0.0122346	1240	0.00168401	1240	-0.000932296		1239	1.18931	1239	1.11091	1239	0.62727
1241	-0.0130797	1241	0.00212038	1241	-0.00192		1240	1.11514	1240	1.03777	1240	0.5802
1242	-0.0140249	1242	0.00245674	1242	-0.0027		1241	1.04238	1241	0.966122	1241	0.53522
1243	-0.01507	1243	0.00269311	1243	-0.00349		1242	0.97201	1242	0.896878	1242	0.49255
1244	-0.0162152	1244	0.00282947	1244	-0.00417		1243	0.90464	1243	0.830635	1243	0.45257
1245	-0.0173603	1245	0.00296584	1245	-0.00486		1244	0.84037	1244	0.767791	1244	0.4151
1246	-0.0184054	1246	0.0032022	1246	-0.00534		1245	0.77951	1245	0.708348	1245	0.38012
1247	-0.0194506	1247	0.00343857	1247	-0.00573		1246	0.72204	1246	0.652504	1246	0.34775
1248	-0.0204957	1248	0.00367493	1248	-0.00591		1247	0.66817	1247	0.600361	1247	0.31787
1249	-0.0214409	1249	0.0040113	1249	-0.006		1248	0.6177	1248	0.552117	1248	0.29049
1250	-0.022386	1250	0.00434766	1250	-0.00647		1249	0.57074	1249	0.507674	1249	0.26532
1251	-0.0232311	1251	0.00478403	1251	-0.00705		1250	0.52697	1250	0.46693	1250	0.24234
1252	-0.0239763	1252	0.00423422	1252	-0.00743		1251	0.4863	1251	0.429587	1251	0.22117
1253	-0.0246214	1253	0.00339692	1253	-0.0078		1252	0.44853	1252	0.395343	1252	0.20169
1254	-0.0252666	1254	0.00255962	1254	-0.00788		1253	0.41347	1253	0.3639	1253	0.18372
1255	-0.0260117	1255	0.00162231	1255	-0.00775		1254	0.3812	1254	0.335056	1254	0.16704
1256	-0.0266568	1256	0.00078501	1256	-0.00753		1255	0.35143	1255	0.308513	1255	0.15167
1257	-0.027102	1257	0.000147707	1257	-0.00721		1256	0.32386	1256	0.284369	1256	0.13749
1258	-0.0274471	1258	-0.000389595	1258	-0.00678		1257	0.2984	1257	0.262326	1257	0.12452
1259	-0.0276923	1259	-0.000826898	1259	-0.00636		1258	0.27473	1258	0.242282	1258	0.11244
1260	-0.0277374	1260	-0.0010642	1260	-0.00593		1259	0.25296	1259	0.224039	1259	0.10116
1261	-0.0278825	1261	-0.0014015	1261	-0.00551		1260	0.23299	1260	0.207296	1260	0.09059
1262	-0.0279277	1262	-0.00163881	1262	-0.00499		1261	0.21463	1261	0.192052	1261	0.08071
1263	-0.0278728	1263	-0.00177611	1263	-0.00456		1262	0.19786	1262	0.178209	1262	0.07164
1264	-0.027718	1264	-0.00181341	1264	-0.00394		1263	0.18239	1263	0.165565	1263	0.06336
1265	-0.0275631	1265	-0.00185071	1265	-0.00328		1264	0.16832	1264	0.153922	1264	0.05579
1266	-0.0272082	1266	-0.00168802	1266	-0.00141		1265	0.15546	1265	0.143078	1265	0.04891
1267	-0.0268534	1267	-0.00152532	1267	0.000357709		1266	0.14369	1266	0.133035	1266	0.04264
1268	-0.0265985	1268	-0.00146262	1268	0.00212		1267	0.13292	1267	0.123891	1267	0.03676
1269	-0.0263437	1269	-0.00139992	1269	0.00359		1268	0.12305	1268	0.115748	1268	0.03128
1270	-0.0260888	1270	-0.00133723	1270	0.00496		1269	0.11389	1269	0.108304	1269	0.02621
1271	-0.0258339	1271	-0.00127453	1271	0.00613		1270	0.10542	1270	0.101661	1270	0.02173
1272	-0.0253791	1272	-0.00101183	1272	0.00709		1271	0.09775	1271	0.0956172	1271	0.01776
1273	-0.0248242	1273	-0.000649134	1273	0.00786		1272	0.09088	1272	0.0901737	1272	0.01428
1274	-0.0242694	1274	-0.000286436	1274	0.00853		1273	0.08472	1273	0.0851302	1273	0.01141
1275	-0.0237145	1275	7.6261e-05	1275	0.0091		1274	0.07925	1274	0.0805867	1274	0.00883
1276	-0.0231596	1276	0.000438958	1276	0.00946		1275	0.07428	1275	0.0765432	1275	0.00666
1277	-0.0223048	1277	0.00110166	1277	0.00953		1276	0.06971	1276	0.0728997	1276	0.00478
1278	-0.0213499	1278	0.00186435	1278	0.0092		1277	0.06555	1277	0.0695562	1277	0.00321
1279	-0.0203951	1279	0.00262705	1279	0.00876		1278	0.06178	1278	0.0665128	1278	0.00173
1280	-0.0194402	1280	0.00338975	1280	0.00803		1279	0.05851	1279	0.0636693	1279	0.000454538
1281	-0.0186853	1281	0.00395245	1281	0.0072		1280	0.05564	1280	0.0612258	1280	-0.000720944
1282	-0.0180305	1282	0.00441514	1282	0.00627		1281	0.05318	1281	0.0588823	1281	-0.0018
1283	-0.0172756	1283	0.00497784	1283	0.00513		1282	0.05101	1282	0.0568388	1282	-0.00257
1284	-0.0164208	1284	0.00564054	1284	0.004		1283	0.04924	1283	0.0548953	1283	-0.00315
1285	-0.0154659	1285	0.00640324	1285	0.00287		1284	0.04787	1284	0.0531518	1284	-0.00342
1286	-0.014611	1286	0.00706593	1286	0.00173		1285	0.04681	1285	0.0518084	1285	-0.0037
1287	-0.0137562	1287	0.00772863	1287	0.000802154		1286	0.04584	1286	0.0506649	1286	-0.00387
1288	-0.0130013	1288	0.00829133	1288	-0.000130624		1287	0.04497	1287	0.0495214	1287	-0.00405
1289	-0.0124465	1289	0.00865402	1289	-0.000963402		1288	0.04401	1288	0.0484779	1288	-0.00422
1290	-0.0119916	1290	0.00891672	1290	-0.0018		1289	0.04284	1289	0.0475344	1289	-0.0043
1291	-0.0115367	1291	0.00917942	1291	-0.00263		1290	0.04177	1290	0.0465909	1290	-0.00438
1292	-0.0112819	1292	0.00924212	1292	-0.00316		1291	0.0406	1291	0.0456474	1291	-0.00418
1293	-0.011027	1293	0.00930481	1293	-0.00349		1292	0.03954	1292	0.044704	1292	-0.00397
1294	-0.0109722	1294	0.00916751	1294	-0.00373		1293	0.03867	1293	0.0436605	1293	-0.00387
1295	-0.0111173	1295	0.00883021	1295	-0.00376		1294	0.0378	1294	0.042517	1294	-0.00367
1296	-0.0112624	1296	0.00849291	1296	-0.00379		1295	0.03693	1295	0.0413735	1295	-0.00337
1297	-0.0114076	1297	0.0081556	1297	-0.00353		1296	0.03627	1296	0.04033	1296	-0.00297
1298	-0.0116527	1298	0.0077183	1298	-0.00316		1297	0.0355	1297	0.0392865	1297	-0.00257
1299	-0.0117979	1299	0.007381	1299	-0.00249		1298	0.03483	1298	0.038443	1298	-0.00207
1300	-0.012043	1300	0.0069437	1300	-0.00172		1299	0.03396	1299	0.0375996	1299	-0.00167
1301	-0.0121881	1301	0.00660639	1301	-0.00168		1300	0.0331	1300	0.0367561	1300	-0.00127
1302	-0.0124333	1302	0.00616909	1302	-0.00166		1301	0.03233	1301	0.0358126	1301	-0.000868052
1303	-0.0125784	1303	0.00583179	1303	-0.00155		1302	0.03176	1302	0.0348691	1302	-0.000467351
1304	-0.0127236	1304	0.00549449	1304	-0.00133		1303	0.03119	1303	0.0341256	1303	-6.66495e-05
1305	-0.0126687	1305	0.00535718	1305	-0.00091834		1304	0.03083	1304	0.0334821	1304	0.000434052
1306	-0.0126138	1306	0.00521988	1306	-0.000303519		1305	0.03056	1305	0.0327386	1305	0.000934753
1307	-0.012659	1307	0.00498258	1307	0.000611302		1306	0.03049	1306	0.0321952	1306	0.00124
1308	-0.0127041	1308	0.00474528	1308	0.00173		1307	0.03042	1307	0.0316517	1307	0.00154
1309	-0.0126493	1309	0.00460797	1309	0.00274		1308	0.03026	1308	0.0312082	1308	0.00184
1310	-0.0123944	1310	0.00467067	1310	0.00376		1309	0.02999	1309	0.0309647	1309	0.00224
1311	-0.0121395	1311	0.00473337	1311	0.00487		1310	0.02962	1310	0.0308212	1310	0.00244
1312	-0.0117847	1312	0.00489607	1312	0.00609		1311	0.02905	1311	0.0306777	1311	0.00264
1313	-0.0113298	1313	0.00515876	1313	0.0072		1312	0.02839	1312	0.0305342	1312	0.00274
1314	-0.010775	1314	0.00552146	1314	0.00842		1313	0.02782	1313	0.0302908	1313	0.00284
1315	-0.0102201	1315	0.00588416	1315	0.00973		1314	0.02725	1314	0.0300473	1314	0.00294
1316	-0.00976524	1316	0.00614686	1316	0.01094		1315	0.02668	1315	0.0298038	1315	0.00314
1317	-0.00951038	1317	0.00620955	1317	0.01206		1316	0.02612	1316	0.0295603	1316	0.00324
1318	-0.00915552	1318	0.00637225	1318	0.01317		1317	0.02535	1317	0.0292168	1317	0.00324
1319	-0.00890066	1319	0.00643495	1319	0.01419		1318	0.02468	1318	0.0288733	1318	0.00314
1320	-0.0085458	1320	0.00659765	1320	0.015		1319	0.02391	1319	0.0285298	1319	0.00304
1321	-0.00829094	1321	0.00666034	1321	0.01552		1320	0.02305	1320	0.0280863	1320	0.00295
1322	-0.00783608	1322	0.00692304	1322	0.01573		1321	0.02198	1321	0.0276429	1321	0.00285
1323	-0.00738122	1323	0.00718574	1323	0.01575		1322	0.02081	1322	0.0272994	1322	0.00265
1324	-0.00682636	1324	0.00754843	1324	0.01556		1323	0.01984	1323	0.0268559	1323	0.00245
1325	-0.0061715	1325	0.00801113	1325	0.01528		1324	0.01898	1324	0.0265124	1324	0.00235
1326	-0.00561664	1326	0.00837383	1326	0.01499		1325	0.01831	1325	0.0261689	1325	0.00225
1327	-0.00516178	1327	0.00863653	1327	0.01481		1326	0.01784	1326	0.0258254	1326	0.00235
1328	-0.00480692	1328	0.00879922	1328	0.01452		1327	0.01737	1327	0.0253819	1327	0.00245
1329	-0.00455206	1329	0.00886192	1329	0.01404		1328	0.01681	1328	0.0248385	1328	0.00245
1330	-0.0042972	1330	0.00892462	1330	0.01335		1329	0.01614	1329	0.024295	1329	0.00235
1331	-0.00394234	1331	0.00908732	1331	0.01247		1330	0.01547	1330	0.0237515	1330	0.00215
1332	-0.00358748	1332	0.00925001	1332	0.01148		1331	0.0148	1331	0.023208	1331	0.00195
1333	-0.00313262	1333	0.00951271	1333	0.0104		1332	0.01424	1332	0.0227645	1332	0.00185
1334	-0.00277776	1334	0.00967541	1334	0.00931		1333	0.01377	1333	0.022421	1333	0.00185
1335	-0.0023229	1335	0.00993811	1335	0.00833		1334	0.0133	1334	0.0221775	1334	0.00196
1336	-0.00176804	1336	0.0103008	1336	0.00734		1335	0.01283	1335	0.0218341	1335	0.00206
1337	-0.00121318	1337	0.0106635	1337	0.00626		1336	0.01247	1336	0.0214906	1336	0.00216
1338	-0.000858319	1338	0.0108262	1338	0.00537		1337	0.0122	1337	0.0212471	1337	0.00226
1339	-0.000603459	1339	0.0108889	1339	0.00449		1338	0.01183	1338	0.0210036	1338	0.00236
1340	-0.000548599	1340	0.0107516	1340	0.0036		1339	0.01147	1339	0.0206601	1339	0.00236
1341	-0.000493739	1341	0.0106143	1341	0.00282		1340	0.0109	1340	0.0203166	1340	0.00236
1342	-0.000438879	1342	0.010477	1342	0.00193		1341	0.01033	1341	0.0200731	1341	0.00216
1343	-0.000384019	1343	0.0103397	1343	0.00104		1342	0.00966	1342	0.0198297	1342	0.00196
1344	-0.00032916	1344	0.0102024	1344	0.000159675		1343	0.0091	1343	0.0197862	1343	0.00176
1345	-0.0002743	1345	0.0100651	1345	-0.000625504		1344	0.00853	1344	0.0197427	1344	0.00176
1346	-0.00011944	1346	0.0100278	1346	-0.00121		1345	0.00806	1345	0.0197992	1345	0.00176
1347	3.54202e-05	1347	0.00999048	1347	-0.0015		1346	0.00749	1346	0.0195557	1346	0.00176
1348	0.00019028	1348	0.00995317	1348	-0.00158		1347	0.00703	1347	0.0193122	1347	0.00166
1349	0.00014514	1349	0.00971587	1349	-0.00147		1348	0.00656	1348	0.0188687	1348	0.00156
1350	-2.84217e-14	1350	0.00937857	1350	-0.00145		1349	0.00619	1349	0.0184253	1349	0.00157
1351	0.0001152	1351	0.00884127	1351	-0.00142		1350	0.00592	1350	0.0180818	1350	0.00147
1352	0.000130401	1352	0.00820396	1352	-0.0013		1351	0.00556	1351	0.0178383	1351	0.00137
1353	0.000145601	1353	0.00756666	1353	-0.00086737		1352	0.00499	1352	0.0176948	1352	0.00117
1354	0.000160801	1354	0.00692936	1354	-0.00043936		1353	0.00432	1353	0.0174513	1353	0.000868407
1355	0.000176001	1355	0.00629205	1355	-1.13506e-05		1354	0.00375	1354	0.0172078	1354	0.000669108
1356	0.000291202	1356	0.00575475	1356	0.000316659		1355	0.00339	1355	0.0169643	1355	0.000469809
1357	0.000306402	1357	0.00511745	1357	0.000644669		1356	0.00322	1356	0.0167208	1356	0.00037051
1358	0.000221602	1358	0.00438015	1358	0.000972679		1357	0.00305	1357	0.0164774	1357	0.000271211
1359	-6.31975e-05	1359	0.00344284	1359	0.0012		1358	0.00298	1358	0.0161339	1358	0.000171912
1360	-0.000347997	1360	0.00250554	1360	0.00143		1359	0.00309	1359	0.0157904	1359	7.26136e-05
1361	-0.0010328	1361	0.00116824	1361	0.00136		1360	0.0032	1360	0.0154469	1360	-2.66853e-05
1362	-0.0017176	1362	-0.000169063	1362	0.000684717		1361	0.00341	1361	0.0152034	1361	0.000174016
1363	-0.0021024	1363	-0.000451485	1363	-0.000487273		1362	0.00352	1362	0.0149599	1362	0.000274717
1364	-0.000887196	1364	0.00109528	1364	-0.00122		1363	0.00363	1363	0.0148164	1363	0.000475418
1365	0.003528	1365	0.00584204	1365	-0.00101		1364	0.00374	1364	0.014673	1364	0.000576119
1366	0.0122432	1366	0.0148888	1366	0.000893147		1365	0.00374	1365	0.0146295	1365	0.00067682
1367	0.0260584	1367	0.0290356	1367	0.0052		1366	0.00375	1366	0.014386	1366	0.000777522
1368	0.0442736	1368	0.0475823	1368	0.0121		1367	0.00396	1367	0.0139425	1367	0.000978223
1369	0.0661888	1369	0.0698291	1369	0.02161		1368	0.00427	1368	0.013499	1368	0.00118
1370	0.090304	1370	0.0942758	1370	0.03321		1369	0.00458	1369	0.0128555	1369	0.00148
1371	0.115819	1371	0.120123	1371	0.04611		1370	0.00469	1370	0.012412	1370	0.00158
1372	0.142234	1372	0.146869	1372	0.06002		1371	0.0047	1371	0.0118686	1371	0.00158
1373	0.16905	1373	0.174016	1373	0.07442		1372	0.0046	1372	0.0112251	1372	0.00158
1374	0.195865	1374	0.201163	1374	0.08923		1373	0.00431	1373	0.0105816	1373	0.00168
1375	0.22248	1375	0.22811	1375	0.10423		1374	0.00402	1374	0.0100381	1374	0.00178
1376	0.248495	1376	0.254456	1376	0.11933		1375	0.00383	1375	0.00959461	1375	0.00188
1377	0.27351	1377	0.279803	1377	0.13434		1376	0.00374	1376	0.00925113	1376	0.00178
1378	0.297026	1378	0.30365	1378	0.14904		1377	0.00365	1377	0.00910764	1377	0.00169
1379	0.317441	1379	0.324397	1379	0.16295		1378	0.00346	1378	0.00896416	1378	0.00159
1380	0.333356	1380	0.340643	1380	0.17515		1379	0.00306	1379	0.00872067	1379	0.00159
1381	0.343371	1381	0.35099	1381	0.18476		1380	0.00277	1380	0.00837718	1380	0.00159
1382	0.346986	1382	0.354937	1382	0.19116		1381	0.00248	1381	0.0081337	1381	0.00149
1383	0.344702	1383	0.352984	1383	0.19386		1382	0.00229	1382	0.00799021	1382	0.00139
1384	0.337617	1384	0.34623	1384	0.19317		1383	0.002	1383	0.00784673	1383	0.00129
1385	0.326832	1385	0.335777	1385	0.18967		1384	0.00151	1384	0.00770324	1384	0.00109
1386	0.313447	1386	0.322724	1386	0.18378		1385	0.000815424	1385	0.00755975	1385	0.000890843
1387	0.297962	1387	0.307571	1387	0.17638		1386	0.000124015	1386	0.00741627	1386	0.000691544
1388	0.281178	1388	0.291118	1388	0.16768		1387	-0.000367395	1387	0.00727278	1387	0.000592245
1389	0.263393	1389	0.273664	1389	0.15819		1388	-0.000858805	1388	0.0071293	1388	0.000392946
1390	0.245008	1390	0.255565	1390	0.14809		1389	-0.00115	1389	0.00688581	1389	-6.35256e-06
1391	0.226623	1391	0.23694	1391	0.1375		1390	-0.00154	1390	0.00644232	1390	-0.000505651
1392	0.208438	1392	0.218515	1392	0.1269		1391	-0.00203	1391	0.00569884	1391	-0.0011
1393	0.190954	1393	0.20079	1393	0.1165		1392	-0.00262	1392	0.00485535	1392	-0.0017
1394	0.174369	1394	0.183966	1394	0.10671		1393	-0.00292	1393	0.00401187	1393	-0.0022
1395	0.158684	1395	0.168041	1395	0.09741		1394	-0.00301	1394	0.00336838	1394	-0.0027
1396	0.144099	1396	0.153216	1396	0.08862		1395	-0.0029	1395	0.00292489	1395	-0.0032
1397	0.130414	1397	0.139291	1397	0.08042		1396	-0.00289	1396	0.00248141	1396	-0.0035
1398	0.11783	1398	0.126467	1398	0.07283		1397	-0.00278	1397	0.00213792	1397	-0.0038
1399	0.106145	1399	0.114542	1399	0.06593		1398	-0.00267	1398	0.00179444	1398	-0.004
1400	0.09546	1400	0.103617	1400	0.05953		1399	-0.00246	1399	0.00145095	1399	-0.0041
1401	0.0858752	1401	0.0937925	1401	0.05374		1400	-0.00196	1400	0.00120746	1400	-0.0042
1402	0.0771904	1402	0.0848677	1402	0.04854		1401	-0.00145	1401	0.000863977	1401	-0.0041
1403	0.0694056	1403	0.076843	1403	0.04385		1402	-0.00093854	1402	0.000620491	1402	-0.0038
1404	0.0624208	1404	0.0696182	1404	0.03955		1403	-0.000629949	1403	0.000277005	1403	-0.0035
1405	0.056136	1405	0.0630935	1405	0.03555		1404	-0.000421359	1404	-6.64808e-05	1404	-0.0031
1406	0.0503512	1406	0.0570687	1406	0.03206		1405	-0.000212769	1405	-0.000209967	1405	-0.0027
1407	0.0450664	1407	0.051544	1407	0.02896		1406	9.58216e-05	1406	-0.000353453	1406	-0.00249
1408	0.0402816	1408	0.0465192	1408	0.02627		1407	0.000404412	1407	-0.000496939	1407	-0.00229
1409	0.0357968	1409	0.0417945	1409	0.02397		1408	0.000513002	1408	-0.000740425	1408	-0.00229
1410	0.031612	1410	0.0373697	1410	0.02197		1409	0.000521593	1409	-0.000983911	1409	-0.00229
1411	0.0278272	1411	0.033345	1411	0.02018		1410	0.000330183	1410	-0.0011274	1410	-0.00239
1412	0.0242424	1412	0.0295202	1412	0.01858		1411	0.000138773	1411	-0.00127088	1411	-0.00249
1413	0.0209576	1413	0.0259955	1413	0.01719		1412	-0.000152636	1412	-0.00131437	1412	-0.00259
1414	0.0179728	1414	0.0227707	1414	0.01599		1413	-0.000444046	1413	-0.00135786	1413	-0.00259
1415	0.015188	1415	0.019746	1415	0.0151		1414	-0.000735456	1414	-0.00150134	1414	-0.00269
1416	0.0127032	1416	0.0170212	1416	0.0145		1415	-0.00103	1415	-0.00164483	1415	-0.00279
1417	0.0103184	1417	0.0143965	1417	0.014		1416	-0.00132	1416	-0.00178831	1416	-0.00299
1418	0.00813362	1418	0.0119717	1418	0.01351		1417	-0.00151	1417	-0.0017318	1417	-0.00339
1419	0.00624882	1419	0.00984696	1419	0.01311		1418	-0.0016	1418	-0.00138964	1418	-0.00389
1420	0.00456402	1420	0.00792221	1420	0.01272		1419	-0.00179	1419	-0.00104748	1419	-0.00429
1421	0.00317922	1421	0.00629746	1421	0.01262		1420	-0.00208	1420	-0.000705319	1420	-0.00458
1422	0.00209442	1422	0.00497271	1422	0.01272		1421	-0.00228	1421	-0.000463159	1421	-0.00478
1423	0.00100962	1423	0.00364796	1423	0.01283		1422	-0.00257	1422	-0.000220998	1422	-0.00488
1424	0.000224821	1424	0.00262321	1424	0.01303		1423	-0.00276	1423	-7.88383e-05	1423	-0.00488
1425	-0.000559979	1425	0.00159846	1425	0.01304		1424	-0.00305	1424	6.33219e-05	1424	-0.00498
1426	-0.000944779	1426	0.00097371	1426	0.01304		1425	-0.00324	1425	0.000105482	1425	-0.00508
1427	-0.00102958	1427	0.000648959	1427	0.01285		1426	-0.00343	1426	0.000147642	1426	-0.00518
1428	-0.000714378	1428	0.000724209	1428	0.01275		1427	-0.00352	1427	8.98025e-05	1427	-0.00518
1429	-0.000299178	1429	0.000899458	1429	0.01245		1428	-0.00372	1428	3.19627e-05	1428	-0.00528
1430	0.000216022	1430	0.00117471	1430	0.01216		1429	-0.00381	1429	7.41229e-05	1429	-0.00538
1431	0.000731223	1431	0.00144996	1431	0.01186		1430	-0.0039	1430	0.000216283	1430	-0.00558
1432	0.00134642	1432	0.00182521	1432	0.01167		1431	-0.00399	1431	0.000358443	1431	-0.00578
1433	0.00196162	1433	0.00220046	1433	0.01167		1432	-0.00408	1432	0.000300603	1432	-0.00578
1434	0.00267599	1434	0.00267376	1434	0.01177		1433	-0.00427	1433	4.27637e-05	1433	-0.00578
1435	0.00301333	1435	0.00253246	1435	0.01178		1434	-0.00436	1434	-0.000215076	1434	-0.00557
1436	0.00345067	1436	0.00249116	1436	0.01158		1435	-0.00436	1435	-0.000272916	1435	-0.00527
1437	0.003988	1437	0.00254986	1437	0.01129		1436	-0.00415	1436	-0.000330756	1436	-0.00487
1438	0.00452534	1438	0.00260855	1438	0.01089		1437	-0.00374	1437	-0.000188596	1437	-0.00447
1439	0.00516267	1439	0.00276725	1439	0.01059		1438	-0.00333	1438	5.35647e-05	1438	-0.00397
1440	0.00570001	1440	0.00282595	1440	0.0103		1439	-0.00292	1439	0.000195725	1439	-0.00347
1441	0.00603735	1441	0.00268464	1441	0.0099		1440	-0.00261	1440	0.000337885	1440	-0.00297
1442	0.00637468	1442	0.00254334	1442	0.00941		1441	-0.0023	1441	0.000380045	1441	-0.00277
1443	0.00651202	1443	0.00220204	1443	0.00891		1442	-0.00219	1442	0.000622205	1442	-0.00257
1444	0.00664935	1444	0.00186073	1444	0.00842		1443	-0.00199	1443	0.000864366	1443	-0.00247
1445	0.00668669	1445	0.00141943	1445	0.00792		1444	-0.00198	1444	0.00100653	1444	-0.00217
1446	0.00682402	1446	0.00107813	1446	0.00742		1445	-0.00207	1445	0.000948686	1445	-0.00187
1447	0.00696136	1447	0.000736825	1447	0.00673		1446	-0.00236	1446	0.000790846	1446	-0.00147
1448	0.0072987	1448	0.000595522	1448	0.00583		1447	-0.00255	1447	0.000533006	1447	-0.000965687
1449	0.00773603	1449	0.000554219	1449	0.00484		1448	-0.00274	1448	0.000475167	1448	-0.000564986
1450	0.00817337	1450	0.000512916	1450	0.00394		1449	-0.00303	1449	0.000517327	1449	-0.000264285
1451	0.0085107	1451	0.000371613	1451	0.00324		1450	-0.00343	1450	0.000759487	1450	-0.000163584
1452	0.00884804	1452	0.00023031	1452	0.00255		1451	-0.00392	1451	0.00100165	1451	-6.28827e-05
1453	0.00928538	1453	0.000189007	1453	0.00195		1452	-0.00461	1452	0.00114381	1452	-0.000162182
1454	0.00992271	1454	0.000347704	1454	0.00126		1453	-0.0052	1453	0.00108597	1453	-0.00016148
1455	0.01066	1455	0.000606401	1455	0.000644545		1454	-0.00559	1454	0.000928128	1454	-0.000260779
1456	0.0112974	1456	0.000765098	1456	-0.000506636		1455	-0.00588	1455	0.000670288	1455	-0.000260078
1457	0.0119347	1457	0.000923795	1457	-0.00146		1456	-0.00607	1456	0.000412448	1456	-0.000159377
1458	0.0126721	1458	0.00118249	1458	-0.00211		1457	-0.00627	1457	0.000154608	1457	4.13241e-05
1459	0.0133094	1459	0.00134119	1459	-0.00266		1458	-0.00646	1458	-3.23133e-06	1458	0.000242025
1460	0.0140467	1460	0.00159989	1460	-0.00321		1459	-0.00665	1459	-0.000161071	1459	0.000442726
1461	0.0147841	1461	0.00185858	1461	-0.00366		1460	-0.00654	1460	-0.000118911	1460	0.000543427
1462	0.0154214	1462	0.00201728	1462	-0.00401		1461	-0.00633	1461	-7.67507e-05	1461	0.000544129
1463	0.0160587	1463	0.00217598	1463	-0.00406		1462	-0.00592	1462	6.54095e-05	1462	0.00064483
1464	0.0166961	1464	0.00233467	1464	-0.00392		1463	-0.00551	1463	0.00020757	1463	0.000645531
1465	0.0173334	1465	0.00249337	1465	-0.00377		1464	-0.00481	1464	0.00024973	1464	0.000846232
1466	0.0178707	1466	0.00255207	1466	-0.00362		1465	-0.0041	1465	0.00029189	1465	0.00115
1467	0.0182081	1467	0.00241077	1467	-0.00337		1466	-0.00329	1466	0.00013405	1466	0.00145
1468	0.0183454	1468	0.00206946	1468	-0.00312		1467	-0.00238	1467	-0.00012379	1467	0.00165
1469	0.0182827	1469	0.00152816	1469	-0.00287		1468	-0.00157	1468	-0.000281629	1468	0.00185
1470	0.0182201	1470	0.000986856	1470	-0.00242		1469	-0.000962986	1469	-0.000439469	1469	0.00205
1471	0.0182574	1471	0.000699242	1471	-0.00197		1470	-0.000354396	1470	-0.000397309	1470	0.00215
1472	0.0182948	1472	0.00124255	1472	-0.00133		1471	0.000154194	1471	-0.000355149	1471	0.00245
1473	0.0183321	1473	0.00178586	1473	-0.000776722		1472	0.000662785	1472	-0.000312989	1472	0.00265
1474	0.0184694	1474	0.00242918	1474	-0.000327903		1473	0.00127	1473	-0.000270828	1473	0.00285
1475	0.0185068	1475	0.00297249	1475	0.000220915		1474	0.00198	1474	-0.000328668	1474	0.00305
1476	0.0185441	1476	0.0035158	1476	0.000769734		1475	0.00259	1475	-0.000386508	1475	0.00315
1477	0.0183814	1477	0.00385911	1477	0.00122		1476	0.0032	1476	-0.000244348	1476	0.00325
1478	0.0181188	1478	0.00410242	1478	0.00157		1477	0.00361	1477	-0.000102188	1477	0.00336
1479	0.0178561	1479	0.00434573	1479	0.00182		1478	0.00371	1478	3.99727e-05	1478	0.00356
1480	0.0174934	1480	0.00448904	1480	0.00207		1479	0.00382	1479	8.21328e-05	1479	0.00356
1481	0.0173308	1481	0.00483235	1481	0.00231		1480	0.00383	1480	-7.5707e-05	1480	0.00346
1482	0.0173681	1482	0.00537567	1482	0.00246		1481	0.00394	1481	-0.000233547	1481	0.00326
1483	0.0176055	1483	0.00611898	1483	0.00343		1482	0.00405	1482	-0.000291387	1482	0.00316
1484	0.0178428	1484	0.00686229	1484	0.00719		1483	0.00416	1483	-0.000249226	1483	0.00316
1485	0.0180801	1485	0.0076056	1485	0.01066		1484	0.00417	1484	-0.000207066	1484	0.00326
1486	0.0183175	1486	0.00834891	1486	0.01091		1485	0.00417	1485	-6.4906e-05	1485	0.00336
1487	0.0183548	1487	0.00889222	1487	0.01107		1486	0.00418	1486	-2.27458e-05	1486	0.00336
1488	0.0184921	1488	0.00953553	1488	0.01122		1487	0.00419	1487	-8.05856e-05	1487	0.00336
1489	0.0185295	1489	0.0100788	1489	0.01147		1488	0.0042	1488	-3.84254e-05	1488	0.00326
1490	0.0184668	1490	0.0105222	1490	0.01173		1489	0.00411	1489	3.73484e-06	1489	0.00326
1491	0.0184041	1491	0.0109655	1491	0.01168		1490	0.00392	1490	4.5895e-05	1490	0.00336
1492	0.0183415	1492	0.0114088	1492	0.01153		1491	0.00373	1491	8.80552e-05	1491	0.00337
1493	0.0182788	1493	0.0118521	1493	0.01119		1492	0.00363	1492	3.02154e-05	1492	0.00337
1494	0.0183161	1494	0.0123954	1494	0.01074		1493	0.00364	1493	-2.76244e-05	1493	0.00327
1495	0.0182535	1495	0.0128387	1495	0.0103		1494	0.00385	1494	-0.000285464	1494	0.00317
1496	0.0181908	1496	0.013282	1496	0.00985		1495	0.00396	1495	-0.000443304	1495	0.00307
1497	0.0179282	1497	0.0135253	1497	0.0092		1496	0.00407	1496	-0.000501144	1496	0.00297
1498	0.0176655	1498	0.0137686	1498	0.00866		1497	0.00398	1497	-0.000458984	1497	0.00297
1499	0.0172028	1499	0.013812	1499	0.00801		1498	0.00389	1498	-0.000416823	1498	0.00277
1500	0.0167402	1500	0.0138553	1500	0.00737		1499	0.00369	1499	-0.000174663	1499	0.00257
1501	0.0159775	1501	0.0135986	1501	0.00672		1500	0.0035	1500	-3.2503e-05	1500	0.00227
1502	0.0152148	1502	0.0133419	1502	0.00577		1501	0.00321	1501	0.000152503	1501	0.002
1503	0.0143522	1503	0.0129852	1503	0.00473		1502	0.00312	1502	0.000237509	1502	0.00173
1504	0.0134895	1504	0.0123749	1504	0.00348		1503	0.00303	1503	0.000322514	1503	0.00145
1505	0.0126268	1505	0.0113337	1505	0.00223		1504	0.00294	1504	0.00030752	1504	0.00118
1506	0.0118642	1506	0.0103925	1506	0.000988143		1505	0.00295	1505	0.000292526	1505	0.000909515
1507	0.0111015	1507	0.00945132	1507	-5.80176e-05		1506	0.00285	1506	0.000177532	1506	0.000537124
1508	0.0102388	1508	0.00841011	1508	-0.001		1507	0.00286	1507	-0.000137462	1507	0.000264732
1509	0.00927618	1509	0.0072689	1509	-0.00205		1508	0.00297	1508	-0.000352457	1508	9.2341e-05
1510	0.00831352	1510	0.0061277	1510	-0.0029		1509	0.0029	1509	-0.000567451	1509	-8.00505e-05
1511	0.00745085	1511	0.00508649	1511	-0.00354		1510	0.00323	1510	-0.000382445	1510	0.000147558
1512	0.00668819	1512	0.00414529	1512	-0.00399		1511	0.00546	1511	0.00170256	1511	0.00188
1513	0.00612553	1513	0.00340408	1513	-0.00433		1512	0.01389	1512	0.00968757	1512	0.0083
1514	0.00566286	1514	0.00276287	1514	-0.00468		1513	0.03412	1513	0.0291726	1513	0.02423
1515	0.0053002	1515	0.00222167	1515	-0.00483		1514	0.07105	1514	0.0654576	1514	0.05386
1516	0.00503753	1516	0.00178046	1516	-0.00477		1515	0.12658	1515	0.121243	1515	0.09919
1517	0.00487487	1517	0.00143926	1517	-0.00442		1516	0.19971	1516	0.196028	1516	0.15911
1518	0.0048122	1518	0.00119805	1518	-0.00383		1517	0.28694	1517	0.286413	1517	0.23014
1519	0.00474954	1519	0.000956844	1519	-0.0041		1518	0.38396	1518	0.387898	1518	0.30797
1520	0.00458688	1520	0.000615638	1520	-0.00408		1519	0.48739	1519	0.496183	1519	0.3888
1521	0.00442421	1521	0.000274432	1521	-0.00405		1520	0.59462	1520	0.608168	1520	0.47022
1522	0.00436155	1522	3.32264e-05	1522	-0.00393		1521	0.70405	1521	0.721553	1521	0.55105
1523	0.00429888	1523	-0.00020798	1523	-0.0036		1522	0.81418	1522	0.834938	1522	0.63048
1524	0.00433622	1524	-0.000349186	1524	-0.00317		1523	0.92391	1523	0.946823	1523	0.70761
1525	0.00437356	1525	-0.000490392	1525	-0.00265		1524	1.03194	1524	1.05581	1524	0.78173
1526	0.00421089	1526	-0.000831598	1526	-0.00222		1525	1.13657	1525	1.16009	1525	0.85176
1527	0.00394823	1527	-0.0012728	1527	-0.0017		1526	1.2354	1526	1.25698	1526	0.91579
1528	0.00368556	1528	-0.00171401	1528	-0.00107		1527	1.32353	1527	1.34216	1527	0.97012
1529	0.0034229	1529	-0.00215522	1529	-0.00024505		1528	1.39516	1528	1.40965	1528	1.01024
1530	0.00316023	1530	-0.00259642	1530	0.000680839		1529	1.44519	1529	1.45433	1529	1.03187
1531	0.00299757	1531	-0.00293763	1531	0.00141		1530	1.47172	1530	1.47362	1530	1.0333
1532	0.00293491	1532	-0.00317883	1532	0.00203		1531	1.47585	1531	1.4683	1531	1.01603
1533	0.00277224	1533	-0.00352004	1533	0.00236		1532	1.46107	1532	1.44189	1532	0.98365
1534	0.00270958	1534	-0.00376125	1534	0.00258		1533	1.4316	1533	1.39927	1533	0.94078
1535	0.00254691	1535	-0.00410245	1535	0.00261		1534	1.39103	1534	1.34496	1534	0.89141
1536	0.00248425	1536	-0.00434366	1536	0.00317		1535	1.34226	1535	1.28244	1535	0.83804
1537	0.00242159	1537	-0.00458486	1537	0.00431		1536	1.28709	1536	1.21413	1536	0.78247
1538	0.00245892	1538	-0.00472607	1538	0.00525		1537	1.22712	1537	1.14221	1537	0.72559
1539	0.00259626	1539	-0.00476728	1539	0.00599		1538	1.16385	1538	1.0684	1538	0.66852
1540	0.00293359	1540	-0.00460848	1540	0.00653		1539	1.09888	1539	0.994383	1539	0.61235
1541	0.00317093	1541	-0.00454969	1541	0.00687		1540	1.03351	1540	0.921768	1540	0.55818
1542	0.00350826	1542	-0.00439089	1542	0.00701		1541	0.96914	1541	0.851853	1541	0.5069
1543	0.0037456	1543	-0.0043321	1543	0.00696		1542	0.90647	1542	0.785338	1542	0.45893
1544	0.00398294	1544	-0.00427331	1544	0.0066		1543	0.8461	1543	0.722523	1543	0.41456
1545	0.00432027	1545	-0.00411451	1545	0.00614		1544	0.78833	1544	0.663708	1544	0.37379
1546	0.00465761	1546	-0.00395572	1546	0.00568		1545	0.73316	1545	0.608993	1545	0.33631
1547	0.00499494	1547	-0.00379692	1547	0.00512		1546	0.68078	1546	0.558378	1546	0.30214
1548	0.00533228	1548	-0.00363813	1548	0.00446		1547	0.63131	1547	0.511463	1547	0.27117
1549	0.00576962	1549	-0.00337934	1549	0.0037		1548	0.58484	1548	0.468448	1548	0.2432
1550	0.00640695	1550	-0.00292054	1550	0.00275		1549	0.54157	1549	0.429033	1549	0.21792
1551	0.00653218	1551	-0.00246175	1551	0.00276		1550	0.5012	1550	0.393218	1550	0.19515
1552	0.0066574	1552	-0.00200295	1552	0.00278		1551	0.46363	1551	0.360603	1551	0.17458
1553	0.00668263	1553	-0.00164416	1553	0.00279		1552	0.42856	1552	0.330988	1552	0.15601
1554	0.00650786	1554	-0.00148537	1554	0.00291		1553	0.39599	1553	0.303973	1553	0.13933
1555	0.00633309	1555	-0.00132657	1555	0.00292		1554	0.36572	1554	0.279358	1554	0.12426
1556	0.00625831	1556	-0.00106778	1556	0.00294		1555	0.33765	1555	0.257043	1555	0.11069
1557	0.00618354	1557	-0.000808984	1557	0.00295		1556	0.31168	1556	0.236828	1556	0.09842
1558	0.00620877	1558	-0.00045019	1558	0.00307		1557	0.28751	1557	0.218413	1557	0.08745
1559	0.00613399	1559	-0.000191396	1559	0.00308		1558	0.26514	1558	0.201698	1558	0.07737
1560	0.00585922	1560	-0.000132602	1560	0.0031		1559	0.24456	1559	0.186483	1559	0.0681
1561	0.00538445	1561	-0.000273808	1561	0.00281		1560	0.22569	1560	0.172468	1560	0.05953
1562	0.00480967	1562	-0.000515014	1562	0.00213		1561	0.20842	1561	0.159553	1561	0.05156
1563	0.0048349	1563	-0.00015622	1563	0.00115		1562	0.19255	1562	0.147738	1562	0.04428
1564	0.00646013	1564	0.00178462	1564	0.000271019		1563	0.17798	1563	0.136923	1563	0.03761
1565	0.0111854	1565	0.00651339	1565	-0.000818419		1564	0.16441	1564	0.126908	1564	0.03174
1566	0.0201106	1566	0.0154422	1566	9.21419e-05		1565	0.15184	1565	0.117693	1565	0.02657
1567	0.0337358	1567	0.0290709	1567	0.0035		1566	0.14027	1566	0.109378	1566	0.02199
1568	0.051561	1568	0.0468997	1568	0.00971		1567	0.1298	1567	0.101763	1567	0.01802
1569	0.0728863	1569	0.0682285	1569	0.01842		1568	0.12023	1568	0.0948479	1568	0.01435
1570	0.0967115	1570	0.0920572	1570	0.02933		1569	0.11156	1569	0.0884329	1569	0.01118
1571	0.121937	1571	0.117286	1571	0.04204		1570	0.10369	1570	0.0826179	1570	0.0084
1572	0.148162	1572	0.143515	1572	0.05596		1571	0.09652	1571	0.0771029	1571	0.00603
1573	0.174887	1573	0.170244	1573	0.07057		1572	0.09005	1572	0.0720879	1572	0.00386
1574	0.201712	1574	0.197072	1574	0.08568		1573	0.08417	1573	0.0676729	1573	0.00189
1575	0.228438	1575	0.223801	1575	0.10109		1574	0.0788	1574	0.0637579	1574	0.000114506
1576	0.254763	1576	0.25013	1576	0.1167		1575	0.07383	1575	0.0604429	1575	-0.00126
1577	0.280188	1577	0.275559	1577	0.13261		1576	0.06926	1576	0.0575279	1576	-0.00233
1578	0.304013	1578	0.299387	1578	0.14842		1577	0.06519	1577	0.0550129	1577	-0.003
1579	0.324839	1579	0.320216	1579	0.16373		1578	0.06152	1578	0.0527979	1578	-0.00348
1580	0.341064	1580	0.336445	1580	0.17744		1579	0.05825	1579	0.050683	1579	-0.00375
1581	0.351789	1581	0.347174	1581	0.18865		1580	0.05528	1580	0.048768	1580	-0.00392
1582	0.356414	1582	0.351802	1582	0.19676		1581	0.05261	1581	0.047053	1581	-0.00399
1583	0.355539	1583	0.350931	1583	0.20147		1582	0.05024	1582	0.045638	1582	-0.00406
1584	0.349965	1584	0.34536	1584	0.20308		1583	0.04817	1583	0.044423	1583	-0.00396
1585	0.34079	1585	0.336189	1585	0.20189		1584	0.0463	1584	0.043208	1584	-0.00375
1586	0.328915	1586	0.324318	1586	0.1986		1585	0.04473	1585	0.042193	1585	-0.00364
1587	0.31504	1587	0.310446	1587	0.19341		1586	0.04326	1586	0.041378	1586	-0.00354
1588	0.299666	1588	0.295075	1588	0.18702		1587	0.04198	1587	0.040763	1587	-0.00353
1589	0.283191	1589	0.278604	1589	0.17954		1588	0.04081	1588	0.040148	1588	-0.00332
1590	0.266116	1590	0.261533	1590	0.17145		1589	0.03964	1589	0.039433	1589	-0.00312
1591	0.248941	1591	0.244361	1591	0.16286		1590	0.03857	1590	0.038618	1590	-0.00281
1592	0.231966	1592	0.22739	1592	0.15407		1591	0.0376	1591	0.037803	1591	-0.0026
1593	0.215492	1593	0.210919	1593	0.14528		1592	0.03673	1592	0.037088	1592	-0.0025
1594	0.199817	1594	0.195248	1594	0.13659		1593	0.03586	1593	0.036373	1593	-0.00249
1595	0.184942	1595	0.180376	1595	0.1283		1594	0.03519	1594	0.035758	1594	-0.00268
1596	0.171067	1596	0.166505	1596	0.12041		1595	0.03462	1595	0.035143	1595	-0.00288
1597	0.158093	1597	0.153534	1597	0.11292		1596	0.03405	1596	0.0344281	1596	-0.00297
1598	0.146018	1598	0.141463	1598	0.10563		1597	0.03358	1597	0.0336131	1597	-0.00296
1599	0.134843	1599	0.130292	1599	0.09884		1598	0.03301	1598	0.0327981	1598	-0.00295
1600	0.124468	1600	0.11992	1600	0.09235		1599	0.03244	1599	0.0319831	1599	-0.00295
1601	0.114894	1601	0.110349	1601	0.08636		1600	0.03177	1600	0.0311681	1600	-0.00284
1602	0.106019	1602	0.101478	1602	0.08057		1601	0.03109	1601	0.0302531	1601	-0.00283
1603	0.097944	1603	0.0934066	1603	0.07498		1602	0.03052	1602	0.0294381	1602	-0.00263
1604	0.0905692	1604	0.0860354	1604	0.06959		1603	0.02985	1603	0.0287231	1603	-0.00242
1605	0.0839944	1605	0.0794641	1605	0.0646		1604	0.02928	1604	0.0281081	1604	-0.00211
1606	0.0779196	1606	0.0733929	1606	0.05991		1605	0.02871	1605	0.0274931	1605	-0.00181
1607	0.0724449	1607	0.0679217	1607	0.05553		1606	0.02814	1606	0.0269781	1606	-0.0015
1608	0.0673701	1608	0.0628504	1608	0.05134		1607	0.02767	1607	0.0264631	1607	-0.00109
1609	0.0626953	1609	0.0581792	1609	0.04725		1608	0.0272	1608	0.0259481	1608	-0.000585724
1610	0.0583206	1610	0.053808	1610	0.04326		1609	0.02683	1609	0.0255331	1609	-7.88427e-05
1611	0.0542458	1611	0.0497368	1611	0.03927		1610	0.02646	1610	0.0252181	1610	0.000528038
1612	0.050471	1612	0.0459655	1612	0.03538		1611	0.02589	1611	0.0249031	1611	0.00103
1613	0.0470962	1613	0.0425943	1613	0.03159		1612	0.02522	1612	0.0246881	1612	0.00144
1614	0.0438215	1614	0.0393231	1614	0.0279		1613	0.02455	1613	0.0243732	1613	0.00185
1615	0.0408467	1615	0.0363518	1615	0.02421		1614	0.02397	1614	0.0239582	1614	0.00216
1616	0.0380719	1616	0.0335806	1616	0.02052		1615	0.0233	1615	0.0236432	1615	0.00246
1617	0.0355971	1617	0.0311094	1617	0.01693		1616	0.02273	1616	0.0232282	1616	0.00267
1618	0.0333224	1618	0.0288381	1618	0.01374		1617	0.02216	1617	0.0227132	1617	0.00288
1619	0.0312476	1619	0.0267669	1619	0.01075		1618	0.02169	1618	0.0222982	1618	0.00288
1620	0.0291728	1620	0.0246957	1620	0.00806		1619	0.02122	1619	0.0218832	1619	0.00289
1621	0.027298	1621	0.0228244	1621	0.00567		1620	0.02075	1620	0.0214682	1620	0.0029
1622	0.0255233	1622	0.0210532	1622	0.00358		1621	0.02028	1621	0.0211532	1621	0.003
1623	0.0238485	1623	0.019382	1623	0.00179		1622	0.01971	1622	0.0208382	1622	0.00301
1624	0.0224737	1624	0.0180107	1624	0.000309533		1623	0.01904	1623	0.0205232	1623	0.00302
1625	0.021099	1625	0.0166395	1625	-0.000773148		1624	0.01837	1624	0.0201082	1624	0.00302
1626	0.0197242	1626	0.0152683	1626	-0.00156		1625	0.0177	1625	0.0195932	1625	0.00293
1627	0.0185494	1627	0.014097	1627	-0.00194		1626	0.01713	1626	0.0189782	1626	0.00284
1628	0.0174746	1628	0.0130258	1628	-0.00202		1627	0.01676	1627	0.0184632	1627	0.00265
1629	0.0164999	1629	0.0120546	1629	-0.0019		1628	0.01638	1628	0.0181482	1628	0.00235
1630	0.0157251	1630	0.0112834	1630	-0.00149		1629	0.01611	1629	0.0178332	1629	0.00206
1631	0.0150503	1631	0.0106121	1631	-0.000769236		1630	0.01584	1630	0.0177182	1630	0.00197
1632	0.0144755	1632	0.0100409	1632	-5.19178e-05		1631	0.01567	1631	0.0175033	1631	0.00197
1633	0.0139008	1633	0.00946966	1633	0.000565401		1632	0.0154	1632	0.0171883	1632	0.00208
1634	0.013226	1634	0.00879843	1634	0.00118		1633	0.01513	1633	0.0166733	1633	0.00229
1635	0.0124512	1635	0.0080272	1635	0.0017		1634	0.01486	1634	0.0161583	1634	0.00239
1636	0.0118765	1636	0.00745597	1636	0.00222		1635	0.01459	1635	0.0154433	1635	0.0024
1637	0.0113017	1637	0.00688474	1637	0.00263		1636	0.01432	1636	0.0147283	1636	0.00231
1638	0.0107269	1638	0.00631351	1638	0.00295		1637	0.01415	1637	0.0140133	1637	0.00191
1639	0.0101521	1639	0.00574227	1639	0.00297		1638	0.01398	1638	0.0133983	1638	0.00142
1640	0.00967736	1640	0.00527104	1640	0.00354		1639	0.01391	1639	0.0128833	1639	0.000827583
1641	0.00930258	1641	0.00489981	1641	0.00391		1640	0.01374	1640	0.0123683	1640	0.000434464
1642	0.00902781	1642	0.00462858	1642	0.00408		1641	0.01357	1641	0.0119533	1641	4.1345e-05
1643	0.00865304	1643	0.00425735	1643	0.00414		1642	0.01329	1642	0.0115383	1642	-0.000151774
1644	0.0086771	1644	0.00388612	1644	0.00401		1643	0.01282	1643	0.0110233	1643	-0.000344893
1645	0.00867637	1645	0.00331489	1645	0.00378		1644	0.01215	1644	0.0104083	1644	-0.000538012
1646	0.00857565	1646	0.00264365	1646	0.00355		1645	0.01138	1645	0.00979334	1645	-0.000731132
1647	0.00847492	1647	0.00197242	1647	0.00321		1646	0.01071	1646	0.00917834	1646	-0.000924251
1648	0.00847419	1648	0.00140119	1648	0.00308		1647	0.01004	1647	0.00866335	1647	-0.00112
1649	0.00847346	1649	0.000829961	1649	0.00285		1648	0.00937	1648	0.00814835	1648	-0.00121
1650	0.00847274	1650	0.00025873	1650	0.00251		1649	0.0087	1649	0.00773336	1649	-0.0013
1651	0.00837201	1651	-0.000174199	1651	0.00218		1650	0.00813	1650	0.00751837	1650	-0.0014
1652	0.00807128	1652	6.97778e-06	1652	0.00175		1651	0.00746	1651	0.00750337	1651	-0.00129
1653	0.00767055	1653	8.81546e-05	1653	0.00141		1652	0.00669	1652	0.00748838	1652	-0.000982965
1654	0.00726983	1654	0.000169331	1654	0.00128		1653	0.00592	1653	0.00747338	1653	-0.000576085
1655	0.0067691	1655	0.000150508	1655	0.00145		1654	0.00505	1654	0.00745839	1654	-6.92037e-05
1656	0.00626837	1656	0.000131685	1656	0.00181		1655	0.00428	1655	0.00724339	1655	0.000337677
1657	0.00576765	1657	0.000112862	1657	0.00228		1656	0.0036	1656	0.0071284	1656	0.000744558
1658	0.00526692	1658	9.40387e-05	1658	0.00275		1657	0.00293	1657	0.00701341	1657	0.00115
1659	0.00476619	1659	7.52155e-05	1659	0.00247		1658	0.00256	1658	0.00689841	1658	0.00146
1660	0.00436546	1660	0.000156392	1660	0.00187		1659	0.00257	1659	0.00668342	1659	0.00167
1661	0.00386474	1661	0.000137569	1661	0.00138		1660	0.00267	1660	0.00656842	1660	0.00197
1662	0.00336401	1662	0.000118746	1662	0.000883376		1661	0.00277	1661	0.00625343	1661	0.00208
1663	0.00286328	1663	9.99227e-05	1663	0.000388162		1662	0.00277	1662	0.00613844	1662	0.00209
1664	0.00236255	1664	8.10995e-05	1664	9.29479e-05		1663	0.00267	1663	0.00592344	1663	0.00209
1665	0.00186183	1665	6.22763e-05	1665	-0.000202266		1664	0.00248	1664	0.00570845	1664	0.0021
1666	0.0013611	1666	4.34532e-05	1666	-0.00049748		1665	0.00218	1665	0.00539345	1665	0.00201
1667	0.000960372	1667	0.00012463	1667	-0.000692694		1666	0.00198	1666	0.00497846	1666	0.00181
1668	0.000659644	1668	0.000310203	1668	-0.000887908		1667	0.00168	1667	0.00456346	1667	0.00162
1669	0.000158917	1669	0.000301921	1669	-0.00118		1668	0.00149	1668	0.00414847	1668	0.00143
1670	-0.000441811	1670	0.000193639	1670	-0.00158		1669	0.00129	1669	0.00373348	1669	0.00103
1671	-0.00104254	1671	8.53565e-05	1671	-0.00207		1670	0.00129	1670	0.00331848	1670	0.00074089
1672	-0.00184327	1672	-0.000222926	1672	-0.00257		1671	0.00109	1671	0.00290349	1671	0.000447771
1673	-0.00254399	1673	-0.000431208	1673	-0.00296		1672	0.000993978	1672	0.00228849	1672	0.000154652
1674	-0.00334472	1674	-0.00073949	1674	-0.00316		1673	0.000896196	1673	0.0017735	1673	6.15327e-05
1675	-0.00434545	1675	-0.00124777	1675	-0.00315		1674	0.000598414	1674	0.0013585	1674	-3.15864e-05
1676	-0.00534617	1676	-0.00175605	1676	-0.00285		1675	0.000300633	1675	0.00104351	1675	-2.47056e-05
1677	-0.0064469	1677	-0.00236434	1677	-0.00244		1676	0.000102851	1676	0.000828516	1676	-1.78247e-05
1678	-0.00754763	1678	-0.00297262	1678	-0.00194		1677	-9.49302e-05	1677	0.000613522	1677	-1.09439e-05
1679	-0.00854836	1679	-0.0034809	1679	-0.00134		1678	-0.000192712	1678	0.000398528	1678	-0.000104063
1680	-0.00954908	1680	-0.00398918	1680	-0.00116		1679	-0.000190493	1679	0.000283533	1679	-9.71821e-05
1681	-0.0105498	1681	-0.00449746	1681	-0.00121		1680	-8.82749e-05	1680	6.85392e-05	1680	-9.03013e-05
1682	-0.0114505	1682	-0.00490575	1682	-0.00116		1681	0.000113944	1681	-0.000146455	1681	0.00011658
1683	-0.0124513	1683	-0.00541403	1683	-0.000910363		1682	0.000416162	1682	-0.000261449	1682	0.00042346
1684	-0.013452	1684	-0.00592231	1684	-0.000461742		1683	0.00061838	1683	-0.000276443	1683	0.000830341
1685	-0.0144527	1685	-0.00643059	1685	0.00018688		1684	0.000920599	1684	-0.000252995	1684	0.00124
1686	-0.0153534	1686	-0.00683888	1686	0.00114		1685	0.00102	1685	-0.000229547	1685	0.00164
1687	-0.0162542	1687	-0.00724716	1687	0.00218		1686	0.00113	1686	-0.000206098	1686	0.00195
1688	-0.0169549	1688	-0.00745544	1688	0.00343		1687	0.00123	1687	-0.00018265	1687	0.00236
1689	-0.0175556	1689	-0.00756372	1689	0.00458		1688	0.00133	1688	-0.000259202	1688	0.00256
1690	-0.0180564	1690	-0.007572	1690	0.00563		1689	0.00133	1689	-0.000435753	1689	0.00267
1691	-0.0184571	1691	-0.00748029	1691	0.00658		1690	0.00133	1690	-0.000612305	1690	0.00268
1692	-0.0188578	1692	-0.00738857	1692	0.00753		1691	0.00134	1691	-0.000688857	1691	0.00269
1693	-0.0191585	1693	-0.00719685	1693	0.00838		1692	0.00124	1692	-0.000665408	1692	0.00269
1694	-0.0195593	1694	-0.00710513	1694	0.00932		1693	0.00114	1693	-0.00064196	1693	0.0028
1695	-0.01986	1695	-0.00691341	1695	0.01027		1694	0.000942783	1694	-0.000618512	1694	0.00301
1696	-0.0200607	1696	-0.0066217	1696	0.01102		1695	0.000845002	1695	-0.000595064	1695	0.00301
1697	-0.0201614	1697	-0.00622998	1697	0.01157		1696	0.00064722	1696	-0.000671615	1696	0.00292
1698	-0.0202622	1698	-0.00583826	1698	0.01182		1697	0.000449439	1697	-0.000848167	1697	0.00273
1699	-0.0203629	1699	-0.00544654	1699	0.01187		1698	0.000251657	1698	-0.000924719	1698	0.00233
1700	-0.0203636	1700	-0.00495482	1700	0.01162		1699	0.000153876	1699	-0.00110127	1699	0.00194
1701	-0.0204644	1701	-0.00456311	1701	0.01116		1700	5.60941e-05	1700	-0.00107782	1700	0.00165
1702	-0.0205651	1702	-0.00417139	1702	0.01061		1701	-0.000241687	1701	-0.000954374	1701	0.00125
1703	-0.0206658	1703	-0.00377967	1703	0.00986		1702	-0.000539469	1702	-0.000730925	1702	0.000961078
1704	-0.0206665	1704	-0.00328795	1704	0.00891		1703	-0.000837251	1703	-0.000307477	1703	0.000767959
1705	-0.0207673	1705	-0.00289624	1705	0.00776		1704	-0.00104	1704	1.59714e-05	1704	0.00047484
1706	-0.020868	1706	-0.00250452	1706	0.00641		1705	-0.00123	1705	0.00023942	1705	0.00018172
1707	-0.0208687	1707	-0.0020128	1707	0.00486		1706	-0.00133	1706	0.000262868	1706	-1.13988e-05
1708	-0.0209695	1708	-0.00162108	1708	0.00311		1707	-0.00133	1707	0.000286316	1707	-0.000204518
1709	-0.0210702	1709	-0.00122936	1709	0.00115		1708	-0.00133	1708	0.000209765	1708	-0.000297637
1710	-0.0212709	1710	-0.000937646	1710	-0.000997586		1709	-0.00132	1709	0.000333213	1709	-0.000390756
1711	-0.0214716	1711	-0.000645928	1711	-0.00325		1710	-0.00122	1710	0.000456661	1710	-0.000483875
1712	-0.0217724	1712	-0.00045421	1712	-0.00361		1711	-0.00112	1711	0.00058011	1711	-0.000576994
1713	-0.0221731	1713	-0.000362492	1713	-0.00357		1712	-0.00102	1712	0.000703558	1712	-0.000670114
1714	-0.0224738	1714	-0.000170774	1714	-0.00374		1713	-0.00112	1713	0.000727006	1713	-0.000763233
1715	-0.0227745	1715	2.09437e-05	1715	-0.004		1714	-0.00121	1714	0.000750455	1714	-0.000756352
1716	-0.0228753	1716	0.000412662	1716	-0.00446		1715	-0.00111	1715	0.000673903	1715	-0.000749471
1717	-0.022876	1717	0.000904379	1717	-0.00492		1716	-0.000908411	1716	0.000697351	1716	-0.00064259
1718	-0.0227767	1718	0.0014961	1718	-0.00539		1717	-0.000706192	1717	0.0006208	1717	-0.000435709
1719	-0.0225775	1719	0.0013888	1719	-0.00575		1718	-0.000503974	1718	0.000644248	1718	-0.000328828
1720	-0.0224782	1720	0.000825594	1720	-0.00591		1719	-0.000401755	1719	0.000667696	1719	-0.000221948
1721	-0.0222789	1721	0.000362385	1721	-0.00578		1720	-0.000399537	1720	0.000591145	1720	-0.000215067
1722	-0.0220796	1722	-0.000100823	1722	-0.00554		1721	-0.000297318	1721	0.000714593	1721	-0.000308186
1723	-0.0217804	1723	-0.000464031	1723	-0.0052		1722	-0.0002951	1722	0.000838041	1722	-0.000401305
1724	-0.0214811	1724	-0.000827239	1724	-0.00476		1723	-0.000192882	1723	0.00106149	1723	-0.000394424
1725	-0.0209818	1725	-0.000990447	1725	-0.00443		1724	-9.06631e-05	1724	0.00118494	1724	-0.000387543
1726	-0.0204825	1726	-0.00115366	1726	-0.00409		1725	1.15554e-05	1725	0.00130839	1725	-0.000180662
1727	-0.0197833	1727	-0.00111686	1727	-0.00365		1726	0.000113774	1726	0.00113183	1726	-7.37815e-05
1728	-0.019084	1728	-0.00108007	1728	-0.00302		1727	1.59923e-05	1727	0.00105528	1727	3.30994e-05
1729	-0.0182847	1729	-0.00094328	1729	-0.00228		1728	-8.17893e-05	1728	0.000878731	1728	0.00013998
1730	-0.0174855	1730	-0.000806488	1730	-0.00134		1729	-0.000279571	1729	0.000702179	1729	0.000146861
1731	-0.0167862	1731	-0.000769697	1731	-0.000104669		1730	-0.000477352	1730	0.000625628	1730	0.000153742
1732	-0.0160869	1732	-0.000732905	1732	-0.000535257		1731	-0.000775134	1731	0.000549076	1731	6.06229e-05
1733	-0.0153876	1733	-0.000696113	1733	-0.0011		1732	-0.000972915	1732	0.000372524	1732	-0.000132496
1734	-0.0146884	1734	-0.000659321	1734	-0.00176		1733	-0.00117	1733	0.000195973	1733	-0.000325615
1735	-0.0138891	1735	-0.00052253	1735	-0.00233		1734	-0.00117	1734	-8.05789e-05	1734	-0.000518735
1736	-0.0129898	1736	-0.000285738	1736	-0.00299		1735	-0.00117	1735	-0.000357131	1735	-0.000611854
1737	-0.0119905	1737	5.10541e-05	1737	-0.00346		1736	-0.00126	1736	-0.000533682	1736	-0.000804973
1738	-0.0109913	1738	0.000387846	1738	-0.00372		1737	-0.00136	1737	-0.000710234	1737	-0.000798092
1739	-0.009992	1739	0.000724638	1739	-0.00369		1738	-0.00166	1738	-0.000886786	1738	-0.000991211
1740	-0.00899273	1740	0.00106143	1740	-0.00345		1739	-0.00196	1739	-0.00106334	1739	-0.00118
1741	-0.00799345	1741	0.00139822	1741	-0.00322		1740	-0.00236	1740	-0.00103989	1740	-0.00148
1742	-0.00699418	1742	0.00173501	1742	-0.00278		1741	-0.00265	1741	-0.000916441	1741	-0.00177
1743	-0.00609491	1743	0.0019718	1743	-0.00245		1742	-0.00305	1742	-0.000692992	1742	-0.00176
1744	-0.00519564	1744	0.0022086	1744	-0.00201		1743	-0.00325	1743	-0.000469544	1743	-0.00166
1745	-0.00429636	1745	0.00244539	1745	-0.00158		1744	-0.00335	1744	-0.000346096	1744	-0.00135
1746	-0.00349709	1746	0.00258218	1746	-0.00114		1745	-0.00334	1745	-0.000322647	1745	-0.00114
1747	-0.00259782	1747	0.00281897	1747	-0.000805876		1746	-0.00324	1746	-0.000299199	1746	-0.000836164
1748	-0.00169855	1748	0.00305576	1748	-0.000470584		1747	-0.00324	1747	-0.000375751	1747	-0.000729283
1749	-0.000799273	1749	0.00329256	1749	-0.000235292		1748	-0.00334	1748	-0.000252302	1748	-0.000522402
1750	-9.9476e-13	1750	0.00342935	1750	-1.50635e-12		1749	-0.00344	1749	-0.000228854	1749	-0.000315522
1751	0.000324367	1751	0.00346614	1751	0.00157		1750	-0.00353	1750	-0.000105406	1750	-8.64071e-06
1752	0.000548735	1752	0.00340293	1752	0.00304		1751	-0.00353	1751	0.000118043	1751	0.00029824
1753	0.000773102	1753	0.00333972	1753	0.00422		1752	-0.00343	1752	0.000341491	1752	0.000605121
1754	0.000897469	1754	0.00317651	1754	0.00489		1753	-0.00333	1753	0.000564939	1753	0.000812002
1755	0.00102184	1755	0.00301331	1755	0.00536		1754	-0.00322	1754	0.000588388	1754	0.000818883
1756	0.0010462	1756	0.0027501	1756	0.00553		1755	-0.00302	1755	0.000611836	1755	0.000725764
1757	0.000970572	1757	0.00238689	1757	0.00561		1756	-0.00292	1756	0.000435284	1756	0.000432644
1758	0.00109494	1758	0.00222368	1758	0.00568		1757	-0.00282	1757	0.000358733	1757	0.000239525
1759	0.00121931	1759	0.00206047	1759	0.00565		1758	-0.00282	1758	0.000182181	1758	-5.35938e-05
1760	0.00134367	1760	0.00189727	1760	0.00542		1759	-0.00291	1759	0.000105629	1759	-0.000446713
1761	0.00116804	1761	0.00143406	1761	0.0047		1760	-0.00301	1760	0.000229077	1760	-0.000739832
1762	0.000792408	1762	0.000770849	1762	0.00337		1761	-0.00311	1761	0.000352526	1761	-0.00113
1763	0.000516776	1763	0.000305063	1763	0.00144		1762	-0.00301	1762	0.000475974	1762	-0.00143
1764	0.00164114	1764	0.0013393	1764	-0.000686395		1763	-0.003	1763	0.000599422	1763	-0.00162
1765	0.00556551	1765	0.00517354	1765	-0.00211		1764	-0.0028	1764	0.000722871	1764	-0.00181
1766	0.0134899	1766	0.0130078	1766	-0.00185		1765	-0.0027	1765	0.000646319	1765	-0.00201
1767	0.0260142	1767	0.025442	1767	0.000446719		1766	-0.0025	1766	0.000569767	1766	-0.0021
1768	0.0426386	1768	0.0419762	1768	0.00554		1767	-0.0024	1767	0.000293216	1767	-0.00229
1769	0.062663	1769	0.0619105	1769	0.01323		1768	-0.00229	1768	1.66641e-05	1768	-0.00238
1770	0.0850873	1770	0.0842447	1770	0.02282		1769	-0.00219	1769	-0.000159888	1769	-0.00228
1771	0.109112	1771	0.108179	1771	0.03382		1770	-0.00199	1770	-0.000336439	1770	-0.00207
1772	0.134236	1772	0.133213	1772	0.04581		1771	-0.00179	1771	-0.000312991	1771	-0.00176
1773	0.15996	1773	0.158847	1773	0.0585		1772	-0.00138	1772	-0.000289543	1772	-0.00156
1774	0.185985	1774	0.184782	1774	0.0717		1773	-0.00108	1773	-0.000266094	1773	-0.00135
1775	0.212109	1775	0.210816	1775	0.08509		1774	-0.000679741	1774	-0.000242646	1774	-0.00124
1776	0.237934	1776	0.23655	1776	0.09878		1775	-0.000377522	1775	-0.000119198	1775	-0.00104
1777	0.262958	1777	0.261484	1777	0.11267		1776	-7.53037e-05	1776	-9.57494e-05	1776	-0.000829738
1778	0.286682	1778	0.285119	1778	0.12657		1777	0.000226915	1777	2.7699e-05	1777	-0.000622857
1779	0.307607	1779	0.305953	1779	0.13996		1778	0.000529133	1778	0.000151147	1778	-0.000315976
1780	0.324531	1780	0.322787	1780	0.15195		1779	0.000731352	1779	0.000374596	1779	-0.000109096
1781	0.336255	1781	0.334421	1781	0.16154		1780	0.00103	1780	0.000598044	1780	-2.21476e-06
1782	0.34208	1782	0.340156	1782	0.16784		1781	0.00124	1781	0.000621492	1781	0.000104666
1783	0.342504	1783	0.34049	1783	0.17073		1782	0.00134	1782	0.000644941	1782	0.000211547
1784	0.338228	1784	0.336124	1784	0.17042		1783	0.00144	1783	0.000668389	1783	0.000218428
1785	0.330353	1785	0.328158	1785	0.16772		1784	0.00154	1784	0.000691837	1784	0.000225309
1786	0.319677	1786	0.317393	1786	0.16311		1785	0.00164	1785	0.000615286	1785	0.00023219
1787	0.306902	1787	0.304527	1787	0.1571		1786	0.00185	1786	0.000638734	1786	0.00023907
1788	0.292426	1788	0.289961	1788	0.15009		1787	0.00205	1787	0.000562182	1787	0.000345951
1789	0.27665	1789	0.274095	1789	0.14229		1788	0.00225	1788	0.000485631	1788	0.000452832
1790	0.260075	1790	0.257429	1790	0.13398		1789	0.00235	1789	0.000509079	1789	0.000359713
1791	0.243199	1791	0.240464	1791	0.12557		1790	0.00236	1790	0.000432527	1790	0.000266594
1792	0.226523	1792	0.223698	1792	0.11726		1791	0.00226	1791	0.000255975	1791	0.000173475
1793	0.210448	1793	0.207532	1793	0.10936		1792	0.00226	1792	-0.000120576	1792	0.000180356
1794	0.194972	1794	0.191966	1794	0.10195		1793	0.00236	1793	-0.000497128	1793	8.72365e-05
1795	0.180397	1795	0.177301	1795	0.09524		1794	0.00256	1794	-0.00097368	1794	-5.88265e-06
1796	0.166521	1796	0.163335	1796	0.08924		1795	0.00287	1795	-0.00135023	1795	-0.000199002
1797	0.153545	1797	0.150269	1797	0.08393		1796	0.00307	1796	-0.00162678	1796	-0.000392121
1798	0.14157	1798	0.138203	1798	0.07942		1797	0.00317	1797	-0.00180333	1797	-0.00058524
1799	0.130494	1799	0.127038	1799	0.07561		1798	0.00317	1798	-0.00197989	1798	-0.000778359
1800	0.120318	1800	0.116772	1800	0.07251		1799	0.00318	1799	-0.00215644	1799	-0.000771478
1801	0.110943	1801	0.107306	1801	0.0699		1800	0.00308	1800	-0.00233299	1800	-0.000864597
1802	0.102367	1802	0.0986403	1802	0.06769		1801	0.00298	1801	-0.00255117	1801	-0.00087117
1803	0.0944915	1803	0.0906745	1803	0.06588		1802	0.00288	1802	-0.00286934	1802	-0.000977743
1804	0.0873158	1804	0.0834088	1804	0.06438		1803	0.00308	1803	-0.00298752	1803	-0.000984315
1805	0.0806402	1805	0.076643	1805	0.06307		1804	0.00329	1804	-0.0031057	1804	-0.000790888
1806	0.0745646	1806	0.0704772	1806	0.06186		1805	0.00349	1805	-0.00322388	1805	-0.000597461
1807	0.0689889	1807	0.0648115	1807	0.06056		1806	0.00369	1806	-0.00324205	1806	-0.000304033
1808	0.0639133	1808	0.0596457	1808	0.05925		1807	0.00389	1807	-0.00326023	1807	-0.000110606
1809	0.0591377	1809	0.0547799	1809	0.05784		1808	0.0039	1808	-0.00317841	1808	-1.71787e-05
1810	0.054862	1810	0.0504142	1810	0.05633		1809	0.00356	1809	-0.00299658	1809	7.62486e-05
1811	0.0508864	1811	0.0463484	1811	0.05473		1810	0.00363	1810	-0.00251476	1810	0.000469676
1812	0.0472108	1812	0.0425826	1812	0.05302		1811	0.0054	1811	-0.000532939	1811	0.00246
1813	0.0438351	1813	0.0391169	1813	0.05131		1812	0.01266	1812	0.00634888	1812	0.00906
1814	0.0408595	1814	0.0360511	1814	0.0493		1813	0.03013	1813	0.0227307	1813	0.02485
1815	0.0380839	1815	0.0331854	1815	0.0472		1814	0.06209	1814	0.0527125	1814	0.05374
1816	0.0354082	1816	0.0304196	1816	0.04499		1815	0.11036	1815	0.0982944	1815	0.09734
1817	0.0329326	1817	0.0278538	1817	0.04268		1816	0.17403	1816	0.158676	1816	0.15433
1818	0.030657	1818	0.0254881	1818	0.04018		1817	0.24989	1817	0.231258	1817	0.22112
1819	0.0287813	1819	0.0235223	1819	0.03777		1818	0.33456	1818	0.31264	1818	0.29392
1820	0.0272057	1820	0.0218565	1820	0.03526		1819	0.42503	1819	0.399922	1819	0.36921
1821	0.0258301	1821	0.0203908	1821	0.03295		1820	0.51939	1820	0.491003	1820	0.4452
1822	0.0246545	1822	0.019125	1822	0.03075		1821	0.61626	1821	0.584685	1821	0.5208
1823	0.0234788	1823	0.0178593	1823	0.02874		1822	0.71443	1822	0.679667	1822	0.59539
1824	0.0223032	1824	0.0165935	1824	0.02673		1823	0.81259	1823	0.774749	1823	0.66848
1825	0.0212276	1825	0.0154277	1825	0.02482		1824	0.90966	1824	0.868731	1824	0.73898
1826	0.0201519	1826	0.014262	1826	0.02282		1825	1.00413	1825	0.960213	1825	0.80587
1827	0.0189763	1827	0.0129962	1827	0.02091		1826	1.09369	1826	1.04679	1826	0.86716
1828	0.0178007	1828	0.0117304	1828	0.0191		1827	1.17446	1827	1.12468	1827	0.91936
1829	0.016725	1829	0.0105647	1829	0.0173		1828	1.24123	1828	1.18886	1828	0.95795
1830	0.0157494	1830	0.00949891	1830	0.01569		1829	1.28959	1829	1.23494	1829	0.97914
1831	0.0151738	1831	0.00883314	1831	0.01428		1830	1.31756	1830	1.26102	1830	0.98154
1832	0.0146981	1832	0.00826738	1832	0.01287		1831	1.32613	1831	1.2676	1831	0.96673
1833	0.0142225	1833	0.00770162	1833	0.01137		1832	1.31829	1832	1.25759	1832	0.93843
1834	0.0136469	1834	0.00703585	1834	0.00996		1833	1.29746	1833	1.23437	1833	0.90062
1835	0.0131712	1835	0.00647009	1835	0.00865		1834	1.26662	1834	1.20085	1834	0.85701
1836	0.0125956	1836	0.00580432	1836	0.00734		1835	1.22809	1835	1.15933	1835	0.80951
1837	0.01202	1837	0.00513856	1837	0.00614		1836	1.18336	1836	1.11141	1836	0.7596
1838	0.0115443	1838	0.0045728	1838	0.00503		1837	1.13382	1837	1.05869	1837	0.70819
1839	0.0111687	1839	0.00410703	1839	0.00412		1838	1.08079	1838	1.00238	1838	0.65629
1840	0.0107931	1840	0.00364127	1840	0.00332		1839	1.02586	1839	0.944258	1839	0.60498
1841	0.0107174	1841	0.00347551	1841	0.00261		1840	0.97002	1840	0.88554	1840	0.55537
1842	0.0105418	1842	0.00320974	1842	0.00204		1841	0.91449	1841	0.827322	1841	0.50807
1843	0.0103662	1843	0.00294398	1843	0.00161		1842	0.85986	1842	0.770604	1842	0.46366
1844	0.0100905	1844	0.00257822	1844	0.00118		1843	0.80672	1843	0.715785	1843	0.42225
1845	0.0096149	1845	0.00201245	1845	0.000742813		1844	0.75529	1844	0.663367	1844	0.38385
1846	0.00913927	1846	0.00144669	1846	0.000510236		1845	0.70576	1845	0.613449	1845	0.34824
1847	0.00846363	1847	0.000680926	1847	0.00047766		1846	0.65822	1846	0.566331	1846	0.31543
1848	0.007888	1848	1.51622e-05	1848	0.000545084		1847	0.61289	1847	0.522013	1847	0.28513
1849	0.00731237	1849	-0.000220191	1849	0.000712508		1848	0.56986	1848	0.480595	1848	0.25752
1850	0.00673674	1850	3.20074e-05	1850	0.000773921		1849	0.52922	1849	0.442176	1849	0.23231
1851	0.0060611	1851	0.000184206	1851	-0.000302219		1850	0.49099	1850	0.406558	1850	0.20961
1852	0.00538547	1852	0.000336404	1852	-0.00118		1851	0.45506	1851	0.37364	1851	0.1889
1853	0.00470984	1853	0.000488602	1853	-0.00185		1852	0.42132	1852	0.343322	1852	0.17009
1854	0.00393421	1854	0.000540801	1854	-0.00223		1853	0.38979	1853	0.315404	1853	0.15299
1855	0.00305857	1855	0.000492999	1855	-0.00251		1854	0.36035	1854	0.289585	1854	0.13728
1856	0.00218294	1856	0.000445197	1856	-0.00258		1855	0.33282	1855	0.265867	1855	0.12287
1857	0.00130731	1857	0.000397396	1857	-0.00256		1856	0.30709	1856	0.244049	1856	0.10967
1858	0.00110027	1858	0.000449594	1858	-0.00254		1857	0.28315	1857	0.224031	1857	0.09776
1859	0.000735055	1859	0.000301792	1859	-0.00251		1858	0.26072	1858	0.205713	1858	0.08685
1860	0.000369834	1860	0.000153991	1860	-0.00229		1859	0.23989	1859	0.188895	1859	0.07695
1861	4.61376e-06	1861	6.18911e-06	1861	-0.00196		1860	0.22045	1860	0.173576	1860	0.06774
1862	-0.000460607	1862	-0.000241613	1862	-0.00134		1861	0.20262	1861	0.159558	1861	0.05933
1863	-0.000825827	1863	-0.000389414	1863	-0.000715908		1862	0.18629	1862	0.14694	1862	0.05153
1864	-0.00129105	1864	-0.000637216	1864	-0.000192049		1863	0.17135	1863	0.135422	1863	0.04452
1865	-0.00175627	1865	-0.000885018	1865	0.000131811		1864	0.15772	1864	0.125004	1864	0.03811
1866	-0.00232149	1866	-0.00123282	1866	0.00045567		1865	0.14519	1865	0.115385	1865	0.03241
1867	-0.00288671	1867	-0.00158062	1867	0.000479529		1866	0.13365	1866	0.106667	1866	0.0272
1868	-0.00335193	1868	-0.00182842	1868	0.000403388		1867	0.12312	1867	0.0985491	1867	0.0225
1869	-0.00371715	1869	-0.00197622	1869	0.000254116		1868	0.11339	1868	0.091331	1868	0.01829
1870	-0.00398237	1870	-0.00202403	1870	0.00132		1869	0.10455	1869	0.0850128	1869	0.01428
1871	-0.00424759	1871	-0.00207183	1871	0.00229		1870	0.09652	1870	0.0793946	1870	0.01078
1872	-0.00461281	1872	-0.00221963	1872	0.00336		1871	0.08939	1871	0.0743764	1871	0.00767
1873	-0.00497803	1873	-0.00236743	1873	0.00423		1872	0.08305	1872	0.0698582	1872	0.00496
1874	-0.00514325	1874	-0.00231523	1874	0.005		1873	0.07742	1873	0.0658401	1873	0.00266
1875	-0.00530847	1875	-0.00226303	1875	0.00527		1874	0.07248	1874	0.0621219	1874	0.000649026
1876	-0.00537369	1876	-0.00211084	1876	0.00534		1875	0.06795	1875	0.0589037	1875	-0.000957547
1877	-0.00553891	1877	-0.00205864	1877	0.00511		1876	0.06382	1876	0.0560855	1876	-0.00226
1878	-0.00560413	1878	-0.00190644	1878	0.00498		1877	0.05998	1877	0.0534674	1877	-0.00327
1879	-0.00576935	1879	-0.00185424	1879	0.00485		1878	0.05625	1878	0.0511492	1878	-0.00408
1880	-0.00603457	1880	-0.00190204	1880	0.00482		1879	0.05282	1879	0.049031	1879	-0.00488
1881	-0.00619979	1881	-0.00184984	1881	0.00469		1880	0.04968	1880	0.0471128	1880	-0.00559
1882	-0.00626501	1882	-0.00169765	1882	0.00446		1881	0.04685	1881	0.0453947	1881	-0.0062
1883	-0.00643023	1883	-0.00164545	1883	0.00413		1882	0.04432	1882	0.0438765	1882	-0.0065
1884	-0.00669545	1884	-0.00169325	1884	0.0036		1883	0.04228	1883	0.0425583	1883	-0.00671
1885	-0.00706068	1885	-0.00184105	1885	0.00307		1884	0.04045	1884	0.0412401	1884	-0.00672
1886	-0.0075259	1886	-0.00208885	1886	0.00254		1885	0.03892	1885	0.0400219	1885	-0.00651
1887	-0.00789112	1887	-0.00223665	1887	0.00181		1886	0.03738	1886	0.0389038	1886	-0.0063
1888	-0.00825634	1888	-0.00238446	1888	0.00118		1887	0.03605	1887	0.0378856	1887	-0.0062
1889	-0.00862156	1889	-0.00253226	1889	0.00064609		1888	0.03482	1888	0.0369674	1888	-0.00609
1890	-0.00898678	1890	-0.00268006	1890	0.000315689		1889	0.03378	1889	0.0362492	1889	-0.00589
1891	-0.009352	1891	-0.00282786	1891	0.000185288		1890	0.03295	1890	0.0354311	1890	-0.00568
1892	-0.00981722	1892	-0.00307566	1892	-0.000145113		1891	0.03222	1891	0.0346129	1891	-0.00547
1893	-0.0102824	1893	-0.00332346	1893	-0.000575515		1892	0.03168	1892	0.0338947	1892	-0.00537
1894	-0.0107477	1894	-0.00357127	1894	-0.00111		1893	0.03125	1893	0.0332765	1893	-0.00516
1895	-0.0111129	1895	-0.00371907	1895	-0.00154		1894	0.03082	1894	0.0326583	1894	-0.00496
1896	-0.0114781	1896	-0.00386687	1896	-0.00177		1895	0.03048	1895	0.0322402	1895	-0.00465
1897	-0.0118433	1897	-0.00401467	1897	-0.0018		1896	0.03015	1896	0.031922	1896	-0.00444
1898	-0.0121085	1898	-0.00406247	1898	-0.00248		1897	0.02981	1897	0.0317038	1897	-0.00414
1899	-0.0124738	1899	-0.00421027	1899	-0.00362		1898	0.02938	1898	0.0314856	1898	-0.00393
1900	-0.012639	1900	-0.00415808	1900	-0.00455		1899	0.02905	1899	0.0311675	1899	-0.00383
1901	-0.0128042	1901	-0.00410588	1901	-0.00539		1900	0.02861	1900	0.0308493	1900	-0.00362
1902	-0.0129694	1902	-0.00405368	1902	-0.00613		1901	0.02828	1901	0.0304311	1901	-0.00321
1903	-0.0130346	1903	-0.00390148	1903	-0.00677		1902	0.02795	1902	0.0299129	1902	-0.00271
1904	-0.0129999	1904	-0.00364928	1904	-0.00711		1903	0.02751	1903	0.0293948	1903	-0.0022
1905	-0.0129651	1905	-0.00339708	1905	-0.00724		1904	0.02678	1904	0.0287766	1904	-0.0017
1906	-0.0128303	1906	-0.00304489	1906	-0.00708		1905	0.02585	1905	0.0281584	1905	-0.00129
1907	-0.0126955	1907	-0.00269269	1907	-0.00662		1906	0.02481	1906	0.0276402	1906	-0.000883181
1908	-0.0125607	1908	-0.00234049	1908	-0.00586		1907	0.02378	1907	0.027122	1907	-0.000477112
1909	-0.012526	1909	-0.00208829	1909	-0.00489		1908	0.02295	1908	0.0267039	1908	-7.10429e-05
1910	-0.0125912	1910	-0.00193609	1910	-0.00373		1909	0.02221	1909	0.0262857	1909	0.000235026
1911	-0.0126564	1911	-0.00178389	1911	-0.00247		1910	0.02158	1910	0.0258675	1910	0.000441095
1912	-0.0127216	1912	-0.0016317	1912	-0.00131		1911	0.02095	1911	0.0252493	1911	0.000647164
1913	-0.0128868	1913	-0.0015795	1913	-4.51076e-05		1912	0.02021	1912	0.0244312	1912	0.000653233
1914	-0.0131521	1914	-0.0016273	1914	0.00102		1913	0.01948	1913	0.023713	1913	0.000659303
1915	-0.0134173	1915	-0.0016751	1915	0.00218		1914	0.01865	1914	0.0230948	1914	0.000765372
1916	-0.0137825	1916	-0.0018229	1916	0.00324		1915	0.01791	1915	0.0226766	1915	0.000771441
1917	-0.0142477	1917	-0.0020707	1917	0.0043		1916	0.01718	1916	0.0224584	1916	0.00077751
1918	-0.0147129	1918	-0.00231851	1918	0.00547		1917	0.01654	1917	0.0224403	1917	0.000683579
1919	-0.0151782	1919	-0.00256631	1919	0.00643		1918	0.01611	1918	0.0224221	1918	0.000589648
1920	-0.0156434	1920	-0.00281411	1920	0.00709		1919	0.01588	1919	0.0223039	1919	0.000595717
1921	-0.0162086	1921	-0.00316191	1921	0.00745		1920	0.01574	1920	0.0221857	1920	0.000801786
1922	-0.0166738	1922	-0.00340971	1922	0.00752		1921	0.01561	1921	0.0219676	1921	0.00101
1923	-0.017039	1923	-0.00355751	1923	0.00738		1922	0.01538	1922	0.0217494	1922	0.00121
1924	-0.0173043	1924	-0.00360532	1924	0.00694		1923	0.01504	1923	0.0215312	1923	0.00152
1925	-0.0174695	1925	-0.00355312	1925	0.0065		1924	0.01471	1924	0.021213	1924	0.00173
1926	-0.0175347	1926	-0.00340092	1926	0.00576		1925	0.01438	1925	0.0208949	1925	0.00203
1927	-0.0174999	1927	-0.00314872	1927	0.00483		1926	0.01414	1926	0.0205767	1926	0.00244
1928	-0.0172652	1928	-0.00269652	1928	0.00359		1927	0.01401	1927	0.0202585	1927	0.00284
1929	-0.0169304	1929	-0.00214432	1929	0.00233		1928	0.01388	1928	0.0200403	1928	0.00335
1930	-0.0164956	1930	-0.00149213	1930	0.00338		1929	0.01384	1929	0.0196221	1929	0.00386
1931	-0.0160608	1931	-0.000912873	1931	0.00443		1930	0.01361	1930	0.019204	1930	0.00426
1932	-0.015526	1932	-0.00105361	1932	0.00528		1931	0.01338	1931	0.0186858	1931	0.00467
1933	-0.0148913	1933	-0.00109435	1933	0.00583		1932	0.01304	1932	0.0181676	1932	0.00487
1934	-0.0143565	1934	-0.00123509	1934	0.00608		1933	0.01251	1933	0.0177494	1933	0.00508
1935	-0.0136217	1935	-0.00117583	1935	0.00613		1934	0.01208	1934	0.0173313	1934	0.00509
1936	-0.0129869	1936	-0.00121657	1936	0.00609		1935	0.01154	1935	0.0171131	1935	0.00489
1937	-0.0123521	1937	-0.00125731	1937	0.00584		1936	0.01111	1936	0.0167949	1936	0.0047
1938	-0.0116174	1938	-0.00119805	1938	0.00559		1937	0.01057	1937	0.0163767	1937	0.0045
1939	-0.0109826	1939	-0.00123879	1939	0.00514		1938	0.01014	1938	0.0159585	1938	0.00431
1940	-0.0101478	1940	-0.00107953	1940	0.00449		1939	0.00961	1939	0.0155404	1939	0.00412
1941	-0.00921302	1941	-0.000820271	1941	0.00394		1940	0.00917	1940	0.0153222	1940	0.00382
1942	-0.00807824	1942	-0.000361011	1942	0.00339		1941	0.00854	1941	0.015204	1941	0.00363
1943	-0.00694346	1943	9.82494e-05	1943	0.00294		1942	0.00791	1942	0.0152858	1942	0.00344
1944	-0.00580868	1944	0.00055751	1944	0.00249		1943	0.00727	1943	0.0151677	1943	0.00324
1945	-0.0046739	1945	0.00101677	1945	0.00194		1944	0.00664	1944	0.0151495	1944	0.00315
1946	-0.00353912	1946	0.00147603	1946	0.0012		1945	0.00621	1945	0.0150313	1945	0.00295
1947	-0.00250434	1947	0.00183529	1947	0.000646834		1946	0.00567	1946	0.0149131	1946	0.00266
1948	-0.00156956	1948	0.00209455	1948	9.78896e-05		1947	0.00514	1947	0.014795	1947	0.00227
1949	-0.00083478	1949	0.00215381	1949	-5.10552e-05		1948	0.00471	1948	0.0145768	1948	0.00197
1950	3.41061e-13	1950	0.00231307	1950	6.53699e-13		1949	0.00437	1949	0.0142586	1949	0.00168
1951	-0.000153903	1951	0.00237233	1951	-0.000730628		1950	0.00404	1950	0.0139404	1950	0.00148
1952	-0.000107806	1952	0.00263159	1952	-0.00116		1951	0.00371	1951	0.0138222	1951	0.00139
1953	-6.1709e-05	1953	0.00289085	1953	-0.00149		1952	0.00347	1952	0.0138041	1952	0.0014
1954	-1.5612e-05	1954	0.00315011	1954	-0.00172		1953	0.00314	1953	0.0137859	1953	0.0014
1955	-0.000169515	1955	0.00320937	1955	-0.00185		1954	0.00281	1954	0.0138677	1954	0.00131
1956	-0.000423418	1956	0.00316863	1956	-0.00188		1955	0.00257	1955	0.0139495	1955	0.00131
1957	-0.000977321	1957	0.00282789	1957	-0.00181		1956	0.00234	1956	0.0138314	1956	0.00132
1958	-0.00163122	1958	0.00238715	1958	-0.00165		1957	0.0021	1957	0.0137132	1957	0.00123
1959	-0.00228513	1959	0.00194641	1959	-0.00128		1958	0.00197	1958	0.013495	1958	0.000932411
1960	-0.00313903	1960	0.00130567	1960	-0.000706278		1959	0.00195	1959	0.0131768	1959	0.00063848
1961	-0.00399293	1961	0.000664933	1961	-0.000336906		1960	0.00193	1960	0.0128586	1960	0.000544549
1962	-0.00494684	1962	-7.58066e-05	1962	-0.000167534		1961	0.00201	1961	0.0125405	1961	0.000550618
1963	-0.00550074	1963	-0.000416546	1963	-0.000398162		1962	0.00199	1962	0.0122223	1962	0.000756688
1964	-0.00465464	1964	0.000649128	1964	-0.000728789		1963	0.00196	1963	0.0119041	1963	0.000962757
1965	-0.00120854	1965	0.00437112	1965	-0.000359417		1964	0.00194	1964	0.0114859	1964	0.00107
1966	0.00603755	1966	0.0118931	1966	0.00165		1965	0.00192	1965	0.0111678	1965	0.00107
1967	0.0176836	1967	0.0238151	1967	0.00604		1966	0.0019	1966	0.0107496	1966	0.000980964
1968	0.0335297	1968	0.0399371	1968	0.01332		1967	0.00178	1967	0.0103314	1967	0.000787033
1969	0.0528758	1969	0.0595591	1969	0.02321		1968	0.00186	1968	0.00991323	1968	0.000593102
1970	0.0748219	1970	0.0817811	1970	0.0352		1969	0.00184	1969	0.00939505	1969	0.000499171
1971	0.098568	1971	0.105803	1971	0.04889		1970	0.00181	1970	0.00887688	1970	0.00060524
1972	0.123414	1972	0.130925	1972	0.06338		1971	0.00189	1971	0.0083587	1971	0.000711309
1973	0.14896	1973	0.156747	1973	0.07847		1972	0.00187	1972	0.00804052	1972	0.000817378
1974	0.174806	1974	0.182869	1974	0.09395		1973	0.00175	1973	0.00782235	1973	0.000923447
1975	0.200652	1975	0.208991	1975	0.10954		1974	0.00153	1974	0.00770417	1974	0.000829517
1976	0.226299	1976	0.234913	1976	0.12523		1975	0.00111	1975	0.00758599	1975	0.000635586
1977	0.251045	1977	0.259935	1977	0.14112		1976	0.000685301	1976	0.00746781	1976	0.000541655
1978	0.274391	1978	0.283557	1978	0.15691		1977	0.000263855	1977	0.00744964	1977	0.000447724
1979	0.295237	1979	0.304679	1979	0.1721		1978	-0.000157591	1978	0.00743146	1978	0.000553793
1980	0.312083	1980	0.321801	1980	0.18568		1979	-0.000479037	1979	0.00751328	1979	0.000759862
1981	0.323929	1981	0.333923	1981	0.19657		1980	-0.000700483	1980	0.0076951	1980	0.00107
1982	0.330075	1982	0.340345	1982	0.20396		1981	-0.000921928	1981	0.00797693	1981	0.00117
1983	0.330721	1983	0.341267	1983	0.20765		1982	-0.00114	1982	0.00835875	1982	0.00128
1984	0.326567	1984	0.337389	1984	0.20784		1983	-0.00126	1983	0.00874057	1983	0.00128
1985	0.318613	1985	0.329711	1985	0.20512		1984	-0.00149	1984	0.0091224	1984	0.00119
1986	0.307859	1986	0.319233	1986	0.20021		1985	-0.00151	1985	0.00950422	1985	0.000996276
1987	0.294906	1987	0.306555	1987	0.1937		1986	-0.00153	1986	0.00968604	1986	0.000702346
1988	0.280452	1988	0.292377	1988	0.18589		1987	-0.00165	1987	0.00966786	1987	0.000408415
1989	0.264698	1989	0.276899	1989	0.17708		1988	-0.00167	1988	0.00954969	1988	0.000214484
1990	0.248244	1990	0.260721	1990	0.16737		1989	-0.00169	1989	0.00943151	1989	0.000120553
1991	0.23139	1991	0.244143	1991	0.15705		1990	-0.00161	1990	0.00921333	1990	2.66218e-05
1992	0.214836	1992	0.227865	1992	0.14654		1991	-0.00144	1991	0.00899515	1991	3.26909e-05
1993	0.198882	1993	0.212187	1993	0.13613		1992	-0.00116	1992	0.00877698	1992	-6.124e-05
1994	0.183628	1994	0.197209	1994	0.12602		1993	-0.000979278	1993	0.0085588	1993	-0.000355171
1995	0.169174	1995	0.183031	1995	0.11641		1994	-0.000900724	1994	0.00814062	1994	-0.000549102
1996	0.15562	1996	0.169753	1996	0.1073		1995	-0.00082217	1995	0.00752245	1995	-0.000643033
[truncated: 5,805 more rows]
