# Supplementary material for: Allosteric effects of the coupling cation in melibiose transporter MelB
Source: eLife. 2026 Jan 28;14:RP108335. doi: 10.7554/eLife.108335 (PMC12851581; doi:10.7554/eLife.108335)
Supplement: Figure 5—source data 1. [file elife-108335-fig5-data1.xlsx]

## Sheet: MelB_Na_summary
	Apo vs Na
			all position +1
	Protein State	Protein	Start	End	Sequence	Peptide Mass	RT (min)	Deut Time (sec)	maxD	Theor Uptake #D	#D	%D	Conf Interval (#D)	#Rep	Confidence	Stddev	p
Apo	MelB	MELB	1	9	SISMTTKLS	966.506	3.3167	0	7	0	0	0	n/a	1	High	0
	MelB	MELB	1	9	SISMTTKLS	966.506	3.3349	30	7	6.998	2.419	34.557	0.148	3	Medium	0.059
	MelB	MELB	1	9	SISMTTKLS	966.506	3.2778	300	7	7	2.729	38.985	0.329	3	Medium	0.132
	MelB	MELB	1	9	SISMTTKLS	966.506	3.3177	3000	7	7	2.918	41.693	0.18	3	Medium	0.072
	MelB	MELB	4	9	MTTKLS	679.357	1.8399	0	4	0	0	0	n/a	1	Medium	0
	MelB	MELB	4	9	MTTKLS	679.357	1.8236	30	4	3.998	0.158	3.955	0.008	3	Medium	0.003
	MelB	MELB	4	9	MTTKLS	679.357	1.8154	300	4	4	0.506	12.659	0.701	3	Medium	0.282
	MelB	MELB	4	9	MTTKLS	679.357	1.8249	3000	4	4	0.47	11.742	0.267	3	Medium	0.107
	MelB	MELB	4	10	MTTKLSY	842.421	3.2743	0	5	0	0	0	n/a	1	Medium	0
	MelB	MELB	4	10	MTTKLSY	842.421	3.3609	30	5	4.998	0.305	6.102	0.251	3	Medium	0.101
	MelB	MELB	4	10	MTTKLSY	842.421	3.3004	300	5	5	0.761	15.226	0.557	3	Medium	0.224
	MelB	MELB	4	10	MTTKLSY	842.421	3.3301	3000	5	5	0.767	15.338	0.062	3	Medium	0.025
	MelB	MELB	6	14	TKLSYGFGA	942.481	4.7218	0	7	0	0	0	n/a	1	High	0
	MelB	MELB	6	14	TKLSYGFGA	942.481	4.733	30	7	6.998	0.132	1.89	0.054	3	High	0.022
	MelB	MELB	6	14	TKLSYGFGA	942.481	4.686	300	7	7	0.298	4.26	0.074	3	High	0.03
	MelB	MELB	6	14	TKLSYGFGA	942.481	4.6826	3000	7	7	0.396	5.651	0.262	3	Medium	0.106
	MelB	MELB	11	18	GFGAFGKD	797.371	4.3908	0	6	0	0	0	n/a	1	Medium	0
	MelB	MELB	11	18	GFGAFGKD	797.371	4.439	30	6	6	0.07	1.174	0.045	3	Medium	0.018
	MelB	MELB	11	18	GFGAFGKD	797.371	4.3981	300	6	6	0.117	1.945	0.116	3	Medium	0.047
	MelB	MELB	11	18	GFGAFGKD	797.371	4.403	3000	6	6	0.164	2.732	0.116	3	Medium	0.047
	MelB	MELB	12	18	FGAFGKD	740.349	3.8434	0	5	0	0	0	n/a	1	Medium	0
	MelB	MELB	12	18	FGAFGKD	740.349	3.8345	30	5	5	0.109	2.189	0.075	3	Medium	0.03
	MelB	MELB	12	18	FGAFGKD	740.349	3.8294	300	5	5	0.178	3.559	0.06	3	Medium	0.024
	MelB	MELB	12	18	FGAFGKD	740.349	3.8255	3000	5	5	0.179	3.582	0.145	3	Medium	0.058
	MelB	MELB	15	19	FGKDF	612.291	3.5799	0	3	0	0	0	n/a	1	High	0
	MelB	MELB	15	19	FGKDF	612.291	3.5985	30	3	2.999	0.047	1.571	0.019	3	High	0.008
	MelB	MELB	15	19	FGKDF	612.291	3.5912	300	3	3	0.351	11.704	0.056	3	Medium	0.023
	MelB	MELB	15	19	FGKDF	612.291	3.5942	3000	3	3	0.311	10.383	0.272	3	Medium	0.11
	MelB	MELB	18	22	DFAIG	521.249	4.9601	0	3	0	0	0	n/a	1	Medium	0
	MelB	MELB	18	22	DFAIG	521.249	4.9271	30	3	2.964	0.179	5.976	0.463	3	Medium	0.186
	MelB	MELB	18	22	DFAIG	521.249	4.8886	300	3	3	0.534	17.807	0.36	3	Medium	0.145
	MelB	MELB	18	22	DFAIG	521.249	4.9188	3000	3	3	0.343	11.445	0.53	3	Medium	0.214
	MelB	MELB	20	25	AIGIVY	634.369	5.5528	0	4	0	0	0	n/a	1	Medium	0
	MelB	MELB	20	25	AIGIVY	634.369	5.5167	30	4	3.868	0.018	0.442	0.058	3	Medium	0.023
	MelB	MELB	20	25	AIGIVY	634.369	5.5033	300	4	4	0.595	14.869	0.401	3	Medium	0.162
	MelB	MELB	20	25	AIGIVY	634.369	5.5208	3000	4	4	0.406	10.141	0.399	3	Medium	0.161
	MelB	MELB	23	25	IVY	393.226	3.2056	0	1	0	0	0	n/a	1	Medium	0
	MelB	MELB	23	25	IVY	393.226	3.2001	30	1	0.999	0.04	4.043	0.165	3	Medium	0.066
	MelB	MELB	23	25	IVY	393.226	3.1784	300	1	1	0.081	8.073	0.072	3	Medium	0.029
	MelB	MELB	23	25	IVY	393.226	3.1556	3000	1	1	0.096	9.62	0.228	3	Medium	0.092
	MelB	MELB	23	28	IVYMYL	800.414	8.4439	0	4	0	0	0	n/a	1	High	0
	MelB	MELB	23	28	IVYMYL	800.414	8.4647	30	4	3.994	-0.002	-0.043	0.011	3	High	0.004
	MelB	MELB	23	28	IVYMYL	800.414	8.4351	300	4	4	0.14	3.511	0.133	3	High	0.053
	MelB	MELB	23	28	IVYMYL	800.414	8.4446	3000	4	4	0.135	3.364	0.231	3	High	0.093
	MelB	MELB	26	28	MYL	425.198	5.5581	0	1	0	0	0	n/a	1	High	0
	MelB	MELB	26	28	MYL	425.198	5.5417	30	1	0.995	0.007	0.698	0.004	3	High	0.002
	MelB	MELB	26	28	MYL	425.198	5.4908	300	1	1	0.001	0.105	0.005	3	High	0.002
	MelB	MELB	26	28	MYL	425.198	5.4819	3000	1	1	-0.003	-0.325	0.006	3	High	0.002
	MelB	MELB	29	31	MYY	475.178	4.2235	0	1	0	0	0	n/a	1	Medium	0
	MelB	MELB	29	31	MYY	475.178	4.1439	30	1	1	0.014	1.444	0.016	3	Medium	0.006
	MelB	MELB	29	31	MYY	475.178	4.0995	300	1	1	0.01	1.047	0.021	3	Medium	0.008
	MelB	MELB	29	31	MYY	475.178	4.1154	3000	1	1	0.046	4.589	0.066	3	Medium	0.027
	MelB	MELB	29	34	MYYYTD	854.316	4.5688	0	4	0	0	0	n/a	1	High	0
	MelB	MELB	29	34	MYYYTD	854.316	4.5851	30	4	4	0.038	0.961	0.018	3	High	0.007
	MelB	MELB	29	34	MYYYTD	854.316	4.5629	300	4	4	0.087	2.172	0.02	3	High	0.008
	MelB	MELB	29	34	MYYYTD	854.316	4.5677	3000	4	4	0.07	1.76	0.06	3	High	0.024
	MelB	MELB	35	46	VVGLSVGLVGTL	1112.68	8.2186	0	10	0	0	0	n/a	1	Medium	0
	MelB	MELB	35	46	VVGLSVGLVGTL	1112.68	8.2886	30	10	9.885	0.268	2.678	0.119	3	Medium	0.048
	MelB	MELB	35	46	VVGLSVGLVGTL	1112.68	8.1404	300	10	10	0.656	6.564	0.382	3	Medium	0.154
	MelB	MELB	35	46	VVGLSVGLVGTL	1112.68	8.2093	3000	10	10	0.672	6.719	0.339	3	Medium	0.136
	MelB	MELB	42	46	LVGTL	501.316	3.9808	0	3	0	0	0	n/a	1	Medium	0
	MelB	MELB	42	46	LVGTL	501.316	3.9818	30	3	2.999	0.008	0.252	0.017	3	Medium	0.007
	MelB	MELB	42	46	LVGTL	501.316	3.9428	300	3	3	0.015	0.496	0.018	3	Medium	0.007
	MelB	MELB	42	46	LVGTL	501.316	3.9574	3000	3	3	0.025	0.826	0.017	3	Medium	0.007
	MelB	MELB	47	51	FLVAR	604.37	2.6827	0	3	0	0	0	n/a	1	Medium	0
	MelB	MELB	47	51	FLVAR	604.37	2.7348	30	3	2.888	0.01	0.344	0.013	3	High	0.005
	MelB	MELB	47	51	FLVAR	604.37	2.6789	300	3	3	0.005	0.174	0.019	3	High	0.007
	MelB	MELB	47	51	FLVAR	604.37	2.7086	3000	3	3	0.014	0.471	0.008	3	High	0.003
	MelB	MELB	47	53	FLVARIW	903.533	7.7147	0	5	0	0	0	n/a	1	High	0
	MelB	MELB	47	53	FLVARIW	903.533	7.7152	30	5	4.867	0.023	0.453	0.003	3	High	0.001
	MelB	MELB	47	53	FLVARIW	903.533	7.6547	300	5	5	0.032	0.641	0.01	3	High	0.004
	MelB	MELB	47	53	FLVARIW	903.533	7.6557	3000	5	5	0.027	0.55	0.014	3	High	0.006
	MelB	MELB	48	53	LVARIW	756.465	5.7224	0	4	0	0	0	n/a	1	High	0
	MelB	MELB	48	53	LVARIW	756.465	5.7389	30	4	3.979	0.015	0.375	0.021	3	Medium	0.008
	MelB	MELB	48	53	LVARIW	756.465	5.7145	300	4	4	0.019	0.48	0.044	3	Medium	0.018
	MelB	MELB	48	53	LVARIW	756.465	5.6969	3000	4	4	0.015	0.369	0.009	3	Medium	0.004
	MelB	MELB	49	53	VARIW	643.381	4.7377	0	3	0	0	0	n/a	1	High	0
	MelB	MELB	49	53	VARIW	643.381	4.7667	30	3	2.979	0.024	0.788	0.004	3	High	0.002
	MelB	MELB	49	53	VARIW	643.381	4.6895	300	3	3	0.022	0.738	0.008	3	High	0.003
	MelB	MELB	49	53	VARIW	643.381	4.6933	3000	3	3	0.017	0.58	0.022	3	High	0.009
	MelB	MELB	52	61	IWDAINDPIM	1186.57	8.1592	0	7	0	0	0	n/a	1	High	0
	MelB	MELB	52	61	IWDAINDPIM	1186.57	8.183	30	7	6.817	0.046	0.664	0.011	3	High	0.004
	MelB	MELB	52	61	IWDAINDPIM	1186.57	8.139	300	7	7	0.106	1.51	0.053	3	High	0.021
	MelB	MELB	52	61	IWDAINDPIM	1186.57	8.1361	3000	7	7	0.084	1.203	0.094	3	High	0.038
	MelB	MELB	52	66	IWDAINDPIMGWIVN	1755.87	10.943	0	12	0	0	0	n/a	1	High	0
	MelB	MELB	52	66	IWDAINDPIMGWIVN	1755.87	10.9401	30	12	11.617	0.08	0.666	0.027	3	Medium	0.011
	MelB	MELB	52	66	IWDAINDPIMGWIVN	1755.87	10.8917	300	12	12	0.204	1.696	0.161	3	High	0.065
	MelB	MELB	52	66	IWDAINDPIMGWIVN	1755.87	10.8816	3000	12	12	0.207	1.721	0.231	3	High	0.093
	MelB	MELB	54	65	DAINDPIMGWIV	1342.66	10.5697	0	9	0	0	0	n/a	1	High	0
	MelB	MELB	54	65	DAINDPIMGWIV	1342.66	10.5821	30	9	8.617	0.057	0.634	0.033	3	High	0.013
	MelB	MELB	54	65	DAINDPIMGWIV	1342.66	10.5298	300	9	9	0.142	1.578	0.08	3	High	0.032
	MelB	MELB	54	65	DAINDPIMGWIV	1342.66	10.5602	3000	9	9	0.109	1.214	0.127	3	High	0.051
	MelB	MELB	58	65	DPIMGWIV	929.468	9.8469	0	6	0	0	0	n/a	1	High	0
	MelB	MELB	58	65	DPIMGWIV	929.468	9.8524	30	6	5.653	0.037	0.619	0.027	3	High	0.011
	MelB	MELB	58	65	DPIMGWIV	929.468	9.7632	300	6	6	0.42	7.002	1.481	3	Medium	0.596
	MelB	MELB	58	65	DPIMGWIV	929.468	9.8103	3000	6	6	0.055	0.913	0.081	3	High	0.033
	MelB	MELB	67	76	ATRSRWGKFK	1235.69	1.782	0	8	0	0	0	n/a	1	Medium	0
	MelB	MELB	67	76	ATRSRWGKFK	1235.69	1.8254	30	8	8	0.18	2.244	0.131	3	Medium	0.053
	MelB	MELB	67	76	ATRSRWGKFK	1235.69	1.8101	300	8	8	0.423	5.291	0.347	3	Medium	0.14
	MelB	MELB	67	76	ATRSRWGKFK	1235.69	1.9026	3000	8	8	0.448	5.595	0.383	3	Medium	0.154
	MelB	MELB	70	76	SRWGKFK	907.503	2.2042	0	5	0	0	0	n/a	1	Medium	0
	MelB	MELB	70	76	SRWGKFK	907.503	2.2655	30	5	5	0.094	1.876	0.004	3	Medium	0.002
	MelB	MELB	70	76	SRWGKFK	907.503	2.2263	300	5	5	0.111	2.218	0.151	3	Medium	0.061
	MelB	MELB	70	76	SRWGKFK	907.503	2.3291	3000	5	5	0.114	2.272	0.191	3	Medium	0.077
	MelB	MELB	72	76	WGKFK	664.37	2.7275	0	3	0	0	0	n/a	1	Medium	0
	MelB	MELB	72	76	WGKFK	664.37	2.7385	30	3	3	0.062	2.057	0.017	3	Medium	0.007
	MelB	MELB	72	76	WGKFK	664.37	2.6878	300	3	3	0.156	5.2	0.054	3	Medium	0.022
	MelB	MELB	72	76	WGKFK	664.37	2.7711	3000	3	3	0.227	7.565	0.201	3	Medium	0.081
	MelB	MELB	75	80	FKPWIL	802.474	8.3898	0	3	0	0	0	n/a	1	High	0
	MelB	MELB	75	80	FKPWIL	802.474	8.4185	30	3	2.845	0.024	0.815	0.037	3	High	0.015
	MelB	MELB	75	80	FKPWIL	802.474	8.3582	300	3	3	0.124	4.147	0.135	3	High	0.054
	MelB	MELB	75	80	FKPWIL	802.474	8.3194	3000	3	3	0.208	6.945	0.256	3	High	0.103
	MelB	MELB	81	88	IGTLTNSL	817.455	5.0497	0	6	0	0	0	n/a	1	Medium	0
	MelB	MELB	81	88	IGTLTNSL	817.455	5.046	30	6	5.999	0.034	0.574	0.013	3	Medium	0.005
	MelB	MELB	81	88	IGTLTNSL	817.455	4.9932	300	6	6	0.087	1.454	0.067	3	High	0.027
	MelB	MELB	81	88	IGTLTNSL	817.455	4.9991	3000	6	6	0.084	1.393	0.086	3	High	0.035
	MelB	MELB	81	90	IGTLTNSLVL	1029.61	7.267	0	8	0	0	0	n/a	1	Medium	0
	MelB	MELB	81	90	IGTLTNSLVL	1029.61	7.3062	30	8	7.855	0.022	0.27	0.024	3	Medium	0.01
	MelB	MELB	81	90	IGTLTNSLVL	1029.61	7.2577	300	8	8	0.072	0.896	0.066	3	Medium	0.026
	MelB	MELB	81	90	IGTLTNSLVL	1029.61	7.3204	3000	8	8	0.067	0.843	0.07	3	Medium	0.028
	MelB	MELB	92	97	LLFSAH	686.375	4.733	0	4	0	0	0	n/a	1	Medium	0
	MelB	MELB	92	97	LLFSAH	686.375	6.8106	30	4	3.998	3.435	85.874	0.007	3	Medium	0.003
	MelB	MELB	92	97	LLFSAH	686.375	6.7721	300	4	4	3.449	86.221	0.014	3	Medium	0.006
	MelB	MELB	92	97	LLFSAH	686.375	6.7287	3000	4	4	3.449	86.234	0.01	3	Medium	0.004
	MelB	MELB	92	98	LLFSAHL	799.459	6.7833	0	5	0	0	0	n/a	1	Medium	0
	MelB	MELB	92	98	LLFSAHL	799.459	6.7884	30	5	4.998	0.008	0.162	0.102	3	Medium	0.041
	MelB	MELB	92	98	LLFSAHL	799.459	6.7425	300	5	5	0.05	0.995	0.082	3	Medium	0.033
	MelB	MELB	92	98	LLFSAHL	799.459	6.7445	3000	5	5	0.035	0.695	0.065	3	Medium	0.026
	MelB	MELB	93	99	LFSAHLF	833.444	7.2355	0	5	0	0	0	n/a	1	Medium	0
	MelB	MELB	93	99	LFSAHLF	833.444	7.249	30	5	4.998	0.017	0.333	0.018	3	Medium	0.007
	MelB	MELB	93	99	LFSAHLF	833.444	7.1917	300	5	5	0.069	1.376	0.025	3	Medium	0.01
	MelB	MELB	93	99	LFSAHLF	833.444	7.1809	3000	5	5	0.042	0.849	0.096	3	Medium	0.039
	MelB	MELB	94	99	FSAHLF	720.36	6.1753	0	4	0	0	0	n/a	1	High	0
	MelB	MELB	94	99	FSAHLF	720.36	6.1826	30	4	3.998	0.031	0.786	0.011	3	Medium	0.004
	MelB	MELB	94	99	FSAHLF	720.36	6.1181	300	4	4	0.074	1.842	0.044	3	Medium	0.018
	MelB	MELB	94	99	FSAHLF	720.36	6.1179	3000	4	4	0.06	1.491	0.054	3	High	0.022
	MelB	MELB	98	106	LFEGTAQVV	962.507	5.118	0	7	0	0	0	n/a	1	Medium	0
	MelB	MELB	98	106	LFEGTAQVV	962.507	5.1257	30	7	6.92	0.07	0.999	0.066	3	Medium	0.027
	MelB	MELB	98	106	LFEGTAQVV	962.507	5.1357	300	7	7	0.188	2.688	0.264	3	Medium	0.106
	MelB	MELB	98	106	LFEGTAQVV	962.507	5.1224	3000	7	7	0.208	2.977	0.158	3	Medium	0.064
	MelB	MELB	100	106	EGTAQVV	702.355	2.2568	0	5	0	0	0	n/a	1	Medium	0
	MelB	MELB	100	106	EGTAQVV	702.355	2.2797	30	5	4.92	-0.023	-0.47	0.076	3	Medium	0.03
	MelB	MELB	100	106	EGTAQVV	702.355	2.2582	300	5	5	0.137	2.733	0.207	3	Medium	0.083
	MelB	MELB	100	106	EGTAQVV	702.355	2.2845	3000	5	5	0.137	2.743	0.071	3	Medium	0.029
	MelB	MELB	100	109	EGTAQVVFVC	1051.5	6.4519	0	8	0	0	0	n/a	1	High	0
	MelB	MELB	100	109	EGTAQVVFVC	1051.5	6.4228	30	8	7.903	-0.019	-0.237	0.06	3	High	0.024
	MelB	MELB	100	109	EGTAQVVFVC	1051.5	6.3979	300	8	8	0.123	1.536	0.082	3	High	0.033
	MelB	MELB	100	109	EGTAQVVFVC	1051.5	6.3936	3000	8	8	0.079	0.988	0.157	3	High	0.063
	MelB	MELB	119	122	YTIM	526.246	4.8279	0	2	0	0	0	n/a	1	High	0
	MelB	MELB	119	122	YTIM	526.246	4.8359	30	2	1.995	0.014	0.72	0.014	3	High	0.006
	MelB	MELB	119	122	YTIM	526.246	4.8048	300	2	2	0.041	2.066	0.065	3	High	0.026
	MelB	MELB	119	122	YTIM	526.246	4.7896	3000	2	2	0.029	1.462	0.03	3	High	0.012
	MelB	MELB	120	129	TIMDIPFWSL	1221.61	11.5535	0	7	0	0	0	n/a	1	High	0
	MelB	MELB	120	129	TIMDIPFWSL	1221.61	11.5767	30	7	6.889	0.038	0.544	0.025	3	High	0.01
	MelB	MELB	120	129	TIMDIPFWSL	1221.61	11.5147	300	7	7	0.175	2.494	0.111	3	High	0.045
	MelB	MELB	120	129	TIMDIPFWSL	1221.61	11.5042	3000	7	7	0.132	1.889	0.22	3	High	0.089
	MelB	MELB	123	129	DIPFWSL	876.438	10.3845	0	4	0	0	0	n/a	1	Medium	0
	MelB	MELB	123	129	DIPFWSL	876.438	10.4511	30	4	3.997	0.024	0.598	0.014	3	Medium	0.005
	MelB	MELB	123	129	DIPFWSL	876.438	10.3703	300	4	4	0.096	2.396	0.074	3	Medium	0.03
	MelB	MELB	123	129	DIPFWSL	876.438	10.349	3000	4	4	0.059	1.485	0.091	3	Medium	0.037
	MelB	MELB	124	129	IPFWSL	761.411	10.0469	0	4	0	0	0	n/a	1	High	0
	MelB	MELB	124	129	IPFWSL	761.411	10.0227	30	4	3.997	0.027	0.685	0.018	3	High	0.007
	MelB	MELB	124	129	IPFWSL	761.411	9.9749	300	4	4	0.127	3.183	0.083	3	High	0.033
	MelB	MELB	124	129	IPFWSL	761.411	9.9544	3000	4	4	0.088	2.206	0.174	3	High	0.07
	MelB	MELB	130	135	VPTITL	642.395	6.0491	0	4	0	0	0	n/a	1	Medium	0
	MelB	MELB	130	135	VPTITL	642.395	4.7667	30	4	3.994	1.189	29.736	0.002	3	Medium	0.001
	MelB	MELB	130	135	VPTITL	642.395	4.6895	300	4	4	1.188	29.69	0.007	3	Medium	0.003
	MelB	MELB	130	135	VPTITL	642.395	4.6933	3000	4	4	1.183	29.573	0.022	3	Medium	0.009
	MelB	MELB	130	137	VPTITLDK	885.517	3.6374	0	6	0	0	0	n/a	1	Medium	0
	MelB	MELB	130	137	VPTITLDK	885.517	3.623	30	6	5.994	0.209	3.491	0.062	3	Medium	0.025
	MelB	MELB	130	137	VPTITLDK	885.517	3.5999	300	6	6	0.345	5.752	0.153	3	Medium	0.061
	MelB	MELB	130	137	VPTITLDK	885.517	3.5819	3000	6	6	0.424	7.07	0.365	3	Medium	0.147
	MelB	MELB	136	149	DKREREQLVPFPRF	1815.97	5.9509	0	10	0	0	0	n/a	1	High	0
	MelB	MELB	136	149	DKREREQLVPFPRF	1815.97	6.0029	30	10	9.885	0.465	4.653	0.036	3	High	0.015
	MelB	MELB	136	149	DKREREQLVPFPRF	1815.97	5.8913	300	10	10	0.903	9.029	0.327	3	Medium	0.132
	MelB	MELB	136	149	DKREREQLVPFPRF	1815.97	5.9179	3000	10	10	1.567	15.666	1.018	3	Medium	0.41
	MelB	MELB	138	149	REREQLVPFPRF	1572.85	6.1247	0	8	0	0	0	n/a	1	High	0
	MelB	MELB	138	149	REREQLVPFPRF	1572.85	6.0843	30	8	7.885	0.28	3.505	0.051	3	High	0.02
	MelB	MELB	138	149	REREQLVPFPRF	1572.85	6.0353	300	8	8	0.575	7.185	0.242	3	Medium	0.097
	MelB	MELB	138	149	REREQLVPFPRF	1572.85	6.023	3000	8	8	0.935	11.681	0.545	3	Medium	0.22
	MelB	MELB	139	149	EREQLVPFPRF	1416.75	6.9006	0	7	0	0	0	n/a	1	Medium	0
	MelB	MELB	139	149	EREQLVPFPRF	1416.75	6.8564	30	7	6.885	0.317	4.531	0.048	3	Medium	0.019
	MelB	MELB	139	149	EREQLVPFPRF	1416.75	6.821	300	7	7	0.602	8.605	0.184	3	Medium	0.074
	MelB	MELB	139	149	EREQLVPFPRF	1416.75	6.7991	3000	7	7	1.09	15.572	0.672	3	Medium	0.271
	MelB	MELB	139	150	EREQLVPFPRFF	1563.82	8.3578	0	8	0	0	0	n/a	1	Medium	0
	MelB	MELB	139	150	EREQLVPFPRFF	1563.82	8.3879	30	8	7.885	0.33	4.128	0.095	3	Medium	0.038
	MelB	MELB	139	150	EREQLVPFPRFF	1563.82	8.3262	300	8	8	0.656	8.196	0.184	3	Medium	0.074
	MelB	MELB	139	150	EREQLVPFPRFF	1563.82	8.3357	3000	8	8	1.095	13.693	0.369	3	Medium	0.148
	MelB	MELB	140	149	REQLVPFPRF	1287.71	6.8248	0	6	0	0	0	n/a	1	High	0
	MelB	MELB	140	149	REQLVPFPRF	1287.71	6.8021	30	6	5.885	0.228	3.796	0.118	3	High	0.048
	MelB	MELB	140	149	REQLVPFPRF	1287.71	6.7478	300	6	6	0.471	7.857	0.223	3	Medium	0.09
	MelB	MELB	140	149	REQLVPFPRF	1287.71	6.7971	3000	6	6	0.595	9.91	0.443	3	Medium	0.178
	MelB	MELB	141	149	EQLVPFPRF	1131.61	7.752	0	5	0	0	0	n/a	1	Medium	0
	MelB	MELB	141	149	EQLVPFPRF	1131.61	7.7264	30	5	4.885	0.221	4.426	0.045	3	Medium	0.018
	MelB	MELB	141	149	EQLVPFPRF	1131.61	7.6814	300	5	5	0.412	8.239	0.15	3	Medium	0.061
	MelB	MELB	141	149	EQLVPFPRF	1131.61	7.676	3000	5	5	0.691	13.826	0.351	3	Medium	0.141
	MelB	MELB	141	150	EQLVPFPRFF	1278.68	9.3429	0	6	0	0	0	n/a	1	High	0
	MelB	MELB	141	150	EQLVPFPRFF	1278.68	9.2989	30	6	5.885	0.247	4.118	0.054	3	Medium	0.022
	MelB	MELB	141	150	EQLVPFPRFF	1278.68	9.2353	300	6	6	0.457	7.614	0.186	3	Medium	0.075
	MelB	MELB	141	150	EQLVPFPRFF	1278.68	9.3005	3000	6	6	0.734	12.238	0.339	3	Medium	0.136
	MelB	MELB	142	149	QLVPFPRF	1002.57	7.6458	0	4	0	0	0	n/a	1	High	0
	MelB	MELB	142	149	QLVPFPRF	1002.57	7.6645	30	4	3.885	0.132	3.295	0.026	3	High	0.01
	MelB	MELB	142	149	QLVPFPRF	1002.57	7.6231	300	4	4	0.272	6.809	0.152	3	High	0.061
	MelB	MELB	142	149	QLVPFPRF	1002.57	7.6076	3000	4	4	0.436	10.899	0.289	3	Medium	0.116
	MelB	MELB	143	149	LVPFPRF	874.506	7.4483	0	3	0	0	0	n/a	1	Medium	0
	MelB	MELB	143	149	LVPFPRF	874.506	7.5108	30	3	2.997	0.1	3.341	0.013	3	Medium	0.005
	MelB	MELB	143	149	LVPFPRF	874.506	7.29	300	3	3	0.222	7.407	0.114	3	Medium	0.046
	MelB	MELB	143	149	LVPFPRF	874.506	7.309	3000	3	3	0.361	12.029	0.231	3	Medium	0.093
	MelB	MELB	150	155	FASLAG	564.291	3.6697	0	4	0	0	0	n/a	1	Medium	0
	MelB	MELB	150	155	FASLAG	564.291	3.7072	30	4	4	0.244	6.104	0.156	3	Medium	0.063
	MelB	MELB	150	155	FASLAG	564.291	3.6579	300	4	4	0.155	3.864	0.114	3	Medium	0.046
	MelB	MELB	150	155	FASLAG	564.291	3.6542	3000	4	4	0.698	17.459	0.194	3	Medium	0.078
	MelB	MELB	153	158	LAGFVT	606.338	5.0443	0	4	0	0	0	n/a	1	Medium	0
	MelB	MELB	153	158	LAGFVT	606.338	5.0246	30	4	3.983	0.133	3.314	0.045	3	Medium	0.018
	MelB	MELB	153	158	LAGFVT	606.338	4.9801	300	4	4	0.25	6.262	0.096	3	Medium	0.039
	MelB	MELB	153	158	LAGFVT	606.338	4.9764	3000	4	4	0.563	14.065	0.189	3	Medium	0.076
	MelB	MELB	154	168	AGFVTAGITLPFVSY	1541.81	9.8362	0	12	0	0	0	n/a	1	High	0
	MelB	MELB	154	168	AGFVTAGITLPFVSY	1541.81	9.8522	30	12	11.956	0.282	2.35	0.112	3	High	0.045
	MelB	MELB	154	168	AGFVTAGITLPFVSY	1541.81	9.7973	300	12	12	0.579	4.824	0.248	3	High	0.1
	MelB	MELB	154	168	AGFVTAGITLPFVSY	1541.81	9.847	3000	12	12	0.959	7.99	0.492	3	Medium	0.198
	MelB	MELB	156	163	FVTAGITL	820.47	6.8511	0	6	0	0	0	n/a	1	Medium	0
	MelB	MELB	156	163	FVTAGITL	820.47	6.8596	30	6	5.992	-0.004	-0.064	0.132	3	Medium	0.053
	MelB	MELB	156	163	FVTAGITL	820.47	6.8491	300	6	6	0.131	2.19	0.007	3	Medium	0.003
	MelB	MELB	156	163	FVTAGITL	820.47	6.853	3000	6	6	0.198	3.306	0.364	3	Medium	0.147
	MelB	MELB	157	168	VTAGITLPFVSY	1266.69	8.7686	0	9	0	0	0	n/a	1	Medium	0
	MelB	MELB	157	168	VTAGITLPFVSY	1266.69	8.7307	30	9	8.973	0.129	1.428	0.044	3	Medium	0.018
	MelB	MELB	157	168	VTAGITLPFVSY	1266.69	8.7042	300	9	9	0.323	3.591	0.158	3	Medium	0.064
	MelB	MELB	157	168	VTAGITLPFVSY	1266.69	8.7045	3000	9	9	0.426	4.738	0.369	3	Medium	0.148
	MelB	MELB	159	168	AGITLPFVSY	1066.57	8.8162	0	7	0	0	0	n/a	1	High	0
	MelB	MELB	159	168	AGITLPFVSY	1066.57	8.8207	30	7	6.973	0.135	1.927	0.031	3	High	0.013
	MelB	MELB	159	168	AGITLPFVSY	1066.57	8.748	300	7	7	0.309	4.412	0.163	3	High	0.066
	MelB	MELB	159	168	AGITLPFVSY	1066.57	8.7431	3000	7	7	0.517	7.391	0.282	3	Medium	0.113
	MelB	MELB	169	177	VGGADRGFG	834.398	2.3466	0	7	0	0	0	n/a	1	Medium	0
	MelB	MELB	169	177	VGGADRGFG	834.398	2.4246	30	7	7	-0.058	-0.832	0.033	3	Medium	0.013
	MelB	MELB	169	177	VGGADRGFG	834.398	2.3839	300	7	7	0.021	0.294	0.102	3	Medium	0.041
	MelB	MELB	169	177	VGGADRGFG	834.398	2.423	3000	7	7	0.041	0.588	0.168	3	Medium	0.067
	MelB	MELB	169	180	VGGADRGFGFQM	1240.57	6.6104	0	10	0	0	0	n/a	1	Medium	0
	MelB	MELB	169	180	VGGADRGFGFQM	1240.57	6.6044	30	10	10	0.105	1.054	0.019	3	Medium	0.008
	MelB	MELB	169	180	VGGADRGFGFQM	1240.57	6.5777	300	10	10	0.248	2.477	0.177	3	Medium	0.071
	MelB	MELB	169	180	VGGADRGFGFQM	1240.57	6.5581	3000	10	10	0.25	2.504	0.371	3	Medium	0.149
	MelB	MELB	174	180	RGFGFQM	841.39	6.5103	0	5	0	0	0	n/a	1	Medium	0
	MelB	MELB	174	180	RGFGFQM	841.39	6.5061	30	5	5	0.02	0.391	0.019	3	Medium	0.008
	MelB	MELB	174	180	RGFGFQM	841.39	6.4633	300	5	5	0.072	1.435	0.057	3	Medium	0.023
	MelB	MELB	174	180	RGFGFQM	841.39	6.4683	3000	5	5	0.044	0.87	0.109	3	Medium	0.044
	MelB	MELB	184	187	VLIA	414.284	3.3589	0	2	0	0	0	n/a	1	Medium	0
	MelB	MELB	184	187	VLIA	414.284	3.4123	30	2	1.871	-0.001	-0.04	0.007	3	Medium	0.003
	MelB	MELB	184	187	VLIA	414.284	3.3518	300	2	2	-0.003	-0.132	0.021	3	Medium	0.008
	MelB	MELB	184	187	VLIA	414.284	3.3619	3000	2	2	-0.002	-0.087	0.001	3	Medium	0.001
	MelB	MELB	186	191	IAFFIA	680.39	8.6823	0	4	0	0	0	n/a	1	Medium	0
	MelB	MELB	186	191	IAFFIA	680.39	8.6814	30	4	3.979	0.006	0.151	0.012	3	Medium	0.005
	MelB	MELB	186	191	IAFFIA	680.39	8.6612	300	4	4	0.005	0.125	0.023	3	Medium	0.009
	MelB	MELB	186	191	IAFFIA	680.39	8.6284	3000	4	4	0.015	0.374	0.008	3	Medium	0.003
	MelB	MELB	190	198	IASTIVTLR	972.597	3.9385	0	7	0	0	0	n/a	1	Medium	0
	MelB	MELB	190	198	IASTIVTLR	972.597	3.8808	30	7	6.871	0.056	0.8	0.155	3	Medium	0.062
	MelB	MELB	190	198	IASTIVTLR	972.597	3.8486	300	7	7	0.092	1.311	0.062	3	Medium	0.025
	MelB	MELB	190	198	IASTIVTLR	972.597	3.8394	3000	7	7	0.11	1.567	0.18	3	Medium	0.072
	MelB	MELB	192	198	STIVTLR	788.476	3.0198	0	5	0	0	0	n/a	1	Medium	0
	MelB	MELB	192	198	STIVTLR	788.476	3.0214	30	5	4.871	0.04	0.791	0.009	3	Medium	0.004
	MelB	MELB	192	198	STIVTLR	788.476	3.0106	300	5	5	0.09	1.802	0.05	3	Medium	0.02
	MelB	MELB	192	198	STIVTLR	788.476	3.027	3000	5	5	0.069	1.383	0.065	3	Medium	0.026
	MelB	MELB	192	199	STIVTLRN	902.519	2.7117	0	6	0	0	0	n/a	1	Medium	0
	MelB	MELB	192	199	STIVTLRN	902.519	2.7596	30	6	5.871	0.167	2.786	0.088	3	Medium	0.035
	MelB	MELB	192	199	STIVTLRN	902.519	2.6948	300	6	6	0.173	2.889	0.194	3	Medium	0.078
	MelB	MELB	192	199	STIVTLRN	902.519	2.6838	3000	6	6	0.16	2.673	0.221	3	Medium	0.089
	MelB	MELB	192	200	STIVTLRNV	1001.59	4.4955	0	7	0	0	0	n/a	1	Medium	0
	MelB	MELB	192	200	STIVTLRNV	1001.59	4.4971	30	7	6.87	0.058	0.828	0.025	3	Medium	0.01
	MelB	MELB	192	200	STIVTLRNV	1001.59	4.4418	300	7	7	0.171	2.438	0.075	3	Medium	0.03
	MelB	MELB	192	200	STIVTLRNV	1001.59	4.4382	3000	7	7	0.156	2.232	0.216	3	Medium	0.087
	MelB	MELB	192	201	STIVTLRNVH	1138.65	2.8416	0	8	0	0	0	n/a	1	Medium	0
	MelB	MELB	192	201	STIVTLRNVH	1138.65	2.8516	30	8	7.87	0.038	0.48	0.027	3	Medium	0.011
	MelB	MELB	192	201	STIVTLRNVH	1138.65	2.7882	300	8	8	0.137	1.715	0.085	3	Medium	0.034
	MelB	MELB	192	201	STIVTLRNVH	1138.65	2.8167	3000	8	8	0.106	1.327	0.163	3	Medium	0.066
	MelB	MELB	192	203	STIVTLRNVHEV	1366.76	3.9623	0	10	0	0	0	n/a	1	High	0
	MelB	MELB	192	203	STIVTLRNVHEV	1366.76	3.9534	30	10	9.792	0.096	0.964	0.024	3	High	0.01
	MelB	MELB	192	203	STIVTLRNVHEV	1366.76	3.911	300	10	10	0.23	2.296	0.28	3	High	0.113
	MelB	MELB	192	203	STIVTLRNVHEV	1366.76	3.9039	3000	10	10	0.282	2.822	0.336	3	High	0.135
	MelB	MELB	192	204	STIVTLRNVHEVY	1529.82	4.5582	0	11	0	0	0	n/a	1	Medium	0
	MelB	MELB	192	204	STIVTLRNVHEVY	1529.82	4.534	30	11	10.791	-0.216	-1.96	0.006	3	High	0.003
	MelB	MELB	192	204	STIVTLRNVHEVY	1529.82	4.4821	300	11	11	0.055	0.496	0.298	3	Medium	0.12
	MelB	MELB	192	204	STIVTLRNVHEVY	1529.82	4.4895	3000	11	11	0.065	0.595	0.487	3	Medium	0.196
	MelB	MELB	194	197	IVTL	444.295	4.5424	0	2	0	0	0	n/a	1	Medium	0
	MelB	MELB	194	197	IVTL	444.295	5.481	30	2	1.999	0.079	3.935	0.011	3	Medium	0.004
	MelB	MELB	194	197	IVTL	444.295	5.421	300	2	2	0.086	4.28	0.004	3	Medium	0.002
	MelB	MELB	194	197	IVTL	444.295	5.4169	3000	2	2	0.078	3.889	0.015	3	Medium	0.006
	MelB	MELB	194	198	IVTLR	600.396	2.299	0	3	0	0	0	n/a	1	Medium	0
	MelB	MELB	194	198	IVTLR	600.396	2.3328	30	3	2.999	0.004	0.147	0.014	3	Medium	0.006
	MelB	MELB	194	198	IVTLR	600.396	2.2935	300	3	3	0.034	1.145	0.044	3	Medium	0.018
	MelB	MELB	194	198	IVTLR	600.396	2.3431	3000	3	3	0.018	0.589	0.045	3	Medium	0.018
	MelB	MELB	194	199	IVTLRN	714.439	2.0768	0	4	0	0	0	n/a	1	Medium	0
	MelB	MELB	194	199	IVTLRN	714.439	2.085	30	4	3.999	0.023	0.587	0.008	3	Medium	0.003
	MelB	MELB	194	199	IVTLRN	714.439	2.0708	300	4	4	0.049	1.223	0.038	3	Medium	0.015
	MelB	MELB	194	199	IVTLRN	714.439	2.1023	3000	4	4	0.008	0.203	0.044	3	Medium	0.018
	MelB	MELB	194	200	IVTLRNV	813.507	3.9756	0	5	0	0	0	n/a	1	Medium	0
	MelB	MELB	194	200	IVTLRNV	813.507	3.9961	30	5	4.999	0.042	0.848	0.055	3	Medium	0.022
	MelB	MELB	194	200	IVTLRNV	813.507	3.9358	300	5	5	0.126	2.523	0.191	3	Medium	0.077
	MelB	MELB	194	200	IVTLRNV	813.507	3.9325	3000	5	5	0.16	3.194	0.236	3	Medium	0.095
	MelB	MELB	194	201	IVTLRNVH	950.566	2.1962	0	6	0	0	0	n/a	1	Medium	0
	MelB	MELB	194	201	IVTLRNVH	950.566	2.2248	30	6	5.999	0.069	1.152	0.043	3	Medium	0.017
	MelB	MELB	194	201	IVTLRNVH	950.566	2.2068	300	6	6	0.158	2.64	0.027	3	Medium	0.011
	MelB	MELB	194	201	IVTLRNVH	950.566	2.2402	3000	6	6	0.144	2.397	0.152	3	Medium	0.061
	MelB	MELB	194	203	IVTLRNVHEV	1178.68	3.4249	0	8	0	0	0	n/a	1	Medium	0
	MelB	MELB	194	203	IVTLRNVHEV	1178.68	3.4421	30	8	7.921	0.156	1.946	0.018	3	Medium	0.007
	MelB	MELB	194	203	IVTLRNVHEV	1178.68	3.3905	300	8	8	0.279	3.493	0.09	3	Medium	0.036
	MelB	MELB	194	203	IVTLRNVHEV	1178.68	3.4043	3000	8	8	0.26	3.246	0.246	3	Medium	0.099
	MelB	MELB	194	204	IVTLRNVHEVY	1341.74	4.1416	0	9	0	0	0	n/a	1	Medium	0
	MelB	MELB	194	204	IVTLRNVHEVY	1341.74	4.1564	30	9	8.92	0.128	1.422	0.015	3	High	0.006
	MelB	MELB	194	204	IVTLRNVHEVY	1341.74	4.0966	300	9	9	0.31	3.441	0.203	3	High	0.082
	MelB	MELB	194	204	IVTLRNVHEVY	1341.74	4.0914	3000	9	9	0.316	3.515	0.27	3	High	0.109
	MelB	MELB	199	204	NVHEVY	759.355	2.2991	0	4	0	0	0	n/a	1	Medium	0
	MelB	MELB	199	204	NVHEVY	759.355	2.3328	30	4	3.921	0.153	3.83	0.046	3	Medium	0.019
	MelB	MELB	199	204	NVHEVY	759.355	2.2989	300	4	4	0.369	9.236	0.363	3	Medium	0.146
	MelB	MELB	199	204	NVHEVY	759.355	2.3484	3000	4	4	0.311	7.764	0.273	3	Medium	0.11
	MelB	MELB	208	217	NGVTAGRPHL	1020.55	2.1697	0	7	0	0	0	n/a	1	Medium	0
	MelB	MELB	208	217	NGVTAGRPHL	1020.55	2.2107	30	7	6.995	0.233	3.335	0.033	3	Medium	0.013
	MelB	MELB	208	217	NGVTAGRPHL	1020.55	2.1697	300	7	7	0.33	4.713	0.021	3	Medium	0.008
	MelB	MELB	208	217	NGVTAGRPHL	1020.55	2.2686	3000	7	7	0.247	3.533	0.405	3	Medium	0.163
	MelB	MELB	212	225	AGRPHLTLKTIVGL	1474.9	5.7772	0	11	0	0	0	n/a	1	Medium	0
	MelB	MELB	212	225	AGRPHLTLKTIVGL	1474.9	5.791	30	11	10.87	0.641	5.826	0.387	3	Medium	0.156
	MelB	MELB	212	225	AGRPHLTLKTIVGL	1474.9	5.7231	300	11	11	1.194	10.853	0.359	3	Medium	0.144
	MelB	MELB	212	225	AGRPHLTLKTIVGL	1474.9	5.7163	3000	11	11	0.988	8.985	1.006	3	Medium	0.405
	MelB	MELB	218	225	TLKTIVGL	843.543	5.6375	0	6	0	0	0	n/a	1	Medium	0
	MelB	MELB	218	225	TLKTIVGL	843.543	5.568	30	6	5.87	0.364	6.072	0.079	3	Medium	0.032
	MelB	MELB	218	225	TLKTIVGL	843.543	5.5022	300	6	6	0.514	8.564	0.238	3	Medium	0.096
	MelB	MELB	218	225	TLKTIVGL	843.543	5.3285	3000	6	6	0.702	11.694	0.88	3	Medium	0.354
	MelB	MELB	219	225	LKTIVGL	742.495	5.0338	0	5	0	0	0	n/a	1	Medium	0
	MelB	MELB	219	225	LKTIVGL	742.495	5.0382	30	5	4.87	0.271	5.43	0.031	3	Medium	0.013
	MelB	MELB	219	225	LKTIVGL	742.495	5.0211	300	5	5	0.351	7.028	0.159	3	Medium	0.064
	MelB	MELB	219	225	LKTIVGL	742.495	4.9897	3000	5	5	0.596	11.92	0.337	3	Medium	0.136
	MelB	MELB	219	227	LKTIVGLIY	1018.64	7.4528	0	7	0	0	0	n/a	1	High	0
	MelB	MELB	219	227	LKTIVGLIY	1018.64	7.4589	30	7	6.738	0.226	3.226	0.054	3	High	0.022
	MelB	MELB	219	227	LKTIVGLIY	1018.64	7.4053	300	7	7	0.306	4.371	0.169	3	Medium	0.068
	MelB	MELB	219	227	LKTIVGLIY	1018.64	7.391	3000	7	7	0.467	6.676	0.43	3	Medium	0.173
	MelB	MELB	220	225	KTIVGL	629.411	3.8592	0	4	0	0	0	n/a	1	Medium	0
	MelB	MELB	220	225	KTIVGL	629.411	3.8383	30	4	3.87	0.049	1.214	0.007	3	Medium	0.003
	MelB	MELB	220	225	KTIVGL	629.411	3.7974	300	4	4	0.068	1.693	0.072	3	Medium	0.029
	MelB	MELB	220	225	KTIVGL	629.411	3.8145	3000	4	4	0.253	6.33	0.253	3	Medium	0.102
	MelB	MELB	220	227	KTIVGLIY	905.559	6.2119	0	6	0	0	0	n/a	1	Medium	0
	MelB	MELB	220	227	KTIVGLIY	905.559	6.2604	30	6	5.738	0.065	1.091	0.001	3	Medium	0
	MelB	MELB	220	227	KTIVGLIY	905.559	6.2221	300	6	6	0.125	2.09	0.061	3	Medium	0.024
	MelB	MELB	220	227	KTIVGLIY	905.559	6.2263	3000	6	6	0.257	4.291	0.17	3	Medium	0.068
	MelB	MELB	221	225	TIVGL	501.316	5.0915	0	3	0	0	0	n/a	1	High	0
	MelB	MELB	221	225	TIVGL	501.316	5.1254	30	3	2.875	0.046	1.542	0.019	3	High	0.008
	MelB	MELB	221	225	TIVGL	501.316	5.0547	300	3	3	0.065	2.165	0.047	3	High	0.019
	MelB	MELB	221	225	TIVGL	501.316	5.0542	3000	3	3	0.199	6.65	0.138	3	High	0.056
	MelB	MELB	222	227	IVGLIY	676.416	6.9396	0	4	0	0	0	n/a	1	Medium	0
	MelB	MELB	222	227	IVGLIY	676.416	7.0063	30	4	3.867	0.024	0.591	0.017	3	Medium	0.007
	MelB	MELB	222	227	IVGLIY	676.416	6.9225	300	4	4	0.063	1.575	0.045	3	Medium	0.018
	MelB	MELB	222	227	IVGLIY	676.416	6.9247	3000	4	4	0.17	4.259	0.214	3	Medium	0.086
	MelB	MELB	226	232	IYKNDQL	892.465	2.6746	0	5	0	0	0	n/a	1	High	0
	MelB	MELB	226	232	IYKNDQL	892.465	2.691	30	5	4.999	0.156	3.121	0.025	3	High	0.01
	MelB	MELB	226	232	IYKNDQL	892.465	2.6578	300	5	5	0.277	5.549	0.054	3	High	0.022
	MelB	MELB	226	232	IYKNDQL	892.465	2.6839	3000	5	5	0.523	10.465	0.388	3	Medium	0.156
	MelB	MELB	226	235	IYKNDQLSCL	1195.59	5.2967	0	8	0	0	0	n/a	1	High	0
	MelB	MELB	226	235	IYKNDQLSCL	1195.59	5.3088	30	8	7.999	0.043	0.535	0.01	3	High	0.004
	MelB	MELB	226	235	IYKNDQLSCL	1195.59	5.2487	300	8	8	0.154	1.928	0.164	3	Medium	0.066
	MelB	MELB	226	235	IYKNDQLSCL	1195.59	5.2171	3000	8	8	0.357	4.463	0.423	3	Medium	0.17
	MelB	MELB	230	235	DQLSCL	677.305	5.5635	0	4	0	0	0	n/a	1	Medium	0
	MelB	MELB	230	235	DQLSCL	677.305	5.5453	30	4	3.999	0.053	1.32	0.016	3	Medium	0.006
	MelB	MELB	230	235	DQLSCL	677.305	5.4944	300	4	4	0.105	2.617	0.095	3	Medium	0.038
	MelB	MELB	230	235	DQLSCL	677.305	5.4962	3000	4	4	0.112	2.791	0.224	3	Medium	0.09
	MelB	MELB	231	235	QLSCL	562.279	5.0602	0	3	0	0	0	n/a	1	Medium	0
	MelB	MELB	231	235	QLSCL	562.279	5.057	30	3	3	-0.015	-0.503	0.042	3	Medium	0.017
	MelB	MELB	231	235	QLSCL	562.279	5.0057	300	3	3	0.01	0.32	0.072	3	Medium	0.029
	MelB	MELB	231	235	QLSCL	562.279	5.0048	3000	3	3	0.084	2.793	0.068	3	Medium	0.028
	MelB	MELB	236	239	LGMA	390.194	2.643	0	2	0	0	0	n/a	1	Medium	0
	MelB	MELB	236	239	LGMA	390.194	2.6187	30	2	2	0.056	2.792	0.028	3	Medium	0.011
	MelB	MELB	236	239	LGMA	390.194	2.6157	300	2	2	0.016	0.808	0.023	3	Medium	0.009
	MelB	MELB	236	239	LGMA	390.194	2.6132	3000	2	2	0.076	3.798	0.02	3	Medium	0.008
	MelB	MELB	240	250	LAYNIASNIIN	1204.65	6.3187	0	9	0	0	0	n/a	1	Medium	0
	MelB	MELB	240	250	LAYNIASNIIN	1204.65	6.3186	30	9	8.857	0.048	0.528	0.048	3	Medium	0.019
	MelB	MELB	240	250	LAYNIASNIIN	1204.65	6.2993	300	9	9	0.12	1.338	0.094	3	Medium	0.038
	MelB	MELB	240	250	LAYNIASNIIN	1204.65	6.2898	3000	9	9	0.141	1.562	0.112	3	Medium	0.045
	MelB	MELB	240	251	LAYNIASNIING	1261.67	6.8147	0	10	0	0	0	n/a	1	Medium	0
	MelB	MELB	240	251	LAYNIASNIING	1261.67	6.8058	30	10	9.857	-0.052	-0.52	0.076	3	Medium	0.031
	MelB	MELB	240	251	LAYNIASNIING	1261.67	6.7882	300	10	10	0.08	0.8	0.165	3	Medium	0.066
	MelB	MELB	240	251	LAYNIASNIING	1261.67	6.7904	3000	10	10	-0.002	-0.023	0.098	3	Medium	0.039
	MelB	MELB	242	255	YNIASNIINGFAIY	1571.8	10.0304	0	12	0	0	0	n/a	1	High	0
	MelB	MELB	242	255	YNIASNIINGFAIY	1571.8	10.0547	30	12	11.818	0.058	0.486	0.009	3	High	0.004
	MelB	MELB	242	255	YNIASNIINGFAIY	1571.8	10.0155	300	12	12	0.218	1.82	0.181	3	Medium	0.073
	MelB	MELB	242	255	YNIASNIINGFAIY	1571.8	10.0038	3000	12	12	0.296	2.466	0.133	3	Medium	0.054
	MelB	MELB	244	253	IASNIINGFA	1018.54	6.5208	0	8	0	0	0	n/a	1	High	0
	MelB	MELB	244	253	IASNIINGFA	1018.54	6.5359	30	8	7.858	-0.074	-0.919	0.195	3	High	0.078
	MelB	MELB	244	253	IASNIINGFA	1018.54	6.4614	300	8	8	0.016	0.195	0.077	3	Medium	0.031
	MelB	MELB	244	253	IASNIINGFA	1018.54	6.5101	3000	8	8	0.055	0.689	0.238	3	Medium	0.096
	MelB	MELB	244	255	IASNIINGFAIY	1294.69	8.4658	0	10	0	0	0	n/a	1	High	0
	MelB	MELB	244	255	IASNIINGFAIY	1294.69	8.4672	30	10	9.819	0.032	0.324	0.019	3	High	0.008
	MelB	MELB	244	255	IASNIINGFAIY	1294.69	8.4444	300	10	10	0.145	1.451	0.111	3	High	0.045
	MelB	MELB	244	255	IASNIINGFAIY	1294.69	8.4432	3000	10	10	0.176	1.759	0.091	3	High	0.036
	MelB	MELB	246	255	SNIINGFAIY	1110.57	8.0633	0	8	0	0	0	n/a	1	High	0
	MelB	MELB	246	255	SNIINGFAIY	1110.57	8.1434	30	8	7.819	0.019	0.243	0.011	3	Medium	0.004
	MelB	MELB	246	255	SNIINGFAIY	1110.57	8.1133	300	8	8	0.102	1.272	0.077	3	Medium	0.031
	MelB	MELB	246	255	SNIINGFAIY	1110.57	8.0867	3000	8	8	0.139	1.743	0.048	3	Medium	0.019
	MelB	MELB	252	255	FAIY	512.264	6.0176	0	2	0	0	0	n/a	1	High	0
	MelB	MELB	252	255	FAIY	512.264	6.0587	30	2	1.961	0.011	0.571	0.013	3	High	0.005
	MelB	MELB	252	255	FAIY	512.264	6.0201	300	2	2	0.036	1.819	0.025	3	High	0.01
	MelB	MELB	252	255	FAIY	512.264	5.998	3000	2	2	0.039	1.947	0.077	3	High	0.031
	MelB	MELB	254	257	IYYF	604.29	7.604	0	2	0	0	0	n/a	1	Medium	0
	MelB	MELB	254	257	IYYF	604.29	7.6213	30	2	2	0	-0.003	0.028	3	Medium	0.011
	MelB	MELB	254	257	IYYF	604.29	7.5821	300	2	2	0.004	0.222	0.009	3	Medium	0.003
	MelB	MELB	254	257	IYYF	604.29	7.575	3000	2	2	0.015	0.752	0.018	3	Medium	0.007
	MelB	MELB	256	259	YFTY	592.253	5.5469	0	2	0	0	0	n/a	1	High	0
	MelB	MELB	256	259	YFTY	592.253	5.5374	30	2	2	0.008	0.401	0.005	3	High	0.002
	MelB	MELB	256	259	YFTY	592.253	5.5487	300	2	2	0.039	1.943	0.029	3	High	0.012
	MelB	MELB	256	259	YFTY	592.253	5.5257	3000	2	2	0.053	2.653	0.03	3	High	0.012
	MelB	MELB	258	262	TYVIG	551.295	3.706	0	3	0	0	0	n/a	1	Medium	0
	MelB	MELB	258	262	TYVIG	551.295	3.7022	30	3	2.891	0.081	2.691	0.065	3	Medium	0.026
	MelB	MELB	258	262	TYVIG	551.295	3.681	300	3	3	0.199	6.632	0.172	3	Medium	0.069
	MelB	MELB	258	262	TYVIG	551.295	3.6791	3000	3	3	0.272	9.07	0.202	3	Medium	0.081
	MelB	MELB	263	267	DADLF	579.254	6.2177	0	3	0	0	0	n/a	1	Medium	0
	MelB	MELB	263	267	DADLF	579.254	6.2681	30	3	2.956	0.078	2.611	0.019	3	Medium	0.008
	MelB	MELB	263	267	DADLF	579.254	6.1652	300	3	3	0.177	5.889	0.176	3	Medium	0.071
	MelB	MELB	263	267	DADLF	579.254	6.196	3000	3	3	0.24	8.002	0.098	3	Medium	0.039
	MelB	MELB	263	270	DADLFPYY	1002.43	8.4277	0	5	0	0	0	n/a	1	High	0
	MelB	MELB	263	270	DADLFPYY	1002.43	8.4722	30	5	4.952	0.092	1.844	0.031	3	High	0.013
	MelB	MELB	263	270	DADLFPYY	1002.43	8.4283	300	5	5	0.229	4.586	0.236	3	High	0.095
	MelB	MELB	263	270	DADLFPYY	1002.43	8.4178	3000	5	5	0.313	6.266	0.174	3	High	0.07
	MelB	MELB	265	270	DLFPYY	816.369	8.6549	0	3	0	0	0	n/a	1	Medium	0
	MelB	MELB	265	270	DLFPYY	816.369	8.6143	30	3	2.994	-0.061	-2.036	0.035	3	Medium	0.014
	MelB	MELB	265	270	DLFPYY	816.369	8.5454	300	3	3	0.054	1.789	0.215	3	Medium	0.087
	MelB	MELB	265	270	DLFPYY	816.369	8.5499	3000	3	3	0.185	6.171	0.13	3	Medium	0.053
	MelB	MELB	266	270	LFPYY	701.342	7.2937	0	2	0	0	0	n/a	1	High	0
	MelB	MELB	266	270	LFPYY	701.342	7.29	30	2	1.996	0.021	1.042	0.042	3	High	0.017
	MelB	MELB	266	270	LFPYY	701.342	7.2486	300	2	2	0.08	3.994	0.098	3	High	0.039
	MelB	MELB	266	270	LFPYY	701.342	7.2345	3000	2	2	0.09	4.522	0.102	3	Medium	0.041
	MelB	MELB	273	282	YAGAANLLTL	1005.55	7.8533	0	8	0	0	0	n/a	1	High	0
	MelB	MELB	273	282	YAGAANLLTL	1005.55	7.8889	30	8	7.946	0.16	2.003	0.056	3	High	0.022
	MelB	MELB	273	282	YAGAANLLTL	1005.55	7.829	300	8	8	0.294	3.672	0.159	3	High	0.064
	MelB	MELB	273	282	YAGAANLLTL	1005.55	7.8046	3000	8	8	0.487	6.083	0.364	3	Medium	0.147
	MelB	MELB	274	282	AGAANLLTL	842.486	7.2455	0	7	0	0	0	n/a	1	High	0
	MelB	MELB	274	282	AGAANLLTL	842.486	7.2289	30	7	6.946	0.05	0.721	0.02	3	High	0.008
	MelB	MELB	274	282	AGAANLLTL	842.486	7.2165	300	7	7	0.105	1.504	0.155	3	High	0.063
	MelB	MELB	274	282	AGAANLLTL	842.486	7.2145	3000	7	7	0.218	3.116	0.215	3	High	0.087
	MelB	MELB	281	288	TLIVFPRL	957.601	8.0949	0	5	0	0	0	n/a	1	High	0
	MelB	MELB	281	288	TLIVFPRL	957.601	8.1115	30	5	4.747	0.154	3.087	0.033	3	High	0.013
	MelB	MELB	281	288	TLIVFPRL	957.601	8.0385	300	5	5	0.242	4.843	0.129	3	High	0.052
	MelB	MELB	281	288	TLIVFPRL	957.601	8.0325	3000	5	5	0.453	9.063	0.252	3	High	0.101
	MelB	MELB	283	288	IVFPRL	743.469	6.8928	0	3	0	0	0	n/a	1	High	0
	MelB	MELB	283	288	IVFPRL	743.469	6.8788	30	3	2.999	0.148	4.922	0.044	3	High	0.018
	MelB	MELB	283	288	IVFPRL	743.469	6.8445	300	3	3	0.215	7.171	0.116	3	High	0.047
	MelB	MELB	283	288	IVFPRL	743.469	6.8501	3000	3	3	0.414	13.79	0.224	3	Medium	0.09
	MelB	MELB	283	290	IVFPRLVK	970.633	4.3044	0	5	0	0	0	n/a	1	Medium	0
	MelB	MELB	283	290	IVFPRLVK	970.633	4.2707	30	5	4.887	0.292	5.835	0.172	3	Medium	0.069
	MelB	MELB	283	290	IVFPRLVK	970.633	4.2822	300	5	5	0.303	6.07	0.262	3	Medium	0.106
	MelB	MELB	283	290	IVFPRLVK	970.633	4.2832	3000	5	5	0.618	12.367	0.273	3	Medium	0.11
	MelB	MELB	289	292	VKML	489.298	3.0198	0	2	0	0	0	n/a	1	Medium	0
	MelB	MELB	289	292	VKML	489.298	2.9931	30	2	1.998	0.059	2.942	0.011	3	Medium	0.004
	MelB	MELB	289	292	VKML	489.298	2.9506	300	2	2	0.182	9.08	0.122	3	Medium	0.049
	MelB	MELB	289	292	VKML	489.298	2.9736	3000	2	2	0.398	19.878	0.295	3	Medium	0.119
	MelB	MELB	291	297	MLSRRIL	887.538	3.1844	0	5	0	0	0	n/a	1	Medium	0
	MelB	MELB	291	297	MLSRRIL	887.538	3.2106	30	5	4.935	0.556	11.123	0.099	3	Medium	0.04
	MelB	MELB	291	297	MLSRRIL	887.538	3.1201	300	5	5	0.792	15.846	0.269	3	Medium	0.108
	MelB	MELB	291	297	MLSRRIL	887.538	3.1588	3000	5	5	0.974	19.485	3.204	2	Medium	0.357
	MelB	MELB	292	297	LSRRIL	756.497	2.4047	0	4	0	0	0	n/a	1	High	0
	MelB	MELB	292	297	LSRRIL	756.497	2.4211	30	4	3.935	0.485	12.116	0.062	3	Medium	0.025
	MelB	MELB	292	297	LSRRIL	756.497	2.3644	300	4	4	0.665	16.613	0.198	3	Medium	0.08
	MelB	MELB	292	297	LSRRIL	756.497	2.4552	3000	4	4	0.765	19.137	0.373	3	Medium	0.15
	MelB	MELB	295	301	RILWAGA	785.455	5.4832	0	5	0	0	0	n/a	1	Medium	0
	MelB	MELB	295	301	RILWAGA	785.455	5.5215	30	5	4.925	0.133	2.663	0.125	3	Medium	0.05
	MelB	MELB	295	301	RILWAGA	785.455	5.4634	300	5	5	0.146	2.911	0.086	3	Medium	0.035
	MelB	MELB	295	301	RILWAGA	785.455	5.4558	3000	5	5	0.184	3.68	0.103	3	Medium	0.041
	MelB	MELB	308	312	SCAGL	449.194	3.0092	0	3	0	0	0	n/a	1	High	0
	MelB	MELB	308	312	SCAGL	449.194	3.0249	30	3	2.999	0.015	0.504	0.007	3	High	0.003
	MelB	MELB	308	312	SCAGL	449.194	2.977	300	3	3	0.045	1.503	0.042	3	High	0.017
	MelB	MELB	308	312	SCAGL	449.194	2.9806	3000	3	3	0.083	2.761	0.077	3	High	0.031
	MelB	MELB	308	313	SCAGLF	596.263	6.6209	0	4	0	0	0	n/a	1	High	0
	MelB	MELB	308	313	SCAGLF	596.263	6.6132	30	4	3.997	0.024	0.602	0.089	3	High	0.036
	MelB	MELB	308	313	SCAGLF	596.263	6.5741	300	4	4	0.034	0.852	0.121	3	High	0.049
	MelB	MELB	308	313	SCAGLF	596.263	6.5646	3000	4	4	0.082	2.049	0.015	3	High	0.006
	MelB	MELB	316	325	ALADIHNAAL	1007.54	4.2496	0	8	0	0	0	n/a	1	Medium	0
	MelB	MELB	316	325	ALADIHNAAL	1007.54	4.2672	30	8	7.883	0.258	3.227	0.033	3	Medium	0.013
	MelB	MELB	316	325	ALADIHNAAL	1007.54	4.2142	300	8	8	0.547	6.839	0.36	3	Medium	0.145
	MelB	MELB	316	325	ALADIHNAAL	1007.54	4.2132	3000	8	8	0.633	7.915	0.519	3	Medium	0.209
	MelB	MELB	317	323	LADIHNA	752.382	1.9659	0	5	0	0	0	n/a	1	High	0
	MelB	MELB	317	323	LADIHNA	752.382	1.9929	30	5	4.892	0.236	4.723	0.065	3	Medium	0.026
	MelB	MELB	317	323	LADIHNA	752.382	1.9914	300	5	5	0.389	7.781	0.17	3	Medium	0.068
	MelB	MELB	317	323	LADIHNA	752.382	2.012	3000	5	5	0.406	8.118	0.327	3	Medium	0.132
	MelB	MELB	317	325	LADIHNAAL	936.503	3.6802	0	7	0	0	0	n/a	1	High	0
	MelB	MELB	317	325	LADIHNAAL	936.503	3.6794	30	7	6.883	0.268	3.822	0.036	3	High	0.014
	MelB	MELB	317	325	LADIHNAAL	936.503	3.6441	300	7	7	0.507	7.238	0.249	3	High	0.1
	MelB	MELB	317	325	LADIHNAAL	936.503	3.6401	3000	7	7	0.603	8.614	0.418	3	Medium	0.168
	MelB	MELB	348	358	VADTVDYGEFK	1242.58	4.3751	0	9	0	0	0	n/a	1	High	0
	MelB	MELB	348	358	VADTVDYGEFK	1242.58	4.3654	30	9	8.994	0.126	1.397	0.013	3	High	0.005
	MelB	MELB	348	358	VADTVDYGEFK	1242.58	4.3069	300	9	9	0.264	2.933	0.217	3	High	0.088
	MelB	MELB	348	358	VADTVDYGEFK	1242.58	4.3151	3000	9	9	0.302	3.356	0.346	3	High	0.139
	MelB	MELB	348	359	VADTVDYGEFKL	1355.66	6.9814	0	10	0	0	0	n/a	1	Medium	0
	MelB	MELB	348	359	VADTVDYGEFKL	1355.66	7.0116	30	10	9.992	0.083	0.827	0.056	3	Medium	0.023
	MelB	MELB	348	359	VADTVDYGEFKL	1355.66	6.9761	300	10	10	0.262	2.623	0.288	3	Medium	0.116
	MelB	MELB	348	359	VADTVDYGEFKL	1355.66	6.928	3000	10	10	0.237	2.37	0.345	3	Medium	0.139
	MelB	MELB	350	358	DTVDYGEFK	1072.47	4.1127	0	7	0	0	0	n/a	1	High	0
	MelB	MELB	350	358	DTVDYGEFK	1072.47	4.1124	30	7	6.994	0.09	1.28	0.001	3	High	0.001
	MelB	MELB	350	358	DTVDYGEFK	1072.47	4.0969	300	7	7	0.184	2.624	0.144	3	Medium	0.058
	MelB	MELB	350	358	DTVDYGEFK	1072.47	4.0897	3000	7	7	0.196	2.804	0.221	3	High	0.089
	MelB	MELB	354	358	YGEFK	642.301	2.5265	0	3	0	0	0	n/a	1	Medium	0
	MelB	MELB	354	358	YGEFK	642.301	2.5391	30	3	2.999	0.071	2.372	0.035	3	Medium	0.014
	MelB	MELB	354	358	YGEFK	642.301	2.5273	300	3	3	0.105	3.501	0.043	3	Medium	0.017
	MelB	MELB	354	358	YGEFK	642.301	2.5493	3000	3	3	0.11	3.665	0.131	3	Medium	0.053
	MelB	MELB	354	359	YGEFKL	755.385	6.0174	0	4	0	0	0	n/a	1	Medium	0
	MelB	MELB	354	359	YGEFKL	755.385	6.0098	30	4	3.997	0.047	1.172	0.036	3	Medium	0.015
	MelB	MELB	354	359	YGEFKL	755.385	5.9517	300	4	4	0.11	2.745	0.177	3	Medium	0.071
	MelB	MELB	354	359	YGEFKL	755.385	5.8817	3000	4	4	0.247	6.185	0.942	2	Medium	0.105
	MelB	MELB	363	367	CESIA	521.216	2.1353	0	3	0	0	0	n/a	1	High	0
	MelB	MELB	363	367	CESIA	521.216	2.1541	30	3	2.999	0.336	11.19	0.04	3	Medium	0.016
	MelB	MELB	363	367	CESIA	521.216	2.122	300	3	3	0.562	18.729	0.267	3	Medium	0.107
	MelB	MELB	363	367	CESIA	521.216	2.157	3000	3	3	0.897	29.885	0.374	3	Medium	0.15
	MelB	MELB	368	373	YSVQTM	727.321	3.6693	0	4	0	0	0	n/a	1	High	0
	MelB	MELB	368	373	YSVQTM	727.321	3.6983	30	4	3.999	0.1	2.499	0.046	3	High	0.019
	MelB	MELB	368	373	YSVQTM	727.321	3.6385	300	4	4	0.162	4.052	0.116	3	High	0.047
	MelB	MELB	368	373	YSVQTM	727.321	3.6613	3000	4	4	0.513	12.828	0.276	3	Medium	0.111
	MelB	MELB	372	383	TMVVKGGSAFAA	1137.59	3.6218	0	10	0	0	0	n/a	1	Medium	0
	MelB	MELB	372	383	TMVVKGGSAFAA	1137.59	3.6424	30	10	9.913	0.04	0.404	0.02	3	Medium	0.008
	MelB	MELB	372	383	TMVVKGGSAFAA	1137.59	3.5754	300	10	10	0.112	1.116	0.078	3	Medium	0.031
	MelB	MELB	372	383	TMVVKGGSAFAA	1137.59	3.5853	3000	10	10	0.11	1.103	0.139	3	Medium	0.056
	MelB	MELB	374	381	VVKGGSAF	763.423	2.5264	0	6	0	0	0	n/a	1	Medium	0
	MelB	MELB	374	381	VVKGGSAF	763.423	2.4511	30	6	6	3.227	53.79	0.024	3	Medium	0.01
	MelB	MELB	374	381	VVKGGSAF	763.423	2.5273	300	6	6	3.232	53.868	0.086	3	Medium	0.035
	MelB	MELB	374	381	VVKGGSAF	763.423	2.5297	3000	6	6	3.216	53.594	0.033	3	Medium	0.013
	MelB	MELB	374	383	VVKGGSAFAA	905.497	2.5213	0	8	0	0	0	n/a	1	High	0
	MelB	MELB	374	383	VVKGGSAFAA	905.497	2.5377	30	8	8	0.053	0.663	0.004	3	High	0.002
	MelB	MELB	374	383	VVKGGSAFAA	905.497	2.5042	300	8	8	0.103	1.293	0.064	3	Medium	0.026
	MelB	MELB	374	383	VVKGGSAFAA	905.497	2.5404	3000	8	8	0.111	1.384	0.123	3	High	0.05
	MelB	MELB	377	383	GGSAFAA	579.265	2.956	0	5	0	0	0	n/a	1	Medium	0
	MelB	MELB	377	383	GGSAFAA	579.265	2.9665	30	5	5	0.042	0.846	0.066	3	Medium	0.026
	MelB	MELB	377	383	GGSAFAA	579.265	2.9241	300	5	5	0.04	0.807	0.027	3	Medium	0.011
	MelB	MELB	377	383	GGSAFAA	579.265	2.9468	3000	5	5	0.033	0.666	0.019	3	Medium	0.008
	MelB	MELB	381	385	FAAFF	601.29	8.9284	0	3	0	0	0	n/a	1	Medium	0
	MelB	MELB	381	385	FAAFF	601.29	8.8786	30	3	3	0.038	1.282	0.072	3	Medium	0.029
	MelB	MELB	381	385	FAAFF	601.29	8.8688	300	3	3	0.06	1.992	0.016	3	Medium	0.007
	MelB	MELB	381	385	FAAFF	601.29	8.8466	3000	3	3	0.069	2.294	0.052	3	Medium	0.021
	MelB	MELB	393	404	IGYTPNVAQSAQ	1247.61	3.1155	0	9	0	0	0	n/a	1	High	0
	MelB	MELB	393	404	IGYTPNVAQSAQ	1247.61	3.1381	30	9	8.999	0.238	2.643	0.046	3	High	0.018
	MelB	MELB	393	404	IGYTPNVAQSAQ	1247.61	3.1025	300	9	9	0.332	3.684	0.235	3	High	0.095
	MelB	MELB	393	404	IGYTPNVAQSAQ	1247.61	3.1126	3000	9	9	0.285	3.164	0.245	3	High	0.099
	MelB	MELB	393	405	IGYTPNVAQSAQT	1348.66	3.1951	0	10	0	0	0	n/a	1	High	0
	MelB	MELB	393	405	IGYTPNVAQSAQT	1348.66	3.1983	30	10	9.999	0.267	2.674	0.041	3	High	0.017
	MelB	MELB	393	405	IGYTPNVAQSAQT	1348.66	3.1732	300	10	10	0.369	3.694	0.3	3	High	0.121
	MelB	MELB	393	405	IGYTPNVAQSAQT	1348.66	3.1875	3000	10	10	0.319	3.186	0.34	3	High	0.137
	MelB	MELB	395	406	YTPNVAQSAQTL	1291.64	4.3021	0	9	0	0	0	n/a	1	Medium	0
	MelB	MELB	395	406	YTPNVAQSAQTL	1291.64	4.2987	30	9	8.999	-0.023	-0.26	0.092	3	Medium	0.037
	MelB	MELB	395	406	YTPNVAQSAQTL	1291.64	4.2789	300	9	9	0.068	0.754	0.987	2	Medium	0.11
	MelB	MELB	395	406	YTPNVAQSAQTL	1291.64	4.25	3000	9	9	-0.032	-0.356	0.129	3	Medium	0.052
	MelB	MELB	405	413	TLQGMQFIM	1067.51	8.5247	0	7	0	0	0	n/a	1	Medium	0
	MelB	MELB	405	413	TLQGMQFIM	1067.51	8.4916	30	7	6.979	0.018	0.257	0.061	3	Medium	0.025
	MelB	MELB	405	413	TLQGMQFIM	1067.51	8.4158	300	7	7	0.057	0.814	0.138	3	Medium	0.055
	MelB	MELB	405	413	TLQGMQFIM	1067.51	8.432	3000	7	7	0.046	0.662	0.133	3	Medium	0.054
	MelB	MELB	407	411	QGMQF	609.258	5.2545	0	3	0	0	0	n/a	1	Medium	0
	MelB	MELB	407	411	QGMQF	609.258	5.2574	30	3	3	0.07	2.334	0.007	3	Medium	0.003
	MelB	MELB	407	411	QGMQF	609.258	5.2345	300	3	3	0.122	4.081	0.08	3	Medium	0.032
	MelB	MELB	407	411	QGMQF	609.258	5.2237	3000	3	3	0.113	3.775	0.099	3	Medium	0.04
	MelB	MELB	414	419	IVLPVL	652.452	7.8567	0	3	0	0	0	n/a	1	Medium	0
	MelB	MELB	414	419	IVLPVL	652.452	7.8622	30	3	2.806	0.012	0.398	0.016	3	High	0.006
	MelB	MELB	414	419	IVLPVL	652.452	7.8158	300	3	3	0.01	0.326	0.002	3	Medium	0.001
	MelB	MELB	414	419	IVLPVL	652.452	7.8308	3000	3	3	0.012	0.4	0.007	3	Medium	0.003
	MelB	MELB	420	422	FFM	443.188	7.0389	0	1	0	0	0	n/a	1	Medium	0
	MelB	MELB	420	422	FFM	443.188	7.0346	30	1	1	0.03	3.022	0.073	3	Medium	0.029
	MelB	MELB	420	422	FFM	443.188	6.9743	300	1	1	0.022	2.153	0.073	3	Medium	0.029
	MelB	MELB	420	422	FFM	443.188	6.9996	3000	1	1	0.037	3.746	0.005	3	Medium	0.002
	MelB	MELB	421	424	FMMT	528.208	4.4377	0	2	0	0	0	n/a	1	High	0
	MelB	MELB	421	424	FMMT	528.208	4.4462	30	2	2	0.069	3.451	0.018	3	High	0.007
	MelB	MELB	421	424	FMMT	528.208	4.3892	300	2	2	0.047	2.339	0.066	3	High	0.027
	MelB	MELB	421	424	FMMT	528.208	4.3871	3000	2	2	0.059	2.937	0.02	3	Medium	0.008
	MelB	MELB	422	425	MMTL	494.223	5.6855	0	2	0	0	0	n/a	1	Medium	0
	MelB	MELB	422	425	MMTL	494.223	5.6357	30	2	1.999	0.05	2.484	0.018	3	Medium	0.007
	MelB	MELB	422	425	MMTL	494.223	5.6093	300	2	2	0.041	2.045	0.154	3	Medium	0.062
	MelB	MELB	422	425	MMTL	494.223	5.632	3000	2	2	0.104	5.185	0.225	3	Medium	0.09
	MelB	MELB	426	430	VLYFR	696.396	4.7138	0	3	0	0	0	n/a	1	Medium	0
	MelB	MELB	426	430	VLYFR	696.396	4.7348	30	3	2.997	-0.008	-0.266	0.004	3	High	0.001
	MelB	MELB	426	430	VLYFR	696.396	4.6718	300	3	3	0.006	0.213	0.045	3	High	0.018
	MelB	MELB	426	430	VLYFR	696.396	4.6862	3000	3	3	-0.002	-0.077	0.003	3	High	0.001
	MelB	MELB	426	431	VLYFRY	859.459	6.3557	0	4	0	0	0	n/a	1	Medium	0
	MelB	MELB	426	431	VLYFRY	859.459	6.3763	30	4	3.997	0.034	0.842	0.016	3	Medium	0.006
	MelB	MELB	426	431	VLYFRY	859.459	6.3441	300	4	4	0.076	1.895	0.035	3	Medium	0.014
	MelB	MELB	426	431	VLYFRY	859.459	6.326	3000	4	4	0.048	1.196	0.023	3	Medium	0.009
	MelB	MELB	428	431	YFRY	647.307	4.1338	0	2	0	0	0	n/a	1	Medium	0
	MelB	MELB	428	431	YFRY	647.307	4.1424	30	2	2	0.017	0.873	0.021	3	Medium	0.009
	MelB	MELB	428	431	YFRY	647.307	4.0597	300	2	2	0.033	1.63	0.025	3	Medium	0.01
	MelB	MELB	428	431	YFRY	647.307	4.0592	3000	2	2	0.013	0.626	0.018	3	Medium	0.007
	MelB	MELB	429	434	FRYYRL	916.492	4.775	0	4	0	0	0	n/a	1	Medium	0
	MelB	MELB	429	434	FRYYRL	916.492	4.7862	30	4	4	-0.123	-3.075	0.149	3	Medium	0.06
	MelB	MELB	429	434	FRYYRL	916.492	4.7162	300	4	4	-0.093	-2.319	0.087	3	Medium	0.035
	MelB	MELB	429	434	FRYYRL	916.492	4.7132	3000	4	4	-0.094	-2.341	0.112	3	Medium	0.045
	MelB	MELB	431	434	YYRL	613.322	4.1021	0	2	0	0	0	n/a	1	High	0
	MelB	MELB	431	434	YYRL	613.322	4.137	30	2	2	0.053	2.659	0.003	3	High	0.001
	MelB	MELB	431	434	YYRL	613.322	4.0754	300	2	2	0.097	4.834	0.061	3	High	0.025
	MelB	MELB	431	434	YYRL	613.322	4.0789	3000	2	2	0.065	3.236	0.066	3	High	0.027
	MelB	MELB	440	447	RKIQIHLL	1019.66	4.2179	0	6	0	0	0	n/a	1	High	0
	MelB	MELB	440	447	RKIQIHLL	1019.66	4.1951	30	6	5.929	0.34	5.659	0.178	3	Medium	0.072
	MelB	MELB	440	447	RKIQIHLL	1019.66	4.1864	300	6	6	0.824	13.737	0.293	3	Medium	0.118
	MelB	MELB	440	447	RKIQIHLL	1019.66	4.194	3000	6	6	2.208	36.794	0.491	3	Medium	0.197
	MelB	MELB	442	447	IQIHLL	735.464	6.4598	0	4	0	0	0	n/a	1	Medium	0
	MelB	MELB	442	447	IQIHLL	735.464	6.4445	30	4	3.941	0.162	4.062	0.036	3	Medium	0.014
	MelB	MELB	442	447	IQIHLL	735.464	6.4011	300	4	4	0.46	11.494	0.358	3	Medium	0.144
	MelB	MELB	442	447	IQIHLL	735.464	6.4049	3000	4	4	1.476	36.912	1.785	2	Medium	0.199
	MelB	MELB	444	447	IHLL	494.322	4.8908	0	2	0	0	0	n/a	1	Medium	0
	MelB	MELB	444	447	IHLL	494.322	4.9088	30	2	1.946	0.096	4.777	0.018	3	Medium	0.007
	MelB	MELB	444	447	IHLL	494.322	4.8617	300	2	2	0.315	15.728	0.174	3	Medium	0.07
	MelB	MELB	444	447	IHLL	494.322	4.8684	3000	2	2	0.693	34.671	0.216	3	Medium	0.087
	MelB	MELB	448	467	DKYRKTPPFVEQPDSPAISV	2273.17	4.536	0	14	0	0	0	n/a	1	High	0
	MelB	MELB	448	467	DKYRKTPPFVEQPDSPAISV	2273.17	4.517	30	14	13.944	8.025	57.321	0.79	3	Medium	0.318
	MelB	MELB	448	467	DKYRKTPPFVEQPDSPAISV	2273.17	4.4952	300	14	14	8.091	57.791	1.02	3	Medium	0.411
	MelB	MELB	448	467	DKYRKTPPFVEQPDSPAISV	2273.17	4.471	3000	14	14	8.584	61.313	0.28	3	Medium	0.113
	MelB	MELB	450	468	YRKTPPFVEQPDSPAISVV	2129.12	5.1263	0	13	0	0	0	n/a	1	High	0
	MelB	MELB	450	468	YRKTPPFVEQPDSPAISVV	2129.12	5.0656	30	13	12.868	7.435	57.192	1.726	3	Medium	0.695
	MelB	MELB	450	468	YRKTPPFVEQPDSPAISVV	2129.12	5.0246	300	13	13	6.967	53.589	1.368	3	Medium	0.551
	MelB	MELB	450	468	YRKTPPFVEQPDSPAISVV	2129.12	5.0457	3000	13	13	7.263	55.867	0.466	3	Medium	0.187
	MelB	MELB	450	469	YRKTPPFVEQPDSPAISVVA	2200.15	4.8567	0	14	0	0	0	n/a	1	High	0
	MelB	MELB	450	469	YRKTPPFVEQPDSPAISVVA	2200.15	4.8378	30	14	13.868	8.595	61.396	0.47	3	High	0.189
	MelB	MELB	450	469	YRKTPPFVEQPDSPAISVVA	2200.15	4.8119	300	14	14	8.581	61.295	0.973	3	Medium	0.392
	MelB	MELB	450	469	YRKTPPFVEQPDSPAISVVA	2200.15	4.8361	3000	14	14	8.657	61.834	0.226	3	Medium	0.091
Na	MelB_Na	MELB	1	9	SISMTTKLS	966.506	3.3167	0	7	0	0	0	n/a	1	High	0
	MelB_Na	MELB	1	9	SISMTTKLS	966.506	3.3316	30	7	6.998	2.358	33.683	0.093	3	Medium	0.038	0.21877
	MelB_Na	MELB	1	9	SISMTTKLS	966.506	3.3194	300	7	7	2.506	35.807	0.461	3	Medium	0.186	0.173973
	MelB_Na	MELB	1	9	SISMTTKLS	966.506	3.3308	3000	7	7	2.584	36.912	0.033	3	Medium	0.013	0.012965
	MelB_Na	MELB	4	9	MTTKLS	679.357	1.8399	0	4	0	0	0	n/a	1	Medium	0
	MelB_Na	MELB	4	9	MTTKLS	679.357	1.8662	30	4	3.998	0.115	2.864	0.836	2	Medium	0.093	0.625853
	MelB_Na	MELB	4	9	MTTKLS	679.357	1.8222	300	4	4	0.115	2.87	2.066	2	Medium	0.23	0.198713
	MelB_Na	MELB	4	9	MTTKLS	679.357	1.8205	3000	4	4	0.81	20.257	0.687	3	Medium	0.276	0.155114
	MelB_Na	MELB	4	10	MTTKLSY	842.421	3.2743	0	5	0	0	0	n/a	1	Medium	0
	MelB_Na	MELB	4	10	MTTKLSY	842.421	3.3408	30	5	4.998	0.436	8.718	0.148	3	Medium	0.059	0.142012
	MelB_Na	MELB	4	10	MTTKLSY	842.421	3.3118	300	5	5	0.733	14.654	0.593	3	Medium	0.239	0.887279
	MelB_Na	MELB	4	10	MTTKLSY	842.421	3.3789	3000	5	5	0.784	15.676	0.229	3	Medium	0.092	0.785085
	MelB_Na	MELB	6	14	TKLSYGFGA	942.481	4.7218	0	7	0	0	0	n/a	1	High	0
	MelB_Na	MELB	6	14	TKLSYGFGA	942.481	4.7539	30	7	6.998	0.019	0.266	0.08	3	High	0.032	0.010009
	MelB_Na	MELB	6	14	TKLSYGFGA	942.481	4.7376	300	7	7	0.052	0.748	0.218	3	High	0.088	0.0295304
	MelB_Na	MELB	6	14	TKLSYGFGA	942.481	4.6938	3000	7	7	0.112	1.599	0.153	3	Medium	0.062	0.0241409
	MelB_Na	MELB	11	18	GFGAFGKD	797.371	4.3908	0	6	0	0	0	n/a	1	Medium	0
	MelB_Na	MELB	11	18	GFGAFGKD	797.371	4.4706	30	6	6	0.048	0.792	0.062	3	Medium	0.025	0.272521
	MelB_Na	MELB	11	18	GFGAFGKD	797.371	4.4568	300	6	6	0.056	0.93	0.014	3	Medium	0.005	0.150968
	MelB_Na	MELB	11	18	GFGAFGKD	797.371	4.4503	3000	6	6	0.074	1.225	0.094	3	Medium	0.038	0.0622498
	MelB_Na	MELB	12	18	FGAFGKD	740.349	3.8434	0	5	0	0	0	n/a	1	Medium	0
	MelB_Na	MELB	12	18	FGAFGKD	740.349	3.8053	30	5	5	0.102	2.039	0.218	3	Medium	0.088	0.899409
	MelB_Na	MELB	12	18	FGAFGKD	740.349	3.7941	300	5	5	0.123	2.463	0.106	3	Medium	0.043	0.142881
	MelB_Na	MELB	12	18	FGAFGKD	740.349	4.0038	3000	5	5	0.334	6.679	0.155	3	Medium	0.062	0.035172
	MelB_Na	MELB	15	19	FGKDF	612.291	3.5799	0	3	0	0	0	n/a	1	High	0
	MelB_Na	MELB	15	19	FGKDF	612.291	3.5654	30	3	2.999	0.061	2.038	0.057	3	Medium	0.023	0.40545
	MelB_Na	MELB	15	19	FGKDF	612.291	3.596	300	3	3	0.108	3.607	0.088	3	Medium	0.036	0.0012474
	MelB_Na	MELB	15	19	FGKDF	612.291	3.6027	3000	3	3	0.23	7.672	0.075	3	Medium	0.03	0.327005
	MelB_Na	MELB	18	22	DFAIG	521.249	4.9601	0	3	0	0	0	n/a	1	Medium	0
	MelB_Na	MELB	18	22	DFAIG	521.249	4.9257	30	3	2.964	0.206	6.874	0.159	3	Medium	0.064	0.831173
	MelB_Na	MELB	18	22	DFAIG	521.249	4.9259	300	3	3	0.181	6.04	0.231	3	Medium	0.093	0.0309361
	MelB_Na	MELB	18	22	DFAIG	521.249	4.9214	3000	3	3	0.213	7.104	0.205	3	Medium	0.083	0.407463
	MelB_Na	MELB	20	25	AIGIVY	634.369	5.5528	0	4	0	0	0	n/a	1	Medium	0
	MelB_Na	MELB	20	25	AIGIVY	634.369	5.5636	30	4	3.868	0.118	2.939	0.079	3	Medium	0.032	0.0144699
	MelB_Na	MELB	20	25	AIGIVY	634.369	5.5523	300	4	4	0.154	3.862	0.078	3	Medium	0.032	0.0378193
	MelB_Na	MELB	20	25	AIGIVY	634.369	5.5357	3000	4	4	0.309	7.714	0	3	Medium	0	0.405391
	MelB_Na	MELB	23	25	IVY	393.226	3.2056	0	1	0	0	0	n/a	1	Medium	0
	MelB_Na	MELB	23	25	IVY	393.226	3.1981	30	1	0.999	0.067	6.75	0.157	3	Medium	0.063	0.636389
	MelB_Na	MELB	23	25	IVY	393.226	3.1746	300	1	1	0.098	9.828	0.167	3	Medium	0.067	0.708268
	MelB_Na	MELB	23	25	IVY	393.226	3.1853	3000	1	1	0.055	5.48	0.071	3	Medium	0.029	0.52281
	MelB_Na	MELB	23	28	IVYMYL	800.414	8.4439	0	4	0	0	0	n/a	1	High	0
	MelB_Na	MELB	23	28	IVYMYL	800.414	8.4769	30	4	3.994	0.039	0.963	0.008	3	High	0.003	0.000341776
	MelB_Na	MELB	23	28	IVYMYL	800.414	8.4784	300	4	4	0.059	1.484	0.022	3	High	0.009	0.116001
	MelB_Na	MELB	23	28	IVYMYL	800.414	8.4742	3000	4	4	0.109	2.734	0.023	3	High	0.009	0.68541
	MelB_Na	MELB	26	28	MYL	425.198	5.5581	0	1	0	0	0	n/a	1	High	0
	MelB_Na	MELB	26	28	MYL	425.198	5.5617	30	1	0.995	0.005	0.506	0.006	3	High	0.003	0.344967
	MelB_Na	MELB	26	28	MYL	425.198	5.5431	300	1	1	0.002	0.243	0.008	3	High	0.003	0.560964
	MelB_Na	MELB	26	28	MYL	425.198	5.5249	3000	1	1	0.001	0.053	0.011	3	Medium	0.004	0.280495
	MelB_Na	MELB	29	31	MYY	475.178	4.2235	0	1	0	0	0	n/a	1	Medium	0
	MelB_Na	MELB	29	31	MYY	475.178	4.1883	30	1	1	0.028	2.753	0.041	3	Medium	0.016	0.302018
	MelB_Na	MELB	29	31	MYY	475.178	4.1723	300	1	1	0.026	2.583	0.053	3	Medium	0.021	0.341444
	MelB_Na	MELB	29	31	MYY	475.178	4.164	3000	1	1	0.011	1.117	0.067	3	Medium	0.027	0.186932
	MelB_Na	MELB	29	34	MYYYTD	854.316	4.5688	0	4	0	0	0	n/a	1	High	0
	MelB_Na	MELB	29	34	MYYYTD	854.316	4.6004	30	4	4	0.041	1.037	0.002	3	High	0.001	0.539699
	MelB_Na	MELB	29	34	MYYYTD	854.316	4.6124	300	4	4	0.043	1.069	0.016	3	High	0.006	0.00212395
	MelB_Na	MELB	29	34	MYYYTD	854.316	4.6259	3000	4	4	0.051	1.277	0.024	3	High	0.01	0.302352
	MelB_Na	MELB	35	46	VVGLSVGLVGTL	1112.68	8.2186	0	10	0	0	0	n/a	1	Medium	0
	MelB_Na	MELB	35	46	VVGLSVGLVGTL	1112.68	8.2225	30	10	9.885	0.268	2.678	0.017	3	Medium	0.007	1.01832
	MelB_Na	MELB	35	46	VVGLSVGLVGTL	1112.68	8.2063	300	10	10	0.33	3.295	0.088	3	Medium	0.036	0.0597738
	MelB_Na	MELB	35	46	VVGLSVGLVGTL	1112.68	8.1414	3000	10	10	0.452	4.52	0.209	3	Medium	0.084	0.0893392
	MelB_Na	MELB	42	46	LVGTL	501.316	3.9808	0	3	0	0	0	n/a	1	Medium	0
	MelB_Na	MELB	42	46	LVGTL	501.316	4.0237	30	3	2.999	0.017	0.566	0.01	3	Medium	0.004	0.126995
	MelB_Na	MELB	42	46	LVGTL	501.316	3.9977	300	3	3	0.016	0.529	0.005	3	Medium	0.002	0.836932
	MelB_Na	MELB	42	46	LVGTL	501.316	3.9998	3000	3	3	0.017	0.577	0.024	3	Medium	0.01	0.337037
	MelB_Na	MELB	47	51	FLVAR	604.37	2.6827	0	3	0	0	0	n/a	1	Medium	0
	MelB_Na	MELB	47	51	FLVAR	604.37	2.725	30	3	2.888	0.006	0.199	0.026	3	High	0.01	0.561293
	MelB_Na	MELB	47	51	FLVAR	604.37	2.7262	300	3	3	0.007	0.246	0.015	3	High	0.006	0.719734
	MelB_Na	MELB	47	51	FLVAR	604.37	2.7489	3000	3	3	0	0.005	0.001	3	Medium	0	0.0176166
	MelB_Na	MELB	47	53	FLVARIW	903.533	7.7147	0	5	0	0	0	n/a	1	High	0
	MelB_Na	MELB	47	53	FLVARIW	903.533	7.6924	30	5	4.867	0.016	0.321	0.009	3	High	0.004	0.0716106
	MelB_Na	MELB	47	53	FLVARIW	903.533	7.6816	300	5	5	0.019	0.388	0.005	3	High	0.002	0.0153238
	MelB_Na	MELB	47	53	FLVARIW	903.533	7.6994	3000	5	5	0.026	0.511	0.017	3	High	0.007	0.724588
	MelB_Na	MELB	48	53	LVARIW	756.465	5.7224	0	4	0	0	0	n/a	1	High	0
	MelB_Na	MELB	48	53	LVARIW	756.465	5.765	30	4	3.979	0.008	0.209	0.02	3	Medium	0.008	0.377443
	MelB_Na	MELB	48	53	LVARIW	756.465	5.7895	300	4	4	0.009	0.215	0.014	3	Medium	0.006	0.413322
	MelB_Na	MELB	48	53	LVARIW	756.465	5.7612	3000	4	4	0.007	0.177	0.006	3	Medium	0.002	0.0448351
	MelB_Na	MELB	49	53	VARIW	643.381	4.7377	0	3	0	0	0	n/a	1	High	0
	MelB_Na	MELB	49	53	VARIW	643.381	4.7778	30	3	2.979	0.016	0.543	0.023	3	High	0.009	0.296417
	MelB_Na	MELB	49	53	VARIW	643.381	4.7631	300	3	3	0.022	0.75	0.015	3	High	0.006	0.934386
	MelB_Na	MELB	49	53	VARIW	643.381	4.7438	3000	3	3	0.026	0.863	0.025	3	High	0.01	0.33916
	MelB_Na	MELB	52	61	IWDAINDPIM	1186.57	8.1592	0	7	0	0	0	n/a	1	High	0
	MelB_Na	MELB	52	61	IWDAINDPIM	1186.57	8.1689	30	7	6.817	0.031	0.439	0.006	3	High	0.002	0.00999044
	MelB_Na	MELB	52	61	IWDAINDPIM	1186.57	8.1582	300	7	7	0.039	0.554	0.018	3	High	0.007	0.0225056
	MelB_Na	MELB	52	61	IWDAINDPIM	1186.57	8.1673	3000	7	7	0.052	0.742	0.004	3	High	0.002	0.277245
	MelB_Na	MELB	52	66	IWDAINDPIMGWIVN	1755.87	10.943	0	12	0	0	0	n/a	1	High	0
	MelB_Na	MELB	52	66	IWDAINDPIMGWIVN	1755.87	10.9243	30	12	11.617	0.048	0.398	0.014	3	High	0.006	0.0194484
	MelB_Na	MELB	52	66	IWDAINDPIMGWIVN	1755.87	10.9111	300	12	12	0.057	0.473	0.018	3	High	0.007	0.0577128
	MelB_Na	MELB	52	66	IWDAINDPIMGWIVN	1755.87	10.9055	3000	12	12	0.125	1.038	0.013	3	High	0.005	0.266092
	MelB_Na	MELB	54	65	DAINDPIMGWIV	1342.66	10.5697	0	9	0	0	0	n/a	1	High	0
	MelB_Na	MELB	54	65	DAINDPIMGWIV	1342.66	10.5848	30	9	8.617	0.02	0.221	0.004	3	High	0.002	0.0381399
	MelB_Na	MELB	54	65	DAINDPIMGWIV	1342.66	10.6031	300	9	9	0.031	0.343	0.007	3	High	0.003	0.0261921
	MelB_Na	MELB	54	65	DAINDPIMGWIV	1342.66	10.5921	3000	9	9	0.052	0.582	0.01	3	High	0.004	0.193458
	MelB_Na	MELB	58	65	DPIMGWIV	929.468	9.8469	0	6	0	0	0	n/a	1	High	0
	MelB_Na	MELB	58	65	DPIMGWIV	929.468	9.8206	30	6	5.653	0.042	0.693	0.105	3	High	0.042	0.874746
	MelB_Na	MELB	58	65	DPIMGWIV	929.468	9.8255	300	6	6	0.039	0.649	0.067	3	High	0.027	0.383436
	MelB_Na	MELB	58	65	DPIMGWIV	929.468	9.8419	3000	6	6	0.025	0.412	0.005	3	High	0.002	0.250931
	MelB_Na	MELB	67	76	ATRSRWGKFK	1235.69	1.782	0	8	0	0	0	n/a	1	Medium	0
	MelB_Na	MELB	67	76	ATRSRWGKFK	1235.69	1.8076	30	8	8	0.122	1.522	0.268	3	Medium	0.108	0.467637
	MelB_Na	MELB	67	76	ATRSRWGKFK	1235.69	1.7983	300	8	8	0.162	2.02	0.568	3	Medium	0.229	0.180479
	MelB_Na	MELB	67	76	ATRSRWGKFK	1235.69	1.9138	3000	8	8	0.237	2.966	0	2	Medium	0	0.142164
	MelB_Na	MELB	70	76	SRWGKFK	907.503	2.2042	0	5	0	0	0	n/a	1	Medium	0
	MelB_Na	MELB	70	76	SRWGKFK	907.503	2.2808	30	5	5	0.024	0.478	0.047	3	Medium	0.019	0.0229813
	MelB_Na	MELB	70	76	SRWGKFK	907.503	2.2855	300	5	5	0.039	0.771	0.058	3	Medium	0.023	0.165027
	MelB_Na	MELB	70	76	SRWGKFK	907.503	2.3375	3000	5	5	0.13	2.596	0.013	3	Medium	0.005	0.750854
	MelB_Na	MELB	72	76	WGKFK	664.37	2.7275	0	3	0	0	0	n/a	1	Medium	0
	MelB_Na	MELB	72	76	WGKFK	664.37	2.7341	30	3	3	0.015	0.507	0.027	3	Medium	0.011	0.00583778
	MelB_Na	MELB	72	76	WGKFK	664.37	2.7477	300	3	3	0.075	2.486	0.149	3	Medium	0.06	0.130744
	MelB_Na	MELB	72	76	WGKFK	664.37	2.7644	3000	3	3	0.257	8.558	0.085	3	Medium	0.034	0.601747
	MelB_Na	MELB	75	80	FKPWIL	802.474	8.3898	0	3	0	0	0	n/a	1	High	0
	MelB_Na	MELB	75	80	FKPWIL	802.474	8.403	30	3	2.845	0.016	0.518	0.017	3	High	0.007	0.422632
	MelB_Na	MELB	75	80	FKPWIL	802.474	8.3989	300	3	3	0.009	0.298	0.042	3	High	0.017	0.0555566
	MelB_Na	MELB	75	80	FKPWIL	802.474	8.3976	3000	3	3	0.075	2.486	0.016	3	High	0.006	0.153138
	MelB_Na	MELB	81	88	IGTLTNSL	817.455	5.0497	0	6	0	0	0	n/a	1	Medium	0
	MelB_Na	MELB	81	88	IGTLTNSL	817.455	5.0527	30	6	5.999	0.028	0.471	0.009	3	High	0.004	0.177312
	MelB_Na	MELB	81	88	IGTLTNSL	817.455	5.0458	300	6	6	0.039	0.657	0.01	3	High	0.004	0.0873319
	MelB_Na	MELB	81	88	IGTLTNSL	817.455	5.0398	3000	6	6	0.054	0.905	0.001	3	High	0	0.282011
	MelB_Na	MELB	81	90	IGTLTNSLVL	1029.61	7.267	0	8	0	0	0	n/a	1	Medium	0
	MelB_Na	MELB	81	90	IGTLTNSLVL	1029.61	7.3289	30	8	7.855	0.016	0.2	0.012	3	Medium	0.005	0.441565
	MelB_Na	MELB	81	90	IGTLTNSLVL	1029.61	7.3192	300	8	8	0.019	0.244	0.011	3	Medium	0.005	0.0718317
	MelB_Na	MELB	81	90	IGTLTNSLVL	1029.61	7.3181	3000	8	8	0.031	0.39	0.001	3	Medium	0	0.154332
	MelB_Na	MELB	92	97	LLFSAH	686.375	4.733	0	4	0	0	0	n/a	1	Medium	0
	MelB_Na	MELB	92	97	LLFSAH	686.375	6.8111	30	4	3.998	3.433	85.823	0.001	3	Medium	0	0.315403
	MelB_Na	MELB	92	97	LLFSAH	686.375	6.8076	300	4	4	3.437	85.915	0.009	3	Medium	0.004	0.0420246
	MelB_Na	MELB	92	97	LLFSAH	686.375	6.7904	3000	4	4	3.449	86.233	0.004	3	Medium	0.002	0.996114
	MelB_Na	MELB	92	98	LLFSAHL	799.459	6.7833	0	5	0	0	0	n/a	1	Medium	0
	MelB_Na	MELB	92	98	LLFSAHL	799.459	6.7839	30	5	4.998	0.031	0.621	0.038	3	Medium	0.015	0.442334
	MelB_Na	MELB	92	98	LLFSAHL	799.459	6.8018	300	5	5	0.017	0.339	0.017	3	Medium	0.007	0.222955
	MelB_Na	MELB	92	98	LLFSAHL	799.459	6.7891	3000	5	5	0.056	1.126	0.036	3	Medium	0.015	0.295911
	MelB_Na	MELB	93	99	LFSAHLF	833.444	7.2355	0	5	0	0	0	n/a	1	Medium	0
	MelB_Na	MELB	93	99	LFSAHLF	833.444	7.215	30	5	4.998	0.015	0.303	0.017	3	Medium	0.007	0.806884
	MelB_Na	MELB	93	99	LFSAHLF	833.444	7.2021	300	5	5	0.016	0.314	0.008	3	Medium	0.003	0.00744249
	MelB_Na	MELB	93	99	LFSAHLF	833.444	7.226	3000	5	5	0.039	0.787	0.002	3	Medium	0.001	0.902666
	MelB_Na	MELB	94	99	FSAHLF	720.36	6.1753	0	4	0	0	0	n/a	1	High	0
	MelB_Na	MELB	94	99	FSAHLF	720.36	6.1886	30	4	3.998	0.03	0.745	0.003	3	Medium	0.001	0.580123
	MelB_Na	MELB	94	99	FSAHLF	720.36	6.1707	300	4	4	0.032	0.79	0.005	3	High	0.002	0.0523186
	MelB_Na	MELB	94	99	FSAHLF	720.36	6.1712	3000	4	4	0.044	1.092	0.006	3	High	0.002	0.332049
	MelB_Na	MELB	98	106	LFEGTAQVV	962.507	5.118	0	7	0	0	0	n/a	1	Medium	0
	MelB_Na	MELB	98	106	LFEGTAQVV	962.507	5.1442	30	7	6.92	0.061	0.872	0.027	3	Medium	0.011	0.634665
	MelB_Na	MELB	98	106	LFEGTAQVV	962.507	5.1527	300	7	7	0.081	1.151	0.02	3	Medium	0.008	0.221356
	MelB_Na	MELB	98	106	LFEGTAQVV	962.507	5.1492	3000	7	7	0.147	2.101	0.085	3	Medium	0.034	0.2369
	MelB_Na	MELB	100	106	EGTAQVV	702.355	2.2568	0	5	0	0	0	n/a	1	Medium	0
	MelB_Na	MELB	100	106	EGTAQVV	702.355	2.2988	30	5	4.92	-0.026	-0.525	0.015	3	Medium	0.006	0.89045
	MelB_Na	MELB	100	106	EGTAQVV	702.355	2.2854	300	5	5	0.003	0.069	0.045	3	Medium	0.018	0.103284
	MelB_Na	MELB	100	106	EGTAQVV	702.355	2.2915	3000	5	5	0.029	0.579	0.02	3	Medium	0.008	0.0170412
	MelB_Na	MELB	100	109	EGTAQVVFVC	1051.5	6.4519	0	8	0	0	0	n/a	1	High	0
	MelB_Na	MELB	100	109	EGTAQVVFVC	1051.5	6.4354	30	8	7.903	-0.045	-0.562	0.042	3	High	0.017	0.209532
	MelB_Na	MELB	100	109	EGTAQVVFVC	1051.5	6.4326	300	8	8	0.004	0.049	0.028	3	High	0.011	0.0163423
	MelB_Na	MELB	100	109	EGTAQVVFVC	1051.5	6.4514	3000	8	8	0.011	0.141	0.144	3	High	0.058	0.243028
	MelB_Na	MELB	119	122	YTIM	526.246	4.8279	0	2	0	0	0	n/a	1	High	0
	MelB_Na	MELB	119	122	YTIM	526.246	4.848	30	2	1.995	0.014	0.717	0.003	3	High	0.001	0.986798
	MelB_Na	MELB	119	122	YTIM	526.246	4.8415	300	2	2	0.016	0.792	0.01	3	High	0.004	0.233332
	MelB_Na	MELB	119	122	YTIM	526.246	4.8226	3000	2	2	0.014	0.692	0.008	3	High	0.003	0.148812
	MelB_Na	MELB	120	129	TIMDIPFWSL	1221.61	11.5535	0	7	0	0	0	n/a	1	High	0
	MelB_Na	MELB	120	129	TIMDIPFWSL	1221.61	11.5457	30	7	6.889	0.027	0.392	0.04	3	High	0.016	0.393214
	MelB_Na	MELB	120	129	TIMDIPFWSL	1221.61	11.539	300	7	7	0.035	0.501	0.036	3	Medium	0.014	0.0238568
	MelB_Na	MELB	120	129	TIMDIPFWSL	1221.61	11.5355	3000	7	7	0.068	0.975	0.005	3	High	0.002	0.336947
	MelB_Na	MELB	123	129	DIPFWSL	876.438	10.3845	0	4	0	0	0	n/a	1	Medium	0
	MelB_Na	MELB	123	129	DIPFWSL	876.438	10.4148	30	4	3.997	0.01	0.247	0.008	3	Medium	0.003	0.0279866
	MelB_Na	MELB	123	129	DIPFWSL	876.438	10.3956	300	4	4	0.014	0.349	0.014	3	Medium	0.006	0.0369308
	MelB_Na	MELB	123	129	DIPFWSL	876.438	10.3939	3000	4	4	0.024	0.592	0.006	3	Medium	0.003	0.233602
	MelB_Na	MELB	124	129	IPFWSL	761.411	10.0469	0	4	0	0	0	n/a	1	High	0
	MelB_Na	MELB	124	129	IPFWSL	761.411	10.0288	30	4	3.997	0.009	0.235	0.011	3	High	0.005	0.0296564
	MelB_Na	MELB	124	129	IPFWSL	761.411	10.0348	300	4	4	0.012	0.306	0.01	3	High	0.004	0.0255472
	MelB_Na	MELB	124	129	IPFWSL	761.411	10.0183	3000	4	4	0.033	0.833	0.001	3	High	0	0.308188
	MelB_Na	MELB	130	135	VPTITL	642.395	6.0491	0	4	0	0	0	n/a	1	Medium	0
	MelB_Na	MELB	130	135	VPTITL	642.395	4.7778	30	4	3.994	1.182	29.542	0.022	3	Medium	0.009	0.266164
	MelB_Na	MELB	130	135	VPTITL	642.395	4.7649	300	4	4	1.189	29.719	0.016	3	Medium	0.006	0.795901
	MelB_Na	MELB	130	135	VPTITL	642.395	4.7438	3000	4	4	1.193	29.828	0.028	3	Medium	0.011	0.289889
	MelB_Na	MELB	130	137	VPTITLDK	885.517	3.6374	0	6	0	0	0	n/a	1	Medium	0
	MelB_Na	MELB	130	137	VPTITLDK	885.517	3.6284	30	6	5.994	0.074	1.239	0.117	3	Medium	0.047	0.0211854
	MelB_Na	MELB	130	137	VPTITLDK	885.517	3.6189	300	6	6	0.139	2.312	0.279	3	Medium	0.112	0.0658942
	MelB_Na	MELB	130	137	VPTITLDK	885.517	3.6346	3000	6	6	0.492	8.195	0.059	3	Medium	0.024	0.511105
	MelB_Na	MELB	136	149	DKREREQLVPFPRF	1815.97	5.9509	0	10	0	0	0	n/a	1	High	0
	MelB_Na	MELB	136	149	DKREREQLVPFPRF	1815.97	5.995	30	10	9.885	0.198	1.98	0.291	3	High	0.117	0.0563632
	MelB_Na	MELB	136	149	DKREREQLVPFPRF	1815.97	5.9858	300	10	10	0.386	3.858	0.613	3	High	0.247	0.0481445
	MelB_Na	MELB	136	149	DKREREQLVPFPRF	1815.97	5.9955	3000	10	10	1.517	15.17	0.588	3	Medium	0.237	0.86694
	MelB_Na	MELB	138	149	REREQLVPFPRF	1572.85	6.1247	0	8	0	0	0	n/a	1	High	0
	MelB_Na	MELB	138	149	REREQLVPFPRF	1572.85	6.0967	30	8	7.885	0.095	1.191	0.118	3	High	0.048	0.011335
	MelB_Na	MELB	138	149	REREQLVPFPRF	1572.85	6.1143	300	8	8	0.19	2.378	0.287	3	High	0.115	0.0123401
	MelB_Na	MELB	138	149	REREQLVPFPRF	1572.85	6.1069	3000	8	8	0.866	10.823	0.411	3	High	0.165	0.68922
	MelB_Na	MELB	139	149	EREQLVPFPRF	1416.75	6.9006	0	7	0	0	0	n/a	1	Medium	0
	MelB_Na	MELB	139	149	EREQLVPFPRF	1416.75	6.8865	30	7	6.885	0.117	1.67	0.128	3	Medium	0.051	0.0126536
	MelB_Na	MELB	139	149	EREQLVPFPRF	1416.75	6.8298	300	7	7	0.223	3.181	0.295	3	Medium	0.119	0.0141579
	MelB_Na	MELB	139	149	EREQLVPFPRF	1416.75	6.8361	3000	7	7	0.978	13.975	0.448	3	Medium	0.18	0.588132
	MelB_Na	MELB	139	150	EREQLVPFPRFF	1563.82	8.3578	0	8	0	0	0	n/a	1	Medium	0
	MelB_Na	MELB	139	150	EREQLVPFPRFF	1563.82	8.3287	30	8	7.885	0.113	1.41	0.126	3	Medium	0.051	0.00509496
	MelB_Na	MELB	139	150	EREQLVPFPRFF	1563.82	8.3565	300	8	8	0.244	3.048	0.284	3	Medium	0.114	0.00967031
	MelB_Na	MELB	139	150	EREQLVPFPRFF	1563.82	8.4049	3000	8	8	1.034	12.92	0.483	3	Medium	0.195	0.68565
	MelB_Na	MELB	140	149	REQLVPFPRF	1287.71	6.8248	0	6	0	0	0	n/a	1	High	0
	MelB_Na	MELB	140	149	REQLVPFPRF	1287.71	6.8127	30	6	5.885	0.07	1.163	0.097	3	Medium	0.039	0.012373
	MelB_Na	MELB	140	149	REQLVPFPRF	1287.71	6.7988	300	6	6	0.148	2.467	0.191	3	Medium	0.077	0.00964172
	MelB_Na	MELB	140	149	REQLVPFPRF	1287.71	6.7989	3000	6	6	0.668	11.127	0.443	3	Medium	0.178	0.642322
	MelB_Na	MELB	141	149	EQLVPFPRF	1131.61	7.752	0	5	0	0	0	n/a	1	Medium	0
	MelB_Na	MELB	141	149	EQLVPFPRF	1131.61	7.7239	30	5	4.885	0.065	1.3	0.067	3	Medium	0.027	0.00193347
	MelB_Na	MELB	141	149	EQLVPFPRF	1131.61	7.7069	300	5	5	0.132	2.634	0.174	3	Medium	0.07	0.00674307
	MelB_Na	MELB	141	149	EQLVPFPRF	1131.61	7.7373	3000	5	5	0.56	11.202	0.251	3	Medium	0.101	0.267637
	MelB_Na	MELB	141	150	EQLVPFPRFF	1278.68	9.3429	0	6	0	0	0	n/a	1	High	0
	MelB_Na	MELB	141	150	EQLVPFPRFF	1278.68	9.2827	30	6	5.885	0.062	1.028	0.054	3	Medium	0.022	0.000474233
	MelB_Na	MELB	141	150	EQLVPFPRFF	1278.68	9.2791	300	6	6	0.136	2.258	0.161	3	Medium	0.065	0.00526827
	MelB_Na	MELB	141	150	EQLVPFPRFF	1278.68	9.3241	3000	6	6	0.605	10.085	0.201	3	Medium	0.081	0.246211
	MelB_Na	MELB	142	149	QLVPFPRF	1002.57	7.6458	0	4	0	0	0	n/a	1	High	0
	MelB_Na	MELB	142	149	QLVPFPRF	1002.57	7.6668	30	4	3.885	0.021	0.531	0.05	3	High	0.02	0.00339369
	MelB_Na	MELB	142	149	QLVPFPRF	1002.57	7.6729	300	4	4	0.077	1.916	0.117	3	High	0.047	0.0135156
	MelB_Na	MELB	142	149	QLVPFPRF	1002.57	7.6842	3000	4	4	0.329	8.214	0.128	3	High	0.052	0.247143
	MelB_Na	MELB	143	149	LVPFPRF	874.506	7.4483	0	3	0	0	0	n/a	1	Medium	0
	MelB_Na	MELB	143	149	LVPFPRF	874.506	7.4984	30	3	2.997	0.025	0.821	0.038	3	Medium	0.015	0.00734452
	MelB_Na	MELB	143	149	LVPFPRF	874.506	7.4639	300	3	3	0.059	1.975	0.085	3	Medium	0.034	0.00974154
	MelB_Na	MELB	143	149	LVPFPRF	874.506	7.4934	3000	3	3	0.299	9.973	0.126	3	Medium	0.051	0.385709
	MelB_Na	MELB	150	155	FASLAG	564.291	3.6697	0	4	0	0	0	n/a	1	Medium	0
	MelB_Na	MELB	150	155	FASLAG	564.291	3.6938	30	4	4	0.297	7.437	0.352	3	Medium	0.142	0.596401
	MelB_Na	MELB	150	155	FASLAG	564.291	3.7145	300	4	4	0.204	5.091	0.229	3	Medium	0.092	0.470385
	MelB_Na	MELB	150	155	FASLAG	564.291	3.7195	3000	4	4	0.583	14.563	0.193	3	Medium	0.078	0.142723
	MelB_Na	MELB	153	158	LAGFVT	606.338	5.0443	0	4	0	0	0	n/a	1	Medium	0
	MelB_Na	MELB	153	158	LAGFVT	606.338	5.0256	30	4	3.983	0.072	1.806	0.067	3	Medium	0.027	0.038641
	MelB_Na	MELB	153	158	LAGFVT	606.338	5.0081	300	4	4	0.138	3.459	0.132	3	Medium	0.053	0.0466732
	MelB_Na	MELB	153	158	LAGFVT	606.338	4.9879	3000	4	4	0.522	13.045	0.14	3	Medium	0.056	0.500067
	MelB_Na	MELB	154	168	AGFVTAGITLPFVSY	1541.81	9.8362	0	12	0	0	0	n/a	1	High	0
	MelB_Na	MELB	154	168	AGFVTAGITLPFVSY	1541.81	9.8727	30	12	11.956	0.076	0.631	0.082	3	High	0.033	0.00414283
	MelB_Na	MELB	154	168	AGFVTAGITLPFVSY	1541.81	9.8715	300	12	12	0.175	1.455	0.217	3	High	0.087	0.00647367
	MelB_Na	MELB	154	168	AGFVTAGITLPFVSY	1541.81	9.8621	3000	12	12	0.372	3.1	0.012	3	High	0.005	0.0359139
	MelB_Na	MELB	156	163	FVTAGITL	820.47	6.8511	0	6	0	0	0	n/a	1	Medium	0
	MelB_Na	MELB	156	163	FVTAGITL	820.47	6.8714	30	6	5.992	0.086	1.428	0.143	3	Medium	0.058	0.118764
	MelB_Na	MELB	156	163	FVTAGITL	820.47	6.8825	300	6	6	0.038	0.629	0.238	3	Medium	0.096	0.231965
	MelB_Na	MELB	156	163	FVTAGITL	820.47	6.8811	3000	6	6	0.055	0.919	0.118	3	Medium	0.047	0.227141
	MelB_Na	MELB	157	168	VTAGITLPFVSY	1266.69	8.7686	0	9	0	0	0	n/a	1	Medium	0
	MelB_Na	MELB	157	168	VTAGITLPFVSY	1266.69	8.7685	30	9	8.973	0.028	0.315	0.031	3	Medium	0.012	0.00198629
	MelB_Na	MELB	157	168	VTAGITLPFVSY	1266.69	8.759	300	9	9	0.082	0.908	0.096	3	Medium	0.039	0.00860774
	MelB_Na	MELB	157	168	VTAGITLPFVSY	1266.69	8.7873	3000	9	9	0.141	1.569	0.051	3	Medium	0.02	0.0769657
	MelB_Na	MELB	159	168	AGITLPFVSY	1066.57	8.8162	0	7	0	0	0	n/a	1	High	0
	MelB_Na	MELB	159	168	AGITLPFVSY	1066.57	8.7592	30	7	6.973	0.051	0.735	0.065	3	Medium	0.026	0.0173416
	MelB_Na	MELB	159	168	AGITLPFVSY	1066.57	8.8296	300	7	7	0.095	1.359	0.119	3	High	0.048	0.0128275
	MelB_Na	MELB	159	168	AGITLPFVSY	1066.57	8.8403	3000	7	7	0.169	2.409	0.049	3	High	0.02	0.0302909
	MelB_Na	MELB	169	177	VGGADRGFG	834.398	2.3466	0	7	0	0	0	n/a	1	Medium	0
	MelB_Na	MELB	169	177	VGGADRGFG	834.398	2.4235	30	7	7	-0.095	-1.359	0.052	3	Medium	0.021	0.073381
	MelB_Na	MELB	169	177	VGGADRGFG	834.398	2.4452	300	7	7	-0.114	-1.632	0.16	3	Medium	0.064	0.0467179
	MelB_Na	MELB	169	177	VGGADRGFG	834.398	2.4577	3000	7	7	-0.038	-0.542	0.067	3	Medium	0.027	0.16885
	MelB_Na	MELB	169	180	VGGADRGFGFQM	1240.57	6.6104	0	10	0	0	0	n/a	1	Medium	0
	MelB_Na	MELB	169	180	VGGADRGFGFQM	1240.57	6.6012	30	10	10	0.036	0.365	0.038	3	Medium	0.015	0.00636653
	MelB_Na	MELB	169	180	VGGADRGFGFQM	1240.57	6.6016	300	10	10	0.056	0.557	0.077	3	Medium	0.031	0.0285019
	MelB_Na	MELB	169	180	VGGADRGFGFQM	1240.57	6.612	3000	10	10	0.152	1.525	0.084	3	Medium	0.034	0.373988
	MelB_Na	MELB	174	180	RGFGFQM	841.39	6.5103	0	5	0	0	0	n/a	1	Medium	0
	MelB_Na	MELB	174	180	RGFGFQM	841.39	6.5081	30	5	5	0.016	0.327	0.018	3	Medium	0.007	0.624345
	MelB_Na	MELB	174	180	RGFGFQM	841.39	6.5068	300	5	5	0.017	0.332	0.028	3	Medium	0.011	0.0346387
	MelB_Na	MELB	174	180	RGFGFQM	841.39	6.5382	3000	5	5	0.03	0.599	0.005	3	Medium	0.002	0.646073
	MelB_Na	MELB	184	187	VLIA	414.284	3.3589	0	2	0	0	0	n/a	1	Medium	0
	MelB_Na	MELB	184	187	VLIA	414.284	3.4014	30	2	1.871	0.005	0.245	0.01	3	Medium	0.004	0.120488
	MelB_Na	MELB	184	187	VLIA	414.284	3.3865	300	2	2	0.002	0.076	0.005	3	Medium	0.002	0.485833
	MelB_Na	MELB	184	187	VLIA	414.284	3.3784	3000	2	2	-0.001	-0.029	0.013	3	Medium	0.005	0.746359
	MelB_Na	MELB	186	191	IAFFIA	680.39	8.6823	0	4	0	0	0	n/a	1	Medium	0
	MelB_Na	MELB	186	191	IAFFIA	680.39	8.6639	30	4	3.979	-0.006	-0.151	0.022	3	Medium	0.009	0.121655
	MelB_Na	MELB	186	191	IAFFIA	680.39	8.6617	300	4	4	-0.001	-0.02	0.027	3	Medium	0.011	0.517716
	MelB_Na	MELB	186	191	IAFFIA	680.39	8.6601	3000	4	4	0.006	0.141	0.014	3	Medium	0.006	0.079219
	MelB_Na	MELB	190	198	IASTIVTLR	972.597	3.9385	0	7	0	0	0	n/a	1	Medium	0
	MelB_Na	MELB	190	198	IASTIVTLR	972.597	3.8604	30	7	6.871	0.014	0.196	0.026	3	Medium	0.011	0.360406
	MelB_Na	MELB	190	198	IASTIVTLR	972.597	3.8759	300	7	7	0.022	0.321	0.036	3	Medium	0.015	0.0223485
	MelB_Na	MELB	190	198	IASTIVTLR	972.597	3.885	3000	7	7	0.07	0.996	0.055	3	Medium	0.022	0.444231
	MelB_Na	MELB	192	198	STIVTLR	788.476	3.0198	0	5	0	0	0	n/a	1	Medium	0
	MelB_Na	MELB	192	198	STIVTLR	788.476	3.0366	30	5	4.871	0.035	0.696	0.013	3	Medium	0.005	0.279016
	MelB_Na	MELB	192	198	STIVTLR	788.476	3.0529	300	5	5	0.038	0.753	0.007	3	Medium	0.003	0.0430351
	MelB_Na	MELB	192	198	STIVTLR	788.476	3.0193	3000	5	5	0.043	0.863	0.017	3	Medium	0.007	0.222237
	MelB_Na	MELB	192	199	STIVTLRN	902.519	2.7117	0	6	0	0	0	n/a	1	Medium	0
	MelB_Na	MELB	192	199	STIVTLRN	902.519	2.6474	30	6	5.871	0.203	3.385	0.22	3	Medium	0.089	0.566544
	MelB_Na	MELB	192	199	STIVTLRN	902.519	2.6615	300	6	6	0.188	3.137	0.189	3	Medium	0.076	0.824425
	MelB_Na	MELB	192	199	STIVTLRN	902.519	2.6402	3000	6	6	0.205	3.424	0.028	3	Medium	0.011	0.473367
	MelB_Na	MELB	192	200	STIVTLRNV	1001.59	4.4955	0	7	0	0	0	n/a	1	Medium	0
	MelB_Na	MELB	192	200	STIVTLRNV	1001.59	4.5053	30	7	6.87	0.054	0.771	0.022	3	Medium	0.009	0.634952
	MelB_Na	MELB	192	200	STIVTLRNV	1001.59	4.4966	300	7	7	0.064	0.913	0.035	3	Medium	0.014	0.0130845
	MelB_Na	MELB	192	200	STIVTLRNV	1001.59	4.4733	3000	7	7	0.098	1.398	0.013	3	Medium	0.005	0.365242
	MelB_Na	MELB	192	201	STIVTLRNVH	1138.65	2.8416	0	8	0	0	0	n/a	1	Medium	0
	MelB_Na	MELB	192	201	STIVTLRNVH	1138.65	2.8356	30	8	7.87	0.002	0.027	0.012	3	Medium	0.005	0.0155405
	MelB_Na	MELB	192	201	STIVTLRNVH	1138.65	2.8397	300	8	8	0.018	0.229	0.031	3	Medium	0.012	0.0174094
	MelB_Na	MELB	192	201	STIVTLRNVH	1138.65	2.8483	3000	8	8	0.059	0.74	0.05	3	Medium	0.02	0.341093
	MelB_Na	MELB	192	203	STIVTLRNVHEV	1366.76	3.9623	0	10	0	0	0	n/a	1	High	0
	MelB_Na	MELB	192	203	STIVTLRNVHEV	1366.76	3.9685	30	10	9.792	0.054	0.54	0.016	3	High	0.006	0.0053245
	MelB_Na	MELB	192	203	STIVTLRNVHEV	1366.76	3.9433	300	10	10	0.081	0.814	0.091	3	High	0.036	0.140183
	MelB_Na	MELB	192	203	STIVTLRNVHEV	1366.76	3.9496	3000	10	10	0.229	2.295	0.051	3	High	0.021	0.570023
	MelB_Na	MELB	192	204	STIVTLRNVHEVY	1529.82	4.5582	0	11	0	0	0	n/a	1	Medium	0
	MelB_Na	MELB	192	204	STIVTLRNVHEVY	1529.82	4.5562	30	11	10.791	-0.288	-2.622	0.064	3	High	0.026	0.0382491
	MelB_Na	MELB	192	204	STIVTLRNVHEVY	1529.82	4.5454	300	11	11	-0.218	-1.985	0.172	3	Medium	0.069	0.0379646
	MelB_Na	MELB	192	204	STIVTLRNVHEVY	1529.82	4.5299	3000	11	11	-0.039	-0.357	0.008	3	High	0.003	0.452481
	MelB_Na	MELB	194	197	IVTL	444.295	4.5424	0	2	0	0	0	n/a	1	Medium	0
	MelB_Na	MELB	194	197	IVTL	444.295	4.5527	30	2	1.999	0.058	2.924	0.024	3	Medium	0.01	0.0538653
	MelB_Na	MELB	194	197	IVTL	444.295	4.5581	300	2	2	0.042	2.103	0.06	3	Medium	0.024	0.0883048
	MelB_Na	MELB	194	197	IVTL	444.295	4.5228	3000	2	2	0.044	2.185	0.026	3	Medium	0.01	0.0139653
	MelB_Na	MELB	194	198	IVTLR	600.396	2.299	0	3	0	0	0	n/a	1	Medium	0
	MelB_Na	MELB	194	198	IVTLR	600.396	2.3259	30	3	2.999	0.007	0.224	0.018	3	Medium	0.007	0.686382
	MelB_Na	MELB	194	198	IVTLR	600.396	2.3211	300	3	3	0.005	0.179	0.011	3	Medium	0.004	0.0990694
	MelB_Na	MELB	194	198	IVTLR	600.396	2.3285	3000	3	3	-0.02	-0.674	0.041	3	Medium	0.017	0.0563941
	MelB_Na	MELB	194	199	IVTLRN	714.439	2.0768	0	4	0	0	0	n/a	1	Medium	0
	MelB_Na	MELB	194	199	IVTLRN	714.439	2.0991	30	4	3.999	-0.004	-0.095	0.013	3	Medium	0.005	0.00340328
	MelB_Na	MELB	194	199	IVTLRN	714.439	2.0927	300	4	4	-0.003	-0.071	0.014	3	Medium	0.006	0.0182842
	MelB_Na	MELB	194	199	IVTLRN	714.439	2.122	3000	4	4	-0.021	-0.533	0.006	3	Medium	0.003	0.100781
	MelB_Na	MELB	194	200	IVTLRNV	813.507	3.9756	0	5	0	0	0	n/a	1	Medium	0
	MelB_Na	MELB	194	200	IVTLRNV	813.507	3.9999	30	5	4.999	0.023	0.453	0.01	3	Medium	0.004	0.260087
	MelB_Na	MELB	194	200	IVTLRNV	813.507	3.9869	300	5	5	0.038	0.763	0.028	3	Medium	0.011	0.183716
	MelB_Na	MELB	194	200	IVTLRNV	813.507	3.9711	3000	5	5	0.103	2.062	0.092	3	Medium	0.037	0.416784
	MelB_Na	MELB	194	201	IVTLRNVH	950.566	2.1962	0	6	0	0	0	n/a	1	Medium	0
	MelB_Na	MELB	194	201	IVTLRNVH	950.566	2.2232	30	6	5.999	0.068	1.138	0.037	3	Medium	0.015	0.952583
	MelB_Na	MELB	194	201	IVTLRNVH	950.566	2.2425	300	6	6	0.065	1.084	0.02	3	Medium	0.008	0.000474989
	MelB_Na	MELB	194	201	IVTLRNVH	950.566	2.2915	3000	6	6	0.106	1.774	0.022	3	Medium	0.009	0.4019
	MelB_Na	MELB	194	203	IVTLRNVHEV	1178.68	3.4249	0	8	0	0	0	n/a	1	Medium	0
	MelB_Na	MELB	194	203	IVTLRNVHEV	1178.68	3.4611	30	8	7.921	0.028	0.345	0.141	3	Medium	0.057	0.0577898
	MelB_Na	MELB	194	203	IVTLRNVHEV	1178.68	3.4458	300	8	8	0.085	1.067	0.08	3	Medium	0.032	0.0024073
	MelB_Na	MELB	194	203	IVTLRNVHEV	1178.68	3.4513	3000	8	8	0.23	2.876	0.188	3	Medium	0.076	0.703487
	MelB_Na	MELB	194	204	IVTLRNVHEVY	1341.74	4.1416	0	9	0	0	0	n/a	1	Medium	0
	MelB_Na	MELB	194	204	IVTLRNVHEVY	1341.74	4.161	30	9	8.92	0.069	0.77	0.04	3	High	0.016	0.0151683
	MelB_Na	MELB	194	204	IVTLRNVHEVY	1341.74	4.1486	300	9	9	0.105	1.165	0.077	3	High	0.031	0.0361564
	MelB_Na	MELB	194	204	IVTLRNVHEVY	1341.74	4.1343	3000	9	9	0.303	3.366	0.009	3	High	0.003	0.851334
	MelB_Na	MELB	199	204	NVHEVY	759.355	2.2991	0	4	0	0	0	n/a	1	Medium	0
	MelB_Na	MELB	199	204	NVHEVY	759.355	2.353	30	4	3.921	0.063	1.583	0.033	3	Medium	0.013	0.00352859
	MelB_Na	MELB	199	204	NVHEVY	759.355	2.3496	300	4	4	0.132	3.298	0.166	3	Medium	0.067	0.0893014
	MelB_Na	MELB	199	204	NVHEVY	759.355	2.3692	3000	4	4	0.321	8.028	0.005	3	Medium	0.002	0.883103
	MelB_Na	MELB	208	217	NGVTAGRPHL	1020.55	2.1697	0	7	0	0	0	n/a	1	Medium	0
	MelB_Na	MELB	208	217	NGVTAGRPHL	1020.55	2.2592	30	7	6.995	0.022	0.308	0.136	3	Medium	0.055	0.0169209
	MelB_Na	MELB	208	217	NGVTAGRPHL	1020.55	2.2249	300	7	7	0.103	1.471	0.284	3	Medium	0.114	0.0743605
	MelB_Na	MELB	208	217	NGVTAGRPHL	1020.55	2.2634	3000	7	7	0.196	2.807	0.071	3	Medium	0.028	0.645445
	MelB_Na	MELB	212	225	AGRPHLTLKTIVGL	1474.9	5.7772	0	11	0	0	0	n/a	1	Medium	0
	MelB_Na	MELB	212	225	AGRPHLTLKTIVGL	1474.9	5.7805	30	11	10.87	0.437	3.971	0.574	3	Medium	0.231	0.282654
	MelB_Na	MELB	212	225	AGRPHLTLKTIVGL	1474.9	5.7744	300	11	11	0.574	5.215	0.599	3	Medium	0.241	0.0270626
	MelB_Na	MELB	212	225	AGRPHLTLKTIVGL	1474.9	5.7754	3000	11	11	0.88	7.996	0.508	3	Medium	0.204	0.706187
	MelB_Na	MELB	218	225	TLKTIVGL	843.543	5.6375	0	6	0	0	0	n/a	1	Medium	0
	MelB_Na	MELB	218	225	TLKTIVGL	843.543	5.641	30	6	5.87	0.118	1.974	0.105	3	Medium	0.042	0.00172193
	MelB_Na	MELB	218	225	TLKTIVGL	843.543	5.6126	300	6	6	0.221	3.691	0.344	3	Medium	0.138	0.0459375
	MelB_Na	MELB	218	225	TLKTIVGL	843.543	4.9284	3000	6	6	1.118	18.637	0.018	3	Medium	0.007	0.17865
	MelB_Na	MELB	219	225	LKTIVGL	742.495	5.0338	0	5	0	0	0	n/a	1	Medium	0
	MelB_Na	MELB	219	225	LKTIVGL	742.495	5.0471	30	5	4.87	0.157	3.141	0.125	3	Medium	0.05	0.0513897
	MelB_Na	MELB	219	225	LKTIVGL	742.495	5.0344	300	5	5	0.232	4.631	0.238	3	Medium	0.096	0.156423
	MelB_Na	MELB	219	225	LKTIVGL	742.495	5.0272	3000	5	5	0.779	15.589	0.306	3	Medium	0.123	0.158523
	MelB_Na	MELB	219	227	LKTIVGLIY	1018.64	7.4528	0	7	0	0	0	n/a	1	High	0
	MelB_Na	MELB	219	227	LKTIVGLIY	1018.64	7.428	30	7	6.738	0.114	1.633	0.069	3	Medium	0.028	0.00642369
	MelB_Na	MELB	219	227	LKTIVGLIY	1018.64	7.4381	300	7	7	0.188	2.692	0.166	3	Medium	0.067	0.0994258
	MelB_Na	MELB	219	227	LKTIVGLIY	1018.64	7.4104	3000	7	7	0.569	8.124	0.066	3	Medium	0.027	0.417886
	MelB_Na	MELB	220	225	KTIVGL	629.411	3.8592	0	4	0	0	0	n/a	1	Medium	0
	MelB_Na	MELB	220	225	KTIVGL	629.411	3.859	30	4	3.87	0.03	0.749	0.011	3	Medium	0.004	0.00612443
	MelB_Na	MELB	220	225	KTIVGL	629.411	3.8401	300	4	4	0.045	1.121	0.007	3	Medium	0.003	0.302019
	MelB_Na	MELB	220	225	KTIVGL	629.411	3.8725	3000	4	4	0.37	9.261	0.2	3	Medium	0.08	0.196574
	MelB_Na	MELB	220	227	KTIVGLIY	905.559	6.2119	0	6	0	0	0	n/a	1	Medium	0
	MelB_Na	MELB	220	227	KTIVGLIY	905.559	6.2974	30	6	5.738	0.053	0.885	0.021	3	Medium	0.009	0.128523
	MelB_Na	MELB	220	227	KTIVGLIY	905.559	6.2449	300	6	6	0.086	1.433	0.047	3	Medium	0.019	0.0952864
	MelB_Na	MELB	220	227	KTIVGLIY	905.559	6.2589	3000	6	6	0.389	6.482	0.184	3	Medium	0.074	0.0870348
	MelB_Na	MELB	221	225	TIVGL	501.316	5.0915	0	3	0	0	0	n/a	1	High	0
	MelB_Na	MELB	221	225	TIVGL	501.316	5.1223	30	3	2.875	0.037	1.229	0.014	3	High	0.006	0.170009
	MelB_Na	MELB	221	225	TIVGL	501.316	5.1094	300	3	3	0.052	1.734	0.017	3	High	0.007	0.361981
	MelB_Na	MELB	221	225	TIVGL	501.316	5.0847	3000	3	3	0.303	10.104	0.147	3	High	0.059	0.0924046
	MelB_Na	MELB	222	227	IVGLIY	676.416	6.9396	0	4	0	0	0	n/a	1	Medium	0
	MelB_Na	MELB	222	227	IVGLIY	676.416	7.027	30	4	3.867	0.024	0.612	0.022	3	Medium	0.009	0.902957
	MelB_Na	MELB	222	227	IVGLIY	676.416	6.9799	300	4	4	0.031	0.777	0.047	3	Medium	0.019	0.103556
	MelB_Na	MELB	222	227	IVGLIY	676.416	6.946	3000	4	4	0.21	5.238	0.056	3	Medium	0.023	0.517606
	MelB_Na	MELB	226	232	IYKNDQL	892.465	2.6746	0	5	0	0	0	n/a	1	High	0
	MelB_Na	MELB	226	232	IYKNDQL	892.465	2.6928	30	5	4.999	0.078	1.555	0.089	3	High	0.036	0.0540623
	MelB_Na	MELB	226	232	IYKNDQL	892.465	2.6977	300	5	5	0.153	3.052	0.255	3	High	0.103	0.165295
	MelB_Na	MELB	226	232	IYKNDQL	892.465	2.7023	3000	5	5	0.59	11.799	0.263	3	Medium	0.106	0.578125
	MelB_Na	MELB	226	235	IYKNDQLSCL	1195.59	5.2967	0	8	0	0	0	n/a	1	High	0
	MelB_Na	MELB	226	235	IYKNDQLSCL	1195.59	5.325	30	8	7.999	-0.037	-0.457	0.113	3	High	0.045	0.0927592
	MelB_Na	MELB	226	235	IYKNDQLSCL	1195.59	5.2964	300	8	8	0.006	0.073	0.192	3	Medium	0.077	0.0662414
	MelB_Na	MELB	226	235	IYKNDQLSCL	1195.59	5.2964	3000	8	8	0.406	5.071	0.159	3	Medium	0.064	0.679464
	MelB_Na	MELB	230	235	DQLSCL	677.305	5.5635	0	4	0	0	0	n/a	1	Medium	0
	MelB_Na	MELB	230	235	DQLSCL	677.305	5.5468	30	4	3.999	0.035	0.884	0.032	3	Medium	0.013	0.129909
	MelB_Na	MELB	230	235	DQLSCL	677.305	5.5431	300	4	4	0.042	1.04	0.026	3	Medium	0.011	0.0949561
	MelB_Na	MELB	230	235	DQLSCL	677.305	5.5288	3000	4	4	0.111	2.766	0.033	3	Medium	0.013	0.986685
	MelB_Na	MELB	231	235	QLSCL	562.279	5.0602	0	3	0	0	0	n/a	1	Medium	0
	MelB_Na	MELB	231	235	QLSCL	562.279	5.0751	30	3	3	-0.015	-0.49	0.073	3	Medium	0.029	0.98511
	MelB_Na	MELB	231	235	QLSCL	562.279	5.0518	300	3	3	0.017	0.569	0.089	3	Medium	0.036	0.793501
	MelB_Na	MELB	231	235	QLSCL	562.279	5.0434	3000	3	3	0.086	2.859	0.035	3	Medium	0.014	0.919039
	MelB_Na	MELB	236	239	LGMA	390.194	2.643	0	2	0	0	0	n/a	1	Medium	0
	MelB_Na	MELB	236	239	LGMA	390.194	2.6223	30	2	2	0.038	1.907	0.025	3	Medium	0.01	0.113894
	MelB_Na	MELB	236	239	LGMA	390.194	2.6171	300	2	2	0.039	1.929	0.063	3	Medium	0.025	0.260783
	MelB_Na	MELB	236	239	LGMA	390.194	2.6297	3000	2	2	0.099	4.958	0.016	3	Medium	0.007	0.0207353
	MelB_Na	MELB	240	250	LAYNIASNIIN	1204.65	6.3187	0	9	0	0	0	n/a	1	Medium	0
	MelB_Na	MELB	240	250	LAYNIASNIIN	1204.65	6.3332	30	9	8.857	0.035	0.389	0.039	3	Medium	0.016	0.43703
	MelB_Na	MELB	240	250	LAYNIASNIIN	1204.65	6.3345	300	9	9	0.074	0.821	0.094	3	Medium	0.038	0.207117
	MelB_Na	MELB	240	250	LAYNIASNIIN	1204.65	6.3261	3000	9	9	0.139	1.544	0.176	3	Medium	0.071	0.976112
	MelB_Na	MELB	240	251	LAYNIASNIING	1261.67	6.8147	0	10	0	0	0	n/a	1	Medium	0
	MelB_Na	MELB	240	251	LAYNIASNIING	1261.67	6.8167	30	10	9.857	-0.028	-0.276	0.098	3	Medium	0.04	0.448643
	MelB_Na	MELB	240	251	LAYNIASNIING	1261.67	6.822	300	10	10	-0.03	-0.302	0.101	3	Medium	0.041	0.0834888
	MelB_Na	MELB	240	251	LAYNIASNIING	1261.67	6.8229	3000	10	10	-0.065	-0.654	0.045	3	Medium	0.018	0.0919554
	MelB_Na	MELB	242	255	YNIASNIINGFAIY	1571.8	10.0304	0	12	0	0	0	n/a	1	High	0
	MelB_Na	MELB	242	255	YNIASNIINGFAIY	1571.8	10.0553	30	12	11.818	0.076	0.635	0.01	3	Medium	0.004	0.00534323
	MelB_Na	MELB	242	255	YNIASNIINGFAIY	1571.8	10.046	300	12	12	0.133	1.106	0.103	3	Medium	0.041	0.169797
	MelB_Na	MELB	242	255	YNIASNIINGFAIY	1571.8	10.033	3000	12	12	0.193	1.607	0.014	3	Medium	0.006	0.0781333
	MelB_Na	MELB	244	253	IASNIINGFA	1018.54	6.5208	0	8	0	0	0	n/a	1	High	0
	MelB_Na	MELB	244	253	IASNIINGFA	1018.54	6.5253	30	8	7.858	-0.061	-0.761	0.029	3	High	0.012	0.806525
	MelB_Na	MELB	244	253	IASNIINGFA	1018.54	6.5165	300	8	8	-0.06	-0.746	0.003	3	High	0.001	0.05174
	MelB_Na	MELB	244	253	IASNIINGFA	1018.54	6.5246	3000	8	8	-0.03	-0.381	0.129	3	Medium	0.052	0.263914
	MelB_Na	MELB	244	255	IASNIINGFAIY	1294.69	8.4658	0	10	0	0	0	n/a	1	High	0
	MelB_Na	MELB	244	255	IASNIINGFAIY	1294.69	8.4937	30	10	9.819	0.058	0.576	0.012	3	High	0.005	0.0139198
	MelB_Na	MELB	244	255	IASNIINGFAIY	1294.69	8.4787	300	10	10	0.085	0.846	0.021	3	High	0.009	0.138701
	MelB_Na	MELB	244	255	IASNIINGFAIY	1294.69	8.4833	3000	10	10	0.127	1.27	0.018	3	High	0.007	0.140751
	MelB_Na	MELB	246	255	SNIINGFAIY	1110.57	8.0633	0	8	0	0	0	n/a	1	High	0
	MelB_Na	MELB	246	255	SNIINGFAIY	1110.57	8.169	30	8	7.819	0.049	0.611	0.011	3	Medium	0.004	0.00106481
	MelB_Na	MELB	246	255	SNIINGFAIY	1110.57	8.16	300	8	8	0.062	0.773	0.036	3	Medium	0.014	0.142293
	MelB_Na	MELB	246	255	SNIINGFAIY	1110.57	8.1397	3000	8	8	0.099	1.24	0.034	3	Medium	0.013	0.0487228
	MelB_Na	MELB	252	255	FAIY	512.264	6.0176	0	2	0	0	0	n/a	1	High	0
	MelB_Na	MELB	252	255	FAIY	512.264	6.0948	30	2	1.961	0.02	0.991	0.012	3	High	0.005	0.109388
	MelB_Na	MELB	252	255	FAIY	512.264	6.0759	300	2	2	0.031	1.569	0.016	3	High	0.007	0.522775
	MelB_Na	MELB	252	255	FAIY	512.264	6.0686	3000	2	2	0.044	2.179	0.024	3	Medium	0.01	0.824148
	MelB_Na	MELB	254	257	IYYF	604.29	7.604	0	2	0	0	0	n/a	1	Medium	0
	MelB_Na	MELB	254	257	IYYF	604.29	7.6295	30	2	2	-0.006	-0.318	0.014	3	Medium	0.006	0.446237
	MelB_Na	MELB	254	257	IYYF	604.29	7.6246	300	2	2	-0.008	-0.403	0.014	3	Medium	0.006	0.0437535
	MelB_Na	MELB	254	257	IYYF	604.29	7.6164	3000	2	2	-0.012	-0.619	0.008	3	Medium	0.003	0.0114483
	MelB_Na	MELB	256	259	YFTY	592.253	5.5469	0	2	0	0	0	n/a	1	High	0
	MelB_Na	MELB	256	259	YFTY	592.253	5.5666	30	2	2	0.019	0.97	0.004	3	High	0.002	0.00176409
	MelB_Na	MELB	256	259	YFTY	592.253	5.6052	300	2	2	0.028	1.384	0.022	3	High	0.009	0.262517
	MelB_Na	MELB	256	259	YFTY	592.253	5.6039	3000	2	2	0.038	1.901	0.019	3	High	0.007	0.152781
	MelB_Na	MELB	258	262	TYVIG	551.295	3.706	0	3	0	0	0	n/a	1	Medium	0
	MelB_Na	MELB	258	262	TYVIG	551.295	3.7501	30	3	2.891	0.01	0.325	0.045	3	Medium	0.018	0.0226652
	MelB_Na	MELB	258	262	TYVIG	551.295	3.7201	300	3	3	0.041	1.37	0.035	3	Medium	0.014	0.0534569
	MelB_Na	MELB	258	262	TYVIG	551.295	3.7304	3000	3	3	0.135	4.51	0.142	3	Medium	0.057	0.0830676
	MelB_Na	MELB	263	267	DADLF	579.254	6.2177	0	3	0	0	0	n/a	1	Medium	0
	MelB_Na	MELB	263	267	DADLF	579.254	6.2749	30	3	2.956	0.053	1.762	0.017	3	Medium	0.007	0.0138216
	MelB_Na	MELB	263	267	DADLF	579.254	6.2531	300	3	3	0.074	2.458	0.02	3	Medium	0.008	0.126767
	MelB_Na	MELB	263	267	DADLF	579.254	6.2569	3000	3	3	0.164	5.451	0.11	3	Medium	0.044	0.0898003
	MelB_Na	MELB	263	270	DADLFPYY	1002.43	8.4277	0	5	0	0	0	n/a	1	High	0
	MelB_Na	MELB	263	270	DADLFPYY	1002.43	8.4845	30	5	4.952	0.049	0.976	0.022	3	High	0.009	0.0104848
	MelB_Na	MELB	263	270	DADLFPYY	1002.43	8.4748	300	5	5	0.085	1.693	0.038	3	High	0.015	0.115327
	MelB_Na	MELB	263	270	DADLFPYY	1002.43	8.4633	3000	5	5	0.201	4.011	0.091	3	Medium	0.036	0.0897592
	MelB_Na	MELB	265	270	DLFPYY	816.369	8.6549	0	3	0	0	0	n/a	1	Medium	0
	MelB_Na	MELB	265	270	DLFPYY	816.369	8.5958	30	3	2.994	-0.106	-3.525	0.057	2	Medium	0.006	0.0188419
	MelB_Na	MELB	265	270	DLFPYY	816.369	8.5337	300	3	3	-0.08	-2.673	0.068	3	Medium	0.027	0.104913
	MelB_Na	MELB	265	270	DLFPYY	816.369	8.6343	3000	3	3	0.025	0.838	0.114	3	Medium	0.046	0.0170798
	MelB_Na	MELB	266	270	LFPYY	701.342	7.2937	0	2	0	0	0	n/a	1	High	0
	MelB_Na	MELB	266	270	LFPYY	701.342	7.3022	30	2	1.996	0.012	0.585	0.028	3	High	0.011	0.489265
	MelB_Na	MELB	266	270	LFPYY	701.342	7.2945	300	2	2	0.025	1.251	0.017	3	High	0.007	0.132792
	MelB_Na	MELB	266	270	LFPYY	701.342	7.2744	3000	2	2	0.048	2.419	0.035	3	High	0.014	0.211396
	MelB_Na	MELB	273	282	YAGAANLLTL	1005.55	7.8533	0	8	0	0	0	n/a	1	High	0
	MelB_Na	MELB	273	282	YAGAANLLTL	1005.55	7.8851	30	8	7.946	0.083	1.041	0.079	3	Medium	0.032	0.0312512
	MelB_Na	MELB	273	282	YAGAANLLTL	1005.55	7.8674	300	8	8	0.147	1.831	0.125	3	Medium	0.05	0.0375267
	MelB_Na	MELB	273	282	YAGAANLLTL	1005.55	7.8527	3000	8	8	0.37	4.627	0.051	3	High	0.02	0.301664
	MelB_Na	MELB	274	282	AGAANLLTL	842.486	7.2455	0	7	0	0	0	n/a	1	High	0
	MelB_Na	MELB	274	282	AGAANLLTL	842.486	7.2526	30	7	6.946	0.027	0.384	0.032	3	High	0.013	0.0674178
	MelB_Na	MELB	274	282	AGAANLLTL	842.486	7.2338	300	7	7	0.05	0.714	0.044	3	High	0.018	0.261953
	MelB_Na	MELB	274	282	AGAANLLTL	842.486	7.269	3000	7	7	0.144	2.052	0.042	3	High	0.017	0.272437
	MelB_Na	MELB	281	288	TLIVFPRL	957.601	8.0949	0	5	0	0	0	n/a	1	High	0
	MelB_Na	MELB	281	288	TLIVFPRL	957.601	8.0879	30	5	4.747	0.175	3.507	0.034	3	High	0.014	0.132733
	MelB_Na	MELB	281	288	TLIVFPRL	957.601	8.0846	300	5	5	0.211	4.226	0.062	3	High	0.025	0.425441
	MelB_Na	MELB	281	288	TLIVFPRL	957.601	8.0779	3000	5	5	0.372	7.448	0.031	3	High	0.012	0.300708
	MelB_Na	MELB	283	288	IVFPRL	743.469	6.8928	0	3	0	0	0	n/a	1	High	0
	MelB_Na	MELB	283	288	IVFPRL	743.469	6.9115	30	3	2.999	0.084	2.805	0.011	3	Medium	0.004	0.0198554
	MelB_Na	MELB	283	288	IVFPRL	743.469	6.8751	300	3	3	0.123	4.096	0.063	3	Medium	0.025	0.0548791
	MelB_Na	MELB	283	288	IVFPRL	743.469	6.8705	3000	3	3	0.353	11.754	0.064	3	Medium	0.026	0.363071
	MelB_Na	MELB	283	290	IVFPRLVK	970.633	4.3044	0	5	0	0	0	n/a	1	Medium	0
	MelB_Na	MELB	283	290	IVFPRLVK	970.633	5.2058	30	5	4.887	0.248	4.966	0.042	3	Medium	0.017	0.391058
	MelB_Na	MELB	283	290	IVFPRLVK	970.633	5.1961	300	5	5	0.305	6.11	0.094	3	Medium	0.038	0.977579
	MelB_Na	MELB	283	290	IVFPRLVK	970.633	5.1744	3000	5	5	0.811	16.222	0.081	3	Medium	0.033	0.0830164
	MelB_Na	MELB	289	292	VKML	489.298	3.0198	0	2	0	0	0	n/a	1	Medium	0
	MelB_Na	MELB	289	292	VKML	489.298	3.0203	30	2	1.998	0.074	3.719	0.022	3	Medium	0.009	0.072597
	MelB_Na	MELB	289	292	VKML	489.298	3.0007	300	2	2	0.115	5.77	0.027	3	Medium	0.011	0.139602
	MelB_Na	MELB	289	292	VKML	489.298	3.0139	3000	2	2	0.522	26.094	0.102	3	Medium	0.041	0.203974
	MelB_Na	MELB	291	297	MLSRRIL	887.538	3.1844	0	5	0	0	0	n/a	1	Medium	0
	MelB_Na	MELB	291	297	MLSRRIL	887.538	3.207	30	5	4.935	0.233	4.668	0.396	3	Medium	0.159	0.0648923
	MelB_Na	MELB	291	297	MLSRRIL	887.538	3.1961	300	5	5	0.384	7.686	0.661	3	Medium	0.266	0.102282
	MelB_Na	MELB	291	297	MLSRRIL	887.538	3.2104	3000	5	5	1.022	20.446	0.312	3	Medium	0.125	0.880807
	MelB_Na	MELB	292	297	LSRRIL	756.497	2.4047	0	4	0	0	0	n/a	1	High	0
	MelB_Na	MELB	292	297	LSRRIL	756.497	2.4218	30	4	3.935	0.185	4.634	0.324	3	Medium	0.131	0.053321
	MelB_Na	MELB	292	297	LSRRIL	756.497	2.4128	300	4	4	0.321	8.025	0.659	3	Medium	0.265	0.1453
	MelB_Na	MELB	292	297	LSRRIL	756.497	2.4701	3000	4	4	0.747	18.665	0.246	3	Medium	0.099	0.865954
	MelB_Na	MELB	295	301	RILWAGA	785.455	5.4832	0	5	0	0	0	n/a	1	Medium	0
	MelB_Na	MELB	295	301	RILWAGA	785.455	5.5207	30	5	4.925	0.04	0.793	0.084	3	Medium	0.034	0.0646609
	MelB_Na	MELB	295	301	RILWAGA	785.455	5.4834	300	5	5	0.095	1.9	0.141	3	Medium	0.057	0.272791
	MelB_Na	MELB	295	301	RILWAGA	785.455	5.4989	3000	5	5	0.093	1.867	0.022	3	Medium	0.009	0.0575904
	MelB_Na	MELB	308	312	SCAGL	449.194	3.0092	0	3	0	0	0	n/a	1	High	0
	MelB_Na	MELB	308	312	SCAGL	449.194	3.0167	30	3	2.999	0.005	0.157	0.012	3	Medium	0.005	0.0419027
	MelB_Na	MELB	308	312	SCAGL	449.194	3.0096	300	3	3	0.005	0.181	0.006	3	Medium	0.003	0.0531536
	MelB_Na	MELB	308	312	SCAGL	449.194	3.0175	3000	3	3	0.004	0.12	0	3	High	0	0.0470294
	MelB_Na	MELB	308	313	SCAGLF	596.263	6.6209	0	4	0	0	0	n/a	1	High	0
	MelB_Na	MELB	308	313	SCAGLF	596.263	6.6158	30	4	3.997	-0.017	-0.421	0.027	3	Medium	0.011	0.179501
	MelB_Na	MELB	308	313	SCAGLF	596.263	6.6192	300	4	4	0.022	0.559	0.062	3	Medium	0.025	0.736598
	MelB_Na	MELB	308	313	SCAGLF	596.263	6.6187	3000	4	4	0.017	0.431	0.076	3	Medium	0.031	0.061983
	MelB_Na	MELB	316	325	ALADIHNAAL	1007.54	4.2496	0	8	0	0	0	n/a	1	Medium	0
	MelB_Na	MELB	316	325	ALADIHNAAL	1007.54	4.269	30	8	7.883	0.201	2.516	0.077	3	Medium	0.031	0.0700284
	MelB_Na	MELB	316	325	ALADIHNAAL	1007.54	4.2662	300	8	8	0.256	3.197	0.148	3	Medium	0.059	0.0575103
	MelB_Na	MELB	316	325	ALADIHNAAL	1007.54	4.2509	3000	8	8	0.52	6.503	0.103	3	Medium	0.041	0.449147
	MelB_Na	MELB	317	323	LADIHNA	752.382	1.9659	0	5	0	0	0	n/a	1	High	0
	MelB_Na	MELB	317	323	LADIHNA	752.382	2.0383	30	5	4.892	0.103	2.063	0.077	3	Medium	0.031	0.00516784
	MelB_Na	MELB	317	323	LADIHNA	752.382	2.0094	300	5	5	0.166	3.324	0.212	3	Medium	0.085	0.0261351
	MelB_Na	MELB	317	323	LADIHNA	752.382	2.0476	3000	5	5	0.381	7.611	0.017	3	Medium	0.007	0.771268
	MelB_Na	MELB	317	325	LADIHNAAL	936.503	3.6802	0	7	0	0	0	n/a	1	High	0
	MelB_Na	MELB	317	325	LADIHNAAL	936.503	3.6959	30	7	6.883	0.216	3.086	0.062	3	High	0.025	0.0491604
	MelB_Na	MELB	317	325	LADIHNAAL	936.503	3.6929	300	7	7	0.28	4	0.184	3	High	0.074	0.0385697
	MelB_Na	MELB	317	325	LADIHNAAL	936.503	3.6985	3000	7	7	0.548	7.825	0.058	3	Medium	0.023	0.628078
	MelB_Na	MELB	348	358	VADTVDYGEFK	1242.58	4.3751	0	9	0	0	0	n/a	1	High	0
	MelB_Na	MELB	348	358	VADTVDYGEFK	1242.58	4.4107	30	9	8.994	0.055	0.614	0.012	3	High	0.005	7.38735e-05
	MelB_Na	MELB	348	358	VADTVDYGEFK	1242.58	4.3723	300	9	9	0.076	0.842	0.032	3	High	0.013	0.0622198
	MelB_Na	MELB	348	358	VADTVDYGEFK	1242.58	4.3654	3000	9	9	0.25	2.779	0.022	3	High	0.009	0.584498
	MelB_Na	MELB	348	359	VADTVDYGEFKL	1355.66	6.9814	0	10	0	0	0	n/a	1	Medium	0
	MelB_Na	MELB	348	359	VADTVDYGEFKL	1355.66	7.027	30	10	9.992	0.034	0.345	0.09	3	Medium	0.036	0.13651
	MelB_Na	MELB	348	359	VADTVDYGEFKL	1355.66	7.0346	300	10	10	0.044	0.438	0.083	3	Medium	0.033	0.0728371
	MelB_Na	MELB	348	359	VADTVDYGEFKL	1355.66	7.0036	3000	10	10	0.194	1.942	0.085	3	Medium	0.034	0.651647
	MelB_Na	MELB	350	358	DTVDYGEFK	1072.47	4.1127	0	7	0	0	0	n/a	1	High	0
	MelB_Na	MELB	350	358	DTVDYGEFK	1072.47	4.1631	30	7	6.994	0.046	0.655	0.032	3	High	0.013	0.0276005
	MelB_Na	MELB	350	358	DTVDYGEFK	1072.47	4.147	300	7	7	0.06	0.85	0.026	3	High	0.011	0.0610611
	MelB_Na	MELB	350	358	DTVDYGEFK	1072.47	4.1289	3000	7	7	0.178	2.541	0.065	3	Medium	0.026	0.759211
	MelB_Na	MELB	354	358	YGEFK	642.301	2.5265	0	3	0	0	0	n/a	1	Medium	0
	MelB_Na	MELB	354	358	YGEFK	642.301	2.5085	30	3	2.999	0.089	2.963	0.152	3	Medium	0.061	0.669339
	MelB_Na	MELB	354	358	YGEFK	642.301	2.5635	300	3	3	0.043	1.445	0.025	3	Medium	0.01	0.0111196
	MelB_Na	MELB	354	358	YGEFK	642.301	2.5817	3000	3	3	0.221	7.375	0.342	3	Medium	0.138	0.294988
	MelB_Na	MELB	354	359	YGEFKL	755.385	6.0174	0	4	0	0	0	n/a	1	Medium	0
	MelB_Na	MELB	354	359	YGEFKL	755.385	5.9968	30	4	3.997	0.054	1.351	0.166	3	Medium	0.067	0.872066
	MelB_Na	MELB	354	359	YGEFKL	755.385	6.0128	300	4	4	0.024	0.605	0.241	2	Medium	0.027	0.16542
	MelB_Na	MELB	354	359	YGEFKL	755.385	6.0096	3000	4	4	0.142	3.549		1	Medium	0
	MelB_Na	MELB	363	367	CESIA	521.216	2.1353	0	3	0	0	0	n/a	1	High	0
	MelB_Na	MELB	363	367	CESIA	521.216	2.1493	30	3	2.999	0.128	4.282	0.297	3	Medium	0.12	0.0929335
	MelB_Na	MELB	363	367	CESIA	521.216	2.1444	300	3	3	0.254	8.467	0.596	3	Medium	0.24	0.14327
	MelB_Na	MELB	363	367	CESIA	521.216	2.1716	3000	3	3	0.801	26.699	0.262	3	Medium	0.106	0.424236
	MelB_Na	MELB	368	373	YSVQTM	727.321	3.6693	0	4	0	0	0	n/a	1	High	0
	MelB_Na	MELB	368	373	YSVQTM	727.321	3.6959	30	4	3.999	0.017	0.419	0.004	3	High	0.002	0.0157502
	MelB_Na	MELB	368	373	YSVQTM	727.321	3.693	300	4	4	0.033	0.836	0.042	3	High	0.017	0.029762
	MelB_Na	MELB	368	373	YSVQTM	727.321	3.6914	3000	4	4	0.157	3.914	0.032	3	High	0.013	0.029552
	MelB_Na	MELB	372	383	TMVVKGGSAFAA	1137.59	3.6218	0	10	0	0	0	n/a	1	Medium	0
	MelB_Na	MELB	372	383	TMVVKGGSAFAA	1137.59	3.6306	30	10	9.913	0.032	0.32	0.065	3	Medium	0.026	0.643398
	MelB_Na	MELB	372	383	TMVVKGGSAFAA	1137.59	3.6319	300	10	10	0.054	0.537	0.025	3	Medium	0.01	0.0738747
	MelB_Na	MELB	372	383	TMVVKGGSAFAA	1137.59	3.64	3000	10	10	0.071	0.708	0.026	3	Medium	0.01	0.346001
	MelB_Na	MELB	374	381	VVKGGSAF	763.423	2.5264	0	6	0	0	0	n/a	1	Medium	0
	MelB_Na	MELB	374	381	VVKGGSAF	763.423	2.5523	30	6	6	3.209	53.491	0.07	3	Medium	0.028	0.389494
	MelB_Na	MELB	374	381	VVKGGSAF	763.423	2.5347	300	6	6	3.252	54.205	0.005	3	Medium	0.002	0.41675
	MelB_Na	MELB	374	381	VVKGGSAF	763.423	2.5427	3000	6	6	3.222	53.692	0.022	3	Medium	0.009	0.565624
	MelB_Na	MELB	374	383	VVKGGSAFAA	905.497	2.5213	0	8	0	0	0	n/a	1	High	0
	MelB_Na	MELB	374	383	VVKGGSAFAA	905.497	2.5504	30	8	8	0.037	0.458	0.005	3	High	0.002	0.000597441
	MelB_Na	MELB	374	383	VVKGGSAFAA	905.497	2.5382	300	8	8	0.041	0.508	0.015	3	High	0.006	0.0451333
	MelB_Na	MELB	374	383	VVKGGSAFAA	905.497	2.5692	3000	8	8	0.083	1.04	0.016	3	Medium	0.007	0.437906
	MelB_Na	MELB	377	383	GGSAFAA	579.265	2.956	0	5	0	0	0	n/a	1	Medium	0
	MelB_Na	MELB	377	383	GGSAFAA	579.265	2.9895	30	5	5	0.02	0.403	0.013	3	Medium	0.005	0.28254
	MelB_Na	MELB	377	383	GGSAFAA	579.265	2.9718	300	5	5	0.028	0.555	0.006	3	Medium	0.003	0.173909
	MelB_Na	MELB	377	383	GGSAFAA	579.265	2.9872	3000	5	5	0.005	0.1	0.023	3	Medium	0.009	0.0157815
	MelB_Na	MELB	381	385	FAAFF	601.29	8.9284	0	3	0	0	0	n/a	1	Medium	0
	MelB_Na	MELB	381	385	FAAFF	601.29	8.912	30	3	3	0.024	0.812	0.035	3	Medium	0.014	0.50436
	MelB_Na	MELB	381	385	FAAFF	601.29	8.9196	300	3	3	0.032	1.076	0.026	3	Medium	0.01	0.024489
	MelB_Na	MELB	381	385	FAAFF	601.29	8.8907	3000	3	3	0.042	1.385	0.002	3	Medium	0.001	0.152192
	MelB_Na	MELB	393	404	IGYTPNVAQSAQ	1247.61	3.1155	0	9	0	0	0	n/a	1	High	0
	MelB_Na	MELB	393	404	IGYTPNVAQSAQ	1247.61	3.154	30	9	8.999	0.081	0.895	0.031	3	High	0.013	0.000511791
	MelB_Na	MELB	393	404	IGYTPNVAQSAQ	1247.61	3.1455	300	9	9	0.113	1.258	0.059	3	High	0.024	0.0501835
	MelB_Na	MELB	393	404	IGYTPNVAQSAQ	1247.61	3.1477	3000	9	9	0.215	2.386	0.179	3	High	0.072	0.381064
	MelB_Na	MELB	393	405	IGYTPNVAQSAQT	1348.66	3.1951	0	10	0	0	0	n/a	1	High	0
	MelB_Na	MELB	393	405	IGYTPNVAQSAQT	1348.66	3.2125	30	10	9.999	0.082	0.822	0.053	3	High	0.021	0.000387476
	MelB_Na	MELB	393	405	IGYTPNVAQSAQT	1348.66	3.2016	300	10	10	0.112	1.119	0.097	3	High	0.039	0.0549093
	MelB_Na	MELB	393	405	IGYTPNVAQSAQT	1348.66	3.2104	3000	10	10	0.211	2.107	0.199	3	High	0.08	0.318151
	MelB_Na	MELB	395	406	YTPNVAQSAQTL	1291.64	4.3021	0	9	0	0	0	n/a	1	Medium	0
	MelB_Na	MELB	395	406	YTPNVAQSAQTL	1291.64	4.318	30	9	8.999	-0.133	-1.478	0.05	3	Medium	0.02	0.0190562
	MelB_Na	MELB	395	406	YTPNVAQSAQTL	1291.64	4.3024	300	9	9	-0.141	-1.566	0.059	2	Medium	0.007	0.225064
	MelB_Na	MELB	395	406	YTPNVAQSAQTL	1291.64	4.2912	3000	9	9	-0.033	-0.365	0.093	3	Medium	0.037	0.983208
	MelB_Na	MELB	405	413	TLQGMQFIM	1067.51	8.5247	0	7	0	0	0	n/a	1	Medium	0
	MelB_Na	MELB	405	413	TLQGMQFIM	1067.51	8.488	30	7	6.979	-0.014	-0.204	0.047	3	Medium	0.019	0.151166
	MelB_Na	MELB	405	413	TLQGMQFIM	1067.51	8.484	300	7	7	0.01	0.14	0.039	3	Medium	0.016	0.275193
	MelB_Na	MELB	405	413	TLQGMQFIM	1067.51	8.4725	3000	7	7	0.015	0.213	0.001	3	Medium	0	0.416414
	MelB_Na	MELB	407	411	QGMQF	609.258	5.2545	0	3	0	0	0	n/a	1	Medium	0
	MelB_Na	MELB	407	411	QGMQF	609.258	5.2011	30	3	3	0.055	1.826	0.011	3	Medium	0.005	0.0123354
	MelB_Na	MELB	407	411	QGMQF	609.258	5.2559	300	3	3	0.067	2.228	0.018	3	Medium	0.007	0.0898362
	MelB_Na	MELB	407	411	QGMQF	609.258	5.2353	3000	3	3	0.078	2.589	0.064	3	Medium	0.026	0.275239
	MelB_Na	MELB	414	419	IVLPVL	652.452	7.8567	0	3	0	0	0	n/a	1	Medium	0
	MelB_Na	MELB	414	419	IVLPVL	652.452	7.7556	30	3	2.806	0.008	0.265	0.002	3	High	0.001	0.398278
	MelB_Na	MELB	414	419	IVLPVL	652.452	7.7759	300	3	3	0.008	0.263	0	3	High	0	0.072106
	MelB_Na	MELB	414	419	IVLPVL	652.452	7.8461	3000	3	3	0.009	0.312	0.001	3	High	0	0.243427
	MelB_Na	MELB	420	422	FFM	443.188	7.0389	0	1	0	0	0	n/a	1	Medium	0
	MelB_Na	MELB	420	422	FFM	443.188	7.0188	30	1	1	0.01	0.987	0.034	3	Medium	0.014	0.359224
	MelB_Na	MELB	420	422	FFM	443.188	7.0178	300	1	1	0.021	2.077	0.052	3	Medium	0.021	0.972566
	MelB_Na	MELB	420	422	FFM	443.188	7.0057	3000	1	1	0.017	1.698	0.018	3	Medium	0.007	0.0340015
	MelB_Na	MELB	421	424	FMMT	528.208	4.4377	0	2	0	0	0	n/a	1	High	0
	MelB_Na	MELB	421	424	FMMT	528.208	4.4581	30	2	2	0.072	3.592	0.015	3	High	0.006	0.638158
	MelB_Na	MELB	421	424	FMMT	528.208	4.4461	300	2	2	0.072	3.613	0.009	3	High	0.003	0.238849
	MelB_Na	MELB	421	424	FMMT	528.208	4.4201	3000	2	2	0.071	3.536	0.015	3	Medium	0.006	0.112532
	MelB_Na	MELB	422	425	MMTL	494.223	5.6855	0	2	0	0	0	n/a	1	Medium	0
	MelB_Na	MELB	422	425	MMTL	494.223	5.6668	30	2	1.999	0.044	2.193	0.002	3	Medium	0.001	0.306572
	MelB_Na	MELB	422	425	MMTL	494.223	5.6342	300	2	2	0.028	1.387	0.064	3	Medium	0.026	0.759321
	MelB_Na	MELB	422	425	MMTL	494.223	5.6432	3000	2	2	0.089	4.473	0.043	3	Medium	0.017	0.8121
	MelB_Na	MELB	426	430	VLYFR	696.396	4.7138	0	3	0	0	0	n/a	1	Medium	0
	MelB_Na	MELB	426	430	VLYFR	696.396	4.7337	30	3	2.997	-0.003	-0.095	0.022	3	High	0.009	0.41914
	MelB_Na	MELB	426	430	VLYFR	696.396	4.7285	300	3	3	-0.003	-0.115	0.014	3	High	0.006	0.448325
	MelB_Na	MELB	426	430	VLYFR	696.396	4.708	3000	3	3	0.008	0.25	0.023	3	High	0.009	0.20761
	MelB_Na	MELB	426	431	VLYFRY	859.459	6.3557	0	4	0	0	0	n/a	1	Medium	0
	MelB_Na	MELB	426	431	VLYFRY	859.459	6.3983	30	4	3.997	0.05	1.254	0.004	3	Medium	0.002	0.0391295
	MelB_Na	MELB	426	431	VLYFRY	859.459	6.3769	300	4	4	0.053	1.313	0.011	3	Medium	0.004	0.0934402
	MelB_Na	MELB	426	431	VLYFRY	859.459	6.3973	3000	4	4	0.051	1.28	0.01	3	Medium	0.004	0.605038
	MelB_Na	MELB	428	431	YFRY	647.307	4.1338	0	2	0	0	0	n/a	1	Medium	0
	MelB_Na	MELB	428	431	YFRY	647.307	4.1685	30	2	2	0.029	1.438	0.008	3	Medium	0.003	0.136604
	MelB_Na	MELB	428	431	YFRY	647.307	4.1559	300	2	2	0.032	1.62	0.03	3	Medium	0.012	0.982633
	MelB_Na	MELB	428	431	YFRY	647.307	4.1289	3000	2	2	0.014	0.689	0.01	3	Medium	0.004	0.808822
	MelB_Na	MELB	429	434	FRYYRL	916.492	4.775	0	4	0	0	0	n/a	1	Medium	0
	MelB_Na	MELB	429	434	FRYYRL	916.492	4.7965	30	4	4	-0.175	-4.374	0.029	3	Medium	0.012	0.271566
	MelB_Na	MELB	429	434	FRYYRL	916.492	4.7869	300	4	4	-0.153	-3.832	0.057	3	Medium	0.023	0.0757097
	MelB_Na	MELB	429	434	FRYYRL	916.492	4.7707	3000	4	4	-0.107	-2.67	0.039	3	Medium	0.016	0.670413
	MelB_Na	MELB	431	434	YYRL	613.322	4.1021	0	2	0	0	0	n/a	1	High	0
	MelB_Na	MELB	431	434	YYRL	613.322	4.1467	30	2	2	0.055	2.77	0.011	3	High	0.005	0.489898
	MelB_Na	MELB	431	434	YYRL	613.322	4.1158	300	2	2	0.059	2.944	0.024	3	High	0.01	0.102844
	MelB_Na	MELB	431	434	YYRL	613.322	4.1325	3000	2	2	0.067	3.362	0.037	3	Medium	0.015	0.894495
	MelB_Na	MELB	440	447	RKIQIHLL	1019.66	4.2179	0	6	0	0	0	n/a	1	High	0
	MelB_Na	MELB	440	447	RKIQIHLL	1019.66	4.2598	30	6	5.929	0.283	4.712	0.322	3	Medium	0.13	0.552175
	MelB_Na	MELB	440	447	RKIQIHLL	1019.66	4.2483	300	6	6	0.71	11.839	0.867	3	Medium	0.349	0.63723
	MelB_Na	MELB	440	447	RKIQIHLL	1019.66	4.2211	3000	6	6	2.716	45.263	0.556	3	Medium	0.224	0.0427853
	MelB_Na	MELB	442	447	IQIHLL	735.464	6.4598	0	4	0	0	0	n/a	1	Medium	0
	MelB_Na	MELB	442	447	IQIHLL	735.464	6.433	30	4	3.941	0.108	2.694	0.134	3	Medium	0.054	0.21625
	MelB_Na	MELB	442	447	IQIHLL	735.464	6.4398	300	4	4	0.258	6.439	0.455	3	Medium	0.183	0.211132
	MelB_Na	MELB	442	447	IQIHLL	735.464	6.4377	3000	4	4	1.572	39.288	0.448	3	Medium	0.181	0.639422
	MelB_Na	MELB	444	447	IHLL	494.322	4.8908	0	2	0	0	0	n/a	1	Medium	0
	MelB_Na	MELB	444	447	IHLL	494.322	4.9292	30	2	1.946	0.073	3.632	0.1	3	Medium	0.04	0.427579
	MelB_Na	MELB	444	447	IHLL	494.322	4.909	300	2	2	0.21	10.519	0.333	3	Medium	0.134	0.317837
	MelB_Na	MELB	444	447	IHLL	494.322	4.9176	3000	2	2	0.814	40.69	0.064	3	Medium	0.026	0.129493
	MelB_Na	MELB	448	467	DKYRKTPPFVEQPDSPAISV	2273.17	4.536	0	14	0	0	0	n/a	1	High	0
	MelB_Na	MELB	448	467	DKYRKTPPFVEQPDSPAISV	2273.17	4.5259	30	14	13.944	7.38	52.715	0.88	2	Medium	0.098	0.0596512
	MelB_Na	MELB	448	467	DKYRKTPPFVEQPDSPAISV	2273.17	4.5154	300	14	14	7.644	54.599	1.575	3	Medium	0.634	0.372291
	MelB_Na	MELB	448	467	DKYRKTPPFVEQPDSPAISV	2273.17	4.5222	3000	14	14	8.379	59.852	0.69	3	Medium	0.278	0.332435
	MelB_Na	MELB	450	468	YRKTPPFVEQPDSPAISVV	2129.12	5.1263	0	13	0	0	0	n/a	1	High	0
	MelB_Na	MELB	450	468	YRKTPPFVEQPDSPAISVV	2129.12	4.9956	30	13	12.868	6.791	52.241		1	Medium	0
	MelB_Na	MELB	450	468	YRKTPPFVEQPDSPAISVV	2129.12	5.3832	300	13	13	7.076	54.428	1.762	3	Medium	0.709	0.844399
	MelB_Na	MELB	450	468	YRKTPPFVEQPDSPAISVV	2129.12	5.0074	3000	13	13	7.52	57.847	0.649	3	Medium	0.261	0.244546
	MelB_Na	MELB	450	469	YRKTPPFVEQPDSPAISVVA	2200.15	4.8567	0	14	0	0	0	n/a	1	High	0
	MelB_Na	MELB	450	469	YRKTPPFVEQPDSPAISVVA	2200.15	4.8349	30	14	13.868	7.102	50.728	1.549	3	Medium	0.624	0.0437184
	MelB_Na	MELB	450	469	YRKTPPFVEQPDSPAISVVA	2200.15	4.8249	300	14	14	8.211	58.651	1.001	3	Medium	0.403	0.317649
	MelB_Na	MELB	450	469	YRKTPPFVEQPDSPAISVVA	2200.15	4.819	3000	14	14	8.659	61.85	0.477	3	High	0.192	0.98644
