# Supplementary material for: Allosteric effects of the coupling cation in melibiose transporter MelB
Source: eLife. 2026 Jan 28;14:RP108335. doi: 10.7554/eLife.108335 (PMC12851581; doi:10.7554/eLife.108335)
Supplement: Figure 5—source data 2. [file elife-108335-fig5-data2.xlsx]

## Sheet: MelB_mel_Na_summary
	Apo, Mel+Na, Mel
			all positions + 1
	Protein State	Protein	Start	End	Sequence	Peptide Mass	RT (min)	Deut Time (sec)	maxD	Theor Uptake #D	#D	%D	Conf Interval (#D)	#Rep	Confidence	Stddev	p
Apo	Mel	MELB	1	8	SISMTTKL	879.474	4.2284	0	6	0	0	0	n/a	1	High	0
	Mel	MELB	1	8	SISMTTKL	879.474	4.2179	30	6	5.998	2.053	34.215	0.05	3	Medium	0.02
	Mel	MELB	1	8	SISMTTKL	879.474	4.1561	300	6	6	2.355	39.244	0.215	3	Medium	0.087
	Mel	MELB	1	8	SISMTTKL	879.474	4.1744	3000	6	6	2.371	39.524	0.227	3	Medium	0.091
	Mel	MELB	1	9	SISMTTKLS	966.506	3.3167	0	7	0	0	0	n/a	1	High	0
	Mel	MELB	1	9	SISMTTKLS	966.506	3.3349	30	7	6.998	2.419	34.557	0.148	3	Medium	0.059
	Mel	MELB	1	9	SISMTTKLS	966.506	3.2778	300	7	7	2.726	38.943	0.34	3	Medium	0.137
	Mel	MELB	1	9	SISMTTKLS	966.506	3.2999	3000	7	7	3.002	42.883	0.155	3	Medium	0.062
	Mel	MELB	6	14	TKLSYGFGA	942.481	4.7218	0	7	0	0	0	n/a	1	High	0
	Mel	MELB	6	14	TKLSYGFGA	942.481	4.733	30	7	6.998	0.132	1.888	0.054	3	High	0.022
	Mel	MELB	6	14	TKLSYGFGA	942.481	4.686	300	7	7	0.298	4.263	0.07	3	High	0.028
	Mel	MELB	6	14	TKLSYGFGA	942.481	4.679	3000	7	7	0.402	5.741	0.225	3	Medium	0.091
	Mel	MELB	11	18	GFGAFGKD	797.371	4.3908	0	6	0	0	0	n/a	1	Medium	0
	Mel	MELB	11	18	GFGAFGKD	797.371	4.439	30	6	6	0.07	1.174	0.045	3	Medium	0.018
	Mel	MELB	11	18	GFGAFGKD	797.371	4.3981	300	6	6	0.117	1.945	0.116	3	Medium	0.047
	Mel	MELB	11	18	GFGAFGKD	797.371	4.4029	3000	6	6	0.168	2.795	0.127	3	Medium	0.051
	Mel	MELB	12	17	FGAFGK	625.322	3.5697	0	4	0	0	0	n/a	1	Medium	0
	Mel	MELB	12	17	FGAFGK	625.322	3.6751	30	4	4	0.152	3.812	0.028	2	Medium	0.003
	Mel	MELB	12	17	FGAFGK	625.322	3.621	300	4	4	0.19	4.74	0.019	3	Medium	0.007
	Mel	MELB	12	17	FGAFGK	625.322	3.6295	3000	4	4	0.239	5.983	0.137	3	Medium	0.055
	Mel	MELB	12	18	FGAFGKD	740.349	3.8434	0	5	0	0	0	n/a	1	Medium	0
	Mel	MELB	12	18	FGAFGKD	740.349	3.8753	30	5	5	0.08	1.603	0.044	3	Medium	0.018
	Mel	MELB	12	18	FGAFGKD	740.349	3.8294	300	5	5	0.178	3.566	0.062	3	Medium	0.025
	Mel	MELB	12	18	FGAFGKD	740.349	3.8197	3000	5	5	0.167	3.334	0.149	3	Medium	0.06
	Mel	MELB	15	19	FGKDF	612.291	3.5799	0	3	0	0	0	n/a	1	High	0
	Mel	MELB	15	19	FGKDF	612.291	3.5985	30	3	2.999	0.047	1.571	0.019	3	High	0.008
	Mel	MELB	15	19	FGKDF	612.291	3.6017	300	3	3	0.358	11.931	0.085	3	Medium	0.034
	Mel	MELB	15	19	FGKDF	612.291	3.571	3000	3	3	0.342	11.396	0.185	3	Medium	0.074
	Mel	MELB	20	26	AIGIVYM	765.409	7.0083	0	5	0	0	0	n/a	1	Medium	0
	Mel	MELB	20	26	AIGIVYM	765.409	7.0272	30	5	4.868	0.017	0.343	0.062	3	Medium	0.025
	Mel	MELB	20	26	AIGIVYM	765.409	7.0325	300	5	5	0.596	11.914	0.354	3	Medium	0.143
	Mel	MELB	20	26	AIGIVYM	765.409	6.9997	3000	5	5	0.697	13.934	0.763	3	Medium	0.307
	Mel	MELB	23	25	IVY	393.226	3.2056	0	1	0	0	0	n/a	1	Medium	0
	Mel	MELB	23	25	IVY	393.226	3.216	30	1	0.999	0.001	0.086	0.007	3	Medium	0.003
	Mel	MELB	23	25	IVY	393.226	3.1784	300	1	1	0.081	8.083	0.072	3	Medium	0.029
	Mel	MELB	23	25	IVY	393.226	3.1588	3000	1	1	0.072	7.231	0.039	3	Medium	0.016
	Mel	MELB	23	28	IVYMYL	800.414	8.4439	0	4	0	0	0	n/a	1	High	0
	Mel	MELB	23	28	IVYMYL	800.414	8.4539	30	4	3.994	-0.002	-0.047	0.011	3	High	0.004
	Mel	MELB	23	28	IVYMYL	800.414	8.4351	300	4	4	0.14	3.51	0.133	3	High	0.053
	Mel	MELB	23	28	IVYMYL	800.414	8.4446	3000	4	4	0.134	3.362	0.231	3	High	0.093
	Mel	MELB	26	28	MYL	425.198	5.5581	0	1	0	0	0	n/a	1	High	0
	Mel	MELB	26	28	MYL	425.198	5.5183	30	1	0.995	0.006	0.626	0.005	3	Medium	0.002
	Mel	MELB	26	28	MYL	425.198	5.4908	300	1	1	0.001	0.061	0.004	3	High	0.002
	Mel	MELB	26	28	MYL	425.198	5.514	3000	1	1	0.005	0.458	0.024	3	Medium	0.01
	Mel	MELB	29	31	MYY	475.178	4.2235	0	1	0	0	0	n/a	1	Medium	0
	Mel	MELB	29	31	MYY	475.178	4.1439	30	1	1	0.014	1.444	0.016	3	Medium	0.006
	Mel	MELB	29	31	MYY	475.178	4.1104	300	1	1	0.014	1.357	0.025	3	Medium	0.01
	Mel	MELB	29	31	MYY	475.178	4.1138	3000	1	1	0.042	4.176	0.092	3	Medium	0.037
	Mel	MELB	29	34	MYYYTD	854.316	4.5688	0	4	0	0	0	n/a	1	High	0
	Mel	MELB	29	34	MYYYTD	854.316	4.5851	30	4	4	0.038	0.961	0.018	3	High	0.007
	Mel	MELB	29	34	MYYYTD	854.316	4.5629	300	4	4	0.087	2.172	0.02	3	High	0.008
	Mel	MELB	29	34	MYYYTD	854.316	4.5922	3000	4	4	0.072	1.802	0.067	3	High	0.027
	Mel	MELB	35	46	VVGLSVGLVGTL	1112.68	8.2186	0	10	0	0	0	n/a	1	Medium	0
	Mel	MELB	35	46	VVGLSVGLVGTL	1112.68	8.1724	30	10	9.885	0.295	2.952	0.109	3	Medium	0.044
	Mel	MELB	35	46	VVGLSVGLVGTL	1112.68	8.1422	300	10	10	0.656	6.56	0.381	3	Medium	0.153
	Mel	MELB	35	46	VVGLSVGLVGTL	1112.68	8.1779	3000	10	10	0.672	6.721	0.339	3	Medium	0.136
	Mel	MELB	42	46	LVGTL	501.316	3.9808	0	3	0	0	0	n/a	1	Medium	0
	Mel	MELB	42	46	LVGTL	501.316	3.9818	30	3	2.999	0.008	0.252	0.017	3	Medium	0.007
	Mel	MELB	42	46	LVGTL	501.316	3.9658	300	3	3	0.02	0.665	0.007	3	Medium	0.003
	Mel	MELB	42	46	LVGTL	501.316	3.9756	3000	3	3	0.024	0.788	0.02	3	Medium	0.008
	Mel	MELB	45	48	TLFL	492.295	7.4907	0	2	0	0	0	n/a	1	Medium	0
	Mel	MELB	45	48	TLFL	492.295	7.527	30	2	1.994	0.003	0.136	0.042	3	Medium	0.017
	Mel	MELB	45	48	TLFL	492.295	7.459	300	2	2	0.014	0.689	0.112	3	Medium	0.045
	Mel	MELB	45	48	TLFL	492.295	7.4454	3000	2	2	0.022	1.097	0.088	3	Medium	0.036
	Mel	MELB	47	51	FLVAR	604.37	2.6827	0	3	0	0	0	n/a	1	Medium	0
	Mel	MELB	47	51	FLVAR	604.37	2.7348	30	3	2.888	0.01	0.344	0.013	3	High	0.005
	Mel	MELB	47	51	FLVAR	604.37	2.6789	300	3	3	0.005	0.174	0.019	3	High	0.007
	Mel	MELB	47	51	FLVAR	604.37	2.7086	3000	3	3	0.014	0.471	0.008	3	High	0.003
	Mel	MELB	47	53	FLVARIW	903.533	7.7147	0	5	0	0	0	n/a	1	High	0
	Mel	MELB	47	53	FLVARIW	903.533	7.7148	30	5	4.867	0.021	0.423	0.004	3	High	0.002
	Mel	MELB	47	53	FLVARIW	903.533	7.6547	300	5	5	0.032	0.644	0.01	3	High	0.004
	Mel	MELB	47	53	FLVARIW	903.533	7.6598	3000	5	5	0.029	0.583	0.012	3	High	0.005
	Mel	MELB	48	53	LVARIW	756.465	5.7224	0	4	0	0	0	n/a	1	High	0
	Mel	MELB	48	53	LVARIW	756.465	5.7389	30	4	3.979	0.015	0.375	0.021	3	Medium	0.008
	Mel	MELB	48	53	LVARIW	756.465	5.7145	300	4	4	0.019	0.48	0.044	3	Medium	0.018
	Mel	MELB	48	53	LVARIW	756.465	5.6969	3000	4	4	0.015	0.369	0.009	3	Medium	0.004
	Mel	MELB	49	53	VARIW	643.381	4.7377	0	3	0	0	0	n/a	1	High	0
	Mel	MELB	49	53	VARIW	643.381	4.7667	30	3	2.979	0.024	0.788	0.004	3	High	0.002
	Mel	MELB	49	53	VARIW	643.381	4.6895	300	3	3	0.022	0.733	0.008	3	High	0.003
	Mel	MELB	49	53	VARIW	643.381	4.6933	3000	3	3	0.017	0.58	0.022	3	High	0.009
	Mel	MELB	52	61	IWDAINDPIM	1186.57	8.1592	0	7	0	0	0	n/a	1	High	0
	Mel	MELB	52	61	IWDAINDPIM	1186.57	8.183	30	7	6.817	0.046	0.664	0.011	3	High	0.004
	Mel	MELB	52	61	IWDAINDPIM	1186.57	8.1335	300	7	7	0.106	1.515	0.054	3	High	0.022
	Mel	MELB	52	61	IWDAINDPIM	1186.57	8.1361	3000	7	7	0.084	1.207	0.093	3	High	0.038
	Mel	MELB	52	66	IWDAINDPIMGWIVN	1755.87	10.943	0	12	0	0	0	n/a	1	High	0
	Mel	MELB	52	66	IWDAINDPIMGWIVN	1755.87	10.9401	30	12	11.617	0.08	0.666	0.027	3	Medium	0.011
	Mel	MELB	52	66	IWDAINDPIMGWIVN	1755.87	10.8917	300	12	12	0.204	1.697	0.161	3	High	0.065
	Mel	MELB	52	66	IWDAINDPIMGWIVN	1755.87	10.8873	3000	12	12	0.209	1.738	0.223	3	Medium	0.09
	Mel	MELB	54	65	DAINDPIMGWIV	1342.66	10.5697	0	9	0	0	0	n/a	1	High	0
	Mel	MELB	54	65	DAINDPIMGWIV	1342.66	10.5821	30	9	8.617	0.057	0.634	0.033	3	High	0.013
	Mel	MELB	54	65	DAINDPIMGWIV	1342.66	10.5421	300	9	9	0.144	1.601	0.088	3	High	0.035
	Mel	MELB	54	65	DAINDPIMGWIV	1342.66	10.5602	3000	9	9	0.109	1.212	0.128	3	High	0.051
	Mel	MELB	58	65	DPIMGWIV	929.468	9.8469	0	6	0	0	0	n/a	1	High	0
	Mel	MELB	58	65	DPIMGWIV	929.468	9.8524	30	6	5.653	0.037	0.618	0.027	3	High	0.011
	Mel	MELB	58	65	DPIMGWIV	929.468	9.8377	300	6	6	0.064	1.06	0.05	3	High	0.02
	Mel	MELB	58	65	DPIMGWIV	929.468	9.8103	3000	6	6	0.055	0.915	0.081	3	High	0.033
	Mel	MELB	67	76	ATRSRWGKFK	1235.69	1.782	0	8	0	0	0	n/a	1	Medium	0
	Mel	MELB	67	76	ATRSRWGKFK	1235.69	1.8254	30	8	8	0.18	2.244	0.131	3	Medium	0.053
	Mel	MELB	67	76	ATRSRWGKFK	1235.69	1.8101	300	8	8	0.423	5.292	0.347	3	Medium	0.14
	Mel	MELB	67	76	ATRSRWGKFK	1235.69	1.9044	3000	8	8	0.451	5.641	0.371	3	Medium	0.149
	Mel	MELB	70	76	SRWGKFK	907.503	2.2042	0	5	0	0	0	n/a	1	Medium	0
	Mel	MELB	70	76	SRWGKFK	907.503	2.2655	30	5	5	0.094	1.876	0.004	3	Medium	0.002
	Mel	MELB	70	76	SRWGKFK	907.503	2.2298	300	5	5	0.104	2.08	0.138	3	Medium	0.056
	Mel	MELB	70	76	SRWGKFK	907.503	2.345	3000	5	5	0.133	2.651	0.163	3	Medium	0.066
	Mel	MELB	72	76	WGKFK	664.37	2.7275	0	3	0	0	0	n/a	1	Medium	0
	Mel	MELB	72	76	WGKFK	664.37	2.7385	30	3	3	0.062	2.057	0.017	3	Medium	0.007
	Mel	MELB	72	76	WGKFK	664.37	2.6878	300	3	3	0.156	5.2	0.054	3	Medium	0.022
	Mel	MELB	72	76	WGKFK	664.37	2.7421	3000	3	3	0.241	8.037	0.225	3	Medium	0.091
	Mel	MELB	75	80	FKPWIL	802.474	8.3898	0	3	0	0	0	n/a	1	High	0
	Mel	MELB	75	80	FKPWIL	802.474	8.4185	30	3	2.845	0.024	0.815	0.037	3	High	0.015
	Mel	MELB	75	80	FKPWIL	802.474	8.3582	300	3	3	0.124	4.147	0.135	3	High	0.054
	Mel	MELB	75	80	FKPWIL	802.474	8.3194	3000	3	3	0.209	6.963	0.262	3	High	0.106
	Mel	MELB	81	88	IGTLTNSL	817.455	5.0497	0	6	0	0	0	n/a	1	Medium	0
	Mel	MELB	81	88	IGTLTNSL	817.455	5.0122	30	6	5.999	0.036	0.594	0.015	3	High	0.006
	Mel	MELB	81	88	IGTLTNSL	817.455	4.9932	300	6	6	0.087	1.447	0.066	3	High	0.027
	Mel	MELB	81	88	IGTLTNSL	817.455	4.9976	3000	6	6	0.084	1.398	0.085	3	High	0.034
	Mel	MELB	81	90	IGTLTNSLVL	1029.61	7.267	0	8	0	0	0	n/a	1	Medium	0
	Mel	MELB	81	90	IGTLTNSLVL	1029.61	7.3486	30	8	7.855	0.029	0.36	0.008	3	Medium	0.003
	Mel	MELB	81	90	IGTLTNSLVL	1029.61	7.2577	300	8	8	0.073	0.907	0.064	3	Medium	0.026
	Mel	MELB	81	90	IGTLTNSLVL	1029.61	7.3204	3000	8	8	0.068	0.846	0.071	3	Medium	0.028
	Mel	MELB	92	98	LLFSAHL	799.459	6.7833	0	5	0	0	0	n/a	1	Medium	0
	Mel	MELB	92	98	LLFSAHL	799.459	6.7884	30	5	4.998	0.008	0.162	0.102	3	Medium	0.041
	Mel	MELB	92	98	LLFSAHL	799.459	6.7425	300	5	5	0.05	0.995	0.082	3	Medium	0.033
	Mel	MELB	92	98	LLFSAHL	799.459	6.7445	3000	5	5	0.035	0.697	0.065	3	Medium	0.026
	Mel	MELB	93	99	LFSAHLF	833.444	7.2355	0	5	0	0	0	n/a	1	Medium	0
	Mel	MELB	93	99	LFSAHLF	833.444	7.249	30	5	4.998	0.016	0.326	0.017	3	Medium	0.007
	Mel	MELB	93	99	LFSAHLF	833.444	7.1881	300	5	5	0.072	1.44	0.018	3	Medium	0.007
	Mel	MELB	93	99	LFSAHLF	833.444	7.1809	3000	5	5	0.034	0.685	0.054	3	Medium	0.022
	Mel	MELB	94	99	FSAHLF	720.36	6.1753	0	4	0	0	0	n/a	1	High	0
	Mel	MELB	94	99	FSAHLF	720.36	6.1826	30	4	3.998	0.031	0.785	0.01	3	Medium	0.004
	Mel	MELB	94	99	FSAHLF	720.36	6.1252	300	4	4	0.073	1.828	0.042	3	High	0.017
	Mel	MELB	94	99	FSAHLF	720.36	6.1179	3000	4	4	0.059	1.485	0.053	3	Medium	0.021
	Mel	MELB	98	106	LFEGTAQVV	962.507	5.118	0	7	0	0	0	n/a	1	Medium	0
	Mel	MELB	98	106	LFEGTAQVV	962.507	5.1484	30	7	6.92	0.07	1	0.072	3	Medium	0.029
	Mel	MELB	98	106	LFEGTAQVV	962.507	5.1532	300	7	7	0.137	1.964	0.045	3	Medium	0.018
	Mel	MELB	98	106	LFEGTAQVV	962.507	5.1542	3000	7	7	0.16	2.291	0.122	3	Medium	0.049
	Mel	MELB	100	106	EGTAQVV	702.355	2.2568	0	5	0	0	0	n/a	1	Medium	0
	Mel	MELB	100	106	EGTAQVV	702.355	2.3115	30	5	4.92	0.018	0.357	0.115	3	Medium	0.046
	Mel	MELB	100	106	EGTAQVV	702.355	2.2582	300	5	5	0.137	2.733	0.207	3	Medium	0.083
	Mel	MELB	100	106	EGTAQVV	702.355	2.3022	3000	5	5	0.142	2.842	0.059	3	Medium	0.024
	Mel	MELB	100	109	EGTAQVVFVC	1051.5	6.4519	0	8	0	0	0	n/a	1	High	0
	Mel	MELB	100	109	EGTAQVVFVC	1051.5	6.4389	30	8	7.903	0.002	0.023	0.021	3	High	0.008
	Mel	MELB	100	109	EGTAQVVFVC	1051.5	6.3979	300	8	8	0.123	1.536	0.082	3	High	0.033
	Mel	MELB	100	109	EGTAQVVFVC	1051.5	6.3936	3000	8	8	0.079	0.988	0.156	3	High	0.063
	Mel	MELB	119	122	YTIM	526.246	4.8279	0	2	0	0	0	n/a	1	High	0
	Mel	MELB	119	122	YTIM	526.246	4.8359	30	2	1.995	0.014	0.713	0.014	3	High	0.005
	Mel	MELB	119	122	YTIM	526.246	4.7975	300	2	2	0.052	2.597	0.028	3	High	0.011
	Mel	MELB	119	122	YTIM	526.246	4.7878	3000	2	2	0.029	1.464	0.03	3	High	0.012
	Mel	MELB	120	129	TIMDIPFWSL	1221.61	11.5535	0	7	0	0	0	n/a	1	High	0
	Mel	MELB	120	129	TIMDIPFWSL	1221.61	11.5767	30	7	6.889	0.038	0.545	0.025	3	High	0.01
	Mel	MELB	120	129	TIMDIPFWSL	1221.61	11.5147	300	7	7	0.175	2.495	0.111	3	High	0.045
	Mel	MELB	120	129	TIMDIPFWSL	1221.61	11.5042	3000	7	7	0.132	1.881	0.221	3	High	0.089
	Mel	MELB	123	129	DIPFWSL	876.438	10.3845	0	4	0	0	0	n/a	1	Medium	0
	Mel	MELB	123	129	DIPFWSL	876.438	10.4511	30	4	3.997	0.024	0.596	0.013	3	Medium	0.005
	Mel	MELB	123	129	DIPFWSL	876.438	10.3929	300	4	4	0.094	2.345	0.066	3	Medium	0.027
	Mel	MELB	123	129	DIPFWSL	876.438	10.349	3000	4	4	0.059	1.483	0.091	3	Medium	0.037
	Mel	MELB	124	129	IPFWSL	761.411	10.0469	0	4	0	0	0	n/a	1	High	0
	Mel	MELB	124	129	IPFWSL	761.411	10.0227	30	4	3.997	0.027	0.683	0.018	3	High	0.007
	Mel	MELB	124	129	IPFWSL	761.411	9.9812	300	4	4	0.134	3.355	0.109	3	High	0.044
	Mel	MELB	124	129	IPFWSL	761.411	9.9744	3000	4	4	0.091	2.274	0.185	3	High	0.075
	Mel	MELB	130	135	VPTITL	642.395	6.0491	0	4	0	0	0	n/a	1	Medium	0
	Mel	MELB	130	135	VPTITL	642.395	6.05	30	4	3.994	0.047	1.186	0.022	3	Medium	0.009
	Mel	MELB	130	135	VPTITL	642.395	6.0498	300	4	4	0.065	1.631	0.063	3	Medium	0.025
	Mel	MELB	130	135	VPTITL	642.395	6.0351	3000	4	4	0.086	2.143	0.068	3	Medium	0.027
	Mel	MELB	130	137	VPTITLDK	885.517	3.6374	0	6	0	0	0	n/a	1	Medium	0
	Mel	MELB	130	137	VPTITLDK	885.517	3.623	30	6	5.994	0.209	3.491	0.062	3	Medium	0.025
	Mel	MELB	130	137	VPTITLDK	885.517	3.5999	300	6	6	0.346	5.758	0.152	3	Medium	0.061
	Mel	MELB	130	137	VPTITLDK	885.517	3.5588	3000	6	6	0.421	7.017	0.38	3	Medium	0.153
	Mel	MELB	136	149	DKREREQLVPFPRF	1815.97	5.9509	0	10	0	0	0	n/a	1	High	0
	Mel	MELB	136	149	DKREREQLVPFPRF	1815.97	5.936	30	10	9.885	0.409	4.086	0.088	3	High	0.035
	Mel	MELB	136	149	DKREREQLVPFPRF	1815.97	5.8254	300	10	10	0.915	9.15	0.294	3	Medium	0.118
	Mel	MELB	136	149	DKREREQLVPFPRF	1815.97	5.9015	3000	10	10	1.569	15.686	0.925	3	Medium	0.372
	Mel	MELB	138	149	REREQLVPFPRF	1572.85	6.1247	0	8	0	0	0	n/a	1	High	0
	Mel	MELB	138	149	REREQLVPFPRF	1572.85	6.0843	30	8	7.885	0.28	3.505	0.051	3	High	0.02
	Mel	MELB	138	149	REREQLVPFPRF	1572.85	6.0353	300	8	8	0.575	7.185	0.242	3	Medium	0.097
	Mel	MELB	138	149	REREQLVPFPRF	1572.85	6.0315	3000	8	8	0.861	10.758	0.58	3	Medium	0.234
	Mel	MELB	139	149	EREQLVPFPRF	1416.75	6.9006	0	7	0	0	0	n/a	1	Medium	0
	Mel	MELB	139	149	EREQLVPFPRF	1416.75	6.8564	30	7	6.885	0.317	4.531	0.048	3	Medium	0.019
	Mel	MELB	139	149	EREQLVPFPRF	1416.75	6.821	300	7	7	0.602	8.605	0.184	3	Medium	0.074
	Mel	MELB	139	149	EREQLVPFPRF	1416.75	6.8437	3000	7	7	1.127	16.095	0.635	3	Medium	0.255
	Mel	MELB	139	150	EREQLVPFPRFF	1563.82	8.3578	0	8	0	0	0	n/a	1	Medium	0
	Mel	MELB	139	150	EREQLVPFPRFF	1563.82	8.404	30	8	7.885	0.337	4.211	0.114	3	Medium	0.046
	Mel	MELB	139	150	EREQLVPFPRFF	1563.82	8.3262	300	8	8	0.659	8.243	0.199	3	Medium	0.08
	Mel	MELB	139	150	EREQLVPFPRFF	1563.82	8.3357	3000	8	8	1.095	13.693	0.369	3	Medium	0.148
	Mel	MELB	140	149	REQLVPFPRF	1287.71	6.8223	0	6	0	0	0	n/a	1	High	0
	Mel	MELB	140	149	REQLVPFPRF	1287.71	6.8021	30	6	5.885	0.21	3.506	0.118	3	High	0.048
	Mel	MELB	140	149	REQLVPFPRF	1287.71	6.7496	300	6	6	0.462	7.708	0.207	3	Medium	0.084
	Mel	MELB	140	149	REQLVPFPRF	1287.71	6.7369	3000	6	6	0.766	12.76	0.294	3	Medium	0.118
	Mel	MELB	141	149	EQLVPFPRF	1131.61	7.752	0	5	0	0	0	n/a	1	Medium	0
	Mel	MELB	141	149	EQLVPFPRF	1131.61	7.7264	30	5	4.885	0.221	4.423	0.045	3	Medium	0.018
	Mel	MELB	141	149	EQLVPFPRF	1131.61	7.6834	300	5	5	0.412	8.233	0.149	3	Medium	0.06
	Mel	MELB	141	149	EQLVPFPRF	1131.61	7.6948	3000	5	5	0.695	13.897	0.328	3	Medium	0.132
	Mel	MELB	141	150	EQLVPFPRFF	1278.68	9.3429	0	6	0	0	0	n/a	1	High	0
	Mel	MELB	141	150	EQLVPFPRFF	1278.68	9.3553	30	6	5.885	0.254	4.225	0.073	3	Medium	0.029
	Mel	MELB	141	150	EQLVPFPRFF	1278.68	9.3281	300	6	6	0.413	6.879	0.147	3	Medium	0.059
	Mel	MELB	141	150	EQLVPFPRFF	1278.68	9.3005	3000	6	6	0.734	12.238	0.339	3	Medium	0.136
	Mel	MELB	142	149	QLVPFPRF	1002.57	7.6458	0	4	0	0	0	n/a	1	High	0
	Mel	MELB	142	149	QLVPFPRF	1002.57	7.6645	30	4	3.885	0.132	3.295	0.026	3	High	0.01
	Mel	MELB	142	149	QLVPFPRF	1002.57	7.6231	300	4	4	0.273	6.822	0.154	3	High	0.062
	Mel	MELB	142	149	QLVPFPRF	1002.57	7.6094	3000	4	4	0.435	10.871	0.293	3	Medium	0.118
	Mel	MELB	143	149	LVPFPRF	874.506	7.4483	0	3	0	0	0	n/a	1	Medium	0
	Mel	MELB	143	149	LVPFPRF	874.506	7.5108	30	3	2.997	0.1	3.341	0.013	3	Medium	0.005
	Mel	MELB	143	149	LVPFPRF	874.506	7.3343	300	3	3	0.227	7.574	0.136	3	Medium	0.055
	Mel	MELB	143	149	LVPFPRF	874.506	7.432	3000	3	3	0.326	10.868	0.115	3	Medium	0.046
	Mel	MELB	150	155	FASLAG	564.291	3.6697	0	4	0	0	0	n/a	1	Medium	0
	Mel	MELB	150	155	FASLAG	564.291	3.7229	30	4	4	0.254	6.344	0.19	3	Medium	0.077
	Mel	MELB	150	155	FASLAG	564.291	3.6579	300	4	4	0.155	3.864	0.114	3	Medium	0.046
	Mel	MELB	150	155	FASLAG	564.291	3.6542	3000	4	4	0.698	17.459	0.194	3	Medium	0.078
	Mel	MELB	153	158	LAGFVT	606.338	5.0443	0	4	0	0	0	n/a	1	Medium	0
	Mel	MELB	153	158	LAGFVT	606.338	5.0246	30	4	3.983	0.133	3.314	0.045	3	Medium	0.018
	Mel	MELB	153	158	LAGFVT	606.338	4.9801	300	4	4	0.252	6.3	0.094	3	Medium	0.038
	Mel	MELB	153	158	LAGFVT	606.338	4.9764	3000	4	4	0.563	14.065	0.189	3	Medium	0.076
	Mel	MELB	154	168	AGFVTAGITLPFVSY	1541.81	9.8362	0	12	0	0	0	n/a	1	High	0
	Mel	MELB	154	168	AGFVTAGITLPFVSY	1541.81	9.8522	30	12	11.956	0.281	2.345	0.111	3	High	0.044
	Mel	MELB	154	168	AGFVTAGITLPFVSY	1541.81	9.785	300	12	12	0.582	4.847	0.27	3	High	0.109
	Mel	MELB	154	168	AGFVTAGITLPFVSY	1541.81	9.8487	3000	12	12	0.939	7.821	0.564	3	Medium	0.227
	Mel	MELB	156	163	FVTAGITL	820.47	6.8511	0	6	0	0	0	n/a	1	Medium	0
	Mel	MELB	156	163	FVTAGITL	820.47	6.8162	30	6	5.992	0.068	1.134	0.186	3	Medium	0.075
	Mel	MELB	156	163	FVTAGITL	820.47	6.8491	300	6	6	0.132	2.196	0.005	3	Medium	0.002
	Mel	MELB	156	163	FVTAGITL	820.47	6.853	3000	6	6	0.201	3.343	0.364	3	Medium	0.147
	Mel	MELB	157	168	VTAGITLPFVSY	1266.69	8.7686	0	9	0	0	0	n/a	1	Medium	0
	Mel	MELB	157	168	VTAGITLPFVSY	1266.69	8.7727	30	9	8.973	0.128	1.427	0.044	3	Medium	0.018
	Mel	MELB	157	168	VTAGITLPFVSY	1266.69	8.739	300	9	9	0.332	3.687	0.195	3	Medium	0.079
	Mel	MELB	157	168	VTAGITLPFVSY	1266.69	8.7545	3000	9	9	0.409	4.544	0.386	3	Medium	0.155
	Mel	MELB	159	168	AGITLPFVSY	1066.57	8.8162	0	7	0	0	0	n/a	1	High	0
	Mel	MELB	159	168	AGITLPFVSY	1066.57	8.8207	30	7	6.973	0.134	1.917	0.03	3	High	0.012
	Mel	MELB	159	168	AGITLPFVSY	1066.57	8.7757	300	7	7	0.31	4.433	0.17	3	High	0.068
	Mel	MELB	159	168	AGITLPFVSY	1066.57	8.7431	3000	7	7	0.517	7.384	0.286	3	Medium	0.115
	Mel	MELB	169	180	VGGADRGFGFQM	1240.57	6.6104	0	10	0	0	0	n/a	1	Medium	0
	Mel	MELB	169	180	VGGADRGFGFQM	1240.57	6.5974	30	10	10	0.106	1.056	0.021	3	Medium	0.008
	Mel	MELB	169	180	VGGADRGFGFQM	1240.57	6.5724	300	10	10	0.248	2.48	0.18	3	Medium	0.072
	Mel	MELB	169	180	VGGADRGFGFQM	1240.57	6.5755	3000	10	10	0.249	2.491	0.38	3	Medium	0.153
	Mel	MELB	174	180	RGFGFQM	841.39	6.5103	0	5	0	0	0	n/a	1	Medium	0
	Mel	MELB	174	180	RGFGFQM	841.39	6.5061	30	5	5	0.02	0.391	0.019	3	Medium	0.008
	Mel	MELB	174	180	RGFGFQM	841.39	6.4633	300	5	5	0.072	1.435	0.057	3	Medium	0.023
	Mel	MELB	174	180	RGFGFQM	841.39	6.4683	3000	5	5	0.045	0.896	0.114	3	Medium	0.046
	Mel	MELB	184	187	VLIA	414.284	3.3589	0	2	0	0	0	n/a	1	Medium	0
	Mel	MELB	184	187	VLIA	414.284	3.414	30	2	1.871	0.002	0.095	0.002	3	Medium	0.001
	Mel	MELB	184	187	VLIA	414.284	3.357	300	2	2	0.003	0.152	0.004	3	Medium	0.002
	Mel	MELB	184	187	VLIA	414.284	3.3724	3000	2	2	0.001	0.066	0.007	3	Medium	0.003
	Mel	MELB	186	191	IAFFIA	680.39	8.6823	0	4	0	0	0	n/a	1	Medium	0
	Mel	MELB	186	191	IAFFIA	680.39	8.6814	30	4	3.979	0.006	0.153	0.012	3	Medium	0.005
	Mel	MELB	186	191	IAFFIA	680.39	8.6593	300	4	4	0.004	0.095	0.025	3	Medium	0.01
	Mel	MELB	186	191	IAFFIA	680.39	8.6284	3000	4	4	0.015	0.373	0.008	3	Medium	0.003
	Mel	MELB	190	198	IASTIVTLR	972.597	3.9385	0	7	0	0	0	n/a	1	Medium	0
	Mel	MELB	190	198	IASTIVTLR	972.597	3.9092	30	7	6.871	0.031	0.442	0.05	3	Medium	0.02
	Mel	MELB	190	198	IASTIVTLR	972.597	3.8486	300	7	7	0.092	1.311	0.062	3	Medium	0.025
	Mel	MELB	190	198	IASTIVTLR	972.597	3.8394	3000	7	7	0.11	1.567	0.18	3	Medium	0.072
	Mel	MELB	192	198	STIVTLR	788.476	3.0198	0	5	0	0	0	n/a	1	Medium	0
	Mel	MELB	192	198	STIVTLR	788.476	3.0214	30	5	4.871	0.04	0.791	0.009	3	Medium	0.004
	Mel	MELB	192	198	STIVTLR	788.476	3.0106	300	5	5	0.089	1.772	0.045	3	Medium	0.018
	Mel	MELB	192	198	STIVTLR	788.476	3.027	3000	5	5	0.069	1.383	0.065	3	Medium	0.026
	Mel	MELB	192	199	STIVTLRN	902.519	2.7117	0	6	0	0	0	n/a	1	Medium	0
	Mel	MELB	192	199	STIVTLRN	902.519	2.7489	30	6	5.871	0.147	2.454	0.12	3	Medium	0.048
	Mel	MELB	192	199	STIVTLRN	902.519	2.6948	300	6	6	0.172	2.873	0.195	3	Medium	0.079
	Mel	MELB	192	199	STIVTLRN	902.519	2.7156	3000	6	6	0.132	2.194	0.099	3	Medium	0.04
	Mel	MELB	192	200	STIVTLRNV	1001.59	4.4955	0	7	0	0	0	n/a	1	Medium	0
	Mel	MELB	192	200	STIVTLRNV	1001.59	4.4971	30	7	6.87	0.058	0.828	0.025	3	Medium	0.01
	Mel	MELB	192	200	STIVTLRNV	1001.59	4.4418	300	7	7	0.171	2.438	0.075	3	Medium	0.03
	Mel	MELB	192	200	STIVTLRNV	1001.59	4.4382	3000	7	7	0.157	2.24	0.215	3	Medium	0.087
	Mel	MELB	192	201	STIVTLRNVH	1138.65	2.8416	0	8	0	0	0	n/a	1	Medium	0
	Mel	MELB	192	201	STIVTLRNVH	1138.65	2.8587	30	8	7.87	0.065	0.808	0.013	3	Medium	0.005
	Mel	MELB	192	201	STIVTLRNVH	1138.65	2.797	300	8	8	0.121	1.507	0.04	3	Medium	0.016
	Mel	MELB	192	201	STIVTLRNVH	1138.65	2.8558	3000	8	8	0.08	1.006	0.086	3	Medium	0.035
	Mel	MELB	192	203	STIVTLRNVHEV	1366.76	3.9623	0	10	0	0	0	n/a	1	High	0
	Mel	MELB	192	203	STIVTLRNVHEV	1366.76	3.9534	30	10	9.792	0.096	0.964	0.024	3	High	0.01
	Mel	MELB	192	203	STIVTLRNVHEV	1366.76	3.911	300	10	10	0.23	2.297	0.279	3	High	0.112
	Mel	MELB	192	203	STIVTLRNVHEV	1366.76	3.9039	3000	10	10	0.282	2.822	0.336	3	High	0.135
	Mel	MELB	194	197	IVTL	444.295	4.5424	0	2	0	0	0	n/a	1	Medium	0
	Mel	MELB	194	197	IVTL	444.295	4.5376	30	2	1.999	0.04	1.988	0.02	3	Medium	0.008
	Mel	MELB	194	197	IVTL	444.295	4.4997	300	2	2	0.043	2.129	0.12	3	Medium	0.048
	Mel	MELB	194	197	IVTL	444.295	4.5213	3000	2	2	0.003	0.125	0.059	3	Medium	0.024
	Mel	MELB	194	198	IVTLR	600.396	2.299	0	3	0	0	0	n/a	1	Medium	0
	Mel	MELB	194	198	IVTLR	600.396	2.3328	30	3	2.999	0.004	0.147	0.014	3	Medium	0.006
	Mel	MELB	194	198	IVTLR	600.396	2.2935	300	3	3	0.034	1.145	0.044	3	Medium	0.018
	Mel	MELB	194	198	IVTLR	600.396	2.3431	3000	3	3	0.018	0.589	0.045	3	Medium	0.018
	Mel	MELB	194	199	IVTLRN	714.439	2.0768	0	4	0	0	0	n/a	1	Medium	0
	Mel	MELB	194	199	IVTLRN	714.439	2.1204	30	4	3.999	0.036	0.901	0.06	3	Medium	0.024
	Mel	MELB	194	199	IVTLRN	714.439	2.0637	300	4	4	0.052	1.311	0.028	3	Medium	0.011
	Mel	MELB	194	199	IVTLRN	714.439	2.1235	3000	4	4	0.015	0.366	0.07	3	Medium	0.028
	Mel	MELB	194	200	IVTLRNV	813.507	3.9756	0	5	0	0	0	n/a	1	Medium	0
	Mel	MELB	194	200	IVTLRNV	813.507	3.9942	30	5	4.999	0.041	0.821	0.049	3	Medium	0.02
	Mel	MELB	194	200	IVTLRNV	813.507	3.9393	300	5	5	0.115	2.307	0.098	3	Medium	0.039
	Mel	MELB	194	200	IVTLRNV	813.507	3.9809	3000	5	5	0.155	3.097	0.075	3	Medium	0.03
	Mel	MELB	194	201	IVTLRNVH	950.566	2.1962	0	6	0	0	0	n/a	1	Medium	0
	Mel	MELB	194	201	IVTLRNVH	950.566	2.2248	30	6	5.999	0.069	1.152	0.043	3	Medium	0.017
	Mel	MELB	194	201	IVTLRNVH	950.566	2.2051	300	6	6	0.159	2.65	0.03	3	Medium	0.012
	Mel	MELB	194	201	IVTLRNVH	950.566	2.2402	3000	6	6	0.144	2.397	0.152	3	Medium	0.061
	Mel	MELB	194	203	IVTLRNVHEV	1178.68	3.4249	0	8	0	0	0	n/a	1	Medium	0
	Mel	MELB	194	203	IVTLRNVHEV	1178.68	3.4438	30	8	7.921	0.091	1.132	0.059	3	Medium	0.024
	Mel	MELB	194	203	IVTLRNVHEV	1178.68	3.4258	300	8	8	0.204	2.553	0.225	3	Medium	0.091
	Mel	MELB	194	203	IVTLRNVHEV	1178.68	3.4344	3000	8	8	0.241	3.007	0.412	3	Medium	0.166
	Mel	MELB	194	204	IVTLRNVHEVY	1341.74	4.1416	0	9	0	0	0	n/a	1	Medium	0
	Mel	MELB	194	204	IVTLRNVHEVY	1341.74	4.1564	30	9	8.92	0.128	1.422	0.015	3	High	0.006
	Mel	MELB	194	204	IVTLRNVHEVY	1341.74	4.0966	300	9	9	0.31	3.441	0.203	3	High	0.082
	Mel	MELB	194	204	IVTLRNVHEVY	1341.74	4.0914	3000	9	9	0.316	3.515	0.27	3	High	0.109
	Mel	MELB	208	217	NGVTAGRPHL	1020.55	2.1697	0	7	0	0	0	n/a	1	Medium	0
	Mel	MELB	208	217	NGVTAGRPHL	1020.55	2.2107	30	7	6.995	0.233	3.335	0.033	3	Medium	0.013
	Mel	MELB	208	217	NGVTAGRPHL	1020.55	2.1715	300	7	7	0.331	4.726	0.024	3	Medium	0.01
	Mel	MELB	208	217	NGVTAGRPHL	1020.55	2.2686	3000	7	7	0.26	3.719	0.396	3	Medium	0.159
	Mel	MELB	212	225	AGRPHLTLKTIVGL	1474.9	5.7772	0	11	0	0	0	n/a	1	Medium	0
	Mel	MELB	212	225	AGRPHLTLKTIVGL	1474.9	5.791	30	11	10.87	0.641	5.826	0.387	3	Medium	0.156
	Mel	MELB	212	225	AGRPHLTLKTIVGL	1474.9	5.7231	300	11	11	1.194	10.853	0.359	3	Medium	0.144
	Mel	MELB	212	225	AGRPHLTLKTIVGL	1474.9	5.7052	3000	11	11	0.984	8.945	0.463	3	Medium	0.186
	Mel	MELB	219	225	LKTIVGL	742.495	5.0338	0	5	0	0	0	n/a	1	Medium	0
	Mel	MELB	219	225	LKTIVGL	742.495	5.0382	30	5	4.87	0.271	5.43	0.031	3	Medium	0.013
	Mel	MELB	219	225	LKTIVGL	742.495	5.0211	300	5	5	0.351	7.028	0.159	3	Medium	0.064
	Mel	MELB	219	225	LKTIVGL	742.495	4.9541	3000	5	5	0.597	11.942	0.337	3	Medium	0.135
	Mel	MELB	219	227	LKTIVGLIY	1018.64	7.4528	0	7	0	0	0	n/a	1	High	0
	Mel	MELB	219	227	LKTIVGLIY	1018.64	7.4589	30	7	6.738	0.226	3.227	0.054	3	High	0.022
	Mel	MELB	219	227	LKTIVGLIY	1018.64	7.4053	300	7	7	0.306	4.371	0.169	3	Medium	0.068
	Mel	MELB	219	227	LKTIVGLIY	1018.64	7.391	3000	7	7	0.467	6.669	0.432	3	Medium	0.174
	Mel	MELB	220	225	KTIVGL	629.411	3.8592	0	4	0	0	0	n/a	1	Medium	0
	Mel	MELB	220	225	KTIVGL	629.411	3.8383	30	4	3.87	0.049	1.226	0.006	3	Medium	0.003
	Mel	MELB	220	225	KTIVGL	629.411	3.7765	300	4	4	0.066	1.639	0.062	3	Medium	0.025
	Mel	MELB	220	225	KTIVGL	629.411	3.8145	3000	4	4	0.253	6.33	0.253	3	Medium	0.102
	Mel	MELB	220	227	KTIVGLIY	905.559	6.2119	0	6	0	0	0	n/a	1	Medium	0
	Mel	MELB	220	227	KTIVGLIY	905.559	6.2604	30	6	5.738	0.065	1.091	0.001	3	Medium	0
	Mel	MELB	220	227	KTIVGLIY	905.559	6.256	300	6	6	0.099	1.656	0.122	3	Medium	0.049
	Mel	MELB	220	227	KTIVGLIY	905.559	6.2085	3000	6	6	0.285	4.742	0.235	3	Medium	0.095
	Mel	MELB	221	225	TIVGL	501.316	5.0915	0	3	0	0	0	n/a	1	High	0
	Mel	MELB	221	225	TIVGL	501.316	5.1254	30	3	2.875	0.046	1.541	0.019	3	High	0.008
	Mel	MELB	221	225	TIVGL	501.316	5.0547	300	3	3	0.065	2.158	0.047	3	High	0.019
	Mel	MELB	221	225	TIVGL	501.316	5.0542	3000	3	3	0.199	6.646	0.139	3	High	0.056
	Mel	MELB	222	227	IVGLIY	676.416	6.9396	0	4	0	0	0	n/a	1	Medium	0
	Mel	MELB	222	227	IVGLIY	676.416	7.0063	30	4	3.867	0.022	0.56	0.022	3	Medium	0.009
	Mel	MELB	222	227	IVGLIY	676.416	6.9225	300	4	4	0.063	1.575	0.045	3	Medium	0.018
	Mel	MELB	222	227	IVGLIY	676.416	6.9258	3000	4	4	0.15	3.751	0.131	3	Medium	0.053
	Mel	MELB	226	232	IYKNDQL	892.465	2.6746	0	5	0	0	0	n/a	1	High	0
	Mel	MELB	226	232	IYKNDQL	892.465	2.691	30	5	4.999	0.156	3.119	0.025	3	High	0.01
	Mel	MELB	226	232	IYKNDQL	892.465	2.6578	300	5	5	0.278	5.557	0.053	3	High	0.021
	Mel	MELB	226	232	IYKNDQL	892.465	2.6857	3000	5	5	0.528	10.55	0.377	3	Medium	0.152
	Mel	MELB	226	235	IYKNDQLSCL	1195.59	5.2967	0	8	0	0	0	n/a	1	High	0
	Mel	MELB	226	235	IYKNDQLSCL	1195.59	5.3088	30	8	7.999	0.043	0.533	0.01	3	High	0.004
	Mel	MELB	226	235	IYKNDQLSCL	1195.59	5.2487	300	8	8	0.154	1.928	0.164	3	Medium	0.066
	Mel	MELB	226	235	IYKNDQLSCL	1195.59	5.2371	3000	8	8	0.346	4.329	0.469	3	Medium	0.189
	Mel	MELB	230	235	DQLSCL	677.305	5.5635	0	4	0	0	0	n/a	1	Medium	0
	Mel	MELB	230	235	DQLSCL	677.305	5.5453	30	4	3.999	0.053	1.319	0.015	3	Medium	0.006
	Mel	MELB	230	235	DQLSCL	677.305	5.4944	300	4	4	0.105	2.617	0.095	3	Medium	0.038
	Mel	MELB	230	235	DQLSCL	677.305	5.4962	3000	4	4	0.112	2.795	0.224	3	Medium	0.09
	Mel	MELB	231	235	QLSCL	562.279	5.0602	0	3	0	0	0	n/a	1	Medium	0
	Mel	MELB	231	235	QLSCL	562.279	5.057	30	3	3	-0.015	-0.503	0.042	3	Medium	0.017
	Mel	MELB	231	235	QLSCL	562.279	5.0057	300	3	3	0.01	0.32	0.072	3	Medium	0.029
	Mel	MELB	231	235	QLSCL	562.279	5.0048	3000	3	3	0.084	2.793	0.068	3	Medium	0.028
	Mel	MELB	236	239	LGMA	390.194	2.643	0	2	0	0	0	n/a	1	Medium	0
	Mel	MELB	236	239	LGMA	390.194	2.6204	30	2	2	0.046	2.284	0.019	3	Medium	0.008
	Mel	MELB	236	239	LGMA	390.194	2.6157	300	2	2	0.017	0.827	0.024	3	Medium	0.01
	Mel	MELB	236	239	LGMA	390.194	2.6096	3000	2	2	0.073	3.645	0.008	3	Medium	0.003
	Mel	MELB	240	250	LAYNIASNIIN	1204.65	6.3187	0	9	0	0	0	n/a	1	Medium	0
	Mel	MELB	240	250	LAYNIASNIIN	1204.65	6.3186	30	9	8.857	0.048	0.528	0.048	3	Medium	0.019
	Mel	MELB	240	250	LAYNIASNIIN	1204.65	6.2993	300	9	9	0.12	1.338	0.094	3	Medium	0.038
	Mel	MELB	240	250	LAYNIASNIIN	1204.65	6.2898	3000	9	9	0.141	1.562	0.112	3	Medium	0.045
	Mel	MELB	242	255	YNIASNIINGFAIY	1571.8	10.0304	0	12	0	0	0	n/a	1	High	0
	Mel	MELB	242	255	YNIASNIINGFAIY	1571.8	10.0547	30	12	11.818	0.058	0.486	0.009	3	High	0.004
	Mel	MELB	242	255	YNIASNIINGFAIY	1571.8	9.9969	300	12	12	0.237	1.971	0.144	3	Medium	0.058
	Mel	MELB	242	255	YNIASNIINGFAIY	1571.8	10.0114	3000	12	12	0.3	2.501	0.172	3	Medium	0.069
	Mel	MELB	244	255	IASNIINGFAIY	1294.69	8.4658	0	10	0	0	0	n/a	1	High	0
	Mel	MELB	244	255	IASNIINGFAIY	1294.69	8.4672	30	10	9.819	0.032	0.324	0.019	3	High	0.008
	Mel	MELB	244	255	IASNIINGFAIY	1294.69	8.4357	300	10	10	0.145	1.449	0.112	3	High	0.045
	Mel	MELB	244	255	IASNIINGFAIY	1294.69	8.4556	3000	10	10	0.177	1.773	0.093	3	High	0.037
	Mel	MELB	246	255	SNIINGFAIY	1110.57	8.0633	0	8	0	0	0	n/a	1	High	0
	Mel	MELB	246	255	SNIINGFAIY	1110.57	8.1434	30	8	7.819	0.019	0.241	0.01	3	Medium	0.004
	Mel	MELB	246	255	SNIINGFAIY	1110.57	8.1133	300	8	8	0.102	1.27	0.077	3	Medium	0.031
	Mel	MELB	246	255	SNIINGFAIY	1110.57	8.0922	3000	8	8	0.138	1.729	0.044	3	Medium	0.018
	Mel	MELB	252	255	FAIY	512.264	6.0176	0	2	0	0	0	n/a	1	High	0
	Mel	MELB	252	255	FAIY	512.264	6.0587	30	2	1.961	0.011	0.572	0.013	3	High	0.005
	Mel	MELB	252	255	FAIY	512.264	6.0079	300	2	2	0.035	1.742	0.031	3	High	0.013
	Mel	MELB	252	255	FAIY	512.264	6.0102	3000	2	2	0.048	2.422	0.04	3	High	0.016
	Mel	MELB	254	257	IYYF	604.29	7.604	0	2	0	0	0	n/a	1	Medium	0
	Mel	MELB	254	257	IYYF	604.29	7.6213	30	2	2	0	-0.003	0.028	3	Medium	0.011
	Mel	MELB	254	257	IYYF	604.29	7.5821	300	2	2	0.004	0.222	0.009	3	Medium	0.003
	Mel	MELB	254	257	IYYF	604.29	7.575	3000	2	2	0.015	0.751	0.018	3	Medium	0.007
	Mel	MELB	256	259	YFTY	592.253	5.5469	0	2	0	0	0	n/a	1	High	0
	Mel	MELB	256	259	YFTY	592.253	5.5374	30	2	2	0.008	0.402	0.005	3	High	0.002
	Mel	MELB	256	259	YFTY	592.253	5.5272	300	2	2	0.038	1.893	0.03	3	High	0.012
	Mel	MELB	256	259	YFTY	592.253	5.5439	3000	2	2	0.052	2.604	0.03	3	High	0.012
	Mel	MELB	258	262	TYVIG	551.295	3.706	0	3	0	0	0	n/a	1	Medium	0
	Mel	MELB	258	262	TYVIG	551.295	3.7022	30	3	2.891	0.081	2.691	0.065	3	Medium	0.026
	Mel	MELB	258	262	TYVIG	551.295	3.681	300	3	3	0.199	6.631	0.172	3	Medium	0.069
	Mel	MELB	258	262	TYVIG	551.295	3.6702	3000	3	3	0.273	9.098	0.2	3	Medium	0.081
	Mel	MELB	263	267	DADLF	579.254	6.2177	0	3	0	0	0	n/a	1	Medium	0
	Mel	MELB	263	267	DADLF	579.254	6.2681	30	3	2.956	0.078	2.611	0.019	3	Medium	0.008
	Mel	MELB	263	267	DADLF	579.254	6.1652	300	3	3	0.177	5.889	0.176	3	Medium	0.071
	Mel	MELB	263	267	DADLF	579.254	6.1993	3000	3	3	0.242	8.062	0.094	3	Medium	0.038
	Mel	MELB	263	270	DADLFPYY	1002.43	8.4277	0	5	0	0	0	n/a	1	High	0
	Mel	MELB	263	270	DADLFPYY	1002.43	8.4435	30	5	4.952	0.093	1.868	0.036	3	High	0.014
	Mel	MELB	263	270	DADLFPYY	1002.43	8.4283	300	5	5	0.229	4.586	0.236	3	High	0.095
	Mel	MELB	263	270	DADLFPYY	1002.43	8.4178	3000	5	5	0.313	6.266	0.174	3	High	0.07
	Mel	MELB	266	270	LFPYY	701.342	7.2937	0	2	0	0	0	n/a	1	High	0
	Mel	MELB	266	270	LFPYY	701.342	7.29	30	2	1.996	0.021	1.042	0.042	3	High	0.017
	Mel	MELB	266	270	LFPYY	701.342	7.2486	300	2	2	0.08	3.994	0.098	3	High	0.039
	Mel	MELB	266	270	LFPYY	701.342	7.2557	3000	2	2	0.092	4.605	0.11	3	Medium	0.044
	Mel	MELB	273	282	YAGAANLLTL	1005.55	7.8533	0	8	0	0	0	n/a	1	High	0
	Mel	MELB	273	282	YAGAANLLTL	1005.55	7.8889	30	8	7.946	0.16	2.003	0.056	3	High	0.022
	Mel	MELB	273	282	YAGAANLLTL	1005.55	7.8135	300	8	8	0.292	3.651	0.104	3	High	0.042
	Mel	MELB	273	282	YAGAANLLTL	1005.55	7.8046	3000	8	8	0.489	6.109	0.372	3	Medium	0.15
	Mel	MELB	274	282	AGAANLLTL	842.486	7.2455	0	7	0	0	0	n/a	1	High	0
	Mel	MELB	274	282	AGAANLLTL	842.486	7.2771	30	7	6.946	0.042	0.601	0.027	3	High	0.011
	Mel	MELB	274	282	AGAANLLTL	842.486	7.1984	300	7	7	0.119	1.693	0.125	3	High	0.05
	Mel	MELB	274	282	AGAANLLTL	842.486	7.2145	3000	7	7	0.22	3.145	0.208	3	High	0.084
	Mel	MELB	281	288	TLIVFPRL	957.601	8.0949	0	5	0	0	0	n/a	1	High	0
	Mel	MELB	281	288	TLIVFPRL	957.601	8.1115	30	5	4.747	0.154	3.088	0.034	3	High	0.014
	Mel	MELB	281	288	TLIVFPRL	957.601	8.0385	300	5	5	0.242	4.84	0.129	3	High	0.052
	Mel	MELB	281	288	TLIVFPRL	957.601	8.0325	3000	5	5	0.452	9.045	0.253	3	High	0.102
	Mel	MELB	283	288	IVFPRL	743.469	6.8928	0	3	0	0	0	n/a	1	High	0
	Mel	MELB	283	288	IVFPRL	743.469	6.8788	30	3	2.999	0.148	4.922	0.044	3	High	0.018
	Mel	MELB	283	288	IVFPRL	743.469	6.8374	300	3	3	0.216	7.19	0.113	3	Medium	0.045
	Mel	MELB	283	288	IVFPRL	743.469	6.8702	3000	3	3	0.418	13.946	0.23	3	Medium	0.092
	Mel	MELB	283	290	IVFPRLVK	970.633	4.3044	0	5	0	0	0	n/a	1	Medium	0
	Mel	MELB	283	290	IVFPRLVK	970.633	4.3303	30	5	4.887	0.249	4.99	0.079	3	Medium	0.032
	Mel	MELB	283	290	IVFPRLVK	970.633	4.2605	300	5	5	0.453	9.056	0.552	2	Medium	0.061
	Mel	MELB	283	290	IVFPRLVK	970.633	4.2762	3000	5	5	0.82	16.409	0.39	3	Medium	0.157
	Mel	MELB	289	292	VKML	489.298	3.0198	0	2	0	0	0	n/a	1	Medium	0
	Mel	MELB	289	292	VKML	489.298	2.9931	30	2	1.998	0.059	2.942	0.011	3	Medium	0.004
	Mel	MELB	289	292	VKML	489.298	2.9506	300	2	2	0.182	9.08	0.122	3	Medium	0.049
	Mel	MELB	289	292	VKML	489.298	2.9876	3000	2	2	0.393	19.629	0.241	3	Medium	0.097
	Mel	MELB	291	297	MLSRRIL	887.538	3.1844	0	5	0	0	0	n/a	1	Medium	0
	Mel	MELB	291	297	MLSRRIL	887.538	3.2106	30	5	4.935	0.556	11.123	0.099	3	Medium	0.04
	Mel	MELB	291	297	MLSRRIL	887.538	3.1201	300	5	5	0.792	15.846	0.269	3	Medium	0.108
	Mel	MELB	291	297	MLSRRIL	887.538	3.2015	3000	5	5	0.93	18.592	3.299	2	Medium	0.367
	Mel	MELB	292	297	LSRRIL	756.497	2.4047	0	4	0	0	0	n/a	1	High	0
	Mel	MELB	292	297	LSRRIL	756.497	2.4211	30	4	3.935	0.485	12.116	0.062	3	Medium	0.025
	Mel	MELB	292	297	LSRRIL	756.497	2.375	300	4	4	0.663	16.583	0.202	3	Medium	0.081
	Mel	MELB	292	297	LSRRIL	756.497	2.4141	3000	4	4	0.751	18.778	0.443	3	Medium	0.178
	Mel	MELB	295	301	RILWAGA	785.455	5.4832	0	5	0	0	0	n/a	1	Medium	0
	Mel	MELB	295	301	RILWAGA	785.455	5.5215	30	5	4.925	0.133	2.663	0.125	3	Medium	0.05
	Mel	MELB	295	301	RILWAGA	785.455	5.4796	300	5	5	0.133	2.67	0.137	3	Medium	0.055
	Mel	MELB	295	301	RILWAGA	785.455	5.4774	3000	5	5	0.185	3.691	0.105	3	Medium	0.042
	Mel	MELB	308	312	SCAGL	449.194	3.0092	0	3	0	0	0	n/a	1	High	0
	Mel	MELB	308	312	SCAGL	449.194	3.0249	30	3	2.999	0.015	0.504	0.007	3	High	0.003
	Mel	MELB	308	312	SCAGL	449.194	2.977	300	3	3	0.045	1.5	0.042	3	High	0.017
	Mel	MELB	308	312	SCAGL	449.194	2.9806	3000	3	3	0.082	2.748	0.076	3	High	0.031
	Mel	MELB	308	313	SCAGLF	596.263	6.6209	0	4	0	0	0	n/a	1	High	0
	Mel	MELB	308	313	SCAGLF	596.263	6.6132	30	4	3.997	0.024	0.602	0.089	3	High	0.036
	Mel	MELB	308	313	SCAGLF	596.263	6.5741	300	4	4	0.034	0.852	0.121	3	High	0.049
	Mel	MELB	308	313	SCAGLF	596.263	6.5663	3000	4	4	0.073	1.82	0.025	3	High	0.01
	Mel	MELB	316	321	ALADIH	638.339	2.2462	0	4	0	0	0	n/a	1	Medium	0
	Mel	MELB	316	321	ALADIH	638.339	2.2602	30	4	3.892	0.328	8.205	0.161	3	Medium	0.065
	Mel	MELB	316	321	ALADIH	638.339	2.2352	300	4	4	0.525	13.115	0.352	3	Medium	0.142
	Mel	MELB	316	321	ALADIH	638.339	2.2668	3000	4	4	0.755	18.87	0.708	3	Medium	0.285
	Mel	MELB	316	325	ALADIHNAAL	1007.54	4.2496	0	8	0	0	0	n/a	1	Medium	0
	Mel	MELB	316	325	ALADIHNAAL	1007.54	4.2672	30	8	7.883	0.258	3.22	0.03	3	Medium	0.012
	Mel	MELB	316	325	ALADIHNAAL	1007.54	4.2334	300	8	8	0.483	6.038	0.157	3	Medium	0.063
	Mel	MELB	316	325	ALADIHNAAL	1007.54	4.2132	3000	8	8	0.633	7.916	0.519	3	Medium	0.209
	Mel	MELB	317	323	LADIHNA	752.382	1.9659	0	5	0	0	0	n/a	1	High	0
	Mel	MELB	317	323	LADIHNA	752.382	1.9929	30	5	4.892	0.236	4.725	0.066	3	Medium	0.026
	Mel	MELB	317	323	LADIHNA	752.382	2.0039	300	5	5	0.391	7.81	0.176	3	Medium	0.071
	Mel	MELB	317	323	LADIHNA	752.382	2.0155	3000	5	5	0.399	7.983	0.326	3	Medium	0.131
	Mel	MELB	317	325	LADIHNAAL	936.503	3.6802	0	7	0	0	0	n/a	1	High	0
	Mel	MELB	317	325	LADIHNAAL	936.503	3.681	30	7	6.883	0.264	3.765	0.052	3	High	0.021
	Mel	MELB	317	325	LADIHNAAL	936.503	3.6475	300	7	7	0.504	7.203	0.251	3	High	0.101
	Mel	MELB	317	325	LADIHNAAL	936.503	3.6401	3000	7	7	0.603	8.614	0.418	3	Medium	0.168
	Mel	MELB	341	343	WVL	416.242	7.6579	0	1	0	0	0	n/a	1	Medium	0
	Mel	MELB	341	343	WVL	416.242	7.6407	30	1	0.968	0.007	0.689	0.012	3	Medium	0.005
	Mel	MELB	341	343	WVL	416.242	7.5759	300	1	1	-0.011	-1.084	0.006	3	Medium	0.002
	Mel	MELB	341	343	WVL	416.242	7.5784	3000	1	1	0.006	0.573	0.004	3	Medium	0.002
	Mel	MELB	348	358	VADTVDYGEFK	1242.58	4.3751	0	9	0	0	0	n/a	1	High	0
	Mel	MELB	348	358	VADTVDYGEFK	1242.58	4.3654	30	9	8.994	0.126	1.399	0.014	3	High	0.006
	Mel	MELB	348	358	VADTVDYGEFK	1242.58	4.3034	300	9	9	0.265	2.946	0.217	3	High	0.087
	Mel	MELB	348	358	VADTVDYGEFK	1242.58	4.3133	3000	9	9	0.303	3.362	0.364	3	High	0.146
	Mel	MELB	348	359	VADTVDYGEFKL	1355.66	6.9814	0	10	0	0	0	n/a	1	Medium	0
	Mel	MELB	348	359	VADTVDYGEFKL	1355.66	7.0134	30	10	9.992	0.083	0.826	0.057	3	Medium	0.023
	Mel	MELB	348	359	VADTVDYGEFKL	1355.66	6.9761	300	10	10	0.262	2.622	0.288	3	Medium	0.116
	Mel	MELB	348	359	VADTVDYGEFKL	1355.66	6.928	3000	10	10	0.237	2.37	0.345	3	Medium	0.139
	Mel	MELB	350	358	DTVDYGEFK	1072.47	4.1127	0	7	0	0	0	n/a	1	High	0
	Mel	MELB	350	358	DTVDYGEFK	1072.47	4.1124	30	7	6.994	0.09	1.28	0.001	3	High	0.001
	Mel	MELB	350	358	DTVDYGEFK	1072.47	4.0827	300	7	7	0.194	2.778	0.133	3	Medium	0.054
	Mel	MELB	350	358	DTVDYGEFK	1072.47	4.0897	3000	7	7	0.199	2.841	0.227	3	High	0.091
	Mel	MELB	363	367	CESIA	521.216	2.1353	0	3	0	0	0	n/a	1	High	0
	Mel	MELB	363	367	CESIA	521.216	2.1541	30	3	2.999	0.336	11.19	0.04	3	Medium	0.016
	Mel	MELB	363	367	CESIA	521.216	2.122	300	3	3	0.562	18.729	0.267	3	Medium	0.107
	Mel	MELB	363	367	CESIA	521.216	2.157	3000	3	3	0.897	29.885	0.374	3	Medium	0.15
	Mel	MELB	368	373	YSVQTM	727.321	3.6693	0	4	0	0	0	n/a	1	High	0
	Mel	MELB	368	373	YSVQTM	727.321	3.6983	30	4	3.999	0.1	2.512	0.048	3	High	0.02
	Mel	MELB	368	373	YSVQTM	727.321	3.6385	300	4	4	0.163	4.067	0.119	3	High	0.048
	Mel	MELB	368	373	YSVQTM	727.321	3.6613	3000	4	4	0.507	12.671	0.278	3	Medium	0.112
	Mel	MELB	372	383	TMVVKGGSAFAA	1137.59	3.6218	0	10	0	0	0	n/a	1	Medium	0
	Mel	MELB	372	383	TMVVKGGSAFAA	1137.59	3.6424	30	10	9.913	0.04	0.404	0.02	3	Medium	0.008
	Mel	MELB	372	383	TMVVKGGSAFAA	1137.59	3.5754	300	10	10	0.112	1.116	0.078	3	Medium	0.031
	Mel	MELB	372	383	TMVVKGGSAFAA	1137.59	3.5853	3000	10	10	0.11	1.098	0.141	3	Medium	0.057
	Mel	MELB	374	383	VVKGGSAFAA	905.497	2.5213	0	8	0	0	0	n/a	1	High	0
	Mel	MELB	374	383	VVKGGSAFAA	905.497	2.5377	30	8	8	0.053	0.66	0.004	3	High	0.001
	Mel	MELB	374	383	VVKGGSAFAA	905.497	2.5042	300	8	8	0.104	1.299	0.066	3	High	0.026
	Mel	MELB	374	383	VVKGGSAFAA	905.497	2.5404	3000	8	8	0.111	1.386	0.124	3	High	0.05
	Mel	MELB	377	383	GGSAFAA	579.265	2.956	0	5	0	0	0	n/a	1	Medium	0
	Mel	MELB	377	383	GGSAFAA	579.265	2.9665	30	5	5	0.043	0.851	0.065	3	Medium	0.026
	Mel	MELB	377	383	GGSAFAA	579.265	2.9188	300	5	5	0.042	0.85	0.033	3	Medium	0.013
	Mel	MELB	377	383	GGSAFAA	579.265	2.9451	3000	5	5	0.033	0.656	0.019	3	Medium	0.008
	Mel	MELB	381	385	FAAFF	601.29	8.9284	0	3	0	0	0	n/a	1	Medium	0
	Mel	MELB	381	385	FAAFF	601.29	8.8786	30	3	3	0.038	1.282	0.072	3	Medium	0.029
	Mel	MELB	381	385	FAAFF	601.29	8.8688	300	3	3	0.06	1.985	0.017	3	Medium	0.007
	Mel	MELB	381	385	FAAFF	601.29	8.8573	3000	3	3	0.066	2.198	0.05	3	Medium	0.02
	Mel	MELB	393	403	IGYTPNVAQSA	1119.56	3.4382	0	8	0	0	0	n/a	1	High	0
	Mel	MELB	393	403	IGYTPNVAQSA	1119.56	3.4667	30	8	7.999	0.488	6.094	0.16	3	Medium	0.064
	Mel	MELB	393	403	IGYTPNVAQSA	1119.56	3.4276	300	8	8	0.815	10.193	0.272	3	Medium	0.11
	Mel	MELB	393	403	IGYTPNVAQSA	1119.56	3.4237	3000	8	8	0.793	9.917	0.515	3	Medium	0.207
	Mel	MELB	393	404	IGYTPNVAQSAQ	1247.61	3.1155	0	9	0	0	0	n/a	1	High	0
	Mel	MELB	393	404	IGYTPNVAQSAQ	1247.61	3.1381	30	9	8.999	0.236	2.624	0.039	3	High	0.016
	Mel	MELB	393	404	IGYTPNVAQSAQ	1247.61	3.1025	300	9	9	0.335	3.725	0.248	3	High	0.1
	Mel	MELB	393	404	IGYTPNVAQSAQ	1247.61	3.1126	3000	9	9	0.281	3.123	0.252	3	High	0.102
	Mel	MELB	393	405	IGYTPNVAQSAQT	1348.66	3.1951	0	10	0	0	0	n/a	1	High	0
	Mel	MELB	393	405	IGYTPNVAQSAQT	1348.66	3.1983	30	10	9.999	0.269	2.688	0.047	3	High	0.019
	Mel	MELB	393	405	IGYTPNVAQSAQT	1348.66	3.1714	300	10	10	0.372	3.724	0.305	3	High	0.123
	Mel	MELB	393	405	IGYTPNVAQSAQT	1348.66	3.1875	3000	10	10	0.316	3.157	0.346	3	High	0.139
	Mel	MELB	405	413	TLQGMQFIM	1067.51	8.5247	0	7	0	0	0	n/a	1	Medium	0
	Mel	MELB	405	413	TLQGMQFIM	1067.51	8.4916	30	7	6.979	0.018	0.257	0.061	3	Medium	0.025
	Mel	MELB	405	413	TLQGMQFIM	1067.51	8.4084	300	7	7	0.078	1.115	0.222	3	Medium	0.089
	Mel	MELB	405	413	TLQGMQFIM	1067.51	8.432	3000	7	7	0.046	0.66	0.133	3	Medium	0.054
	Mel	MELB	407	411	QGMQF	609.258	5.2545	0	3	0	0	0	n/a	1	Medium	0
	Mel	MELB	407	411	QGMQF	609.258	5.2328	30	3	3	0.068	2.267	0.004	3	Medium	0.002
	Mel	MELB	407	411	QGMQF	609.258	5.2345	300	3	3	0.122	4.081	0.08	3	Medium	0.032
	Mel	MELB	407	411	QGMQF	609.258	5.2237	3000	3	3	0.113	3.778	0.099	3	Medium	0.04
	Mel	MELB	412	416	IMIVL	587.372	7.922	0	3	0	0	0	n/a	1	Medium	0
	Mel	MELB	412	416	IMIVL	587.372	7.9412	30	3	2.83	-0.024	-0.811	0.019	3	Medium	0.008
	Mel	MELB	412	416	IMIVL	587.372	7.8906	300	3	3	-0.039	-1.289	0.061	3	Medium	0.025
	Mel	MELB	412	416	IMIVL	587.372	7.9075	3000	3	3	-0.015	-0.486	0.1	3	Medium	0.04
	Mel	MELB	414	419	IVLPVL	652.452	7.8567	0	3	0	0	0	n/a	1	Medium	0
	Mel	MELB	414	419	IVLPVL	652.452	7.818	30	3	2.806	0.01	0.323	0.019	3	High	0.008
	Mel	MELB	414	419	IVLPVL	652.452	7.842	300	3	3	0.013	0.43	0.01	3	Medium	0.004
	Mel	MELB	414	419	IVLPVL	652.452	7.8308	3000	3	3	0.012	0.401	0.007	3	Medium	0.003
	Mel	MELB	420	422	FFM	443.188	7.0389	0	1	0	0	0	n/a	1	Medium	0
	Mel	MELB	420	422	FFM	443.188	7.0191	30	1	1	0.02	1.977	0.074	3	Medium	0.03
	Mel	MELB	420	422	FFM	443.188	6.9743	300	1	1	0.022	2.151	0.073	3	Medium	0.029
	Mel	MELB	420	422	FFM	443.188	6.9996	3000	1	1	0.037	3.745	0.005	3	Medium	0.002
	Mel	MELB	420	423	FFMM	574.228	8.6062	0	2	0	0	0	n/a	1	High	0
	Mel	MELB	420	423	FFMM	574.228	8.6067	30	2	2	-0.012	-0.584	0.002	3	High	0.001
	Mel	MELB	420	423	FFMM	574.228	8.5822	300	2	2	-0.006	-0.286	0.016	3	High	0.006
	Mel	MELB	420	423	FFMM	574.228	8.5496	3000	2	2	-0.003	-0.159	0.01	3	High	0.004
	Mel	MELB	420	424	FFMMT	675.276	7.6469	0	3	0	0	0	n/a	1	Medium	0
	Mel	MELB	420	424	FFMMT	675.276	7.6571	30	3	3	0.017	0.572	0.048	3	Medium	0.019
	Mel	MELB	420	424	FFMMT	675.276	7.6003	300	3	3	0.004	0.138	0.007	3	Medium	0.003
	Mel	MELB	420	424	FFMMT	675.276	7.5903	3000	3	3	-0.001	-0.031	0.017	3	Medium	0.007
	Mel	MELB	420	425	FFMMTL	788.36	10.152	0	4	0	0	0	n/a	1	Medium	0
	Mel	MELB	420	425	FFMMTL	788.36	10.1366	30	4	3.999	0.016	0.395	0.079	3	Medium	0.032
	Mel	MELB	420	425	FFMMTL	788.36	10.0678	300	4	4	0.024	0.59	0.042	3	Medium	0.017
	Mel	MELB	420	425	FFMMTL	788.36	10.0599	3000	4	4	0.009	0.226	0.036	3	Medium	0.014
	Mel	MELB	421	424	FMMT	528.208	4.4377	0	2	0	0	0	n/a	1	High	0
	Mel	MELB	421	424	FMMT	528.208	4.4462	30	2	2	0.069	3.451	0.018	3	High	0.007
	Mel	MELB	421	424	FMMT	528.208	4.3875	300	2	2	0.047	2.329	0.066	3	High	0.027
	Mel	MELB	421	424	FMMT	528.208	4.3765	3000	2	2	0.054	2.724	0.002	3	Medium	0.001
	Mel	MELB	422	425	MMTL	494.223	5.6855	0	2	0	0	0	n/a	1	Medium	0
	Mel	MELB	422	425	MMTL	494.223	5.6357	30	2	1.999	0.05	2.484	0.018	3	Medium	0.007
	Mel	MELB	422	425	MMTL	494.223	5.588	300	2	2	0.026	1.301	0.099	3	Medium	0.04
	Mel	MELB	422	425	MMTL	494.223	5.5904	3000	2	2	0.06	3.01	0.036	3	Medium	0.015
	Mel	MELB	426	430	VLYFR	696.396	4.7138	0	3	0	0	0	n/a	1	Medium	0
	Mel	MELB	426	430	VLYFR	696.396	4.7348	30	3	2.997	-0.008	-0.266	0.004	3	High	0.001
	Mel	MELB	426	430	VLYFR	696.396	4.6718	300	3	3	0.006	0.213	0.045	3	High	0.018
	Mel	MELB	426	430	VLYFR	696.396	4.6862	3000	3	3	-0.002	-0.077	0.003	3	High	0.001
	Mel	MELB	426	431	VLYFRY	859.459	6.3557	0	4	0	0	0	n/a	1	Medium	0
	Mel	MELB	426	431	VLYFRY	859.459	6.3763	30	4	3.997	0.034	0.843	0.016	3	Medium	0.006
	Mel	MELB	426	431	VLYFRY	859.459	6.3442	300	4	4	0.076	1.903	0.031	3	Medium	0.012
	Mel	MELB	426	431	VLYFRY	859.459	6.326	3000	4	4	0.048	1.196	0.023	3	Medium	0.009
	Mel	MELB	428	431	YFRY	647.307	4.1338	0	2	0	0	0	n/a	1	Medium	0
	Mel	MELB	428	431	YFRY	647.307	4.1424	30	2	2	0.017	0.873	0.021	3	Medium	0.008
	Mel	MELB	428	431	YFRY	647.307	4.088	300	2	2	0.036	1.789	0.017	3	Medium	0.007
	Mel	MELB	428	431	YFRY	647.307	4.0789	3000	2	2	0.013	0.63	0.026	3	Medium	0.011
	Mel	MELB	431	434	YYRL	613.322	4.1021	0	2	0	0	0	n/a	1	High	0
	Mel	MELB	431	434	YYRL	613.322	4.1229	30	2	2	0.055	2.735	0.01	3	High	0.004
	Mel	MELB	431	434	YYRL	613.322	4.0775	300	2	2	0.097	4.869	0.063	3	High	0.025
	Mel	MELB	431	434	YYRL	613.322	4.0789	3000	2	2	0.065	3.232	0.066	3	High	0.027
	Mel	MELB	438	443	MLRKIQ	787.474	1.74	0	4	0	0	0	n/a	1	Medium	0
	Mel	MELB	438	443	MLRKIQ	787.474	1.7444	30	4	3.988	0.224	5.608	0.05	3	Medium	0.02
	Mel	MELB	438	443	MLRKIQ	787.474	1.7431	300	4	4	0.501	12.531	0.303	3	Medium	0.122
	Mel	MELB	438	443	MLRKIQ	787.474	1.7948	3000	4	4	1.457	36.431	0.233	3	Medium	0.094
	Mel	MELB	440	447	RKIQIHLL	1019.66	4.2179	0	6	0	0	0	n/a	1	High	0
	Mel	MELB	440	447	RKIQIHLL	1019.66	4.2512	30	6	5.929	0.334	5.565	0.073	3	Medium	0.03
	Mel	MELB	440	447	RKIQIHLL	1019.66	4.1864	300	6	6	0.824	13.737	0.294	3	Medium	0.118
	Mel	MELB	440	447	RKIQIHLL	1019.66	4.194	3000	6	6	2.208	36.807	0.488	3	Medium	0.197
	Mel	MELB	442	447	IQIHLL	735.464	6.4598	0	4	0	0	0	n/a	1	Medium	0
	Mel	MELB	442	447	IQIHLL	735.464	6.4445	30	4	3.941	0.162	4.062	0.036	3	Medium	0.014
	Mel	MELB	442	447	IQIHLL	735.464	6.4011	300	4	4	0.46	11.494	0.358	3	Medium	0.144
	Mel	MELB	442	447	IQIHLL	735.464	6.3717	3000	4	4	1.413	35.334	0.442	3	Medium	0.178
	Mel	MELB	444	447	IHLL	494.322	4.8908	0	2	0	0	0	n/a	1	Medium	0
	Mel	MELB	444	447	IHLL	494.322	4.9088	30	2	1.946	0.096	4.775	0.018	3	Medium	0.007
	Mel	MELB	444	447	IHLL	494.322	4.8617	300	2	2	0.315	15.728	0.174	3	Medium	0.07
	Mel	MELB	444	447	IHLL	494.322	4.8437	3000	2	2	0.686	34.306	0.182	3	Medium	0.073
	Mel	MELB	448	466	DKYRKTPPFVEQPDSPAIS	2174.1	3.4503	0	13	0	0	0	n/a	1	Medium	0
	Mel	MELB	448	466	DKYRKTPPFVEQPDSPAIS	2174.1	3.3398	30	13	12.945	6.823	52.484	0.519	3	Medium	0.209
	Mel	MELB	448	466	DKYRKTPPFVEQPDSPAIS	2174.1	3.3533	300	13	13	6.809	52.381	0.394	3	Medium	0.159
	Mel	MELB	448	466	DKYRKTPPFVEQPDSPAIS	2174.1	3.312	3000	13	13	7.321	56.319	0.846	3	Medium	0.341
	Mel	MELB	448	467	DKYRKTPPFVEQPDSPAISV	2273.17	4.536	0	14	0	0	0	n/a	1	High	0
	Mel	MELB	448	467	DKYRKTPPFVEQPDSPAISV	2273.17	4.3952	30	14	13.944	8.059	57.561	0.491	3	High	0.198
	Mel	MELB	448	467	DKYRKTPPFVEQPDSPAISV	2273.17	4.4952	300	14	14	8.091	57.791	1.02	3	Medium	0.411
	Mel	MELB	448	467	DKYRKTPPFVEQPDSPAISV	2273.17	4.471	3000	14	14	8.584	61.313	0.28	3	Medium	0.113
	Mel	MELB	450	466	YRKTPPFVEQPDSPAIS	1930.98	3.6142	0	11	0	0	0	n/a	1	High	0
	Mel	MELB	450	466	YRKTPPFVEQPDSPAIS	1930.98	3.6355	30	11	10.945	0.37	6.696	60.873	0.307	3	0.123
	Mel	MELB	450	466	YRKTPPFVEQPDSPAIS	1930.98	3.5824	300	11	11	0.355	6.626	60.234	0.554	3	0.223
	Mel	MELB	450	466	YRKTPPFVEQPDSPAIS	1930.98	3.596	3000	11	11	0.301	6.709	60.991	0.151	3	0.061
	Mel	MELB	450	467	YRKTPPFVEQPDSPAISV	2030.05	4.7403	0	12	0	0
	Mel	MELB	450	467	YRKTPPFVEQPDSPAISV	2030.05	4.7596	30	12	11.944	0.464	7.58	63.166	0.473	3	0.19
	Mel	MELB	450	467	YRKTPPFVEQPDSPAISV	2030.05	4.6931	300	12	12	0.546	7.487	62.388	0.542	3	0.218
	Mel	MELB	450	467	YRKTPPFVEQPDSPAISV	2030.05	4.7148	3000	12	12	0.342	7.524	62.698	0.136	3	0.055
	Mel	MELB	450	468	YRKTPPFVEQPDSPAISVV	2129.12	5.1263	0	13	0	0
	Mel	MELB	450	468	YRKTPPFVEQPDSPAISVV	2129.12	5.0329	30	13	12.868	0.597	8.299	63.841	0.215	3	0.087
	Mel	MELB	450	468	YRKTPPFVEQPDSPAISVV	2129.12	5.0089	300	13	13	0.706	8.216	63.198	0.629	3	0.253
	Mel	MELB	450	468	YRKTPPFVEQPDSPAISVV	2129.12	4.9998	3000	13	13	0.447	8.288	63.757	0.312	2	0.035
	Mel	MELB	450	469	YRKTPPFVEQPDSPAISVVA	2200.15	4.8567	0	14	0	0	0	n/a	1	High	0
	Mel	MELB	450	469	YRKTPPFVEQPDSPAISVVA	2200.15	4.8378	30	14	13.868	8.595	61.396	0.47	3	High	0.189
	Mel	MELB	450	469	YRKTPPFVEQPDSPAISVVA	2200.15	4.787	300	14	14	8.651	61.791	0.98	3	Medium	0.394
	Mel	MELB	450	469	YRKTPPFVEQPDSPAISVVA	2200.15	4.8003	3000	14	14	8.666	61.902	0.254	3	High	0.102
Na and Mel	Mel_Na_mel	MELB	1	8	SISMTTKL	879.474	4.2284	0	6	0	0	0	n/a	1	High	0
	Mel_Na_mel	MELB	1	8	SISMTTKL	879.474	4.1789	30	6	5.998	1.794	29.893	0.057	3	Medium	0.023	0.000137896
	Mel_Na_mel	MELB	1	8	SISMTTKL	879.474	4.1633	300	6	6	1.907	31.776	0.242	3	Medium	0.098	0.00419141
	Mel_Na_mel	MELB	1	8	SISMTTKL	879.474	4.1745	3000	6	6	1.888	31.466	0.123	3	Medium	0.05	0.0035849
	Mel_Na_mel	MELB	1	9	SISMTTKLS	966.506	3.3167	0	7	0	0	0	n/a	1	High	0
	Mel_Na_mel	MELB	1	9	SISMTTKLS	966.506	3.2756	30	7	6.998	2.324	33.196	0.074	3	Medium	0.03	0.0906022
	Mel_Na_mel	MELB	1	9	SISMTTKLS	966.506	3.285	300	7	7	2.409	34.415	0.184	3	Medium	0.074	0.0372792
	Mel_Na_mel	MELB	1	9	SISMTTKLS	966.506	3.3024	3000	7	7	2.384	34.055	0.132	3	Medium	0.053	0.000227814
	Mel_Na_mel	MELB	6	14	TKLSYGFGA	942.481	4.7218	0	7	0	0	0	n/a	1	High	0
	Mel_Na_mel	MELB	6	14	TKLSYGFGA	942.481	4.6882	30	7	6.998	0.041	0.579	0.015	3	High	0.006	0.0127566
	Mel_Na_mel	MELB	6	14	TKLSYGFGA	942.481	4.6762	300	7	7	0.053	0.763	0.071	3	High	0.029	0.000457672
	Mel_Na_mel	MELB	6	14	TKLSYGFGA	942.481	4.6772	3000	7	7	0.098	1.395	0.179	3	Medium	0.072	0.0117078
	Mel_Na_mel	MELB	11	18	GFGAFGKD	797.371	4.3908	0	6	0	0	0	n/a	1	Medium	0
	Mel_Na_mel	MELB	11	18	GFGAFGKD	797.371	4.395	30	6	6	0.049	0.813	0.009	3	Medium	0.004	0.167715
	Mel_Na_mel	MELB	11	18	GFGAFGKD	797.371	4.3919	300	6	6	0.059	0.987	0.011	3	Medium	0.005	0.165837
	Mel_Na_mel	MELB	11	18	GFGAFGKD	797.371	4.396	3000	6	6	0.083	1.389	0.138	3	Medium	0.055	0.125457
	Mel_Na_mel	MELB	12	17	FGAFGK	625.322	3.5697	0	4	0	0	0	n/a	1	Medium	0
	Mel_Na_mel	MELB	12	17	FGAFGK	625.322	3.6084	30	4	4	0.161	4.036	0.036	3	Medium	0.015	0.399739
	Mel_Na_mel	MELB	12	17	FGAFGK	625.322	3.589	300	4	4	0.18	4.488	0.131	3	Medium	0.053	0.77245
	Mel_Na_mel	MELB	12	17	FGAFGK	625.322	3.6084	3000	4	4	0.176	4.408	0.071	3	Medium	0.029	0.177326
	Mel_Na_mel	MELB	12	18	FGAFGKD	740.349	3.8434	0	5	0	0	0	n/a	1	Medium	0
	Mel_Na_mel	MELB	12	18	FGAFGKD	740.349	3.8157	30	5	5	0.07	1.397	0.051	3	Medium	0.021	0.550623
	Mel_Na_mel	MELB	12	18	FGAFGKD	740.349	3.8059	300	5	5	0.093	1.851	0.017	3	Medium	0.007	0.0207905
	Mel_Na_mel	MELB	12	18	FGAFGKD	740.349	3.8122	3000	5	5	0.09	1.793	0.064	3	Medium	0.026	0.142628
	Mel_Na_mel	MELB	15	19	FGKDF	612.291	3.5799	0	3	0	0	0	n/a	1	High	0
	Mel_Na_mel	MELB	15	19	FGKDF	612.291	3.5627	30	3	2.999	0.057	1.9	0.071	3	Medium	0.028	0.612585
	Mel_Na_mel	MELB	15	19	FGKDF	612.291	3.5431	300	3	3	0.071	2.371	0.015	3	Medium	0.006	0.00377504
	Mel_Na_mel	MELB	15	19	FGKDF	612.291	3.5537	3000	3	3	0.131	4.367	0.155	3	Medium	0.062	0.0207248
	Mel_Na_mel	MELB	20	26	AIGIVYM	765.409	7.0083	0	5	0	0	0	n/a	1	Medium	0
	Mel_Na_mel	MELB	20	26	AIGIVYM	765.409	7.0055	30	5	4.868	0.28	5.604	0.303	3	Medium	0.122	0.0594183
	Mel_Na_mel	MELB	20	26	AIGIVYM	765.409	6.9872	300	5	5	0.139	2.777	0.178	3	Medium	0.072	0.0164102
	Mel_Na_mel	MELB	20	26	AIGIVYM	765.409	6.9726	3000	5	5	0.116	2.324	0.066	3	Medium	0.027	0.0809622
	Mel_Na_mel	MELB	23	25	IVY	393.226	3.2056	0	1	0	0	0	n/a	1	Medium	0
	Mel_Na_mel	MELB	23	25	IVY	393.226	3.1762	30	1	0.999	0.033	3.267	0.016	3	Medium	0.006	0.00579898
	Mel_Na_mel	MELB	23	25	IVY	393.226	3.1785	300	1	1	0.013	1.275	0.02	3	Medium	0.008	0.0472634
	Mel_Na_mel	MELB	23	25	IVY	393.226	3.1705	3000	1	1	0.011	1.07	0.004	3	Medium	0.002	0.0202587
	Mel_Na_mel	MELB	23	28	IVYMYL	800.414	8.4439	0	4	0	0	0	n/a	1	High	0
	Mel_Na_mel	MELB	23	28	IVYMYL	800.414	8.442	30	4	3.994	0.061	1.531	0.041	3	High	0.017	0.0172357
	Mel_Na_mel	MELB	23	28	IVYMYL	800.414	8.4232	300	4	4	0.031	0.769	0.01	3	High	0.004	0.0701016
	Mel_Na_mel	MELB	23	28	IVYMYL	800.414	8.4336	3000	4	4	0.029	0.728	0.002	3	High	0.001	0.18877
	Mel_Na_mel	MELB	26	28	MYL	425.198	5.5581	0	1	0	0	0	n/a	1	High	0
	Mel_Na_mel	MELB	26	28	MYL	425.198	5.4891	30	1	0.995	0.006	0.576	0.009	3	High	0.004	0.845621
	Mel_Na_mel	MELB	26	28	MYL	425.198	5.4679	300	1	1	0.007	0.709	0.007	3	Medium	0.003	0.0376195
	Mel_Na_mel	MELB	26	28	MYL	425.198	5.4832	3000	1	1	0.003	0.305	0.018	3	Medium	0.007	0.840846
	Mel_Na_mel	MELB	29	31	MYY	475.178	4.2235	0	1	0	0	0	n/a	1	Medium	0
	Mel_Na_mel	MELB	29	31	MYY	475.178	4.125	30	1	1	0.007	0.668	0.061	3	Medium	0.024	0.64132
	Mel_Na_mel	MELB	29	31	MYY	475.178	4.0998	300	1	1	0.008	0.83	0.068	3	Medium	0.027	0.777229
	Mel_Na_mel	MELB	29	31	MYY	475.178	4.1212	3000	1	1	0.043	4.331	0.081	3	Medium	0.033	0.959172
	Mel_Na_mel	MELB	29	34	MYYYTD	854.316	4.5688	0	4	0	0	0	n/a	1	High	0
	Mel_Na_mel	MELB	29	34	MYYYTD	854.316	4.529	30	4	4	0.055	1.384	0.023	3	High	0.009	0.0710481
	Mel_Na_mel	MELB	29	34	MYYYTD	854.316	4.5278	300	4	4	0.048	1.194	0.013	3	High	0.005	0.00373518
	Mel_Na_mel	MELB	29	34	MYYYTD	854.316	4.5424	3000	4	4	0.053	1.317	0.015	3	High	0.006	0.338225
	Mel_Na_mel	MELB	35	46	VVGLSVGLVGTL	1112.68	8.2186	0	10	0	0	0	n/a	1	Medium	0
	Mel_Na_mel	MELB	35	46	VVGLSVGLVGTL	1112.68	8.1179	30	10	9.885	0.68	6.798	0.029	3	Medium	0.012	0.0026125
	Mel_Na_mel	MELB	35	46	VVGLSVGLVGTL	1112.68	8.1609	300	10	10	0.651	6.509	0.111	3	Medium	0.045	0.95967
	Mel_Na_mel	MELB	35	46	VVGLSVGLVGTL	1112.68	8.2031	3000	10	10	0.45	4.496	0.394	3	Medium	0.159	0.140866
	Mel_Na_mel	MELB	42	46	LVGTL	501.316	3.9808	0	3	0	0	0	n/a	1	Medium	0
	Mel_Na_mel	MELB	42	46	LVGTL	501.316	3.9228	30	3	2.999	0.016	0.55	0.015	3	Medium	0.006	0.165145
	Mel_Na_mel	MELB	42	46	LVGTL	501.316	3.9565	300	3	3	0.018	0.586	0.005	3	Medium	0.002	0.29092
	Mel_Na_mel	MELB	42	46	LVGTL	501.316	3.9281	3000	3	3	0.01	0.317	0.011	3	Medium	0.004	0.0744162
	Mel_Na_mel	MELB	45	48	TLFL	492.295	7.4907	0	2	0	0	0	n/a	1	Medium	0
	Mel_Na_mel	MELB	45	48	TLFL	492.295	7.4761	30	2	1.994	0.011	0.574	0.023	3	Medium	0.009	0.483179
	Mel_Na_mel	MELB	45	48	TLFL	492.295	7.4659	300	2	2	0.009	0.46	0.023	3	Medium	0.009	0.877603
	Mel_Na_mel	MELB	45	48	TLFL	492.295	7.4779	3000	2	2	0.008	0.377	0.017	3	Medium	0.007	0.557175
	Mel_Na_mel	MELB	47	51	FLVAR	604.37	2.6827	0	3	0	0	0	n/a	1	Medium	0
	Mel_Na_mel	MELB	47	51	FLVAR	604.37	2.6792	30	3	2.888	0.014	0.466	0.022	3	High	0.009	0.579934
	Mel_Na_mel	MELB	47	51	FLVAR	604.37	2.6771	300	3	3	0.015	0.489	0.015	3	High	0.006	0.165655
	Mel_Na_mel	MELB	47	51	FLVAR	604.37	2.7176	3000	3	3	0.012	0.407	0.009	3	High	0.004	0.538168
	Mel_Na_mel	MELB	47	53	FLVARIW	903.533	7.7147	0	5	0	0	0	n/a	1	High	0
	Mel_Na_mel	MELB	47	53	FLVARIW	903.533	7.6483	30	5	4.867	0.036	0.716	0.012	3	High	0.005	0.0247348
	Mel_Na_mel	MELB	47	53	FLVARIW	903.533	7.6443	300	5	5	0.031	0.624	0.007	3	High	0.003	0.738838
	Mel_Na_mel	MELB	47	53	FLVARIW	903.533	7.6548	3000	5	5	0.029	0.578	0.018	3	High	0.007	0.966746
	Mel_Na_mel	MELB	48	53	LVARIW	756.465	5.7224	0	4	0	0	0	n/a	1	High	0
	Mel_Na_mel	MELB	48	53	LVARIW	756.465	5.7074	30	4	3.979	0.026	0.653	0.006	3	Medium	0.002	0.136758
	Mel_Na_mel	MELB	48	53	LVARIW	756.465	5.739	300	4	4	0.021	0.52	0.037	3	Medium	0.015	0.909811
	Mel_Na_mel	MELB	48	53	LVARIW	756.465	5.7023	3000	4	4	0.015	0.373	0.018	3	Medium	0.007	0.974551
	Mel_Na_mel	MELB	49	53	VARIW	643.381	4.7377	0	3	0	0	0	n/a	1	High	0
	Mel_Na_mel	MELB	49	53	VARIW	643.381	4.6971	30	3	2.979	0.029	0.98	0.011	3	High	0.004	0.142817
	Mel_Na_mel	MELB	49	53	VARIW	643.381	4.6939	300	3	3	0.031	1.037	0.004	3	High	0.002	0.0181851
	Mel_Na_mel	MELB	49	53	VARIW	643.381	4.67	3000	3	3	0.022	0.722	0.015	3	High	0.006	0.542002
	Mel_Na_mel	MELB	52	61	IWDAINDPIM	1186.57	8.1592	0	7	0	0	0	n/a	1	High	0
	Mel_Na_mel	MELB	52	61	IWDAINDPIM	1186.57	8.1338	30	7	6.817	0.062	0.879	0.026	3	High	0.01	0.11273
	Mel_Na_mel	MELB	52	61	IWDAINDPIM	1186.57	8.1319	300	7	7	0.054	0.769	0.019	3	High	0.008	0.040442
	Mel_Na_mel	MELB	52	61	IWDAINDPIM	1186.57	8.1245	3000	7	7	0.045	0.643	0.014	3	High	0.006	0.208268
	Mel_Na_mel	MELB	52	66	IWDAINDPIMGWIVN	1755.87	10.943	0	12	0	0	0	n/a	1	High	0
	Mel_Na_mel	MELB	52	66	IWDAINDPIMGWIVN	1755.87	10.8948	30	12	11.617	0.118	0.986	0.029	3	High	0.012	0.0137225
	Mel_Na_mel	MELB	52	66	IWDAINDPIMGWIVN	1755.87	10.8937	300	12	12	0.102	0.849	0.022	3	High	0.009	0.109834
	Mel_Na_mel	MELB	52	66	IWDAINDPIMGWIVN	1755.87	10.8806	3000	12	12	0.081	0.673	0.079	3	Medium	0.032	0.120615
	Mel_Na_mel	MELB	54	65	DAINDPIMGWIV	1342.66	10.5697	0	9	0	0	0	n/a	1	High	0
	Mel_Na_mel	MELB	54	65	DAINDPIMGWIV	1342.66	10.5292	30	9	8.617	0.086	0.958	0.012	3	High	0.005	0.0494526
	Mel_Na_mel	MELB	54	65	DAINDPIMGWIV	1342.66	10.5326	300	9	9	0.077	0.853	0.024	3	High	0.01	0.072087
	Mel_Na_mel	MELB	54	65	DAINDPIMGWIV	1342.66	10.5433	3000	9	9	0.047	0.521	0.03	3	High	0.012	0.165709
	Mel_Na_mel	MELB	58	65	DPIMGWIV	929.468	9.8469	0	6	0	0	0	n/a	1	High	0
	Mel_Na_mel	MELB	58	65	DPIMGWIV	929.468	9.8251	30	6	5.653	0.062	1.027	0.063	3	High	0.025	0.230664
	Mel_Na_mel	MELB	58	65	DPIMGWIV	929.468	9.787	300	6	6	0.058	0.959	0.031	3	High	0.013	0.685927
	Mel_Na_mel	MELB	58	65	DPIMGWIV	929.468	9.7976	3000	6	6	0.034	0.567	0.03	3	High	0.012	0.386746
	Mel_Na_mel	MELB	67	76	ATRSRWGKFK	1235.69	1.782	0	8	0	0	0	n/a	1	Medium	0
	Mel_Na_mel	MELB	67	76	ATRSRWGKFK	1235.69	1.8048	30	8	8	0.132	1.645	0.099	3	Medium	0.04	0.281291
	Mel_Na_mel	MELB	67	76	ATRSRWGKFK	1235.69	1.7913	300	8	8	0.195	2.44	0.179	3	Medium	0.072	0.086485
	Mel_Na_mel	MELB	67	76	ATRSRWGKFK	1235.69	1.9155	3000	8	8	0.232	2.901	0.121	3	Medium	0.049	0.115036
	Mel_Na_mel	MELB	70	76	SRWGKFK	907.503	2.2042	0	5	0	0	0	n/a	1	Medium	0
	Mel_Na_mel	MELB	70	76	SRWGKFK	907.503	2.2245	30	5	5	0.038	0.767	0.039	3	Medium	0.016	0.0244743
	Mel_Na_mel	MELB	70	76	SRWGKFK	907.503	2.2073	300	5	5	0.071	1.424	0.067	3	Medium	0.027	0.428433
	Mel_Na_mel	MELB	70	76	SRWGKFK	907.503	2.3736	3000	5	5	0.09	1.795	0.096	3	Medium	0.039	0.397289
	Mel_Na_mel	MELB	72	76	WGKFK	664.37	2.7275	0	3	0	0	0	n/a	1	Medium	0
	Mel_Na_mel	MELB	72	76	WGKFK	664.37	2.6968	30	3	3	0.044	1.461	0.037	3	Medium	0.015	0.159988
	Mel_Na_mel	MELB	72	76	WGKFK	664.37	2.6931	300	3	3	0.07	2.349	0.062	3	Medium	0.025	0.0114984
	Mel_Na_mel	MELB	72	76	WGKFK	664.37	2.7193	3000	3	3	0.122	4.069	0.175	3	Medium	0.07	0.150985
	Mel_Na_mel	MELB	75	80	FKPWIL	802.474	8.3898	0	3	0	0	0	n/a	1	High	0
	Mel_Na_mel	MELB	75	80	FKPWIL	802.474	8.3667	30	3	2.845	0.036	1.194	0.034	3	High	0.013	0.384842
	Mel_Na_mel	MELB	75	80	FKPWIL	802.474	8.3483	300	3	3	0.022	0.73	0.021	3	High	0.008	0.0786846
	Mel_Na_mel	MELB	75	80	FKPWIL	802.474	8.3189	3000	3	3	0.058	1.95	0.046	3	High	0.019	0.128249
	Mel_Na_mel	MELB	81	88	IGTLTNSL	817.455	5.0497	0	6	0	0	0	n/a	1	Medium	0
	Mel_Na_mel	MELB	81	88	IGTLTNSL	817.455	4.9949	30	6	5.999	0.051	0.855	0.016	3	High	0.006	0.0382516
	Mel_Na_mel	MELB	81	88	IGTLTNSL	817.455	5.0115	300	6	6	0.039	0.657	0.01	3	High	0.004	0.0886306
	Mel_Na_mel	MELB	81	88	IGTLTNSL	817.455	5.0047	3000	6	6	0.046	0.773	0.013	3	High	0.005	0.193767
	Mel_Na_mel	MELB	81	90	IGTLTNSLVL	1029.61	7.267	0	8	0	0	0	n/a	1	Medium	0
	Mel_Na_mel	MELB	81	90	IGTLTNSLVL	1029.61	7.2912	30	8	7.855	0.044	0.555	0.011	3	Medium	0.004	0.00909943
	Mel_Na_mel	MELB	81	90	IGTLTNSLVL	1029.61	7.2927	300	8	8	0.037	0.467	0.015	3	Medium	0.006	0.136385
	Mel_Na_mel	MELB	81	90	IGTLTNSLVL	1029.61	7.26	3000	8	8	0.028	0.354	0.014	3	Medium	0.006	0.133423
	Mel_Na_mel	MELB	92	98	LLFSAHL	799.459	6.7833	0	5	0	0	0	n/a	1	Medium	0
	Mel_Na_mel	MELB	92	98	LLFSAHL	799.459	6.743	30	5	4.998	0.03	0.604	0.03	3	Medium	0.012	0.453043
	Mel_Na_mel	MELB	92	98	LLFSAHL	799.459	6.7405	300	5	5	0.026	0.516	0.065	3	Medium	0.026	0.383027
	Mel_Na_mel	MELB	92	98	LLFSAHL	799.459	6.7261	3000	5	5	0.022	0.44	0.046	2	Medium	0.005	0.487643
	Mel_Na_mel	MELB	93	99	LFSAHLF	833.444	7.2355	0	5	0	0	0	n/a	1	Medium	0
	Mel_Na_mel	MELB	93	99	LFSAHLF	833.444	7.193	30	5	4.998	0.037	0.736	0.028	3	Medium	0.011	0.064621
	Mel_Na_mel	MELB	93	99	LFSAHLF	833.444	7.1798	300	5	5	0.032	0.637	0.038	3	Medium	0.015	0.0280781
	Mel_Na_mel	MELB	93	99	LFSAHLF	833.444	7.1799	3000	5	5	0.03	0.604	0.044	3	Medium	0.018	0.812489
	Mel_Na_mel	MELB	94	99	FSAHLF	720.36	6.1753	0	4	0	0	0	n/a	1	High	0
	Mel_Na_mel	MELB	94	99	FSAHLF	720.36	6.114	30	4	3.998	0.045	1.128	0.005	3	Medium	0.002	0.0150872
	Mel_Na_mel	MELB	94	99	FSAHLF	720.36	6.1231	300	4	4	0.04	1.003	0.003	3	High	0.001	0.078051
	Mel_Na_mel	MELB	94	99	FSAHLF	720.36	6.1035	3000	4	4	0.035	0.88	0.011	3	Medium	0.004	0.182018
	Mel_Na_mel	MELB	98	106	LFEGTAQVV	962.507	5.118	0	7	0	0	0	n/a	1	Medium	0
	Mel_Na_mel	MELB	98	106	LFEGTAQVV	962.507	5.1383	30	7	6.92	0.141	2.02	0.021	3	Medium	0.008	0.0420917
	Mel_Na_mel	MELB	98	106	LFEGTAQVV	962.507	5.1124	300	7	7	0.167	2.384	0.032	3	Medium	0.013	0.0912503
	Mel_Na_mel	MELB	98	106	LFEGTAQVV	962.507	5.1217	3000	7	7	0.111	1.585	0.22	3	Medium	0.089	0.458956
	Mel_Na_mel	MELB	100	106	EGTAQVV	702.355	2.2568	0	5	0	0	0	n/a	1	Medium	0
	Mel_Na_mel	MELB	100	106	EGTAQVV	702.355	2.2509	30	5	4.92	0.112	2.238	0.034	3	Medium	0.014	0.0620583
	Mel_Na_mel	MELB	100	106	EGTAQVV	702.355	2.2496	300	5	5	0.113	2.265	0.105	3	Medium	0.042	0.693909
	Mel_Na_mel	MELB	100	106	EGTAQVV	702.355	2.2816	3000	5	5	0.074	1.473	0.196	3	Medium	0.079	0.268606
	Mel_Na_mel	MELB	100	109	EGTAQVVFVC	1051.5	6.4519	0	8	0	0	0	n/a	1	High	0
	Mel_Na_mel	MELB	100	109	EGTAQVVFVC	1051.5	6.379	30	8	7.903	0.095	1.192	0.06	3	High	0.024	0.0137547
	Mel_Na_mel	MELB	100	109	EGTAQVVFVC	1051.5	6.3943	300	8	8	0.074	0.923	0.066	3	High	0.026	0.117596
	Mel_Na_mel	MELB	100	109	EGTAQVVFVC	1051.5	6.4201	3000	8	8	0.098	1.23	0.199	3	Medium	0.08	0.758991
	Mel_Na_mel	MELB	119	122	YTIM	526.246	4.8279	0	2	0	0	0	n/a	1	High	0
	Mel_Na_mel	MELB	119	122	YTIM	526.246	4.7949	30	2	1.995	0.031	1.533	0.011	3	High	0.004	0.0169136
	Mel_Na_mel	MELB	119	122	YTIM	526.246	4.7822	300	2	2	0.025	1.242	0.009	3	High	0.004	0.0411474
	Mel_Na_mel	MELB	119	122	YTIM	526.246	4.7872	3000	2	2	0.018	0.889	0.009	3	High	0.004	0.234034
	Mel_Na_mel	MELB	120	129	TIMDIPFWSL	1221.61	11.5535	0	7	0	0	0	n/a	1	High	0
	Mel_Na_mel	MELB	120	129	TIMDIPFWSL	1221.61	11.5203	30	7	6.889	0.066	0.949	0.019	3	High	0.008	0.0196765
	Mel_Na_mel	MELB	120	129	TIMDIPFWSL	1221.61	11.5079	300	7	7	0.066	0.942	0.012	3	High	0.005	0.0505373
	Mel_Na_mel	MELB	120	129	TIMDIPFWSL	1221.61	11.5018	3000	7	7	0.057	0.807	0.029	3	High	0.012	0.280691
	Mel_Na_mel	MELB	123	129	DIPFWSL	876.438	10.3845	0	4	0	0	0	n/a	1	Medium	0
	Mel_Na_mel	MELB	123	129	DIPFWSL	876.438	10.4206	30	4	3.997	0.036	0.91	0.012	3	Medium	0.005	0.0394856
	Mel_Na_mel	MELB	123	129	DIPFWSL	876.438	10.3876	300	4	4	0.03	0.761	0.009	3	Medium	0.004	0.0515264
	Mel_Na_mel	MELB	123	129	DIPFWSL	876.438	10.3679	3000	4	4	0.016	0.401	0.009	3	Medium	0.004	0.176508
	Mel_Na_mel	MELB	124	129	IPFWSL	761.411	10.0469	0	4	0	0	0	n/a	1	High	0
	Mel_Na_mel	MELB	124	129	IPFWSL	761.411	10.008	30	4	3.997	0.051	1.276	0.017	3	High	0.007	0.0144903
	Mel_Na_mel	MELB	124	129	IPFWSL	761.411	9.9831	300	4	4	0.038	0.949	0.006	3	High	0.002	0.0622541
	Mel_Na_mel	MELB	124	129	IPFWSL	761.411	9.9514	3000	4	4	0.021	0.537	0.015	3	High	0.006	0.247837
	Mel_Na_mel	MELB	130	135	VPTITL	642.395	6.0491	0	4	0	0	0	n/a	1	Medium	0
	Mel_Na_mel	MELB	130	135	VPTITL	642.395	6.0117	30	4	3.994	0.048	1.193	0.02	3	Medium	0.008	0.970349
	Mel_Na_mel	MELB	130	135	VPTITL	642.395	5.968	300	4	4	0.052	1.288	0.039	3	Medium	0.016	0.47987
	Mel_Na_mel	MELB	130	135	VPTITL	642.395	5.9932	3000	4	4	0.06	1.502	0.008	3	Medium	0.003	0.24642
	Mel_Na_mel	MELB	130	137	VPTITLDK	885.517	3.6374	0	6	0	0	0	n/a	1	Medium	0
	Mel_Na_mel	MELB	130	137	VPTITLDK	885.517	3.5554	30	6	5.994	0.103	1.709	0.101	3	Medium	0.041	0.0252396
	Mel_Na_mel	MELB	130	137	VPTITLDK	885.517	3.5534	300	6	6	0.194	3.227	0.12	3	Medium	0.048	0.0302452
	Mel_Na_mel	MELB	130	137	VPTITLDK	885.517	3.5555	3000	6	6	0.258	4.297	0.198	3	Medium	0.08	0.199534
	Mel_Na_mel	MELB	136	149	DKREREQLVPFPRF	1815.97	5.9509	0	10	0	0	0	n/a	1	High	0
	Mel_Na_mel	MELB	136	149	DKREREQLVPFPRF	1815.97	5.8313	30	10	9.885	0.267	2.668	0.06	3	High	0.024	0.00667467
	Mel_Na_mel	MELB	136	149	DKREREQLVPFPRF	1815.97	5.8148	300	10	10	0.288	2.882	0.199	3	High	0.08	0.00266766
	Mel_Na_mel	MELB	136	149	DKREREQLVPFPRF	1815.97	5.8029	3000	10	10	0.575	5.753	0.298	3	High	0.12	0.0337806
	Mel_Na_mel	MELB	138	149	REREQLVPFPRF	1572.85	6.1247	0	8	0	0	0	n/a	1	High	0
	Mel_Na_mel	MELB	138	149	REREQLVPFPRF	1572.85	6.0685	30	8	7.885	0.138	1.724	0.015	3	High	0.006	0.00405437
	Mel_Na_mel	MELB	138	149	REREQLVPFPRF	1572.85	6.0281	300	8	8	0.155	1.943	0.115	3	High	0.046	0.00777871
	Mel_Na_mel	MELB	138	149	REREQLVPFPRF	1572.85	6.0343	3000	8	8	0.272	3.394	0.225	3	High	0.091	0.0352021
	Mel_Na_mel	MELB	139	149	EREQLVPFPRF	1416.75	6.9006	0	7	0	0	0	n/a	1	Medium	0
	Mel_Na_mel	MELB	139	149	EREQLVPFPRF	1416.75	6.869	30	7	6.885	0.143	2.039	0.045	3	Medium	0.018	0.000346991
	Mel_Na_mel	MELB	139	149	EREQLVPFPRF	1416.75	6.7927	300	7	7	0.182	2.6	0.12	3	Medium	0.048	0.00219786
	Mel_Na_mel	MELB	139	149	EREQLVPFPRF	1416.75	6.773	3000	7	7	0.321	4.59	0.263	3	Medium	0.106	0.0198214
	Mel_Na_mel	MELB	139	150	EREQLVPFPRFF	1563.82	8.3578	0	8	0	0	0	n/a	1	Medium	0
	Mel_Na_mel	MELB	139	150	EREQLVPFPRFF	1563.82	8.3237	30	8	7.885	0.135	1.694	0.082	3	Medium	0.033	0.00479533
	Mel_Na_mel	MELB	139	150	EREQLVPFPRFF	1563.82	8.3244	300	8	8	0.173	2.16	0.163	3	Medium	0.066	0.00146246
	Mel_Na_mel	MELB	139	150	EREQLVPFPRFF	1563.82	8.3408	3000	8	8	0.326	4.078	0.275	3	Medium	0.111	0.00264442
	Mel_Na_mel	MELB	140	149	REQLVPFPRF	1287.71	6.8223	0	6	0	0	0	n/a	1	High	0
	Mel_Na_mel	MELB	140	149	REQLVPFPRF	1287.71	6.7646	30	6	5.885	0.07	1.159	0.064	3	High	0.026	0.0193847
	Mel_Na_mel	MELB	140	149	REQLVPFPRF	1287.71	6.7581	300	6	6	0.103	1.724	0.078	3	Medium	0.031	0.0100133
	Mel_Na_mel	MELB	140	149	REQLVPFPRF	1287.71	6.7379	3000	6	6	0.18	2.994	0.162	3	Medium	0.065	0.00426898
	Mel_Na_mel	MELB	141	149	EQLVPFPRF	1131.61	7.752	0	5	0	0	0	n/a	1	Medium	0
	Mel_Na_mel	MELB	141	149	EQLVPFPRF	1131.61	7.6947	30	5	4.885	0.105	2.101	0.03	3	Medium	0.012	0.00136918
	Mel_Na_mel	MELB	141	149	EQLVPFPRF	1131.61	7.6822	300	5	5	0.125	2.491	0.084	3	Medium	0.034	0.00461119
	Mel_Na_mel	MELB	141	149	EQLVPFPRF	1131.61	7.6595	3000	5	5	0.191	3.813	0.207	3	Medium	0.083	0.00819553
	Mel_Na_mel	MELB	141	150	EQLVPFPRFF	1278.68	9.3429	0	6	0	0	0	n/a	1	High	0
	Mel_Na_mel	MELB	141	150	EQLVPFPRFF	1278.68	9.2854	30	6	5.885	0.104	1.737	0.025	3	Medium	0.01	0.00719712
	Mel_Na_mel	MELB	141	150	EQLVPFPRFF	1278.68	9.2139	300	6	6	0.123	2.043	0.06	3	Medium	0.024	0.00651478
	Mel_Na_mel	MELB	141	150	EQLVPFPRFF	1278.68	9.2782	3000	6	6	0.199	3.311	0.21	3	Medium	0.085	0.0075921
	Mel_Na_mel	MELB	142	149	QLVPFPRF	1002.57	7.6458	0	4	0	0	0	n/a	1	High	0
	Mel_Na_mel	MELB	142	149	QLVPFPRF	1002.57	7.6161	30	4	3.885	0.065	1.616	0.032	3	High	0.013	0.00246065
	Mel_Na_mel	MELB	142	149	QLVPFPRF	1002.57	7.6221	300	4	4	0.065	1.622	0.029	3	High	0.012	0.025179
	Mel_Na_mel	MELB	142	149	QLVPFPRF	1002.57	7.5991	3000	4	4	0.101	2.525	0.146	3	High	0.059	0.0228148
	Mel_Na_mel	MELB	143	149	LVPFPRF	874.506	7.4483	0	3	0	0	0	n/a	1	Medium	0
	Mel_Na_mel	MELB	143	149	LVPFPRF	874.506	7.4008	30	3	2.997	0.043	1.42	0.013	3	Medium	0.005	0.000181962
	Mel_Na_mel	MELB	143	149	LVPFPRF	874.506	7.3962	300	3	3	0.055	1.843	0.064	3	Medium	0.026	0.0181874
	Mel_Na_mel	MELB	143	149	LVPFPRF	874.506	7.3447	3000	3	3	0.087	2.89	0.126	3	Medium	0.051	0.00390957
	Mel_Na_mel	MELB	150	155	FASLAG	564.291	3.6697	0	4	0	0	0	n/a	1	Medium	0
	Mel_Na_mel	MELB	150	155	FASLAG	564.291	3.6283	30	4	4	0.087	2.173	0.129	3	Medium	0.052	0.0422362
	Mel_Na_mel	MELB	150	155	FASLAG	564.291	3.6557	300	4	4	0.099	2.469	0.122	3	Medium	0.049	0.225495
	Mel_Na_mel	MELB	150	155	FASLAG	564.291	3.672	3000	4	4	0.214	5.358	0.102	3	Medium	0.041	0.00239121
	Mel_Na_mel	MELB	153	158	LAGFVT	606.338	5.0443	0	4	0	0	0	n/a	1	Medium	0
	Mel_Na_mel	MELB	153	158	LAGFVT	606.338	4.9454	30	4	3.983	0.086	2.156	0.029	3	Medium	0.012	0.0262701
	Mel_Na_mel	MELB	153	158	LAGFVT	606.338	4.9642	300	4	4	0.097	2.433	0.036	3	Medium	0.014	0.0113773
	Mel_Na_mel	MELB	153	158	LAGFVT	606.338	4.9656	3000	4	4	0.187	4.676	0.159	3	Medium	0.064	0.00313536
	Mel_Na_mel	MELB	154	168	AGFVTAGITLPFVSY	1541.81	9.8362	0	12	0	0	0	n/a	1	High	0
	Mel_Na_mel	MELB	154	168	AGFVTAGITLPFVSY	1541.81	9.8022	30	12	11.956	0.172	1.43	0.029	3	High	0.012	0.0430836
	Mel_Na_mel	MELB	154	168	AGFVTAGITLPFVSY	1541.81	9.7959	300	12	12	0.194	1.62	0.136	3	High	0.055	0.0122096
	Mel_Na_mel	MELB	154	168	AGFVTAGITLPFVSY	1541.81	9.7558	3000	12	12	0.273	2.271	0.161	3	High	0.065	0.0289923
	Mel_Na_mel	MELB	156	163	FVTAGITL	820.47	6.8511	0	6	0	0	0	n/a	1	Medium	0
	Mel_Na_mel	MELB	156	163	FVTAGITL	820.47	6.8479	30	6	5.992	0.013	0.221	0.062	3	Medium	0.025	0.33309
	Mel_Na_mel	MELB	156	163	FVTAGITL	820.47	6.7959	300	6	6	0.042	0.697	0.082	3	Medium	0.033	0.0415906
	Mel_Na_mel	MELB	156	163	FVTAGITL	820.47	6.7631	3000	6	6	0.046	0.759	0.069	3	Medium	0.028	0.205383
	Mel_Na_mel	MELB	157	168	VTAGITLPFVSY	1266.69	8.7686	0	9	0	0	0	n/a	1	Medium	0
	Mel_Na_mel	MELB	157	168	VTAGITLPFVSY	1266.69	8.7268	30	9	8.973	0.103	1.15	0.018	3	Medium	0.007	0.120244
	Mel_Na_mel	MELB	157	168	VTAGITLPFVSY	1266.69	8.7251	300	9	9	0.112	1.244	0.074	3	Medium	0.03	0.0279282
	Mel_Na_mel	MELB	157	168	VTAGITLPFVSY	1266.69	8.7283	3000	9	9	0.108	1.204	0.133	3	Medium	0.054	0.0656589
	Mel_Na_mel	MELB	159	168	AGITLPFVSY	1066.57	8.8162	0	7	0	0	0	n/a	1	High	0
	Mel_Na_mel	MELB	159	168	AGITLPFVSY	1066.57	8.8153	30	7	6.973	0.088	1.251	0.028	3	High	0.011	0.00802365
	Mel_Na_mel	MELB	159	168	AGITLPFVSY	1066.57	8.7971	300	7	7	0.103	1.471	0.057	3	High	0.023	0.0248403
	Mel_Na_mel	MELB	159	168	AGITLPFVSY	1066.57	8.7982	3000	7	7	0.121	1.725	0.144	3	High	0.058	0.0134942
	Mel_Na_mel	MELB	169	180	VGGADRGFGFQM	1240.57	6.6104	0	10	0	0	0	n/a	1	Medium	0
	Mel_Na_mel	MELB	169	180	VGGADRGFGFQM	1240.57	6.5607	30	10	10	0.099	0.989	0.027	3	Medium	0.011	0.4449
	Mel_Na_mel	MELB	169	180	VGGADRGFGFQM	1240.57	6.5617	300	10	10	0.119	1.188	0.105	3	Medium	0.042	0.0699771
	Mel_Na_mel	MELB	169	180	VGGADRGFGFQM	1240.57	6.5319	3000	10	10	0.104	1.043	0.105	3	Medium	0.042	0.238477
	Mel_Na_mel	MELB	174	180	RGFGFQM	841.39	6.5103	0	5	0	0	0	n/a	1	Medium	0
	Mel_Na_mel	MELB	174	180	RGFGFQM	841.39	6.4752	30	5	5	0.038	0.753	0.032	3	Medium	0.013	0.121021
	Mel_Na_mel	MELB	174	180	RGFGFQM	841.39	6.4807	300	5	5	0.019	0.386	0.015	3	Medium	0.006	0.0495042
	Mel_Na_mel	MELB	174	180	RGFGFQM	841.39	6.4536	3000	5	5	0.018	0.356	0.043	3	Medium	0.017	0.419885
	Mel_Na_mel	MELB	184	187	VLIA	414.284	3.3589	0	2	0	0	0	n/a	1	Medium	0
	Mel_Na_mel	MELB	184	187	VLIA	414.284	3.366	30	2	1.871	0.007	0.366	0.003	3	Medium	0.001	0.00608727
	Mel_Na_mel	MELB	184	187	VLIA	414.284	3.3735	300	2	2	0.002	0.116	0.003	3	Medium	0.001	0.585487
	Mel_Na_mel	MELB	184	187	VLIA	414.284	3.3767	3000	2	2	0.001	0.055	0.013	3	Medium	0.005	0.955812
	Mel_Na_mel	MELB	186	191	IAFFIA	680.39	8.6823	0	4	0	0	0	n/a	1	Medium	0
	Mel_Na_mel	MELB	186	191	IAFFIA	680.39	8.5875	30	4	3.979	0	-0.004	0.013	3	Medium	0.005	0.20862
	Mel_Na_mel	MELB	186	191	IAFFIA	680.39	8.6194	300	4	4	0.006	0.149	0.017	3	Medium	0.007	0.774448
	Mel_Na_mel	MELB	186	191	IAFFIA	680.39	8.6206	3000	4	4	0.016	0.406	0.026	3	Medium	0.01	0.851381
	Mel_Na_mel	MELB	190	198	IASTIVTLR	972.597	3.9385	0	7	0	0	0	n/a	1	Medium	0
	Mel_Na_mel	MELB	190	198	IASTIVTLR	972.597	3.8478	30	7	6.871	0.025	0.354	0.048	3	Medium	0.019	0.72384
	Mel_Na_mel	MELB	190	198	IASTIVTLR	972.597	3.8398	300	7	7	0.059	0.846	0.038	3	Medium	0.015	0.142094
	Mel_Na_mel	MELB	190	198	IASTIVTLR	972.597	3.8477	3000	7	7	0.026	0.377	0.017	3	Medium	0.007	0.183584
	Mel_Na_mel	MELB	192	198	STIVTLR	788.476	3.0198	0	5	0	0	0	n/a	1	Medium	0
	Mel_Na_mel	MELB	192	198	STIVTLR	788.476	3.0178	30	5	4.871	0.059	1.189	0.024	3	Medium	0.01	0.053714
	Mel_Na_mel	MELB	192	198	STIVTLR	788.476	3.0095	300	5	5	0.061	1.214	0.064	2	Medium	0.007	0.102016
	Mel_Na_mel	MELB	192	198	STIVTLR	788.476	3.0051	3000	5	5	0.045	0.897	0.047	3	Medium	0.019	0.268314
	Mel_Na_mel	MELB	192	199	STIVTLRN	902.519	2.7117	0	6	0	0	0	n/a	1	Medium	0
	Mel_Na_mel	MELB	192	199	STIVTLRN	902.519	2.6494	30	6	5.871	0.157	2.615	0.149	3	Medium	0.06	0.840118
	Mel_Na_mel	MELB	192	199	STIVTLRN	902.519	2.6772	300	6	6	0.136	2.273	0.006	3	Medium	0.002	0.510305
	Mel_Na_mel	MELB	192	199	STIVTLRN	902.519	2.7158	3000	6	6	0.093	1.544	0.066	3	Medium	0.027	0.241414
	Mel_Na_mel	MELB	192	200	STIVTLRNV	1001.59	4.4955	0	7	0	0	0	n/a	1	Medium	0
	Mel_Na_mel	MELB	192	200	STIVTLRNV	1001.59	4.4318	30	7	6.87	0.102	1.457	0.012	3	Medium	0.005	0.00755501
	Mel_Na_mel	MELB	192	200	STIVTLRNV	1001.59	4.4255	300	7	7	0.085	1.213	0.03	3	Medium	0.012	0.0257752
	Mel_Na_mel	MELB	192	200	STIVTLRNV	1001.59	4.4436	3000	7	7	0.075	1.075	0.026	3	Medium	0.01	0.243714
	Mel_Na_mel	MELB	192	201	STIVTLRNVH	1138.65	2.8416	0	8	0	0	0	n/a	1	Medium	0
	Mel_Na_mel	MELB	192	201	STIVTLRNVH	1138.65	2.7909	30	8	7.87	0.095	1.183	0.026	3	Medium	0.01	0.0212575
	Mel_Na_mel	MELB	192	201	STIVTLRNVH	1138.65	2.7815	300	8	8	0.094	1.17	0.036	3	Medium	0.014	0.0988179
	Mel_Na_mel	MELB	192	201	STIVTLRNVH	1138.65	2.8346	3000	8	8	0.056	0.697	0.018	3	Medium	0.007	0.34187
	Mel_Na_mel	MELB	192	203	STIVTLRNVHEV	1366.76	3.9623	0	10	0	0	0	n/a	1	High	0
	Mel_Na_mel	MELB	192	203	STIVTLRNVHEV	1366.76	3.8959	30	10	9.792	0.119	1.186	0.049	3	High	0.02	0.183553
	Mel_Na_mel	MELB	192	203	STIVTLRNVHEV	1366.76	3.8894	300	10	10	0.119	1.189	0.051	3	High	0.021	0.227459
	Mel_Na_mel	MELB	192	203	STIVTLRNVHEV	1366.76	3.9012	3000	10	10	0.126	1.261	0.12	3	High	0.048	0.173871
	Mel_Na_mel	MELB	194	197	IVTL	444.295	4.5424	0	2	0	0	0	n/a	1	Medium	0
	Mel_Na_mel	MELB	194	197	IVTL	444.295	5.419	30	2	1.999	0.083	4.165	0.007	3	Medium	0.003	0.00606416
	Mel_Na_mel	MELB	194	197	IVTL	444.295	5.4107	300	2	2	0.085	4.254	0.003	3	Medium	0.001	0.265965
	Mel_Na_mel	MELB	194	197	IVTL	444.295	5.3814	3000	2	2	0.09	4.475	0.041	3	Medium	0.017	0.00864386
	Mel_Na_mel	MELB	194	198	IVTLR	600.396	2.299	0	3	0	0	0	n/a	1	Medium	0
	Mel_Na_mel	MELB	194	198	IVTLR	600.396	2.2844	30	3	2.999	0.006	0.21	0.021	3	Medium	0.009	0.769324
	Mel_Na_mel	MELB	194	198	IVTLR	600.396	2.2866	300	3	3	0.011	0.375	0.027	3	Medium	0.011	0.142663
	Mel_Na_mel	MELB	194	198	IVTLR	600.396	2.3258	3000	3	3	0.014	0.466	0.033	3	Medium	0.013	0.793453
	Mel_Na_mel	MELB	194	199	IVTLRN	714.439	2.0768	0	4	0	0	0	n/a	1	Medium	0
	Mel_Na_mel	MELB	194	199	IVTLRN	714.439	2.0571	30	4	3.999	0.015	0.364	0.013	3	Medium	0.005	0.258947
	Mel_Na_mel	MELB	194	199	IVTLRN	714.439	2.0731	300	4	4	0.011	0.279	0.024	3	Medium	0.01	0.00919834
	Mel_Na_mel	MELB	194	199	IVTLRN	714.439	2.1154	3000	4	4	0.012	0.29	0.006	3	Medium	0.002	0.868746
	Mel_Na_mel	MELB	194	200	IVTLRNV	813.507	3.9756	0	5	0	0	0	n/a	1	Medium	0
	Mel_Na_mel	MELB	194	200	IVTLRNV	813.507	3.9263	30	5	4.999	0.058	1.157	0.019	3	Medium	0.007	0.278545
	Mel_Na_mel	MELB	194	200	IVTLRNV	813.507	3.9266	300	5	5	0.084	1.687	0.153	3	Medium	0.062	0.510591
	Mel_Na_mel	MELB	194	200	IVTLRNV	813.507	3.9388	3000	5	5	0.075	1.495	0.204	3	Medium	0.082	0.227337
	Mel_Na_mel	MELB	194	201	IVTLRNVH	950.566	2.1962	0	6	0	0	0	n/a	1	Medium	0
	Mel_Na_mel	MELB	194	201	IVTLRNVH	950.566	2.1928	30	6	5.999	0.113	1.885	0.047	3	Medium	0.019	0.0409263
	Mel_Na_mel	MELB	194	201	IVTLRNVH	950.566	2.1755	300	6	6	0.095	1.588	0.014	3	Medium	0.006	0.00468892
	Mel_Na_mel	MELB	194	201	IVTLRNVH	950.566	2.2569	3000	6	6	0.092	1.536	0.004	3	Medium	0.002	0.282167
	Mel_Na_mel	MELB	194	203	IVTLRNVHEV	1178.68	3.4249	0	8	0	0	0	n/a	1	Medium	0
	Mel_Na_mel	MELB	194	203	IVTLRNVHEV	1178.68	3.4105	30	8	7.921	0.146	1.819	0.085	3	Medium	0.034	0.0932661
	Mel_Na_mel	MELB	194	203	IVTLRNVHEV	1178.68	3.3755	300	8	8	0.141	1.768	0.205	3	Medium	0.083	0.425748
	Mel_Na_mel	MELB	194	203	IVTLRNVHEV	1178.68	3.4138	3000	8	8	0.172	2.148	0.038	3	Medium	0.015	0.548022
	Mel_Na_mel	MELB	194	204	IVTLRNVHEVY	1341.74	4.1416	0	9	0	0	0	n/a	1	Medium	0
	Mel_Na_mel	MELB	194	204	IVTLRNVHEVY	1341.74	4.0811	30	9	8.92	0.146	1.621	0.05	3	High	0.02	0.26071
	Mel_Na_mel	MELB	194	204	IVTLRNVHEVY	1341.74	4.0965	300	9	9	0.123	1.364	0.035	3	High	0.014	0.0543705
	Mel_Na_mel	MELB	194	204	IVTLRNVHEVY	1341.74	4.0808	3000	9	9	0.174	1.929	0.183	3	High	0.074	0.142948
	Mel_Na_mel	MELB	208	217	NGVTAGRPHL	1020.55	2.1697	0	7	0	0	0	n/a	1	Medium	0
	Mel_Na_mel	MELB	208	217	NGVTAGRPHL	1020.55	2.2103	30	7	6.995	0.1	1.435	0.069	3	Medium	0.028	0.0058576
	Mel_Na_mel	MELB	208	217	NGVTAGRPHL	1020.55	2.1789	300	7	7	0.16	2.293	0.269	3	Medium	0.108	0.111301
	Mel_Na_mel	MELB	208	217	NGVTAGRPHL	1020.55	2.2551	3000	7	7	0.163	2.325	0.225	3	Medium	0.091	0.421168
	Mel_Na_mel	MELB	212	225	AGRPHLTLKTIVGL	1474.9	5.7772	0	11	0	0	0	n/a	1	Medium	0
	Mel_Na_mel	MELB	212	225	AGRPHLTLKTIVGL	1474.9	5.7361	30	11	10.87	0.571	5.192	0.384	3	Medium	0.155	0.611754
	Mel_Na_mel	MELB	212	225	AGRPHLTLKTIVGL	1474.9	5.7143	300	11	11	0.735	6.686	0.308	3	Medium	0.124	0.0147051
	Mel_Na_mel	MELB	212	225	AGRPHLTLKTIVGL	1474.9	5.6752	3000	11	11	0.811	7.377	0.019	3	Medium	0.008	0.249991
	Mel_Na_mel	MELB	219	225	LKTIVGL	742.495	5.0338	0	5	0	0	0	n/a	1	Medium	0
	Mel_Na_mel	MELB	219	225	LKTIVGL	742.495	5.0035	30	5	4.87	0.207	4.148	0.055	3	Medium	0.022	0.0201576
	Mel_Na_mel	MELB	219	225	LKTIVGL	742.495	5.0046	300	5	5	0.223	4.459	0.069	3	Medium	0.028	0.0563532
	Mel_Na_mel	MELB	219	225	LKTIVGL	742.495	5.015	3000	5	5	0.244	4.879	0.188	3	Medium	0.076	0.0268099
	Mel_Na_mel	MELB	219	227	LKTIVGLIY	1018.64	7.4528	0	7	0	0	0	n/a	1	High	0
	Mel_Na_mel	MELB	219	227	LKTIVGLIY	1018.64	7.4075	30	7	6.738	0.186	2.659	0.065	3	Medium	0.026	0.115903
	Mel_Na_mel	MELB	219	227	LKTIVGLIY	1018.64	7.3978	300	7	7	0.174	2.484	0.062	3	Medium	0.025	0.0640843
	Mel_Na_mel	MELB	219	227	LKTIVGLIY	1018.64	7.3879	3000	7	7	0.186	2.664	0.174	3	Medium	0.07	0.0924776
	Mel_Na_mel	MELB	220	225	KTIVGL	629.411	3.8592	0	4	0	0	0	n/a	1	Medium	0
	Mel_Na_mel	MELB	220	225	KTIVGL	629.411	3.7875	30	4	3.87	0.04	1.009	0.023	3	Medium	0.009	0.244472
	Mel_Na_mel	MELB	220	225	KTIVGL	629.411	3.7796	300	4	4	0.034	0.856	0.012	3	Medium	0.005	0.159404
	Mel_Na_mel	MELB	220	225	KTIVGL	629.411	3.8393	3000	4	4	0.021	0.514	0.099	3	Medium	0.04	0.0440008
	Mel_Na_mel	MELB	220	227	KTIVGLIY	905.559	6.2119	0	6	0	0	0	n/a	1	Medium	0
	Mel_Na_mel	MELB	220	227	KTIVGLIY	905.559	6.2471	30	6	5.738	0.094	1.569	0.049	3	Medium	0.02	0.129746
	Mel_Na_mel	MELB	220	227	KTIVGLIY	905.559	6.2485	300	6	6	0.085	1.409	0.021	3	Medium	0.008	0.657154
	Mel_Na_mel	MELB	220	227	KTIVGLIY	905.559	6.2185	3000	6	6	0.056	0.928	0.035	3	Medium	0.014	0.0497292
	Mel_Na_mel	MELB	221	225	TIVGL	501.316	5.0915	0	3	0	0	0	n/a	1	High	0
	Mel_Na_mel	MELB	221	225	TIVGL	501.316	5.0641	30	3	2.875	0.049	1.629	0.034	3	High	0.014	0.787487
	Mel_Na_mel	MELB	221	225	TIVGL	501.316	5.0559	300	3	3	0.049	1.639	0.017	3	High	0.007	0.286961
	Mel_Na_mel	MELB	221	225	TIVGL	501.316	5.0562	3000	3	3	0.048	1.597	0.042	3	High	0.017	0.0334395
	Mel_Na_mel	MELB	222	227	IVGLIY	676.416	6.9396	0	4	0	0	0	n/a	1	Medium	0
	Mel_Na_mel	MELB	222	227	IVGLIY	676.416	6.9386	30	4	3.867	0.04	0.992	0.043	3	Medium	0.017	0.224704
	Mel_Na_mel	MELB	222	227	IVGLIY	676.416	6.9256	300	4	4	0.016	0.408	0.119	3	Medium	0.048	0.226949
	Mel_Na_mel	MELB	222	227	IVGLIY	676.416	6.9044	3000	4	4	0.009	0.237	0.087	3	Medium	0.035	0.0239154
	Mel_Na_mel	MELB	226	232	IYKNDQL	892.465	2.6746	0	5	0	0	0	n/a	1	High	0
	Mel_Na_mel	MELB	226	232	IYKNDQL	892.465	2.6548	30	5	4.999	0.085	1.691	0.025	3	High	0.01	0.000938772
	Mel_Na_mel	MELB	226	232	IYKNDQL	892.465	2.6455	300	5	5	0.119	2.374	0.103	3	High	0.042	0.00993753
	Mel_Na_mel	MELB	226	232	IYKNDQL	892.465	2.7052	3000	5	5	0.236	4.71	0.211	3	High	0.085	0.0588097
	Mel_Na_mel	MELB	226	235	IYKNDQLSCL	1195.59	5.2967	0	8	0	0	0	n/a	1	High	0
	Mel_Na_mel	MELB	226	235	IYKNDQLSCL	1195.59	5.2532	30	8	7.999	0.001	0.016	0.017	3	High	0.007	0.00216388
	Mel_Na_mel	MELB	226	235	IYKNDQLSCL	1195.59	5.254	300	8	8	0.006	0.076	0.144	3	Medium	0.058	0.0442604
	Mel_Na_mel	MELB	226	235	IYKNDQLSCL	1195.59	5.2161	3000	8	8	0.132	1.656	0.1	3	High	0.04	0.184294
	Mel_Na_mel	MELB	230	235	DQLSCL	677.305	5.5635	0	4	0	0	0	n/a	1	Medium	0
	Mel_Na_mel	MELB	230	235	DQLSCL	677.305	5.4981	30	4	3.999	0.057	1.429	0.027	3	Medium	0.011	0.583211
	Mel_Na_mel	MELB	230	235	DQLSCL	677.305	5.5059	300	4	4	0.055	1.379	0.015	3	Medium	0.006	0.15156
	Mel_Na_mel	MELB	230	235	DQLSCL	677.305	5.4904	3000	4	4	0.056	1.405	0.028	3	Medium	0.011	0.397588
	Mel_Na_mel	MELB	231	235	QLSCL	562.279	5.0602	0	3	0	0	0	n/a	1	Medium	0
	Mel_Na_mel	MELB	231	235	QLSCL	562.279	5.0094	30	3	3	-0.024	-0.801	0.008	3	Medium	0.003	0.453149
	Mel_Na_mel	MELB	231	235	QLSCL	562.279	5.0066	300	3	3	-0.023	-0.77	0.095	3	Medium	0.038	0.307871
	Mel_Na_mel	MELB	231	235	QLSCL	562.279	5.0047	3000	3	3	0.022	0.722	0.083	3	Medium	0.033	0.0694726
	Mel_Na_mel	MELB	236	239	LGMA	390.194	2.643	0	2	0	0	0	n/a	1	Medium	0
	Mel_Na_mel	MELB	236	239	LGMA	390.194	2.5948	30	2	2	0.022	1.111	0.044	3	Medium	0.018	0.134688
	Mel_Na_mel	MELB	236	239	LGMA	390.194	2.5959	300	2	2	0.034	1.72	0.003	3	Medium	0.001	0.0843509
	Mel_Na_mel	MELB	236	239	LGMA	390.194	2.6097	3000	2	2	0.12	5.981	0.171	3	Medium	0.069	0.360649
	Mel_Na_mel	MELB	240	250	LAYNIASNIIN	1204.65	6.3187	0	9	0	0	0	n/a	1	Medium	0
	Mel_Na_mel	MELB	240	250	LAYNIASNIIN	1204.65	6.296	30	9	8.857	0.083	0.928	0.055	3	Medium	0.022	0.103206
	Mel_Na_mel	MELB	240	250	LAYNIASNIIN	1204.65	6.2883	300	9	9	0.081	0.904	0.042	3	Medium	0.017	0.209339
	Mel_Na_mel	MELB	240	250	LAYNIASNIIN	1204.65	6.2818	3000	9	9	0.092	1.019	0.052	3	Medium	0.021	0.191331
	Mel_Na_mel	MELB	242	255	YNIASNIINGFAIY	1571.8	10.0304	0	12	0	0	0	n/a	1	High	0
	Mel_Na_mel	MELB	242	255	YNIASNIINGFAIY	1571.8	10.0239	30	12	11.818	0.228	1.9	0.095	3	Medium	0.038	0.0159172
	Mel_Na_mel	MELB	242	255	YNIASNIINGFAIY	1571.8	10.0071	300	12	12	0.174	1.446	0.015	3	Medium	0.006	0.199821
	Mel_Na_mel	MELB	242	255	YNIASNIINGFAIY	1571.8	9.9986	3000	12	12	0.212	1.767	0.124	3	Medium	0.05	0.155577
	Mel_Na_mel	MELB	244	255	IASNIINGFAIY	1294.69	8.4658	0	10	0	0	0	n/a	1	High	0
	Mel_Na_mel	MELB	244	255	IASNIINGFAIY	1294.69	8.4389	30	10	9.819	0.186	1.858	0.067	3	High	0.027	0.0065143
	Mel_Na_mel	MELB	244	255	IASNIINGFAIY	1294.69	8.4292	300	10	10	0.143	1.426	0.004	3	High	0.001	0.936458
	Mel_Na_mel	MELB	244	255	IASNIINGFAIY	1294.69	8.4341	3000	10	10	0.121	1.213	0.074	3	High	0.03	0.115829
	Mel_Na_mel	MELB	246	255	SNIINGFAIY	1110.57	8.0633	0	8	0	0	0	n/a	1	High	0
	Mel_Na_mel	MELB	246	255	SNIINGFAIY	1110.57	8.1063	30	8	7.819	0.15	1.877	0.055	3	Medium	0.022	0.00784707
	Mel_Na_mel	MELB	246	255	SNIINGFAIY	1110.57	8.0994	300	8	8	0.123	1.532	0.002	3	Medium	0.001	0.361464
	Mel_Na_mel	MELB	246	255	SNIINGFAIY	1110.57	8.0931	3000	8	8	0.105	1.307	0.061	3	Medium	0.025	0.132689
	Mel_Na_mel	MELB	252	255	FAIY	512.264	6.0176	0	2	0	0	0	n/a	1	High	0
	Mel_Na_mel	MELB	252	255	FAIY	512.264	6.0115	30	2	1.961	0.074	3.68	0.027	3	High	0.011	0.00353514
	Mel_Na_mel	MELB	252	255	FAIY	512.264	5.9675	300	2	2	0.051	2.55	0.015	3	High	0.006	0.144101
	Mel_Na_mel	MELB	252	255	FAIY	512.264	5.988	3000	2	2	0.036	1.795	0.041	3	High	0.016	0.395113
	Mel_Na_mel	MELB	254	257	IYYF	604.29	7.604	0	2	0	0	0	n/a	1	Medium	0
	Mel_Na_mel	MELB	254	257	IYYF	604.29	7.5891	30	2	2	0.011	0.573	0.03	3	Medium	0.012	0.289561
	Mel_Na_mel	MELB	254	257	IYYF	604.29	7.5749	300	2	2	0.004	0.178	0.027	3	Medium	0.011	0.903477
	Mel_Na_mel	MELB	254	257	IYYF	604.29	7.5649	3000	2	2	0.002	0.09	0.01	3	Medium	0.004	0.0648028
	Mel_Na_mel	MELB	256	259	YFTY	592.253	5.5469	0	2	0	0	0	n/a	1	High	0
	Mel_Na_mel	MELB	256	259	YFTY	592.253	5.5657	30	2	2	0.088	4.38	0.113	3	High	0.045	0.0930179
	Mel_Na_mel	MELB	256	259	YFTY	592.253	5.5643	300	2	2	0.075	3.772	0.028	3	High	0.011	0.0169072
	Mel_Na_mel	MELB	256	259	YFTY	592.253	5.5434	3000	2	2	0.059	2.957	0.029	3	High	0.012	0.50979
	Mel_Na_mel	MELB	258	262	TYVIG	551.295	3.706	0	3	0	0	0	n/a	1	Medium	0
	Mel_Na_mel	MELB	258	262	TYVIG	551.295	3.6806	30	3	2.891	0.255	8.504	0.028	3	Medium	0.011	0.00281004
	Mel_Na_mel	MELB	258	262	TYVIG	551.295	3.6963	300	3	3	0.224	7.469	0.059	3	Medium	0.024	0.601885
	Mel_Na_mel	MELB	258	262	TYVIG	551.295	3.6332	3000	3	3	0.157	5.241	0.353	3	Medium	0.142	0.303031
	Mel_Na_mel	MELB	263	267	DADLF	579.254	6.2177	0	3	0	0	0	n/a	1	Medium	0
	Mel_Na_mel	MELB	263	267	DADLF	579.254	6.1643	30	3	2.956	0.196	6.537	0.015	3	Medium	0.006	4.99781e-05
	Mel_Na_mel	MELB	263	267	DADLF	579.254	6.1527	300	3	3	0.221	7.354	0.099	3	Medium	0.04	0.414965
	Mel_Na_mel	MELB	263	267	DADLF	579.254	6.1335	3000	3	3	0.159	5.299	0.321	3	Medium	0.129	0.384026
	Mel_Na_mel	MELB	263	270	DADLFPYY	1002.43	8.4277	0	5	0	0	0	n/a	1	High	0
	Mel_Na_mel	MELB	263	270	DADLFPYY	1002.43	8.4531	30	5	4.952	0.247	4.94	0.002	3	High	0.001	0.00290148
	Mel_Na_mel	MELB	263	270	DADLFPYY	1002.43	8.4146	300	5	5	0.257	5.148	0.113	3	Medium	0.045	0.676261
	Mel_Na_mel	MELB	263	270	DADLFPYY	1002.43	8.3631	3000	5	5	0.224	4.482	0.268	3	Medium	0.108	0.306316
	Mel_Na_mel	MELB	266	270	LFPYY	701.342	7.2937	0	2	0	0	0	n/a	1	High	0
	Mel_Na_mel	MELB	266	270	LFPYY	701.342	7.2569	30	2	1.996	0.056	2.807	0.018	3	High	0.007	0.0533605
	Mel_Na_mel	MELB	266	270	LFPYY	701.342	7.2322	300	2	2	0.056	2.79	0.017	3	High	0.007	0.399647
	Mel_Na_mel	MELB	266	270	LFPYY	701.342	7.2327	3000	2	2	0.043	2.158	0.059	3	High	0.024	0.188224
	Mel_Na_mel	MELB	273	282	YAGAANLLTL	1005.55	7.8533	0	8	0	0	0	n/a	1	High	0
	Mel_Na_mel	MELB	273	282	YAGAANLLTL	1005.55	7.8131	30	8	7.946	0.14	1.748	0.069	3	High	0.028	0.381947
	Mel_Na_mel	MELB	273	282	YAGAANLLTL	1005.55	7.8072	300	8	8	0.151	1.893	0.029	3	High	0.011	0.0220506
	Mel_Na_mel	MELB	273	282	YAGAANLLTL	1005.55	7.8043	3000	8	8	0.169	2.114	0.115	3	High	0.046	0.0554461
	Mel_Na_mel	MELB	274	282	AGAANLLTL	842.486	7.2455	0	7	0	0	0	n/a	1	High	0
	Mel_Na_mel	MELB	274	282	AGAANLLTL	842.486	7.2176	30	7	6.946	0.031	0.445	0.098	3	High	0.039	0.683355
	Mel_Na_mel	MELB	274	282	AGAANLLTL	842.486	7.1947	300	7	7	0.04	0.572	0.032	3	High	0.013	0.1063
	Mel_Na_mel	MELB	274	282	AGAANLLTL	842.486	7.215	3000	7	7	0.044	0.627	0.07	3	High	0.028	0.0557675
	Mel_Na_mel	MELB	281	288	TLIVFPRL	957.601	8.0949	0	5	0	0	0	n/a	1	High	0
	Mel_Na_mel	MELB	281	288	TLIVFPRL	957.601	8.0405	30	5	4.747	0.267	5.338	0.025	3	High	0.01	0.000477416
	Mel_Na_mel	MELB	281	288	TLIVFPRL	957.601	8.037	300	5	5	0.288	5.762	0.141	3	High	0.057	0.357717
	Mel_Na_mel	MELB	281	288	TLIVFPRL	957.601	8.0238	3000	5	5	0.29	5.803	0.205	3	High	0.082	0.101589
	Mel_Na_mel	MELB	283	288	IVFPRL	743.469	6.8928	0	3	0	0	0	n/a	1	High	0
	Mel_Na_mel	MELB	283	288	IVFPRL	743.469	6.846	30	3	2.999	0.244	8.128	0.037	3	Medium	0.015	0.00217378
	Mel_Na_mel	MELB	283	288	IVFPRL	743.469	6.8479	300	3	3	0.269	8.964	0.095	3	Medium	0.038	0.197897
	Mel_Na_mel	MELB	283	288	IVFPRL	743.469	6.7805	3000	3	3	0.267	8.895	0.163	3	Medium	0.066	0.0886776
	Mel_Na_mel	MELB	283	290	IVFPRLVK	970.633	4.3044	0	5	0	0	0	n/a	1	Medium	0
	Mel_Na_mel	MELB	283	290	IVFPRLVK	970.633	4.2789	30	5	4.887	0.47	9.391	0.038	3	Medium	0.015	0.00201704
	Mel_Na_mel	MELB	283	290	IVFPRLVK	970.633	4.2672	300	5	5	0.406	8.117	0.127	3	Medium	0.051	0.468904
	Mel_Na_mel	MELB	283	290	IVFPRLVK	970.633	4.2852	3000	5	5	0.434	8.672	0.325	3	Medium	0.131	0.0321017
	Mel_Na_mel	MELB	289	292	VKML	489.298	3.0198	0	2	0	0	0	n/a	1	Medium	0
	Mel_Na_mel	MELB	289	292	VKML	489.298	2.9629	30	2	1.998	0.094	4.722	0.033	3	Medium	0.013	0.0318093
	Mel_Na_mel	MELB	289	292	VKML	489.298	2.9624	300	2	2	0.09	4.494	0.018	3	Medium	0.007	0.0810041
	Mel_Na_mel	MELB	289	292	VKML	489.298	2.9749	3000	2	2	0.112	5.624	0.068	3	Medium	0.027	0.0301561
	Mel_Na_mel	MELB	291	297	MLSRRIL	887.538	3.1844	0	5	0	0	0	n/a	1	Medium	0
	Mel_Na_mel	MELB	291	297	MLSRRIL	887.538	3.114	30	5	4.935	0.388	7.77	0.119	3	Medium	0.048	0.0104232
	Mel_Na_mel	MELB	291	297	MLSRRIL	887.538	3.1397	300	5	5	0.46	9.195	0.386	3	Medium	0.155	0.044397
	Mel_Na_mel	MELB	291	297	MLSRRIL	887.538	3.1651	3000	5	5	0.527	10.534	0.365	3	Medium	0.147	0.346437
	Mel_Na_mel	MELB	292	297	LSRRIL	756.497	2.4047	0	4	0	0	0	n/a	1	High	0
	Mel_Na_mel	MELB	292	297	LSRRIL	756.497	2.3973	30	4	3.935	0.319	7.976	0.116	3	Medium	0.047	0.0117903
	Mel_Na_mel	MELB	292	297	LSRRIL	756.497	2.3397	300	4	4	0.402	10.051	0.37	3	Medium	0.149	0.0734685
	Mel_Na_mel	MELB	292	297	LSRRIL	756.497	2.4445	3000	4	4	0.443	11.082	0.286	3	Medium	0.115	0.0765608
	Mel_Na_mel	MELB	295	301	RILWAGA	785.455	5.4832	0	5	0	0	0	n/a	1	Medium	0
	Mel_Na_mel	MELB	295	301	RILWAGA	785.455	5.4866	30	5	4.925	0.091	1.826	0.071	3	Medium	0.029	0.296334
	Mel_Na_mel	MELB	295	301	RILWAGA	785.455	5.4805	300	5	5	0.071	1.412	0.075	3	Medium	0.03	0.179085
	Mel_Na_mel	MELB	295	301	RILWAGA	785.455	5.4325	3000	5	5	0.069	1.375	0.087	3	Medium	0.035	0.0231022
	Mel_Na_mel	MELB	308	312	SCAGL	449.194	3.0092	0	3	0	0	0	n/a	1	High	0
	Mel_Na_mel	MELB	308	312	SCAGL	449.194	2.9699	30	3	2.999	0.009	0.287	0.007	3	High	0.003	0.0433848
	Mel_Na_mel	MELB	308	312	SCAGL	449.194	2.9818	300	3	3	0.012	0.393	0.015	3	High	0.006	0.063998
	Mel_Na_mel	MELB	308	312	SCAGL	449.194	3.0015	3000	3	3	0.008	0.251	0.01	3	Medium	0.004	0.0493303
	Mel_Na_mel	MELB	308	313	SCAGLF	596.263	6.6209	0	4	0	0	0	n/a	1	High	0
	Mel_Na_mel	MELB	308	313	SCAGLF	596.263	6.561	30	4	3.997	0.011	0.283	0.026	3	High	0.01	0.60705
	Mel_Na_mel	MELB	308	313	SCAGLF	596.263	6.5599	300	4	4	0.007	0.178	0.034	3	Medium	0.014	0.44258
	Mel_Na_mel	MELB	308	313	SCAGLF	596.263	6.5688	3000	4	4	0.017	0.436	0.009	3	Medium	0.004	0.00553574
	Mel_Na_mel	MELB	316	321	ALADIH	638.339	2.2462	0	4	0	0	0	n/a	1	Medium	0
	Mel_Na_mel	MELB	316	321	ALADIH	638.339	2.2263	30	4	3.892	0.399	9.977	0.235	3	Medium	0.095	0.351712
	Mel_Na_mel	MELB	316	321	ALADIH	638.339	2.2249	300	4	4	0.576	14.398	0.443	3	Medium	0.178	0.717326
	Mel_Na_mel	MELB	316	321	ALADIH	638.339	2.2462	3000	4	4	0.419	10.486	0.696	3	Medium	0.28	0.219983
	Mel_Na_mel	MELB	316	325	ALADIHNAAL	1007.54	4.2496	0	8	0	0	0	n/a	1	Medium	0
	Mel_Na_mel	MELB	316	325	ALADIHNAAL	1007.54	4.1982	30	8	7.883	0.41	5.127	0.26	3	Medium	0.105	0.125512
	Mel_Na_mel	MELB	316	325	ALADIHNAAL	1007.54	4.2023	300	8	8	0.424	5.304	0.139	3	Medium	0.056	0.295996
	Mel_Na_mel	MELB	316	325	ALADIHNAAL	1007.54	4.2148	3000	8	8	0.368	4.597	0.394	3	Medium	0.159	0.159826
	Mel_Na_mel	MELB	317	323	LADIHNA	752.382	1.9659	0	5	0	0	0	n/a	1	High	0
	Mel_Na_mel	MELB	317	323	LADIHNA	752.382	1.9742	30	5	4.892	0.217	4.342	0.052	3	Medium	0.021	0.383475
	Mel_Na_mel	MELB	317	323	LADIHNA	752.382	1.9655	300	5	5	0.251	5.017	0.207	3	Medium	0.083	0.0931823
	Mel_Na_mel	MELB	317	323	LADIHNA	752.382	2.0004	3000	5	5	0.234	4.682	0.296	3	Medium	0.119	0.18271
	Mel_Na_mel	MELB	317	325	LADIHNAAL	936.503	3.6802	0	7	0	0	0	n/a	1	High	0
	Mel_Na_mel	MELB	317	325	LADIHNAAL	936.503	3.6226	30	7	6.883	0.413	5.899	0.083	3	High	0.033	0.00500814
	Mel_Na_mel	MELB	317	325	LADIHNAAL	936.503	3.6259	300	7	7	0.4	5.713	0.129	3	Medium	0.052	0.209797
	Mel_Na_mel	MELB	317	325	LADIHNAAL	936.503	3.6525	3000	7	7	0.373	5.332	0.344	3	High	0.138	0.144471
	Mel_Na_mel	MELB	341	343	WVL	416.242	7.6579	0	1	0	0	0	n/a	1	Medium	0
	Mel_Na_mel	MELB	341	343	WVL	416.242	7.6035	30	1	0.968	0.001	0.107	0.026	3	Medium	0.011	0.451894
	Mel_Na_mel	MELB	341	343	WVL	416.242	7.5963	300	1	1	0.007	0.684	0.025	3	Medium	0.01	0.0832574
	Mel_Na_mel	MELB	341	343	WVL	416.242	7.5661	3000	1	1	0	-0.02	0.015	3	Medium	0.006	0.233465
	Mel_Na_mel	MELB	348	358	VADTVDYGEFK	1242.58	4.3751	0	9	0	0	0	n/a	1	High	0
	Mel_Na_mel	MELB	348	358	VADTVDYGEFK	1242.58	4.3106	30	9	8.994	0.086	0.954	0.004	3	High	0.001	0.00429494
	Mel_Na_mel	MELB	348	358	VADTVDYGEFK	1242.58	4.3146	300	9	9	0.094	1.044	0.033	3	High	0.013	0.0739256
	Mel_Na_mel	MELB	348	358	VADTVDYGEFK	1242.58	4.3151	3000	9	9	0.111	1.235	0.11	3	High	0.044	0.14269
	Mel_Na_mel	MELB	348	359	VADTVDYGEFKL	1355.66	6.9814	0	10	0	0	0	n/a	1	Medium	0
	Mel_Na_mel	MELB	348	359	VADTVDYGEFKL	1355.66	6.9913	30	10	9.992	0.042	0.421	0.119	3	Medium	0.048	0.282546
	Mel_Na_mel	MELB	348	359	VADTVDYGEFKL	1355.66	6.9715	300	10	10	0.034	0.343	0.031	3	Medium	0.013	0.0748421
	Mel_Na_mel	MELB	348	359	VADTVDYGEFKL	1355.66	6.9251	3000	10	10	0.136	1.357	0.147	3	Medium	0.059	0.338078
	Mel_Na_mel	MELB	350	358	DTVDYGEFK	1072.47	4.1127	0	7	0	0	0	n/a	1	High	0
	Mel_Na_mel	MELB	350	358	DTVDYGEFK	1072.47	4.0849	30	7	6.994	0.079	1.126	0.009	3	High	0.004	0.0333527
	Mel_Na_mel	MELB	350	358	DTVDYGEFK	1072.47	4.0771	300	7	7	0.069	0.988	0.027	3	High	0.011	0.0512287
	Mel_Na_mel	MELB	350	358	DTVDYGEFK	1072.47	4.0862	3000	7	7	0.082	1.176	0.115	3	High	0.046	0.143967
	Mel_Na_mel	MELB	363	367	CESIA	521.216	2.1353	0	3	0	0	0	n/a	1	High	0
	Mel_Na_mel	MELB	363	367	CESIA	521.216	2.1275	30	3	2.999	0.105	3.497	0.046	3	High	0.019	9.86795e-05
	Mel_Na_mel	MELB	363	367	CESIA	521.216	2.1243	300	3	3	0.245	8.171	0.252	3	Medium	0.102	0.0207155
	Mel_Na_mel	MELB	363	367	CESIA	521.216	2.1472	3000	3	3	0.616	20.547	0.421	3	Medium	0.17	0.100006
	Mel_Na_mel	MELB	368	373	YSVQTM	727.321	3.6693	0	4	0	0	0	n/a	1	High	0
	Mel_Na_mel	MELB	368	373	YSVQTM	727.321	3.6279	30	4	3.999	0.037	0.931	0.015	3	High	0.006	0.0224613
	Mel_Na_mel	MELB	368	373	YSVQTM	727.321	3.6258	300	4	4	0.044	1.094	0.043	3	High	0.017	0.0373626
	Mel_Na_mel	MELB	368	373	YSVQTM	727.321	3.656	3000	4	4	0.088	2.201	0.125	3	High	0.05	0.0119997
	Mel_Na_mel	MELB	372	383	TMVVKGGSAFAA	1137.59	3.6218	0	10	0	0	0	n/a	1	Medium	0
	Mel_Na_mel	MELB	372	383	TMVVKGGSAFAA	1137.59	3.5663	30	10	9.913	0.077	0.769	0.056	3	Medium	0.023	0.0949731
	Mel_Na_mel	MELB	372	383	TMVVKGGSAFAA	1137.59	3.5765	300	10	10	0.088	0.875	0.028	3	Medium	0.011	0.315144
	Mel_Na_mel	MELB	372	383	TMVVKGGSAFAA	1137.59	3.596	3000	10	10	0.068	0.676	0.01	3	Medium	0.004	0.325403
	Mel_Na_mel	MELB	374	383	VVKGGSAFAA	905.497	2.5213	0	8	0	0	0	n/a	1	High	0
	Mel_Na_mel	MELB	374	383	VVKGGSAFAA	905.497	2.5032	30	8	8	0.092	1.146	0.024	3	High	0.01	0.0187276
	Mel_Na_mel	MELB	374	383	VVKGGSAFAA	905.497	2.5006	300	8	8	0.085	1.058	0.046	3	High	0.019	0.36503
	Mel_Na_mel	MELB	374	383	VVKGGSAFAA	905.497	2.5206	3000	8	8	0.113	1.407	0.178	3	Medium	0.072	0.97547
	Mel_Na_mel	MELB	377	383	GGSAFAA	579.265	2.956	0	5	0	0	0	n/a	1	Medium	0
	Mel_Na_mel	MELB	377	383	GGSAFAA	579.265	2.9238	30	5	5	0.043	0.862	0.034	3	Medium	0.014	0.977769
	Mel_Na_mel	MELB	377	383	GGSAFAA	579.265	2.9163	300	5	5	0.039	0.771	0.029	3	Medium	0.012	0.717905
	Mel_Na_mel	MELB	377	383	GGSAFAA	579.265	2.9518	3000	5	5	0.025	0.498	0.021	3	Medium	0.008	0.29484
	Mel_Na_mel	MELB	381	385	FAAFF	601.29	8.9284	0	3	0	0	0	n/a	1	Medium	0
	Mel_Na_mel	MELB	381	385	FAAFF	601.29	8.8559	30	3	3	0.066	2.185	0.026	3	Medium	0.01	0.241715
	Mel_Na_mel	MELB	381	385	FAAFF	601.29	8.8481	300	3	3	0.062	2.062	0.04	3	Medium	0.016	0.836543
	Mel_Na_mel	MELB	381	385	FAAFF	601.29	8.8438	3000	3	3	0.061	2.024	0.016	3	Medium	0.006	0.701314
	Mel_Na_mel	MELB	393	403	IGYTPNVAQSA	1119.56	3.4382	0	8	0	0	0	n/a	1	High	0
	Mel_Na_mel	MELB	393	403	IGYTPNVAQSA	1119.56	3.3995	30	8	7.999	0.475	5.94	0.106	3	High	0.043	0.798491
	Mel_Na_mel	MELB	393	403	IGYTPNVAQSA	1119.56	3.4071	300	8	8	0.631	7.883	0.361	3	Medium	0.146	0.159227
	Mel_Na_mel	MELB	393	403	IGYTPNVAQSA	1119.56	3.405	3000	8	8	0.699	8.743	0.705	3	Medium	0.284	0.669657
	Mel_Na_mel	MELB	393	404	IGYTPNVAQSAQ	1247.61	3.1155	0	9	0	0	0	n/a	1	High	0
	Mel_Na_mel	MELB	393	404	IGYTPNVAQSAQ	1247.61	3.1085	30	9	8.999	0.188	2.084	0.041	3	High	0.017	0.0212296
	Mel_Na_mel	MELB	393	404	IGYTPNVAQSAQ	1247.61	3.0988	300	9	9	0.202	2.246	0.101	3	High	0.041	0.133683
	Mel_Na_mel	MELB	393	404	IGYTPNVAQSAQ	1247.61	3.1153	3000	9	9	0.184	2.048	0.303	3	High	0.122	0.352066
	Mel_Na_mel	MELB	393	405	IGYTPNVAQSAQT	1348.66	3.1951	0	10	0	0	0	n/a	1	High	0
	Mel_Na_mel	MELB	393	405	IGYTPNVAQSAQT	1348.66	3.162	30	10	9.999	0.209	2.093	0.043	3	High	0.018	0.0165924
	Mel_Na_mel	MELB	393	405	IGYTPNVAQSAQT	1348.66	3.1608	300	10	10	0.214	2.137	0.085	3	High	0.034	0.146721
	Mel_Na_mel	MELB	393	405	IGYTPNVAQSAQT	1348.66	3.1829	3000	10	10	0.19	1.904	0.321	3	High	0.129	0.317496
	Mel_Na_mel	MELB	405	413	TLQGMQFIM	1067.51	8.5247	0	7	0	0	0	n/a	1	Medium	0
	Mel_Na_mel	MELB	405	413	TLQGMQFIM	1067.51	8.4494	30	7	6.979	0.086	1.236	0.028	3	Medium	0.011	0.0257667
	Mel_Na_mel	MELB	405	413	TLQGMQFIM	1067.51	8.4484	300	7	7	0.043	0.616	0.05	3	Medium	0.02	0.571486
	Mel_Na_mel	MELB	405	413	TLQGMQFIM	1067.51	8.4605	3000	7	7	-0.009	-0.131	0.029	3	Medium	0.012	0.211654
	Mel_Na_mel	MELB	407	411	QGMQF	609.258	5.2545	0	3	0	0	0	n/a	1	Medium	0
	Mel_Na_mel	MELB	407	411	QGMQF	609.258	5.2317	30	3	3	0.129	4.309	0.025	3	Medium	0.01	0.00715742
	Mel_Na_mel	MELB	407	411	QGMQF	609.258	5.1691	300	3	3	0.1	3.328	0.031	3	Medium	0.012	0.352093
	Mel_Na_mel	MELB	407	411	QGMQF	609.258	5.2265	3000	3	3	0.079	2.634	0.027	3	Medium	0.011	0.271615
	Mel_Na_mel	MELB	412	416	IMIVL	587.372	7.922	0	3	0	0	0	n/a	1	Medium	0
	Mel_Na_mel	MELB	412	416	IMIVL	587.372	7.8902	30	3	2.83	-0.035	-1.17	0.032	3	Medium	0.013	0.295206
	Mel_Na_mel	MELB	412	416	IMIVL	587.372	7.8898	300	3	3	-0.03	-0.992	0.047	3	Medium	0.019	0.646985
	Mel_Na_mel	MELB	412	416	IMIVL	587.372	7.8448	3000	3	3	-0.052	-1.724	0.044	3	Medium	0.018	0.247449
	Mel_Na_mel	MELB	414	419	IVLPVL	652.452	7.8567	0	3	0	0	0	n/a	1	Medium	0
	Mel_Na_mel	MELB	414	419	IVLPVL	652.452	7.8451	30	3	2.806	0.014	0.45	0.008	3	Medium	0.003	0.499546
	Mel_Na_mel	MELB	414	419	IVLPVL	652.452	7.7831	300	3	3	0.011	0.355	0.003	3	High	0.001	0.443048
	Mel_Na_mel	MELB	414	419	IVLPVL	652.452	7.7423	3000	3	3	0.013	0.425	0.02	3	High	0.008	0.895127
	Mel_Na_mel	MELB	420	422	FFM	443.188	7.0389	0	1	0	0	0	n/a	1	Medium	0
	Mel_Na_mel	MELB	420	422	FFM	443.188	6.9647	30	1	1	0.026	2.561	0.007	3	Medium	0.003	0.766858
	Mel_Na_mel	MELB	420	422	FFM	443.188	7.0028	300	1	1	0.051	5.094	0.014	3	Medium	0.006	0.221368
	Mel_Na_mel	MELB	420	422	FFM	443.188	6.9724	3000	1	1	0.03	2.999	0.082	3	Medium	0.033	0.734577
	Mel_Na_mel	MELB	420	423	FFMM	574.228	8.6062	0	2	0	0	0	n/a	1	High	0
	Mel_Na_mel	MELB	420	423	FFMM	574.228	8.5501	30	2	2	-0.008	-0.406	0.013	3	High	0.005	0.351434
	Mel_Na_mel	MELB	420	423	FFMM	574.228	8.5467	300	2	2	-0.011	-0.531	0.021	3	High	0.008	0.469487
	Mel_Na_mel	MELB	420	423	FFMM	574.228	8.5463	3000	2	2	0.001	0.062	0.018	3	High	0.007	0.411537
	Mel_Na_mel	MELB	420	424	FFMMT	675.276	7.6469	0	3	0	0	0	n/a	1	Medium	0
	Mel_Na_mel	MELB	420	424	FFMMT	675.276	7.6165	30	3	3	0.02	0.663	0.002	3	Medium	0.001	0.830304
	Mel_Na_mel	MELB	420	424	FFMMT	675.276	7.6233	300	3	3	0.009	0.292	0.026	3	Medium	0.01	0.524439
	Mel_Na_mel	MELB	420	424	FFMMT	675.276	7.5952	3000	3	3	0.017	0.561	0.05	3	Medium	0.02	0.261635
	Mel_Na_mel	MELB	420	425	FFMMTL	788.36	10.152	0	4	0	0	0	n/a	1	Medium	0
	Mel_Na_mel	MELB	420	425	FFMMTL	788.36	10.0826	30	4	3.999	0.019	0.482	0.05	3	Medium	0.02	0.881495
	Mel_Na_mel	MELB	420	425	FFMMTL	788.36	10.0719	300	4	4	0.044	1.096	0.121	3	Medium	0.049	0.55463
	Mel_Na_mel	MELB	420	425	FFMMTL	788.36	10.0686	3000	4	4	0.021	0.533	0.065	3	Medium	0.026	0.524815
	Mel_Na_mel	MELB	421	424	FMMT	528.208	4.4377	0	2	0	0	0	n/a	1	High	0
	Mel_Na_mel	MELB	421	424	FMMT	528.208	4.3895	30	2	2	0.069	3.446	0.01	3	High	0.004	0.984633
	Mel_Na_mel	MELB	421	424	FMMT	528.208	4.3901	300	2	2	0.058	2.908	0.031	3	High	0.013	0.545937
	Mel_Na_mel	MELB	421	424	FMMT	528.208	4.3924	3000	2	2	0.073	3.647	0.015	3	Medium	0.006	0.0339403
	Mel_Na_mel	MELB	422	425	MMTL	494.223	5.6855	0	2	0	0	0	n/a	1	Medium	0
	Mel_Na_mel	MELB	422	425	MMTL	494.223	5.5977	30	2	1.999	0.043	2.169	0.026	3	Medium	0.011	0.449856
	Mel_Na_mel	MELB	422	425	MMTL	494.223	5.5964	300	2	2	0.037	1.867	0.033	3	Medium	0.013	0.678695
	Mel_Na_mel	MELB	422	425	MMTL	494.223	5.5951	3000	2	2	0.068	3.376	0.027	3	Medium	0.011	0.528483
	Mel_Na_mel	MELB	426	430	VLYFR	696.396	4.7138	0	3	0	0	0	n/a	1	Medium	0
	Mel_Na_mel	MELB	426	430	VLYFR	696.396	4.6686	30	3	2.997	0.01	0.335	0.008	3	High	0.003	0.00477779
	Mel_Na_mel	MELB	426	430	VLYFR	696.396	4.6674	300	3	3	-0.002	-0.063	0.013	3	High	0.005	0.513822
	Mel_Na_mel	MELB	426	430	VLYFR	696.396	4.6682	3000	3	3	-0.014	-0.459	0.018	3	High	0.007	0.110504
	Mel_Na_mel	MELB	426	431	VLYFRY	859.459	6.3557	0	4	0	0	0	n/a	1	Medium	0
	Mel_Na_mel	MELB	426	431	VLYFRY	859.459	6.3322	30	4	3.997	0.067	1.677	0.015	3	Medium	0.006	0.00297008
	Mel_Na_mel	MELB	426	431	VLYFRY	859.459	6.3551	300	4	4	0.063	1.573	0.014	3	Medium	0.006	0.197687
	Mel_Na_mel	MELB	426	431	VLYFRY	859.459	6.3373	3000	4	4	0.033	0.818	0.02	3	Medium	0.008	0.104165
	Mel_Na_mel	MELB	428	431	YFRY	647.307	4.1338	0	2	0	0	0	n/a	1	Medium	0
	Mel_Na_mel	MELB	428	431	YFRY	647.307	4.0671	30	2	2	0.038	1.893	0.049	3	Medium	0.02	0.204268
	Mel_Na_mel	MELB	428	431	YFRY	647.307	4.0824	300	2	2	0.031	1.571	0.019	3	Medium	0.008	0.507433
	Mel_Na_mel	MELB	428	431	YFRY	647.307	4.0808	3000	2	2	0.017	0.844	0.01	3	Medium	0.004	0.567683
	Mel_Na_mel	MELB	431	434	YYRL	613.322	4.1021	0	2	0	0	0	n/a	1	High	0
	Mel_Na_mel	MELB	431	434	YYRL	613.322	4.0742	30	2	2	0.067	3.347	0.019	3	High	0.008	0.0918121
	Mel_Na_mel	MELB	431	434	YYRL	613.322	4.0559	300	2	2	0.065	3.274	0.013	3	High	0.005	0.155582
	Mel_Na_mel	MELB	431	434	YYRL	613.322	4.077	3000	2	2	0.045	2.263	0.012	3	High	0.005	0.334768
	Mel_Na_mel	MELB	438	443	MLRKIQ	787.474	1.74	0	4	0	0	0	n/a	1	Medium	0
	Mel_Na_mel	MELB	438	443	MLRKIQ	787.474	1.7534	30	4	3.988	0.207	5.18	0.153	3	Medium	0.062	0.685601
	Mel_Na_mel	MELB	438	443	MLRKIQ	787.474	1.7544	300	4	4	0.313	7.82	0.281	3	Medium	0.113	0.121438
	Mel_Na_mel	MELB	438	443	MLRKIQ	787.474	1.8022	3000	4	4	0.702	17.554	0.665	3	Medium	0.268	0.0286231
	Mel_Na_mel	MELB	440	447	RKIQIHLL	1019.66	4.2179	0	6	0	0	0	n/a	1	High	0
	Mel_Na_mel	MELB	440	447	RKIQIHLL	1019.66	4.1786	30	6	5.929	0.162	2.704	0.119	3	Medium	0.048	0.0100343
	Mel_Na_mel	MELB	440	447	RKIQIHLL	1019.66	4.1741	300	6	6	0.428	7.132	0.314	3	Medium	0.126	0.0167007
	Mel_Na_mel	MELB	440	447	RKIQIHLL	1019.66	4.178	3000	6	6	1.386	23.105	0.2	3	Medium	0.081	0.00986783
	Mel_Na_mel	MELB	442	447	IQIHLL	735.464	6.4598	0	4	0	0	0	n/a	1	Medium	0
	Mel_Na_mel	MELB	442	447	IQIHLL	735.464	6.4134	30	4	3.941	0.071	1.776	0.016	3	Medium	0.006	0.00306059
	Mel_Na_mel	MELB	442	447	IQIHLL	735.464	6.3745	300	4	4	0.218	5.458	0.303	3	Medium	0.122	0.0928936
	Mel_Na_mel	MELB	442	447	IQIHLL	735.464	6.3544	3000	4	4	0.838	20.945	0.547	3	Medium	0.22	0.0262323
	Mel_Na_mel	MELB	444	447	IHLL	494.322	4.8908	0	2	0	0	0	n/a	1	Medium	0
	Mel_Na_mel	MELB	444	447	IHLL	494.322	4.8182	30	2	1.946	0.055	2.75	0.011	3	Medium	0.005	0.0023896
	Mel_Na_mel	MELB	444	447	IHLL	494.322	4.8479	300	2	2	0.156	7.78	0.122	3	Medium	0.049	0.0376347
	Mel_Na_mel	MELB	444	447	IHLL	494.322	4.8726	3000	2	2	0.5	25.025	0.082	3	Medium	0.033	0.0321106
	Mel_Na_mel	MELB	448	466	DKYRKTPPFVEQPDSPAIS	2174.1	3.4503	0	13	0	0	0	n/a	1	Medium	0
	Mel_Na_mel	MELB	448	466	DKYRKTPPFVEQPDSPAIS	2174.1	3.3004	30	13	12.945	6.173	47.487	0.623	3	Medium	0.251	0.0275263
	Mel_Na_mel	MELB	448	466	DKYRKTPPFVEQPDSPAIS	2174.1	3.3046	300	13	13	6.917	53.211	0.467	3	Medium	0.188	0.490687
	Mel_Na_mel	MELB	448	466	DKYRKTPPFVEQPDSPAIS	2174.1	3.3128	3000	13	13	6.516	50.121	0.25	3	Medium	0.101	0.0452813
	Mel_Na_mel	MELB	448	467	DKYRKTPPFVEQPDSPAISV	2273.17	4.536	0	14	0	0	0	n/a	1	High	0
	Mel_Na_mel	MELB	448	467	DKYRKTPPFVEQPDSPAISV	2273.17	4.4071	30	14	13.944	7.627	54.478	0.311	3	Medium	0.125	0.0419066
	Mel_Na_mel	MELB	448	467	DKYRKTPPFVEQPDSPAISV	2273.17	4.4839	300	14	14	7.729	55.208	1.356	3	Medium	0.546	0.414863
	Mel_Na_mel	MELB	448	467	DKYRKTPPFVEQPDSPAISV	2273.17	4.4757	3000	14	14	8.03	57.359	0.551	3	Medium	0.222	0.0315642
	Mel_Na_mel	MELB	450	466	YRKTPPFVEQPDSPAIS	1930.98	3.6142	0	11	0	0	0	n/a	1	High	0
	Mel_Na_mel	MELB	450	466	YRKTPPFVEQPDSPAIS	1930.98	3.5715	30	11	10.945	6.436	58.511	0.185	3	High	0.074	0.0464066
	Mel_Na_mel	MELB	450	466	YRKTPPFVEQPDSPAIS	1930.98	3.5784	300	11	11	6.636	60.33	0.579	3	High	0.233	0.957516
	Mel_Na_mel	MELB	450	466	YRKTPPFVEQPDSPAIS	1930.98	3.596	3000	11	11	6.468	58.797	0.275	3	High	0.111	0.0433755
	Mel_Na_mel	MELB	450	467	YRKTPPFVEQPDSPAISV	2030.05	4.7403	0	12	0	0	0	n/a	1	Medium	0
	Mel_Na_mel	MELB	450	467	YRKTPPFVEQPDSPAISV	2030.05	4.7158	30	12	11.944	7.267	60.557	0.337	3	High	0.136	0.0881395
	Mel_Na_mel	MELB	450	467	YRKTPPFVEQPDSPAISV	2030.05	4.7098	300	12	12	7.465	62.205	0.736	3	High	0.296	0.922814
	Mel_Na_mel	MELB	450	467	YRKTPPFVEQPDSPAISV	2030.05	4.6975	3000	12	12	7.296	60.797	0.185	3	High	0.075	0.0155037
	Mel_Na_mel	MELB	450	468	YRKTPPFVEQPDSPAISVV	2129.12	5.1263	0	13	0	0	0	n/a	1	High	0
	Mel_Na_mel	MELB	450	468	YRKTPPFVEQPDSPAISVV	2129.12	5.0831	30	13	12.868	7.967	61.285	0.359	3	High	0.145	0.0367924
	Mel_Na_mel	MELB	450	468	YRKTPPFVEQPDSPAISVV	2129.12	5.0172	300	13	13	8.189	62.992	0.767	3	High	0.309	0.913494
	Mel_Na_mel	MELB	450	468	YRKTPPFVEQPDSPAISVV	2129.12	5.0257	3000	13	13	8.032	61.781	0.244	3	High	0.098	0.0325179
	Mel_Na_mel	MELB	450	469	YRKTPPFVEQPDSPAISVVA	2200.15	4.8567	0	14	0	0	0	n/a	1	High	0
	Mel_Na_mel	MELB	450	469	YRKTPPFVEQPDSPAISVVA	2200.15	4.786	30	14	13.868	8.162	58.302	0.705	3	Medium	0.284	0.102728
	Mel_Na_mel	MELB	450	469	YRKTPPFVEQPDSPAISVVA	2200.15	4.7824	300	14	14	8.414	60.1	0.868	3	Medium	0.35	0.480364
	Mel_Na_mel	MELB	450	469	YRKTPPFVEQPDSPAISVVA	2200.15	4.7803	3000	14	14	8.316	59.401	0.287	3	Medium	0.116	0.0176687
Mel	Mel_mel	MELB	1	8	SISMTTKL	879.474	4.2284	0	6	0	0	0	n/a	1	High	0
	Mel_mel	MELB	1	8	SISMTTKL	879.474	4.1952	30	6	5.998	2.142	35.697	0.124	3	Medium	0.05	0.0750588
	Mel_mel	MELB	1	8	SISMTTKL	879.474	4.1718	300	6	6	1.997	33.282	0.4	3	Medium	0.161	0.0413947
	Mel_mel	MELB	1	8	SISMTTKL	879.474	4.1733	3000	6	6	2.245	37.416	0.173	3	Medium	0.07	0.133744
	Mel_mel	MELB	1	9	SISMTTKLS	966.506	3.3167	0	7	0	0	0	n/a	1	High	0
	Mel_mel	MELB	1	9	SISMTTKLS	966.506	3.2787	30	7	6.998	2.443	34.894	0.156	3	Medium	0.063	0.660443
	Mel_mel	MELB	1	9	SISMTTKLS	966.506	3.3053	300	7	7	2.346	33.515	0.258	3	Medium	0.104	0.0212685
	Mel_mel	MELB	1	9	SISMTTKLS	966.506	3.3022	3000	7	7	2.814	40.2	0.553	3	Medium	0.222	0.278495
	Mel_mel	MELB	6	14	TKLSYGFGA	942.481	4.7218	0	7	0	0	0	n/a	1	High	0
	Mel_mel	MELB	6	14	TKLSYGFGA	942.481	4.6959	30	7	6.998	0.147	2.102	0.073	3	High	0.03	0.521138
	Mel_mel	MELB	6	14	TKLSYGFGA	942.481	4.6805	300	7	7	0.126	1.793	0.133	3	High	0.054	0.0156886
	Mel_mel	MELB	6	14	TKLSYGFGA	942.481	4.6727	3000	7	7	0.334	4.767	0.118	3	Medium	0.048	0.331875
	Mel_mel	MELB	11	18	GFGAFGKD	797.371	4.3908	0	6	0	0	0	n/a	1	Medium	0
	Mel_mel	MELB	11	18	GFGAFGKD	797.371	4.4115	30	6	6	0.044	0.731	0.038	3	Medium	0.015	0.124825
	Mel_mel	MELB	11	18	GFGAFGKD	797.371	4.3993	300	6	6	0.081	1.355	0.026	3	Medium	0.01	0.318938
	Mel_mel	MELB	11	18	GFGAFGKD	797.371	4.403	3000	6	6	0.157	2.609	0.183	3	Medium	0.073	0.8414
	Mel_mel	MELB	12	17	FGAFGK	625.322	3.5697	0	4	0	0	0	n/a	1	Medium	0
	Mel_mel	MELB	12	17	FGAFGK	625.322	3.6274	30	4	4	0.201	5.037	0.131	3	Medium	0.053	0.24844
	Mel_mel	MELB	12	17	FGAFGK	625.322	3.6403	300	4	4	0.193	4.817	0.04	3	Medium	0.016	0.785363
	Mel_mel	MELB	12	17	FGAFGK	625.322	3.6191	3000	4	4	0.184	4.605	0.132	3	Medium	0.053	0.280397
	Mel_mel	MELB	12	18	FGAFGKD	740.349	3.8434	0	5	0	0	0	n/a	1	Medium	0
	Mel_mel	MELB	12	18	FGAFGKD	740.349	3.813	30	5	5	0.142	2.84	0.137	3	Medium	0.055	0.184418
	Mel_mel	MELB	12	18	FGAFGKD	740.349	3.8015	300	5	5	0.105	2.092	0.07	3	Medium	0.028	0.0275647
	Mel_mel	MELB	12	18	FGAFGKD	740.349	3.7993	3000	5	5	0.198	3.956	0.122	3	Medium	0.049	0.526087
	Mel_mel	MELB	15	19	FGKDF	612.291	3.5799	0	3	0	0	0	n/a	1	High	0
	Mel_mel	MELB	15	19	FGKDF	612.291	3.5692	30	3	2.999	0.044	1.459	0.019	3	High	0.008	0.621591
	Mel_mel	MELB	15	19	FGKDF	612.291	3.5535	300	3	3	0.152	5.061	0.114	3	High	0.046	0.00432603
	Mel_mel	MELB	15	19	FGKDF	612.291	3.5766	3000	3	3	0.414	13.802	0.085	3	Medium	0.034	0.229801
	Mel_mel	MELB	20	26	AIGIVYM	765.409	7.0083	0	5	0	0	0	n/a	1	Medium	0
	Mel_mel	MELB	20	26	AIGIVYM	765.409	7.025	30	5	4.868	0.022	0.436	0.056	3	Medium	0.023	0.822598
	Mel_mel	MELB	20	26	AIGIVYM	765.409	6.9612	300	5	5	0.189	3.789	0.055	3	Medium	0.022	0.0360073
	Mel_mel	MELB	20	26	AIGIVYM	765.409	6.9523	3000	5	5	0.967	19.342	0.223	3	Medium	0.09	0.2635
	Mel_mel	MELB	23	25	IVY	393.226	3.2056	0	1	0	0	0	n/a	1	Medium	0
	Mel_mel	MELB	23	25	IVY	393.226	3.1843	30	1	0.999	0.002	0.222	0.003	3	Medium	0.001	0.492125
	Mel_mel	MELB	23	25	IVY	393.226	3.1576	300	1	1	0.031	3.13	0.062	3	Medium	0.025	0.0904885
	Mel_mel	MELB	23	25	IVY	393.226	3.1581	3000	1	1	0.099	9.911	0.072	3	Medium	0.029	0.251584
	Mel_mel	MELB	23	28	IVYMYL	800.414	8.4439	0	4	0	0	0	n/a	1	High	0
	Mel_mel	MELB	23	28	IVYMYL	800.414	8.4286	30	4	3.994	0.002	0.051	0.016	3	High	0.007	0.443983
	Mel_mel	MELB	23	28	IVYMYL	800.414	8.4236	300	4	4	0.012	0.306	0.003	3	High	0.001	0.0533457
	Mel_mel	MELB	23	28	IVYMYL	800.414	8.4283	3000	4	4	0.117	2.915	0.038	3	High	0.015	0.772244
	Mel_mel	MELB	26	28	MYL	425.198	5.5581	0	1	0	0	0	n/a	1	High	0
	Mel_mel	MELB	26	28	MYL	425.198	5.5012	30	1	0.995	0.003	0.326	0.006	3	High	0.002	0.179224
	Mel_mel	MELB	26	28	MYL	425.198	5.4945	300	1	1	0.006	0.609	0.004	3	High	0.002	0.0150013
	Mel_mel	MELB	26	28	MYL	425.198	5.4513	3000	1	1	0.003	0.289	0.004	3	Medium	0.001	0.794658
	Mel_mel	MELB	29	31	MYY	475.178	4.2235	0	1	0	0	0	n/a	1	Medium	0
	Mel_mel	MELB	29	31	MYY	475.178	4.1336	30	1	1	0.005	0.485	0.017	3	Medium	0.007	0.154471
	Mel_mel	MELB	29	31	MYY	475.178	4.1151	300	1	1	0.022	2.233	0.013	3	Medium	0.005	0.268961
	Mel_mel	MELB	29	31	MYY	475.178	4.1507	3000	1	1	0.021	2.107	0.086	3	Medium	0.035	0.518331
	Mel_mel	MELB	29	34	MYYYTD	854.316	4.5688	0	4	0	0	0	n/a	1	High	0
	Mel_mel	MELB	29	34	MYYYTD	854.316	4.5916	30	4	4	0.012	0.291	0.077	3	High	0.031	0.270133
	Mel_mel	MELB	29	34	MYYYTD	854.316	4.5265	300	4	4	0.043	1.063	0.021	3	High	0.009	0.00290493
	Mel_mel	MELB	29	34	MYYYTD	854.316	4.5809	3000	4	4	0.08	2.003	0.004	3	High	0.002	0.655898
	Mel_mel	MELB	35	46	VVGLSVGLVGTL	1112.68	8.2186	0	10	0	0	0	n/a	1	Medium	0
	Mel_mel	MELB	35	46	VVGLSVGLVGTL	1112.68	8.2197	30	10	9.885	0.581	5.805	0.425	3	Medium	0.171	0.0939098
	Mel_mel	MELB	35	46	VVGLSVGLVGTL	1112.68	8.2397	300	10	10	0.688	6.884	0.107	3	Medium	0.043	0.754504
	Mel_mel	MELB	35	46	VVGLSVGLVGTL	1112.68	8.1836	3000	10	10	1	9.998	0.105	3	Medium	0.042	0.0429464
	Mel_mel	MELB	42	46	LVGTL	501.316	3.9808	0	3	0	0	0	n/a	1	Medium	0
	Mel_mel	MELB	42	46	LVGTL	501.316	3.9709	30	3	2.999	0.008	0.257	0.008	3	Medium	0.003	0.977524
	Mel_mel	MELB	42	46	LVGTL	501.316	3.9859	300	3	3	0.017	0.566	0.007	3	Medium	0.003	0.250865
	Mel_mel	MELB	42	46	LVGTL	501.316	3.9717	3000	3	3	0.029	0.963	0.012	3	Medium	0.005	0.402907
	Mel_mel	MELB	45	48	TLFL	492.295	7.4907	0	2	0	0	0	n/a	1	Medium	0
	Mel_mel	MELB	45	48	TLFL	492.295	7.3988	30	2	1.994	0.003	0.129	0.011	3	Medium	0.004	0.98918
	Mel_mel	MELB	45	48	TLFL	492.295	7.4166	300	2	2	0.003	0.159	0.034	3	Medium	0.014	0.728512
	Mel_mel	MELB	45	48	TLFL	492.295	7.4598	3000	2	2	0.004	0.185	0.053	3	Medium	0.021	0.496971
	Mel_mel	MELB	47	51	FLVAR	604.37	2.6827	0	3	0	0	0	n/a	1	Medium	0
	Mel_mel	MELB	47	51	FLVAR	604.37	2.6886	30	3	2.888	0.014	0.481	0.02	3	High	0.008	0.503376
	Mel_mel	MELB	47	51	FLVAR	604.37	2.6895	300	3	3	0.013	0.442	0.012	3	High	0.005	0.204504
	Mel_mel	MELB	47	51	FLVAR	604.37	2.7247	3000	3	3	0.004	0.124	0.013	3	High	0.005	0.051454
	Mel_mel	MELB	47	53	FLVARIW	903.533	7.7147	0	5	0	0	0	n/a	1	High	0
	Mel_mel	MELB	47	53	FLVARIW	903.533	7.66	30	5	4.867	0.019	0.377	0.016	3	High	0.007	0.612482
	Mel_mel	MELB	47	53	FLVARIW	903.533	7.6378	300	5	5	0.024	0.489	0.01	3	High	0.004	0.0809794
	Mel_mel	MELB	47	53	FLVARIW	903.533	7.6393	3000	5	5	0.026	0.517	0.004	3	High	0.002	0.362891
	Mel_mel	MELB	48	53	LVARIW	756.465	5.7224	0	4	0	0	0	n/a	1	High	0
	Mel_mel	MELB	48	53	LVARIW	756.465	5.7007	30	4	3.979	0.015	0.363	0.009	3	Medium	0.004	0.933835
	Mel_mel	MELB	48	53	LVARIW	756.465	5.7051	300	4	4	0.02	0.491	0.012	3	Medium	0.005	0.970883
	Mel_mel	MELB	48	53	LVARIW	756.465	5.7096	3000	4	4	0.019	0.463	0.012	3	Medium	0.005	0.357769
	Mel_mel	MELB	49	53	VARIW	643.381	4.7377	0	3	0	0	0	n/a	1	High	0
	Mel_mel	MELB	49	53	VARIW	643.381	4.7067	30	3	2.979	0.022	0.742	0.037	3	Medium	0.015	0.886815
	Mel_mel	MELB	49	53	VARIW	643.381	4.7017	300	3	3	0.025	0.827	0.005	3	High	0.002	0.266352
	Mel_mel	MELB	49	53	VARIW	643.381	4.6974	3000	3	3	0.029	0.98	0.028	3	High	0.011	0.223474
	Mel_mel	MELB	52	61	IWDAINDPIM	1186.57	8.1592	0	7	0	0	0	n/a	1	High	0
	Mel_mel	MELB	52	61	IWDAINDPIM	1186.57	8.1358	30	7	6.817	0.046	0.662	0.009	3	High	0.004	0.973401
	Mel_mel	MELB	52	61	IWDAINDPIM	1186.57	8.1191	300	7	7	0.05	0.709	0.011	3	High	0.004	0.0407437
	Mel_mel	MELB	52	61	IWDAINDPIM	1186.57	8.1241	3000	7	7	0.09	1.279	0.016	3	High	0.006	0.839608
	Mel_mel	MELB	52	66	IWDAINDPIMGWIVN	1755.87	10.943	0	12	0	0	0	n/a	1	High	0
	Mel_mel	MELB	52	66	IWDAINDPIMGWIVN	1755.87	10.8797	30	12	11.617	0.084	0.701	0.032	3	High	0.013	0.688373
	Mel_mel	MELB	52	66	IWDAINDPIMGWIVN	1755.87	10.8709	300	12	12	0.097	0.811	0.023	3	High	0.009	0.101736
	Mel_mel	MELB	52	66	IWDAINDPIMGWIVN	1755.87	10.8765	3000	12	12	0.244	2.034	0.006	3	High	0.003	0.564596
	Mel_mel	MELB	54	65	DAINDPIMGWIV	1342.66	10.5697	0	9	0	0	0	n/a	1	High	0
	Mel_mel	MELB	54	65	DAINDPIMGWIV	1342.66	10.5384	30	9	8.617	0.065	0.722	0.023	3	High	0.009	0.449158
	Mel_mel	MELB	54	65	DAINDPIMGWIV	1342.66	10.5115	300	9	9	0.073	0.807	0.003	3	High	0.001	0.0726852
	Mel_mel	MELB	54	65	DAINDPIMGWIV	1342.66	10.5433	3000	9	9	0.128	1.418	0.022	3	High	0.009	0.597859
	Mel_mel	MELB	58	65	DPIMGWIV	929.468	9.8469	0	6	0	0	0	n/a	1	High	0
	Mel_mel	MELB	58	65	DPIMGWIV	929.468	9.8076	30	6	5.653	0.056	0.94	0.076	3	High	0.031	0.393455
	Mel_mel	MELB	58	65	DPIMGWIV	929.468	9.8066	300	6	6	0.043	0.714	0.012	3	High	0.005	0.213904
	Mel_mel	MELB	58	65	DPIMGWIV	929.468	9.8064	3000	6	6	0.058	0.97	0.022	3	High	0.009	0.879746
	Mel_mel	MELB	67	76	ATRSRWGKFK	1235.69	1.782	0	8	0	0	0	n/a	1	Medium	0
	Mel_mel	MELB	67	76	ATRSRWGKFK	1235.69	1.79	30	8	8	0.403	5.04	0.162	3	Medium	0.065	0.01094
	Mel_mel	MELB	67	76	ATRSRWGKFK	1235.69	1.8293	300	8	8	0.26	3.245	0.183	3	Medium	0.074	0.169044
	Mel_mel	MELB	67	76	ATRSRWGKFK	1235.69	1.8694	3000	8	8	0.609	7.617	0.108	3	Medium	0.043	0.202002
	Mel_mel	MELB	70	76	SRWGKFK	907.503	2.2042	0	5	0	0	0	n/a	1	Medium	0
	Mel_mel	MELB	70	76	SRWGKFK	907.503	2.2401	30	5	5	0.121	2.427	0.055	3	Medium	0.022	0.162439
	Mel_mel	MELB	70	76	SRWGKFK	907.503	2.2325	300	5	5	0.089	1.775	0.101	3	Medium	0.041	0.722673
	Mel_mel	MELB	70	76	SRWGKFK	907.503	2.3048	3000	5	5	0.216	4.322	0.145	3	Medium	0.058	0.175714
	Mel_mel	MELB	72	76	WGKFK	664.37	2.7275	0	3	0	0	0	n/a	1	Medium	0
	Mel_mel	MELB	72	76	WGKFK	664.37	2.7099	30	3	3	0.098	3.267	0.036	3	Medium	0.015	0.0325672
	Mel_mel	MELB	72	76	WGKFK	664.37	2.7196	300	3	3	0.079	2.624	0.125	3	Medium	0.05	0.100286
	Mel_mel	MELB	72	76	WGKFK	664.37	2.7905	3000	3	3	0.252	8.387	0.101	3	Medium	0.041	0.867159
	Mel_mel	MELB	75	80	FKPWIL	802.474	8.3898	0	3	0	0	0	n/a	1	High	0
	Mel_mel	MELB	75	80	FKPWIL	802.474	8.3475	30	3	2.845	0.033	1.094	0.015	3	High	0.006	0.44444
	Mel_mel	MELB	75	80	FKPWIL	802.474	8.3508	300	3	3	0.039	1.306	0.019	3	High	0.008	0.109959
	Mel_mel	MELB	75	80	FKPWIL	802.474	8.304	3000	3	3	0.206	6.882	0.066	3	Medium	0.027	0.972293
	Mel_mel	MELB	81	88	IGTLTNSL	817.455	5.0497	0	6	0	0	0	n/a	1	Medium	0
	Mel_mel	MELB	81	88	IGTLTNSL	817.455	5.0161	30	6	5.999	0.027	0.456	0.019	3	High	0.008	0.226737
	Mel_mel	MELB	81	88	IGTLTNSL	817.455	5.0018	300	6	6	0.035	0.579	0.019	3	High	0.007	0.0683578
	Mel_mel	MELB	81	88	IGTLTNSL	817.455	4.9973	3000	6	6	0.089	1.483	0.034	3	High	0.014	0.827751
	Mel_mel	MELB	81	90	IGTLTNSLVL	1029.61	7.267	0	8	0	0	0	n/a	1	Medium	0
	Mel_mel	MELB	81	90	IGTLTNSLVL	1029.61	7.2651	30	8	7.855	0.019	0.243	0.009	3	Medium	0.004	0.0334731
	Mel_mel	MELB	81	90	IGTLTNSLVL	1029.61	7.3308	300	8	8	0.036	0.45	0.011	3	Medium	0.004	0.130519
	Mel_mel	MELB	81	90	IGTLTNSLVL	1029.61	7.2682	3000	8	8	0.072	0.896	0.007	3	Medium	0.003	0.828537
	Mel_mel	MELB	92	98	LLFSAHL	799.459	6.7833	0	5	0	0	0	n/a	1	Medium	0
	Mel_mel	MELB	92	98	LLFSAHL	799.459	6.7588	30	5	4.998	0.016	0.313	0.166	3	Medium	0.067	0.87766
	Mel_mel	MELB	92	98	LLFSAHL	799.459	6.7452	300	5	5	0.014	0.288	0.046	3	Medium	0.018	0.198847
	Mel_mel	MELB	92	98	LLFSAHL	799.459	6.7362	3000	5	5	0.071	1.416	0.062	3	Medium	0.025	0.16119
	Mel_mel	MELB	93	99	LFSAHLF	833.444	7.2355	0	5	0	0	0	n/a	1	Medium	0
	Mel_mel	MELB	93	99	LFSAHLF	833.444	7.177	30	5	4.998	0.033	0.661	0.016	3	Medium	0.006	0.0356827
	Mel_mel	MELB	93	99	LFSAHLF	833.444	7.1801	300	5	5	0.031	0.617	0.033	3	Medium	0.013	0.0166409
	Mel_mel	MELB	93	99	LFSAHLF	833.444	7.1751	3000	5	5	0.056	1.113	0.087	3	Medium	0.035	0.428344
	Mel_mel	MELB	94	99	FSAHLF	720.36	6.1753	0	4	0	0	0	n/a	1	High	0
	Mel_mel	MELB	94	99	FSAHLF	720.36	6.1432	30	4	3.998	0.028	0.688	0.01	3	Medium	0.004	0.322005
	Mel_mel	MELB	94	99	FSAHLF	720.36	6.1221	300	4	4	0.038	0.945	0.019	3	Medium	0.008	0.0516965
	Mel_mel	MELB	94	99	FSAHLF	720.36	6.1049	3000	4	4	0.068	1.708	0.006	3	High	0.002	0.542398
	Mel_mel	MELB	98	106	LFEGTAQVV	962.507	5.118	0	7	0	0	0	n/a	1	Medium	0
	Mel_mel	MELB	98	106	LFEGTAQVV	962.507	5.0995	30	7	6.92	0.183	2.612	0.203	3	Medium	0.082	0.126887
	Mel_mel	MELB	98	106	LFEGTAQVV	962.507	5.0923	300	7	7	0.257	3.675	0.097	3	Medium	0.039	0.0195489
	Mel_mel	MELB	98	106	LFEGTAQVV	962.507	5.098	3000	7	7	0.397	5.666	0.079	3	Medium	0.032	0.00390071
	Mel_mel	MELB	100	106	EGTAQVV	702.355	2.2568	0	5	0	0	0	n/a	1	Medium	0
	Mel_mel	MELB	100	106	EGTAQVV	702.355	2.2577	30	5	4.92	0.067	1.34	0.275	3	Medium	0.111	0.53429
	Mel_mel	MELB	100	106	EGTAQVV	702.355	2.2537	300	5	5	0.107	2.14	0.077	3	Medium	0.031	0.610699
	Mel_mel	MELB	100	106	EGTAQVV	702.355	2.273	3000	5	5	0.31	6.196	0.055	3	Medium	0.022	0.000875967
	Mel_mel	MELB	100	109	EGTAQVVFVC	1051.5	6.4519	0	8	0	0	0	n/a	1	High	0
	Mel_mel	MELB	100	109	EGTAQVVFVC	1051.5	6.4069	30	8	7.903	0.111	1.388	0.228	3	Medium	0.092	0.174703
	Mel_mel	MELB	100	109	EGTAQVVFVC	1051.5	6.3846	300	8	8	0.101	1.261	0.062	3	High	0.025	0.411488
	Mel_mel	MELB	100	109	EGTAQVVFVC	1051.5	6.3887	3000	8	8	0.224	2.799	0.05	3	High	0.02	0.0465336
	Mel_mel	MELB	119	122	YTIM	526.246	4.8279	0	2	0	0	0	n/a	1	High	0
	Mel_mel	MELB	119	122	YTIM	526.246	4.7953	30	2	1.995	0.014	0.713	0.003	3	High	0.001	0.997191
	Mel_mel	MELB	119	122	YTIM	526.246	4.7784	300	2	2	0.021	1.04	0.007	3	High	0.003	0.0332972
	Mel_mel	MELB	119	122	YTIM	526.246	4.7805	3000	2	2	0.03	1.479	0.014	3	High	0.006	0.972317
	Mel_mel	MELB	120	129	TIMDIPFWSL	1221.61	11.5535	0	7	0	0	0	n/a	1	High	0
	Mel_mel	MELB	120	129	TIMDIPFWSL	1221.61	11.5075	30	7	6.889	0.044	0.622	0.05	3	High	0.02	0.704542
	Mel_mel	MELB	120	129	TIMDIPFWSL	1221.61	11.5062	300	7	7	0.077	1.102	0.008	3	High	0.003	0.0629381
	Mel_mel	MELB	120	129	TIMDIPFWSL	1221.61	11.496	3000	7	7	0.154	2.198	0.034	3	High	0.014	0.70959
	Mel_mel	MELB	123	129	DIPFWSL	876.438	10.3845	0	4	0	0	0	n/a	1	Medium	0
	Mel_mel	MELB	123	129	DIPFWSL	876.438	10.4109	30	4	3.997	0.034	0.85	0.01	3	Medium	0.004	0.0634773
	Mel_mel	MELB	123	129	DIPFWSL	876.438	10.4032	300	4	4	0.041	1.03	0.012	3	Medium	0.005	0.0714543
	Mel_mel	MELB	123	129	DIPFWSL	876.438	10.3325	3000	4	4	0.062	1.542	0.009	3	Medium	0.004	0.921769
	Mel_mel	MELB	124	129	IPFWSL	761.411	10.0469	0	4	0	0	0	n/a	1	High	0
	Mel_mel	MELB	124	129	IPFWSL	761.411	9.9658	30	4	3.997	0.031	0.783	0.008	3	High	0.003	0.449005
	Mel_mel	MELB	124	129	IPFWSL	761.411	9.9724	300	4	4	0.048	1.202	0.019	3	High	0.008	0.0724693
	Mel_mel	MELB	124	129	IPFWSL	761.411	9.9565	3000	4	4	0.107	2.665	0.009	3	High	0.004	0.75133
	Mel_mel	MELB	130	135	VPTITL	642.395	6.0491	0	4	0	0	0	n/a	1	Medium	0
	Mel_mel	MELB	130	135	VPTITL	642.395	6.0444	30	4	3.994	0.07	1.743	0.033	3	Medium	0.013	0.0803912
	Mel_mel	MELB	130	135	VPTITL	642.395	6.0526	300	4	4	0.056	1.391	0.017	3	Medium	0.007	0.584895
	Mel_mel	MELB	130	135	VPTITL	642.395	6.0395	3000	4	4	0.153	3.823	0.232	3	Medium	0.093	0.339078
	Mel_mel	MELB	130	137	VPTITLDK	885.517	3.6374	0	6	0	0	0	n/a	1	Medium	0
	Mel_mel	MELB	130	137	VPTITLDK	885.517	3.6058	30	6	5.994	0.437	7.275	0.152	3	Medium	0.061	0.0134167
	Mel_mel	MELB	130	137	VPTITLDK	885.517	3.6016	300	6	6	0.224	3.741	0.263	3	Medium	0.106	0.178637
	Mel_mel	MELB	130	137	VPTITLDK	885.517	3.6049	3000	6	6	0.591	9.847	0.161	3	Medium	0.065	0.185104
	Mel_mel	MELB	136	149	DKREREQLVPFPRF	1815.97	5.9509	0	10	0	0	0	n/a	1	High	0
	Mel_mel	MELB	136	149	DKREREQLVPFPRF	1815.97	5.8767	30	10	9.885	0.325	3.251	0.085	3	High	0.034	0.0423614
	Mel_mel	MELB	136	149	DKREREQLVPFPRF	1815.97	5.8256	300	10	10	0.386	3.856	0.563	3	High	0.226	0.0367494
	Mel_mel	MELB	136	149	DKREREQLVPFPRF	1815.97	5.7957	3000	10	10	1.181	11.808	0.446	3	Medium	0.18	0.206259
	Mel_mel	MELB	138	149	REREQLVPFPRF	1572.85	6.1247	0	8	0	0	0	n/a	1	High	0
	Mel_mel	MELB	138	149	REREQLVPFPRF	1572.85	6.0293	30	8	7.885	0.229	2.866	0.043	3	Medium	0.017	0.0306004
	Mel_mel	MELB	138	149	REREQLVPFPRF	1572.85	6.0233	300	8	8	0.237	2.964	0.141	3	High	0.057	0.0116374
	Mel_mel	MELB	138	149	REREQLVPFPRF	1572.85	6.0188	3000	8	8	0.65	8.122	0.352	3	Medium	0.142	0.266
	Mel_mel	MELB	139	149	EREQLVPFPRF	1416.75	6.9006	0	7	0	0	0	n/a	1	Medium	0
	Mel_mel	MELB	139	149	EREQLVPFPRF	1416.75	6.7759	30	7	6.885	0.246	3.509	0.002	3	Medium	0.001	0.0235019
	Mel_mel	MELB	139	149	EREQLVPFPRF	1416.75	6.7921	300	7	7	0.271	3.878	0.131	3	Medium	0.053	0.00451209
	Mel_mel	MELB	139	149	EREQLVPFPRF	1416.75	6.7797	3000	7	7	0.754	10.765	0.409	3	Medium	0.164	0.112332
	Mel_mel	MELB	139	150	EREQLVPFPRFF	1563.82	8.3578	0	8	0	0	0	n/a	1	Medium	0
	Mel_mel	MELB	139	150	EREQLVPFPRFF	1563.82	8.3063	30	8	7.885	0.251	3.14	0.01	3	Medium	0.004	0.0828695
	Mel_mel	MELB	139	150	EREQLVPFPRFF	1563.82	8.3522	300	8	8	0.271	3.392	0.174	3	Medium	0.07	0.00342045
	Mel_mel	MELB	139	150	EREQLVPFPRFF	1563.82	8.3567	3000	8	8	0.714	8.92	0.379	3	Medium	0.152	0.0359525
	Mel_mel	MELB	140	149	REQLVPFPRF	1287.71	6.8223	0	6	0	0	0	n/a	1	High	0
	Mel_mel	MELB	140	149	REQLVPFPRF	1287.71	6.7288	30	6	5.885	0.154	2.559	0.037	3	Medium	0.015	0.166675
	Mel_mel	MELB	140	149	REQLVPFPRF	1287.71	6.7364	300	6	6	0.188	3.134	0.091	3	High	0.037	0.0170977
	Mel_mel	MELB	140	149	REQLVPFPRF	1287.71	6.7352	3000	6	6	0.531	8.857	0.335	3	Medium	0.135	0.0875383
	Mel_mel	MELB	141	149	EQLVPFPRF	1131.61	7.752	0	5	0	0	0	n/a	1	Medium	0
	Mel_mel	MELB	141	149	EQLVPFPRF	1131.61	7.6687	30	5	4.885	0.175	3.507	0.02	3	Medium	0.008	0.0323079
	Mel_mel	MELB	141	149	EQLVPFPRF	1131.61	7.665	300	5	5	0.189	3.772	0.107	3	Medium	0.043	0.00833667
	Mel_mel	MELB	141	149	EQLVPFPRF	1131.61	7.6614	3000	5	5	0.518	10.359	0.273	3	Medium	0.11	0.151306
	Mel_mel	MELB	141	150	EQLVPFPRFF	1278.68	9.3429	0	6	0	0	0	n/a	1	High	0
	Mel_mel	MELB	141	150	EQLVPFPRFF	1278.68	9.2732	30	6	5.885	0.173	2.89	0.013	3	Medium	0.005	0.0386279
	Mel_mel	MELB	141	150	EQLVPFPRFF	1278.68	9.2744	300	6	6	0.19	3.165	0.081	3	Medium	0.033	0.00953989
	Mel_mel	MELB	141	150	EQLVPFPRFF	1278.68	9.2374	3000	6	6	0.562	9.365	0.423	3	Medium	0.17	0.246157
	Mel_mel	MELB	142	149	QLVPFPRF	1002.57	7.6458	0	4	0	0	0	n/a	1	High	0
	Mel_mel	MELB	142	149	QLVPFPRF	1002.57	7.6155	30	4	3.885	0.098	2.458	0.022	3	High	0.009	0.0137984
	Mel_mel	MELB	142	149	QLVPFPRF	1002.57	7.581	300	4	4	0.12	3.001	0.11	3	High	0.044	0.0300184
	Mel_mel	MELB	142	149	QLVPFPRF	1002.57	7.6045	3000	4	4	0.359	8.981	0.203	3	Medium	0.082	0.418627
	Mel_mel	MELB	143	149	LVPFPRF	874.506	7.4483	0	3	0	0	0	n/a	1	Medium	0
	Mel_mel	MELB	143	149	LVPFPRF	874.506	7.3779	30	3	2.997	0.081	2.704	0.022	3	Medium	0.009	0.0424404
	Mel_mel	MELB	143	149	LVPFPRF	874.506	7.4399	300	3	3	0.094	3.118	0.074	3	Medium	0.03	0.0323714
	Mel_mel	MELB	143	149	LVPFPRF	874.506	7.3005	3000	3	3	0.278	9.265	0.177	3	Medium	0.071	0.390055
	Mel_mel	MELB	150	155	FASLAG	564.291	3.6697	0	4	0	0	0	n/a	1	Medium	0
	Mel_mel	MELB	150	155	FASLAG	564.291	3.6608	30	4	4	0.102	2.554	0.116	3	Medium	0.047	0.0542642
	Mel_mel	MELB	150	155	FASLAG	564.291	3.6473	300	4	4	0.288	7.188	0.082	3	Medium	0.033	0.0186119
	Mel_mel	MELB	150	155	FASLAG	564.291	3.6561	3000	4	4	0.56	13.993	0.168	3	Medium	0.068	0.0821578
	Mel_mel	MELB	153	158	LAGFVT	606.338	5.0443	0	4	0	0	0	n/a	1	Medium	0
	Mel_mel	MELB	153	158	LAGFVT	606.338	4.9753	30	4	3.983	0.058	1.46	0.018	3	Medium	0.007	0.0105969
	Mel_mel	MELB	153	158	LAGFVT	606.338	4.9395	300	4	4	0.117	2.925	0.033	3	Medium	0.013	0.0169674
	Mel_mel	MELB	153	158	LAGFVT	606.338	4.9366	3000	4	4	0.553	13.835	0.128	3	Medium	0.052	0.871814
	Mel_mel	MELB	154	168	AGFVTAGITLPFVSY	1541.81	9.8362	0	12	0	0	0	n/a	1	High	0
	Mel_mel	MELB	154	168	AGFVTAGITLPFVSY	1541.81	9.7553	30	12	11.956	0.222	1.85	0.037	3	High	0.015	0.135627
	Mel_mel	MELB	154	168	AGFVTAGITLPFVSY	1541.81	9.7849	300	12	12	0.271	2.255	0.106	3	High	0.042	0.0260172
	Mel_mel	MELB	154	168	AGFVTAGITLPFVSY	1541.81	9.7555	3000	12	12	0.6	4.998	0.404	3	Medium	0.162	0.110675
	Mel_mel	MELB	156	163	FVTAGITL	820.47	6.8511	0	6	0	0	0	n/a	1	Medium	0
	Mel_mel	MELB	156	163	FVTAGITL	820.47	6.8267	30	6	5.992	0.044	0.727	0.051	3	Medium	0.02	0.634363
	Mel_mel	MELB	156	163	FVTAGITL	820.47	6.8481	300	6	6	0.052	0.866	0.033	3	Medium	0.013	0.0077863
	Mel_mel	MELB	156	163	FVTAGITL	820.47	6.8308	3000	6	6	0.165	2.754	0.034	3	Medium	0.014	0.717522
	Mel_mel	MELB	157	168	VTAGITLPFVSY	1266.69	8.7686	0	9	0	0	0	n/a	1	Medium	0
	Mel_mel	MELB	157	168	VTAGITLPFVSY	1266.69	8.7293	30	9	8.973	0.122	1.354	0.044	3	Medium	0.018	0.674044
	Mel_mel	MELB	157	168	VTAGITLPFVSY	1266.69	8.7082	300	9	9	0.127	1.408	0.102	3	Medium	0.041	0.0277298
	Mel_mel	MELB	157	168	VTAGITLPFVSY	1266.69	8.7302	3000	9	9	0.365	4.058	0.218	3	Medium	0.088	0.698399
	Mel_mel	MELB	159	168	AGITLPFVSY	1066.57	8.8162	0	7	0	0	0	n/a	1	High	0
	Mel_mel	MELB	159	168	AGITLPFVSY	1066.57	8.7871	30	7	6.973	0.123	1.75	0.018	3	High	0.007	0.234683
	Mel_mel	MELB	159	168	AGITLPFVSY	1066.57	8.7958	300	7	7	0.133	1.902	0.06	3	High	0.024	0.0343597
	Mel_mel	MELB	159	168	AGITLPFVSY	1066.57	8.7855	3000	7	7	0.354	5.058	0.247	3	High	0.1	0.13895
	Mel_mel	MELB	169	180	VGGADRGFGFQM	1240.57	6.6104	0	10	0	0	0	n/a	1	Medium	0
	Mel_mel	MELB	169	180	VGGADRGFGFQM	1240.57	6.5745	30	10	10	0.167	1.672	0.062	3	Medium	0.025	0.0395717
	Mel_mel	MELB	169	180	VGGADRGFGFQM	1240.57	6.5505	300	10	10	0.121	1.213	0.085	3	Medium	0.034	0.0751772
	Mel_mel	MELB	169	180	VGGADRGFGFQM	1240.57	6.5523	3000	10	10	0.343	3.435	0.129	3	Medium	0.052	0.400615
	Mel_mel	MELB	174	180	RGFGFQM	841.39	6.5103	0	5	0	0	0	n/a	1	Medium	0
	Mel_mel	MELB	174	180	RGFGFQM	841.39	6.464	30	5	5	0.032	0.637	0.011	3	Medium	0.004	0.0867847
	Mel_mel	MELB	174	180	RGFGFQM	841.39	6.4502	300	5	5	0.03	0.605	0.01	3	Medium	0.004	0.0835118
	Mel_mel	MELB	174	180	RGFGFQM	841.39	6.4534	3000	5	5	0.062	1.249	0.04	3	Medium	0.016	0.582141
	Mel_mel	MELB	184	187	VLIA	414.284	3.3589	0	2	0	0	0	n/a	1	Medium	0
	Mel_mel	MELB	184	187	VLIA	414.284	3.3799	30	2	1.871	-0.001	-0.073	0.008	3	Medium	0.003	0.199346
	Mel_mel	MELB	184	187	VLIA	414.284	3.3441	300	2	2	0.004	0.183	0.002	3	Medium	0.001	0.605616
	Mel_mel	MELB	184	187	VLIA	414.284	3.3022	3000	2	2	-0.001	-0.027	0.007	3	Medium	0.003	0.451428
	Mel_mel	MELB	186	191	IAFFIA	680.39	8.6823	0	4	0	0	0	n/a	1	Medium	0
	Mel_mel	MELB	186	191	IAFFIA	680.39	8.6314	30	4	3.979	-0.001	-0.018	0.038	3	Medium	0.015	0.529817
	Mel_mel	MELB	186	191	IAFFIA	680.39	8.6848	300	4	4	-0.003	-0.08	0.025	3	Medium	0.01	0.441308
	Mel_mel	MELB	186	191	IAFFIA	680.39	8.6106	3000	4	4	0.014	0.34	0.003	3	Medium	0.001	0.568636
	Mel_mel	MELB	190	198	IASTIVTLR	972.597	3.9385	0	7	0	0	0	n/a	1	Medium	0
	Mel_mel	MELB	190	198	IASTIVTLR	972.597	3.8519	30	7	6.871	0.025	0.356	0.028	3	Medium	0.011	0.679515
	Mel_mel	MELB	190	198	IASTIVTLR	972.597	3.8565	300	7	7	0.039	0.557	0.032	3	Medium	0.013	0.0478935
	Mel_mel	MELB	190	198	IASTIVTLR	972.597	3.8579	3000	7	7	0.119	1.698	0.039	3	Medium	0.016	0.848024
	Mel_mel	MELB	192	198	STIVTLR	788.476	3.0198	0	5	0	0	0	n/a	1	Medium	0
	Mel_mel	MELB	192	198	STIVTLR	788.476	3.0225	30	5	4.871	0.037	0.746	0.015	3	Medium	0.006	0.617629
	Mel_mel	MELB	192	198	STIVTLR	788.476	3.0364	300	5	5	0.052	1.041	0.02	2	Medium	0.002	0.0687435
	Mel_mel	MELB	192	198	STIVTLR	788.476	3.0176	3000	5	5	0.064	1.271	0.027	3	Medium	0.011	0.757265
	Mel_mel	MELB	192	199	STIVTLRN	902.519	2.7117	0	6	0	0	0	n/a	1	Medium	0
	Mel_mel	MELB	192	199	STIVTLRN	902.519	2.5487	30	6	5.871	0.218	3.63	0.156	3	Medium	0.063	0.202612
	Mel_mel	MELB	192	199	STIVTLRN	902.519	2.6845	300	6	6	0.159	2.645	0.319	3	Medium	0.128	0.883898
	Mel_mel	MELB	192	199	STIVTLRN	902.519	2.7122	3000	6	6	0.179	2.988	0.174	3	Medium	0.07	0.377514
	Mel_mel	MELB	192	200	STIVTLRNV	1001.59	4.4955	0	7	0	0	0	n/a	1	Medium	0
	Mel_mel	MELB	192	200	STIVTLRNV	1001.59	4.4451	30	7	6.87	0.06	0.851	0.015	3	Medium	0.006	0.826654
	Mel_mel	MELB	192	200	STIVTLRNV	1001.59	4.4276	300	7	7	0.086	1.232	0.011	3	Medium	0.004	0.0372633
	Mel_mel	MELB	192	200	STIVTLRNV	1001.59	4.44	3000	7	7	0.221	3.157	0.057	3	Medium	0.023	0.327402
	Mel_mel	MELB	192	201	STIVTLRNVH	1138.65	2.8416	0	8	0	0	0	n/a	1	Medium	0
	Mel_mel	MELB	192	201	STIVTLRNVH	1138.65	2.7968	30	8	7.87	0.1	1.255	0.025	3	Medium	0.01	0.0116839
	Mel_mel	MELB	192	201	STIVTLRNVH	1138.65	2.812	300	8	8	0.073	0.915	0.02	3	Medium	0.008	0.0215142
	Mel_mel	MELB	192	201	STIVTLRNVH	1138.65	2.8469	3000	8	8	0.167	2.089	0.049	3	Medium	0.02	0.0297693
	Mel_mel	MELB	192	203	STIVTLRNVHEV	1366.76	3.9623	0	10	0	0	0	n/a	1	High	0
	Mel_mel	MELB	192	203	STIVTLRNVHEV	1366.76	3.9159	30	10	9.792	0.151	1.512	0.029	3	High	0.012	0.00382324
	Mel_mel	MELB	192	203	STIVTLRNVHEV	1366.76	3.9114	300	10	10	0.132	1.323	0.055	3	High	0.022	0.270485
	Mel_mel	MELB	192	203	STIVTLRNVHEV	1366.76	3.9148	3000	10	10	0.381	3.809	0.124	3	High	0.05	0.334219
	Mel_mel	MELB	194	197	IVTL	444.295	4.5424	0	2	0	0	0	n/a	1	Medium	0
	Mel_mel	MELB	194	197	IVTL	444.295	4.4785	30	2	1.999	0.057	2.839	0.046	3	Medium	0.019	0.249874
	Mel_mel	MELB	194	197	IVTL	444.295	4.4963	300	2	2	0.041	2.034	0.019	3	Medium	0.007	0.952129
	Mel_mel	MELB	194	197	IVTL	444.295	4.4612	3000	2	2	0.021	1.036	0.033	3	Medium	0.013	0.325252
	Mel_mel	MELB	194	198	IVTLR	600.396	2.299	0	3	0	0	0	n/a	1	Medium	0
	Mel_mel	MELB	194	198	IVTLR	600.396	2.2878	30	3	2.999	0.001	0.03	0.012	3	Medium	0.005	0.456938
	Mel_mel	MELB	194	198	IVTLR	600.396	2.291	300	3	3	0.007	0.242	0.013	3	Medium	0.005	0.109413
	Mel_mel	MELB	194	198	IVTLR	600.396	2.3402	3000	3	3	0.003	0.099	0.029	3	Medium	0.012	0.313216
	Mel_mel	MELB	194	199	IVTLRN	714.439	2.0768	0	4	0	0	0	n/a	1	Medium	0
	Mel_mel	MELB	194	199	IVTLRN	714.439	2.0523	30	4	3.999	0.014	0.357	0.063	3	Medium	0.025	0.340093
	Mel_mel	MELB	194	199	IVTLRN	714.439	2.0587	300	4	4	0.008	0.194	0.013	3	Medium	0.005	0.0101677
	Mel_mel	MELB	194	199	IVTLRN	714.439	2.072	3000	4	4	0.008	0.204	0.003	2	Medium	0	0.728726
	Mel_mel	MELB	194	200	IVTLRNV	813.507	3.9756	0	5	0	0	0	n/a	1	Medium	0
	Mel_mel	MELB	194	200	IVTLRNV	813.507	3.9319	30	5	4.999	0.054	1.078	0.105	3	Medium	0.042	0.667774
	Mel_mel	MELB	194	200	IVTLRNV	813.507	3.9417	300	5	5	0.044	0.885	0.019	3	Medium	0.008	0.0833076
	Mel_mel	MELB	194	200	IVTLRNV	813.507	3.9379	3000	5	5	0.172	3.431	0.057	3	Medium	0.023	0.489391
	Mel_mel	MELB	194	201	IVTLRNVH	950.566	2.1962	0	6	0	0	0	n/a	1	Medium	0
	Mel_mel	MELB	194	201	IVTLRNVH	950.566	2.1993	30	6	5.999	0.103	1.711	0.039	3	Medium	0.016	0.0682377
	Mel_mel	MELB	194	201	IVTLRNVH	950.566	2.1934	300	6	6	0.105	1.748	0.027	3	Medium	0.011	0.00469317
	Mel_mel	MELB	194	201	IVTLRNVH	950.566	2.25	3000	6	6	0.227	3.78	0.07	3	Medium	0.028	0.129381
	Mel_mel	MELB	194	203	IVTLRNVHEV	1178.68	3.4249	0	8	0	0	0	n/a	1	Medium	0
	Mel_mel	MELB	194	203	IVTLRNVHEV	1178.68	3.4065	30	8	7.921	0.169	2.109	0.114	3	Medium	0.046	0.0785728
	Mel_mel	MELB	194	203	IVTLRNVHEV	1178.68	3.4205	300	8	8	0.144	1.796	0.087	3	Medium	0.035	0.370824
	Mel_mel	MELB	194	203	IVTLRNVHEV	1178.68	3.4243	3000	8	8	0.406	5.078	0.248	3	Medium	0.1	0.227409
	Mel_mel	MELB	194	204	IVTLRNVHEVY	1341.74	4.1416	0	9	0	0	0	n/a	1	Medium	0
	Mel_mel	MELB	194	204	IVTLRNVHEVY	1341.74	4.1038	30	9	8.92	0.175	1.945	0.051	3	High	0.021	0.0493522
	Mel_mel	MELB	194	204	IVTLRNVHEVY	1341.74	4.0868	300	9	9	0.158	1.751	0.088	3	High	0.036	0.0670925
	Mel_mel	MELB	194	204	IVTLRNVHEVY	1341.74	4.0887	3000	9	9	0.515	5.723	0.13	3	Medium	0.052	0.0683558
	Mel_mel	MELB	208	217	NGVTAGRPHL	1020.55	2.1697	0	7	0	0	0	n/a	1	Medium	0
	Mel_mel	MELB	208	217	NGVTAGRPHL	1020.55	2.2259	30	7	6.995	0.496	7.083	0.16	3	Medium	0.065	0.0163413
	Mel_mel	MELB	208	217	NGVTAGRPHL	1020.55	2.1508	300	7	7	0.231	3.302	0.289	3	Medium	0.116	0.27605
	Mel_mel	MELB	208	217	NGVTAGRPHL	1020.55	2.2429	3000	7	7	0.449	6.408	0.336	3	Medium	0.135	0.195909
	Mel_mel	MELB	212	225	AGRPHLTLKTIVGL	1474.9	5.7772	0	11	0	0	0	n/a	1	Medium	0
	Mel_mel	MELB	212	225	AGRPHLTLKTIVGL	1474.9	5.7544	30	11	10.87	0.928	8.439	0.264	3	Medium	0.106	0.0654619
	Mel_mel	MELB	212	225	AGRPHLTLKTIVGL	1474.9	5.732	300	11	11	0.713	6.485	0.308	3	Medium	0.124	0.0125702
	Mel_mel	MELB	212	225	AGRPHLTLKTIVGL	1474.9	5.7309	3000	11	11	1.259	11.446	0.234	3	Medium	0.094	0.108021
	Mel_mel	MELB	219	225	LKTIVGL	742.495	5.0338	0	5	0	0	0	n/a	1	Medium	0
	Mel_mel	MELB	219	225	LKTIVGL	742.495	5.0216	30	5	4.87	0.255	5.095	0.041	3	Medium	0.016	0.237969
	Mel_mel	MELB	219	225	LKTIVGL	742.495	4.9871	300	5	5	0.282	5.633	0.095	3	Medium	0.038	0.195514
	Mel_mel	MELB	219	225	LKTIVGL	742.495	4.9912	3000	5	5	0.763	15.268	0.035	3	Medium	0.014	0.166076
	Mel_mel	MELB	219	227	LKTIVGLIY	1018.64	7.4528	0	7	0	0	0	n/a	1	High	0
	Mel_mel	MELB	219	227	LKTIVGLIY	1018.64	7.4009	30	7	6.738	0.22	3.141	0.072	3	Medium	0.029	0.789562
	Mel_mel	MELB	219	227	LKTIVGLIY	1018.64	7.3989	300	7	7	0.228	3.257	0.103	3	High	0.042	0.179589
	Mel_mel	MELB	219	227	LKTIVGLIY	1018.64	7.3827	3000	7	7	0.567	8.099	0.119	3	Medium	0.048	0.426046
	Mel_mel	MELB	220	225	KTIVGL	629.411	3.8592	0	4	0	0	0	n/a	1	Medium	0
	Mel_mel	MELB	220	225	KTIVGL	629.411	3.8023	30	4	3.87	0.03	0.749	0.006	3	Medium	0.002	0.000675734
	Mel_mel	MELB	220	225	KTIVGL	629.411	3.7733	300	4	4	0.042	1.042	0.014	3	Medium	0.006	0.238384
	Mel_mel	MELB	220	225	KTIVGL	629.411	3.8278	3000	4	4	0.276	6.892	0.037	3	Medium	0.015	0.740461
	Mel_mel	MELB	220	227	KTIVGLIY	905.559	6.2119	0	6	0	0	0	n/a	1	Medium	0
	Mel_mel	MELB	220	227	KTIVGLIY	905.559	6.2128	30	6	5.738	0.045	0.751	0.034	3	Medium	0.014	0.12124
	Mel_mel	MELB	220	227	KTIVGLIY	905.559	6.2193	300	6	6	0.08	1.334	0.023	3	Medium	0.009	0.569776
	Mel_mel	MELB	220	227	KTIVGLIY	905.559	6.2115	3000	6	6	0.274	4.564	0.085	3	Medium	0.034	0.867602
	Mel_mel	MELB	221	225	TIVGL	501.316	5.0915	0	3	0	0	0	n/a	1	High	0
	Mel_mel	MELB	221	225	TIVGL	501.316	5.0567	30	3	2.875	0.026	0.868	0.008	3	High	0.003	0.0301507
	Mel_mel	MELB	221	225	TIVGL	501.316	5.0621	300	3	3	0.05	1.66	0.012	3	High	0.005	0.302211
	Mel_mel	MELB	221	225	TIVGL	501.316	5.0465	3000	3	3	0.219	7.305	0.053	3	High	0.021	0.612963
	Mel_mel	MELB	222	227	IVGLIY	676.416	6.9396	0	4	0	0	0	n/a	1	Medium	0
	Mel_mel	MELB	222	227	IVGLIY	676.416	6.9415	30	4	3.867	0.026	0.643	0.018	3	Medium	0.007	0.645971
	Mel_mel	MELB	222	227	IVGLIY	676.416	6.9386	300	4	4	0.029	0.735	0.038	3	Medium	0.015	0.072492
	Mel_mel	MELB	222	227	IVGLIY	676.416	6.8783	3000	4	4	0.186	4.646	0.02	3	Medium	0.008	0.361187
	Mel_mel	MELB	226	232	IYKNDQL	892.465	2.6746	0	5	0	0	0	n/a	1	High	0
	Mel_mel	MELB	226	232	IYKNDQL	892.465	2.671	30	5	4.999	0.155	3.098	0.013	3	High	0.005	0.886743
	Mel_mel	MELB	226	232	IYKNDQL	892.465	2.6561	300	5	5	0.137	2.742	0.098	3	High	0.039	0.0115001
	Mel_mel	MELB	226	232	IYKNDQL	892.465	2.6929	3000	5	5	0.555	11.093	0.177	3	Medium	0.071	0.798445
	Mel_mel	MELB	226	235	IYKNDQLSCL	1195.59	5.2967	0	8	0	0	0	n/a	1	High	0
	Mel_mel	MELB	226	235	IYKNDQLSCL	1195.59	5.2197	30	8	7.999	0.008	0.096	0.041	3	Medium	0.016	0.0594364
	Mel_mel	MELB	226	235	IYKNDQLSCL	1195.59	5.2677	300	8	8	0.031	0.382	0.106	3	Medium	0.043	0.0627507
	Mel_mel	MELB	226	235	IYKNDQLSCL	1195.59	5.2169	3000	8	8	0.342	4.276	0.136	3	High	0.055	0.973151
	Mel_mel	MELB	230	235	DQLSCL	677.305	5.5635	0	4	0	0	0	n/a	1	Medium	0
	Mel_mel	MELB	230	235	DQLSCL	677.305	5.5189	30	4	3.999	0.038	0.956	0.027	3	Medium	0.011	0.130505
	Mel_mel	MELB	230	235	DQLSCL	677.305	5.491	300	4	4	0.056	1.396	0.021	3	Medium	0.008	0.152527
	Mel_mel	MELB	230	235	DQLSCL	677.305	5.489	3000	4	4	0.067	1.681	0.136	3	Medium	0.055	0.513393
	Mel_mel	MELB	231	235	QLSCL	562.279	5.0602	0	3	0	0	0	n/a	1	Medium	0
	Mel_mel	MELB	231	235	QLSCL	562.279	5.0093	30	3	3	-0.014	-0.466	0.077	3	Medium	0.031	0.960235
	Mel_mel	MELB	231	235	QLSCL	562.279	5.0072	300	3	3	-0.024	-0.813	0.009	3	Medium	0.004	0.179089
	Mel_mel	MELB	231	235	QLSCL	562.279	4.9901	3000	3	3	0.101	3.38	0.023	3	Medium	0.009	0.386941
	Mel_mel	MELB	236	239	LGMA	390.194	2.643	0	2	0	0	0	n/a	1	Medium	0
	Mel_mel	MELB	236	239	LGMA	390.194	2.609	30	2	2	0.046	2.3	0.02	3	Medium	0.008	0.963543
	Mel_mel	MELB	236	239	LGMA	390.194	2.6137	300	2	2	0.016	0.793	0.021	3	Medium	0.009	0.933114
	Mel_mel	MELB	236	239	LGMA	390.194	2.6098	3000	2	2	0.082	4.113	0.041	3	Medium	0.017	0.435252
	Mel_mel	MELB	240	250	LAYNIASNIIN	1204.65	6.3187	0	9	0	0	0	n/a	1	Medium	0
	Mel_mel	MELB	240	250	LAYNIASNIIN	1204.65	6.2864	30	9	8.857	0.069	0.765	0.028	3	Medium	0.011	0.194046
	Mel_mel	MELB	240	250	LAYNIASNIIN	1204.65	6.2875	300	9	9	0.062	0.685	0.083	3	Medium	0.033	0.115024
	Mel_mel	MELB	240	250	LAYNIASNIIN	1204.65	6.2782	3000	9	9	0.147	1.631	0.058	3	Medium	0.023	0.844174
	Mel_mel	MELB	242	255	YNIASNIINGFAIY	1571.8	10.0304	0	12	0	0	0	n/a	1	High	0
	Mel_mel	MELB	242	255	YNIASNIINGFAIY	1571.8	9.9983	30	12	11.818	0.077	0.642	0.045	3	Medium	0.018	0.212349
	Mel_mel	MELB	242	255	YNIASNIINGFAIY	1571.8	10.0099	300	12	12	0.069	0.572	0.024	3	Medium	0.009	0.0347142
	Mel_mel	MELB	242	255	YNIASNIINGFAIY	1571.8	9.9948	3000	12	12	0.389	3.243	0.047	3	Medium	0.019	0.147612
	Mel_mel	MELB	244	255	IASNIINGFAIY	1294.69	8.4658	0	10	0	0	0	n/a	1	High	0
	Mel_mel	MELB	244	255	IASNIINGFAIY	1294.69	8.4271	30	10	9.819	0.048	0.48	0.005	3	High	0.002	0.0666329
	Mel_mel	MELB	244	255	IASNIINGFAIY	1294.69	8.4135	300	10	10	0.061	0.609	0.016	3	High	0.007	0.0814254
	Mel_mel	MELB	244	255	IASNIINGFAIY	1294.69	8.4144	3000	10	10	0.307	3.069	0.025	3	High	0.01	0.0207497
	Mel_mel	MELB	246	255	SNIINGFAIY	1110.57	8.0633	0	8	0	0	0	n/a	1	High	0
	Mel_mel	MELB	246	255	SNIINGFAIY	1110.57	8.0867	30	8	7.819	0.031	0.385	0.008	3	Medium	0.003	0.0211576
	Mel_mel	MELB	246	255	SNIINGFAIY	1110.57	8.101	300	8	8	0.045	0.562	0.01	3	Medium	0.004	0.0846973
	Mel_mel	MELB	246	255	SNIINGFAIY	1110.57	8.0806	3000	8	8	0.264	3.297	0.026	3	Medium	0.011	0.00121299
	Mel_mel	MELB	252	255	FAIY	512.264	6.0176	0	2	0	0	0	n/a	1	High	0
	Mel_mel	MELB	252	255	FAIY	512.264	6.009	30	2	1.961	0.018	0.913	0.014	3	High	0.006	0.204041
	Mel_mel	MELB	252	255	FAIY	512.264	5.9801	300	2	2	0.017	0.826	0.005	3	High	0.002	0.12573
	Mel_mel	MELB	252	255	FAIY	512.264	5.9528	3000	2	2	0.134	6.682	0.02	3	High	0.008	0.00399083
	Mel_mel	MELB	254	257	IYYF	604.29	7.604	0	2	0	0	0	n/a	1	Medium	0
	Mel_mel	MELB	254	257	IYYF	604.29	7.5668	30	2	2	0	0.003	0.012	3	Medium	0.005	0.987244
	Mel_mel	MELB	254	257	IYYF	604.29	7.5797	300	2	2	0.011	0.57	0.003	3	Medium	0.001	0.0572704
	Mel_mel	MELB	254	257	IYYF	604.29	7.5595	3000	2	2	0.028	1.38	0.037	3	Medium	0.015	0.282343
	Mel_mel	MELB	256	259	YFTY	592.253	5.5469	0	2	0	0	0	n/a	1	High	0
	Mel_mel	MELB	256	259	YFTY	592.253	5.5632	30	2	2	0.016	0.811	0.001	3	High	0	0.0155344
	Mel_mel	MELB	256	259	YFTY	592.253	5.5423	300	2	2	0.033	1.652	0.006	3	High	0.002	0.55695
	Mel_mel	MELB	256	259	YFTY	592.253	5.5436	3000	2	2	0.188	9.414	0.024	3	High	0.01	0.000152456
	Mel_mel	MELB	258	262	TYVIG	551.295	3.706	0	3	0	0	0	n/a	1	Medium	0
	Mel_mel	MELB	258	262	TYVIG	551.295	3.7099	30	3	2.891	0.261	8.712	0.191	3	Medium	0.077	0.0438314
	Mel_mel	MELB	258	262	TYVIG	551.295	3.6651	300	3	3	0.221	7.36	0.128	3	Medium	0.052	0.685138
	Mel_mel	MELB	258	262	TYVIG	551.295	3.7798	3000	3	3	0.366	12.199	0.234	3	Medium	0.094	0.265643
	Mel_mel	MELB	263	267	DADLF	579.254	6.2177	0	3	0	0	0	n/a	1	Medium	0
	Mel_mel	MELB	263	267	DADLF	579.254	6.2248	30	3	2.956	0.173	5.753	0.085	3	Medium	0.034	0.0356201
	Mel_mel	MELB	263	267	DADLF	579.254	6.1428	300	3	3	0.181	6.021	0.067	3	Medium	0.027	0.934227
	Mel_mel	MELB	263	267	DADLF	579.254	6.1813	3000	3	3	0.478	15.942	0.131	3	Medium	0.053	0.00446841
	Mel_mel	MELB	263	270	DADLFPYY	1002.43	8.4277	0	5	0	0	0	n/a	1	High	0
	Mel_mel	MELB	263	270	DADLFPYY	1002.43	8.3963	30	5	4.952	0.182	3.644	0.091	3	High	0.037	0.0381498
	Mel_mel	MELB	263	270	DADLFPYY	1002.43	8.4347	300	5	5	0.225	4.5	0.069	3	High	0.028	0.946017
	Mel_mel	MELB	263	270	DADLFPYY	1002.43	8.4108	3000	5	5	0.58	11.592	0.117	3	Medium	0.047	0.00796158
	Mel_mel	MELB	266	270	LFPYY	701.342	7.2937	0	2	0	0	0	n/a	1	High	0
	Mel_mel	MELB	266	270	LFPYY	701.342	7.2454	30	2	1.996	0.029	1.427	0.053	3	High	0.021	0.651723
	Mel_mel	MELB	266	270	LFPYY	701.342	7.2459	300	2	2	0.038	1.908	0.032	3	High	0.013	0.199854
	Mel_mel	MELB	266	270	LFPYY	701.342	7.2392	3000	2	2	0.202	10.111	0.054	3	Medium	0.022	0.0322719
	Mel_mel	MELB	273	282	YAGAANLLTL	1005.55	7.8533	0	8	0	0	0	n/a	1	High	0
	Mel_mel	MELB	273	282	YAGAANLLTL	1005.55	7.8097	30	8	7.946	0.102	1.28	0.041	3	High	0.016	0.0262049
	Mel_mel	MELB	273	282	YAGAANLLTL	1005.55	7.8084	300	8	8	0.152	1.896	0.053	3	High	0.022	0.0143034
	Mel_mel	MELB	273	282	YAGAANLLTL	1005.55	7.7939	3000	8	8	0.567	7.084	0.106	3	High	0.043	0.466088
	Mel_mel	MELB	274	282	AGAANLLTL	842.486	7.2455	0	7	0	0	0	n/a	1	High	0
	Mel_mel	MELB	274	282	AGAANLLTL	842.486	7.1933	30	7	6.946	0.047	0.678	0.012	3	High	0.005	0.493579
	Mel_mel	MELB	274	282	AGAANLLTL	842.486	7.1939	300	7	7	0.052	0.738	0.026	3	High	0.01	0.143201
	Mel_mel	MELB	274	282	AGAANLLTL	842.486	7.1856	3000	7	7	0.223	3.19	0.089	3	High	0.036	0.956552
	Mel_mel	MELB	281	288	TLIVFPRL	957.601	8.0949	0	5	0	0	0	n/a	1	High	0
	Mel_mel	MELB	281	288	TLIVFPRL	957.601	8.0318	30	5	4.747	0.308	6.155	0.095	3	High	0.038	0.0125734
	Mel_mel	MELB	281	288	TLIVFPRL	957.601	8.0009	300	5	5	0.323	6.47	0.049	3	High	0.02	0.0984495
	Mel_mel	MELB	281	288	TLIVFPRL	957.601	8.0016	3000	5	5	0.577	11.539	0.041	3	High	0.017	0.164725
	Mel_mel	MELB	283	288	IVFPRL	743.469	6.8928	0	3	0	0	0	n/a	1	High	0
	Mel_mel	MELB	283	288	IVFPRL	743.469	6.8565	30	3	2.999	0.266	8.872	0.051	3	Medium	0.021	0.00181925
	Mel_mel	MELB	283	288	IVFPRL	743.469	6.8514	300	3	3	0.28	9.328	0.076	3	Medium	0.031	0.122415
	Mel_mel	MELB	283	288	IVFPRL	743.469	6.8519	3000	3	3	0.569	18.958	0.07	3	Medium	0.028	0.0957265
	Mel_mel	MELB	283	290	IVFPRLVK	970.633	4.3044	0	5	0	0	0	n/a	1	Medium	0
	Mel_mel	MELB	283	290	IVFPRLVK	970.633	4.269	30	5	4.887	0.388	7.754	0.221	3	Medium	0.089	0.102011
	Mel_mel	MELB	283	290	IVFPRLVK	970.633	4.2725	300	5	5	0.538	10.755	0.044	3	Medium	0.018	0.288129
	Mel_mel	MELB	283	290	IVFPRLVK	970.633	4.2766	3000	5	5	1.015	20.297	0.138	3	Medium	0.056	0.155038
	Mel_mel	MELB	289	292	VKML	489.298	3.0198	0	2	0	0	0	n/a	1	Medium	0
	Mel_mel	MELB	289	292	VKML	489.298	2.971	30	2	1.998	0.061	3.038	0.04	3	Medium	0.016	0.860026
	Mel_mel	MELB	289	292	VKML	489.298	2.9618	300	2	2	0.086	4.288	0.03	3	Medium	0.012	0.0702073
	Mel_mel	MELB	289	292	VKML	489.298	2.9927	3000	2	2	0.443	22.138	0.016	3	Medium	0.006	0.464874
	Mel_mel	MELB	291	297	MLSRRIL	887.538	3.1844	0	5	0	0	0	n/a	1	Medium	0
	Mel_mel	MELB	291	297	MLSRRIL	887.538	3.1149	30	5	4.935	0.8	15.994	0.061	3	Medium	0.024	0.0018928
	Mel_mel	MELB	291	297	MLSRRIL	887.538	3.138	300	5	5	0.55	11.006	0.353	3	Medium	0.142	0.0834849
	Mel_mel	MELB	291	297	MLSRRIL	887.538	3.1901	3000	5	5	1.156	23.129	0.16	3	Medium	0.064	0.540353
	Mel_mel	MELB	292	297	LSRRIL	756.497	2.4047	0	4	0	0	0	n/a	1	High	0
	Mel_mel	MELB	292	297	LSRRIL	756.497	2.3818	30	4	3.935	0.711	17.774	0.113	3	Medium	0.045	0.00418725
	Mel_mel	MELB	292	297	LSRRIL	756.497	2.378	300	4	4	0.479	11.966	0.275	3	Medium	0.111	0.0861634
	Mel_mel	MELB	292	297	LSRRIL	756.497	2.4485	3000	4	4	0.861	21.519	0.141	3	Medium	0.057	0.401391
	Mel_mel	MELB	295	301	RILWAGA	785.455	5.4832	0	5	0	0	0	n/a	1	Medium	0
	Mel_mel	MELB	295	301	RILWAGA	785.455	5.4415	30	5	4.925	0.14	2.809	0.116	3	Medium	0.047	0.863348
	Mel_mel	MELB	295	301	RILWAGA	785.455	5.4763	300	5	5	0.074	1.483	0.061	3	Medium	0.025	0.195498
	Mel_mel	MELB	295	301	RILWAGA	785.455	5.476	3000	5	5	0.139	2.775	0.131	3	Medium	0.053	0.308875
	Mel_mel	MELB	308	312	SCAGL	449.194	3.0092	0	3	0	0	0	n/a	1	High	0
	Mel_mel	MELB	308	312	SCAGL	449.194	2.9995	30	3	2.999	0.009	0.284	0.011	3	High	0.005	0.11244
	Mel_mel	MELB	308	312	SCAGL	449.194	2.9884	300	3	3	0.013	0.446	0.009	3	Medium	0.004	0.0785359
	Mel_mel	MELB	308	312	SCAGL	449.194	2.9962	3000	3	3	0.054	1.812	0.073	3	High	0.029	0.315291
	Mel_mel	MELB	308	313	SCAGLF	596.263	6.6209	0	4	0	0	0	n/a	1	High	0
	Mel_mel	MELB	308	313	SCAGLF	596.263	6.5748	30	4	3.997	0.005	0.129	0.014	3	High	0.006	0.458749
	Mel_mel	MELB	308	313	SCAGLF	596.263	6.5331	300	4	4	0.008	0.207	0.008	3	Medium	0.003	0.456587
	Mel_mel	MELB	308	313	SCAGLF	596.263	6.5395	3000	4	4	0.096	2.397	0.049	3	Medium	0.02	0.170648
	Mel_mel	MELB	316	321	ALADIH	638.339	2.2462	0	4	0	0	0	n/a	1	Medium	0
	Mel_mel	MELB	316	321	ALADIH	638.339	2.2294	30	4	3.892	0.714	17.84	0.279	3	Medium	0.112	0.012099
	Mel_mel	MELB	316	321	ALADIH	638.339	2.2324	300	4	4	0.516	12.905	0.1	3	Medium	0.04	0.929379
	Mel_mel	MELB	316	321	ALADIH	638.339	2.2552	3000	4	4	0.981	24.534	0.217	3	Medium	0.087	0.301021
	Mel_mel	MELB	316	325	ALADIHNAAL	1007.54	4.2496	0	8	0	0	0	n/a	1	Medium	0
	Mel_mel	MELB	316	325	ALADIHNAAL	1007.54	4.2217	30	8	7.883	0.53	6.628	0.071	3	Medium	0.029	0.00105609
	Mel_mel	MELB	316	325	ALADIHNAAL	1007.54	4.2196	300	8	8	0.42	5.248	0.136	3	Medium	0.055	0.262823
	Mel_mel	MELB	316	325	ALADIHNAAL	1007.54	4.2084	3000	8	8	1.07	13.373	0.18	3	Medium	0.072	0.056061
	Mel_mel	MELB	317	323	LADIHNA	752.382	1.9659	0	5	0	0	0	n/a	1	High	0
	Mel_mel	MELB	317	323	LADIHNA	752.382	1.9855	30	5	4.892	0.452	9.044	0.149	3	Medium	0.06	0.0133943
	Mel_mel	MELB	317	323	LADIHNA	752.382	2.0218	300	5	5	0.291	5.811	0.168	3	Medium	0.067	0.151938
	Mel_mel	MELB	317	323	LADIHNA	752.382	1.9877	3000	5	5	0.663	13.262	0.135	3	Medium	0.054	0.0572723
	Mel_mel	MELB	317	325	LADIHNAAL	936.503	3.6802	0	7	0	0	0	n/a	1	High	0
	Mel_mel	MELB	317	325	LADIHNAAL	936.503	3.6448	30	7	6.883	0.459	6.558	0.039	3	High	0.016	0.000335636
	Mel_mel	MELB	317	325	LADIHNAAL	936.503	3.6491	300	7	7	0.364	5.206	0.149	3	Medium	0.06	0.12393
	Mel_mel	MELB	317	325	LADIHNAAL	936.503	3.6561	3000	7	7	0.956	13.651	0.125	3	High	0.05	0.0581191
	Mel_mel	MELB	341	343	WVL	416.242	7.6579	0	1	0	0	0	n/a	1	Medium	0
	Mel_mel	MELB	341	343	WVL	416.242	7.6137	30	1	0.968	0.016	1.564	0.057	3	Medium	0.023	0.579431
	Mel_mel	MELB	341	343	WVL	416.242	7.6012	300	1	1	0.014	1.41	0.049	3	Medium	0.02	0.156406
	Mel_mel	MELB	341	343	WVL	416.242	7.5936	3000	1	1	0.008	0.758	0.017	3	Medium	0.007	0.688115
	Mel_mel	MELB	348	358	VADTVDYGEFK	1242.58	4.3751	0	9	0	0	0	n/a	1	High	0
	Mel_mel	MELB	348	358	VADTVDYGEFK	1242.58	4.3411	30	9	8.994	0.107	1.19	0.082	3	High	0.033	0.428535
	Mel_mel	MELB	348	358	VADTVDYGEFK	1242.58	4.3235	300	9	9	0.12	1.337	0.046	3	High	0.019	0.0973134
	Mel_mel	MELB	348	358	VADTVDYGEFK	1242.58	4.3136	3000	9	9	0.29	3.219	0.133	3	High	0.054	0.897218
	Mel_mel	MELB	348	359	VADTVDYGEFKL	1355.66	6.9814	0	10	0	0	0	n/a	1	Medium	0
	Mel_mel	MELB	348	359	VADTVDYGEFKL	1355.66	6.9665	30	10	9.992	0.05	0.496	0.147	3	Medium	0.059	0.443602
	Mel_mel	MELB	348	359	VADTVDYGEFKL	1355.66	6.9565	300	10	10	0.087	0.872	0.143	3	Medium	0.058	0.103154
	Mel_mel	MELB	348	359	VADTVDYGEFKL	1355.66	6.9168	3000	10	10	0.347	3.47	0.18	3	Medium	0.072	0.310481
	Mel_mel	MELB	350	358	DTVDYGEFK	1072.47	4.1127	0	7	0	0	0	n/a	1	High	0
	Mel_mel	MELB	350	358	DTVDYGEFK	1072.47	4.0826	30	7	6.994	0.08	1.143	0.054	3	High	0.022	0.5267
	Mel_mel	MELB	350	358	DTVDYGEFK	1072.47	4.0905	300	7	7	0.087	1.239	0.057	3	High	0.023	0.056868
	Mel_mel	MELB	350	358	DTVDYGEFK	1072.47	4.0943	3000	7	7	0.162	2.32	0.058	3	High	0.023	0.564399
	Mel_mel	MELB	363	367	CESIA	521.216	2.1353	0	3	0	0	0	n/a	1	High	0
	Mel_mel	MELB	363	367	CESIA	521.216	2.132	30	3	2.999	0.223	7.439	0.12	3	Medium	0.048	0.0446327
	Mel_mel	MELB	363	367	CESIA	521.216	2.1278	300	3	3	0.35	11.665	0.216	3	Medium	0.087	0.0590136
	Mel_mel	MELB	363	367	CESIA	521.216	2.1313	3000	3	3	0.955	31.821	0.122	3	Medium	0.049	0.579999
	Mel_mel	MELB	368	373	YSVQTM	727.321	3.6693	0	4	0	0	0	n/a	1	High	0
	Mel_mel	MELB	368	373	YSVQTM	727.321	3.645	30	4	3.999	0.048	1.207	0.022	3	High	0.009	0.0278234
	Mel_mel	MELB	368	373	YSVQTM	727.321	3.6525	300	4	4	0.065	1.628	0.076	3	High	0.03	0.049817
	Mel_mel	MELB	368	373	YSVQTM	727.321	3.6596	3000	4	4	0.322	8.049	0.227	3	Medium	0.091	0.0938428
	Mel_mel	MELB	372	383	TMVVKGGSAFAA	1137.59	3.6218	0	10	0	0	0	n/a	1	Medium	0
	Mel_mel	MELB	372	383	TMVVKGGSAFAA	1137.59	3.5971	30	10	9.913	0.056	0.555	0.037	3	Medium	0.015	0.217308
	Mel_mel	MELB	372	383	TMVVKGGSAFAA	1137.59	3.5945	300	10	10	0.083	0.827	0.124	3	Medium	0.05	0.451882
	Mel_mel	MELB	372	383	TMVVKGGSAFAA	1137.59	3.6137	3000	10	10	0.208	2.079	0.023	3	Medium	0.009	0.0919055
	Mel_mel	MELB	374	383	VVKGGSAFAA	905.497	2.5213	0	8	0	0	0	n/a	1	High	0
	Mel_mel	MELB	374	383	VVKGGSAFAA	905.497	2.5133	30	8	8	0.076	0.956	0.032	3	Medium	0.013	0.0822731
	Mel_mel	MELB	374	383	VVKGGSAFAA	905.497	2.5149	300	8	8	0.079	0.986	0.01	3	High	0.004	0.240104
	Mel_mel	MELB	374	383	VVKGGSAFAA	905.497	2.5355	3000	8	8	0.176	2.205	0.091	3	Medium	0.037	0.14625
	Mel_mel	MELB	377	383	GGSAFAA	579.265	2.956	0	5	0	0	0	n/a	1	Medium	0
	Mel_mel	MELB	377	383	GGSAFAA	579.265	2.9265	30	5	5	0.037	0.738	0.018	3	Medium	0.007	0.748984
	Mel_mel	MELB	377	383	GGSAFAA	579.265	2.9315	300	5	5	0.039	0.779	0.027	3	Medium	0.011	0.738621
	Mel_mel	MELB	377	383	GGSAFAA	579.265	2.9607	3000	5	5	0.03	0.601	0.02	3	Medium	0.008	0.685491
	Mel_mel	MELB	381	385	FAAFF	601.29	8.9284	0	3	0	0	0	n/a	1	Medium	0
	Mel_mel	MELB	381	385	FAAFF	601.29	8.8654	30	3	3	0.077	2.557	0.027	3	Medium	0.011	0.137318
	Mel_mel	MELB	381	385	FAAFF	601.29	8.8453	300	3	3	0.078	2.588	0.041	3	Medium	0.017	0.190554
	Mel_mel	MELB	381	385	FAAFF	601.29	8.8332	3000	3	3	0.112	3.723	0.053	3	Medium	0.021	0.053762
	Mel_mel	MELB	393	403	IGYTPNVAQSA	1119.56	3.4382	0	8	0	0	0	n/a	1	High	0
	Mel_mel	MELB	393	403	IGYTPNVAQSA	1119.56	3.433	30	8	7.999	0.731	9.136	0.521	3	Medium	0.21	0.174293
	Mel_mel	MELB	393	403	IGYTPNVAQSA	1119.56	3.4275	300	8	8	0.629	7.861	0.38	3	Medium	0.153	0.168585
	Mel_mel	MELB	393	403	IGYTPNVAQSA	1119.56	3.3906	3000	8	8	1.354	16.922	0.358	3	Medium	0.144	0.0227244
	Mel_mel	MELB	393	404	IGYTPNVAQSAQ	1247.61	3.1155	0	9	0	0	0	n/a	1	High	0
	Mel_mel	MELB	393	404	IGYTPNVAQSAQ	1247.61	3.1167	30	9	8.999	0.42	4.67	0.433	3	High	0.174	0.20829
	Mel_mel	MELB	393	404	IGYTPNVAQSAQ	1247.61	3.0919	300	9	9	0.351	3.902	0.279	3	Medium	0.112	0.863166
	Mel_mel	MELB	393	404	IGYTPNVAQSAQ	1247.61	3.1278	3000	9	9	0.56	6.227	0.296	3	Medium	0.119	0.037711
	Mel_mel	MELB	393	405	IGYTPNVAQSAQT	1348.66	3.1951	0	10	0	0	0	n/a	1	High	0
	Mel_mel	MELB	393	405	IGYTPNVAQSAQT	1348.66	3.1932	30	10	9.999	0.499	4.986	0.641	3	Medium	0.258	0.262596
	Mel_mel	MELB	393	405	IGYTPNVAQSAQT	1348.66	3.1575	300	10	10	0.392	3.919	0.277	3	High	0.112	0.84897
	Mel_mel	MELB	393	405	IGYTPNVAQSAQT	1348.66	3.1723	3000	10	10	0.636	6.363	0.456	3	Medium	0.183	0.0780332
	Mel_mel	MELB	405	413	TLQGMQFIM	1067.51	8.5247	0	7	0	0	0	n/a	1	Medium	0
	Mel_mel	MELB	405	413	TLQGMQFIM	1067.51	8.4358	30	7	6.979	0.073	1.05	0.135	3	Medium	0.054	0.211634
	Mel_mel	MELB	405	413	TLQGMQFIM	1067.51	8.4361	300	7	7	0.049	0.706	0.043	3	Medium	0.017	0.637615
	Mel_mel	MELB	405	413	TLQGMQFIM	1067.51	8.4572	3000	7	7	0.133	1.898	0.033	3	Medium	0.013	0.0997572
	Mel_mel	MELB	407	411	QGMQF	609.258	5.2545	0	3	0	0	0	n/a	1	Medium	0
	Mel_mel	MELB	407	411	QGMQF	609.258	5.2053	30	3	3	0.082	2.741	0.026	3	Medium	0.011	0.142959
	Mel_mel	MELB	407	411	QGMQF	609.258	5.2462	300	3	3	0.104	3.476	0.016	3	Medium	0.006	0.433634
	Mel_mel	MELB	407	411	QGMQF	609.258	5.2075	3000	3	3	0.191	6.371	0.046	3	Medium	0.019	0.0591085
	Mel_mel	MELB	412	416	IMIVL	587.372	7.922	0	3	0	0	0	n/a	1	Medium	0
	Mel_mel	MELB	412	416	IMIVL	587.372	7.8832	30	3	2.83	-0.031	-1.024	0.023	3	Medium	0.009	0.405563
	Mel_mel	MELB	412	416	IMIVL	587.372	7.9154	300	3	3	-0.02	-0.664	0.089	3	Medium	0.036	0.500977
	Mel_mel	MELB	412	416	IMIVL	587.372	7.8495	3000	3	3	-0.053	-1.759	0.032	3	Medium	0.013	0.236786
	Mel_mel	MELB	414	419	IVLPVL	652.452	7.8567	0	3	0	0	0	n/a	1	Medium	0
	Mel_mel	MELB	414	419	IVLPVL	652.452	7.808	30	3	2.806	0.01	0.317	0.017	3	High	0.007	0.976594
	Mel_mel	MELB	414	419	IVLPVL	652.452	7.788	300	3	3	0.011	0.361	0.02	3	Medium	0.008	0.719011
	Mel_mel	MELB	414	419	IVLPVL	652.452	7.8184	3000	3	3	0.011	0.375	0.003	3	High	0.001	0.691621
	Mel_mel	MELB	420	422	FFM	443.188	7.0389	0	1	0	0	0	n/a	1	Medium	0
	Mel_mel	MELB	420	422	FFM	443.188	6.9858	30	1	1	0.016	1.646	0.052	3	Medium	0.021	0.882875
	Mel_mel	MELB	420	422	FFM	443.188	6.9475	300	1	1	0.003	0.341	0.009	3	Medium	0.004	0.397064
	Mel_mel	MELB	420	422	FFM	443.188	6.9708	3000	1	1	0.029	2.934	0.06	3	Medium	0.024	0.619452
	Mel_mel	MELB	420	423	FFMM	574.228	8.6062	0	2	0	0	0	n/a	1	High	0
	Mel_mel	MELB	420	423	FFMM	574.228	8.5383	30	2	2	-0.004	-0.213	0.001	3	High	0	0.00106949
	Mel_mel	MELB	420	423	FFMM	574.228	8.5403	300	2	2	-0.01	-0.484	0.024	3	High	0.01	0.594731
	Mel_mel	MELB	420	423	FFMM	574.228	8.5196	3000	2	2	0	-0.02	0.008	3	High	0.003	0.395533
	Mel_mel	MELB	420	424	FFMMT	675.276	7.6469	0	3	0	0	0	n/a	1	Medium	0
	Mel_mel	MELB	420	424	FFMMT	675.276	7.6026	30	3	3	0.004	0.144	0.012	3	Medium	0.005	0.368524
	Mel_mel	MELB	420	424	FFMMT	675.276	7.6009	300	3	3	0.013	0.439	0.026	3	Medium	0.011	0.272469
	Mel_mel	MELB	420	424	FFMMT	675.276	7.5969	3000	3	3	0.007	0.233	0.036	3	Medium	0.015	0.459313
	Mel_mel	MELB	420	425	FFMMTL	788.36	10.152	0	4	0	0	0	n/a	1	Medium	0
	Mel_mel	MELB	420	425	FFMMTL	788.36	10.0892	30	4	3.999	0.1	2.499	0.101	3	Medium	0.041	0.0510655
	Mel_mel	MELB	420	425	FFMMTL	788.36	10.0744	300	4	4	0.026	0.657	0.05	3	Medium	0.02	0.87006
	Mel_mel	MELB	420	425	FFMMTL	788.36	10.0466	3000	4	4	0.05	1.255	0.035	3	Medium	0.014	0.0240799
	Mel_mel	MELB	421	424	FMMT	528.208	4.4377	0	2	0	0	0	n/a	1	High	0
	Mel_mel	MELB	421	424	FMMT	528.208	4.4132	30	2	2	0.05	2.494	0.03	3	High	0.012	0.0940433
	Mel_mel	MELB	421	424	FMMT	528.208	4.4028	300	2	2	0.062	3.082	0.04	3	High	0.016	0.457509
	Mel_mel	MELB	421	424	FMMT	528.208	4.3837	3000	2	2	0.062	3.098	0.083	3	Medium	0.033	0.734156
	Mel_mel	MELB	422	425	MMTL	494.223	5.6855	0	2	0	0	0	n/a	1	Medium	0
	Mel_mel	MELB	422	425	MMTL	494.223	5.6222	30	2	1.999	0.023	1.172	0.033	3	Medium	0.013	0.0530147
	Mel_mel	MELB	422	425	MMTL	494.223	5.5907	300	2	2	0.022	1.084	0.024	3	Medium	0.01	0.869797
	Mel_mel	MELB	422	425	MMTL	494.223	5.5793	3000	2	2	0.111	5.545	0.117	3	Medium	0.047	0.197482
	Mel_mel	MELB	426	430	VLYFR	696.396	4.7138	0	3	0	0	0	n/a	1	Medium	0
	Mel_mel	MELB	426	430	VLYFR	696.396	4.6853	30	3	2.997	-0.009	-0.29	0.007	3	High	0.003	0.726309
	Mel_mel	MELB	426	430	VLYFR	696.396	4.6857	300	3	3	-0.009	-0.302	0.016	3	High	0.006	0.272401
	Mel_mel	MELB	426	430	VLYFR	696.396	4.6691	3000	3	3	0.003	0.087	0.015	3	High	0.006	0.294974
	Mel_mel	MELB	426	431	VLYFRY	859.459	6.3557	0	4	0	0	0	n/a	1	Medium	0
	Mel_mel	MELB	426	431	VLYFRY	859.459	6.3406	30	4	3.997	0.032	0.797	0.011	3	Medium	0.004	0.702597
	Mel_mel	MELB	426	431	VLYFRY	859.459	6.3492	300	4	4	0.049	1.231	0.01	3	Medium	0.004	0.0526324
	Mel_mel	MELB	426	431	VLYFRY	859.459	6.3265	3000	4	4	0.066	1.657	0.03	3	Medium	0.012	0.1083
	Mel_mel	MELB	428	431	YFRY	647.307	4.1338	0	2	0	0	0	n/a	1	Medium	0
	Mel_mel	MELB	428	431	YFRY	647.307	4.1003	30	2	2	0.014	0.696	0.019	3	Medium	0.008	0.622561
	Mel_mel	MELB	428	431	YFRY	647.307	4.1046	300	2	2	0.021	1.073	0.015	3	Medium	0.006	0.0534503
	Mel_mel	MELB	428	431	YFRY	647.307	4.1328	3000	2	2	0.023	1.168	0.083	3	Medium	0.033	0.639024
	Mel_mel	MELB	431	434	YYRL	613.322	4.1021	0	2	0	0	0	n/a	1	High	0
	Mel_mel	MELB	431	434	YYRL	613.322	4.0914	30	2	2	0.054	2.714	0.031	3	High	0.012	0.960928
	Mel_mel	MELB	431	434	YYRL	613.322	4.0708	300	2	2	0.062	3.123	0.008	3	High	0.003	0.136517
	Mel_mel	MELB	431	434	YYRL	613.322	4.0815	3000	2	2	0.085	4.233	0.025	3	High	0.01	0.324338
	Mel_mel	MELB	438	443	MLRKIQ	787.474	1.74	0	4	0	0	0	n/a	1	Medium	0
	Mel_mel	MELB	438	443	MLRKIQ	787.474	1.7408	30	4	3.988	0.257	6.42	0.115	3	Medium	0.046	0.352278
	Mel_mel	MELB	438	443	MLRKIQ	787.474	1.7481	300	4	4	0.313	7.834	0.17	3	Medium	0.068	0.0983246
	Mel_mel	MELB	438	443	MLRKIQ	787.474	1.7931	3000	4	4	1.312	32.796	0.108	3	Medium	0.044	0.0983693
	Mel_mel	MELB	440	447	RKIQIHLL	1019.66	4.2179	0	6	0	0	0	n/a	1	High	0
	Mel_mel	MELB	440	447	RKIQIHLL	1019.66	4.2025	30	6	5.929	0.258	4.304	0.125	3	High	0.05	0.104452
	Mel_mel	MELB	440	447	RKIQIHLL	1019.66	4.193	300	6	6	0.574	9.56	0.336	3	Medium	0.135	0.0741143
	Mel_mel	MELB	440	447	RKIQIHLL	1019.66	4.175	3000	6	6	1.739	28.987	0.294	3	Medium	0.118	0.033209
	Mel_mel	MELB	442	447	IQIHLL	735.464	6.4598	0	4	0	0	0	n/a	1	Medium	0
	Mel_mel	MELB	442	447	IQIHLL	735.464	6.4071	30	4	3.941	0.124	3.089	0.088	3	Medium	0.036	0.189428
	Mel_mel	MELB	442	447	IQIHLL	735.464	6.383	300	4	4	0.267	6.687	0.132	3	Medium	0.053	0.135081
	Mel_mel	MELB	442	447	IQIHLL	735.464	6.3821	3000	4	4	1.34	33.502	0.191	3	Medium	0.077	0.563953
	Mel_mel	MELB	444	447	IHLL	494.322	4.8908	0	2	0	0	0	n/a	1	Medium	0
	Mel_mel	MELB	444	447	IHLL	494.322	4.8808	30	2	1.946	0.1	4.984	0.181	3	Medium	0.073	0.929986
	Mel_mel	MELB	444	447	IHLL	494.322	4.8852	300	2	2	0.257	12.828	0.071	3	Medium	0.028	0.286344
	Mel_mel	MELB	444	447	IHLL	494.322	4.8849	3000	2	2	0.617	30.867	0.148	3	Medium	0.06	0.278382
	Mel_mel	MELB	448	466	DKYRKTPPFVEQPDSPAIS	2174.1	3.4503	0	13	0	0	0	n/a	1	Medium	0
	Mel_mel	MELB	448	466	DKYRKTPPFVEQPDSPAIS	2174.1	3.3921	30	13	12.945	6.824	52.489	0.738	3	Medium	0.297	0.998286
	Mel_mel	MELB	448	466	DKYRKTPPFVEQPDSPAIS	2174.1	3.2979	300	13	13	6.863	52.794	0.826	3	Medium	0.332	0.817595
	Mel_mel	MELB	448	466	DKYRKTPPFVEQPDSPAIS	2174.1	3.3356	3000	13	13	7.348	56.521	0.561	3	Medium	0.226	0.917636
	Mel_mel	MELB	448	467	DKYRKTPPFVEQPDSPAISV	2273.17	4.536	0	14	0	0	0	n/a	1	High	0
	Mel_mel	MELB	448	467	DKYRKTPPFVEQPDSPAISV	2273.17	4.4861	30	14	13.944	7.857	56.124	0.932	3	High	0.375	0.471009
	Mel_mel	MELB	448	467	DKYRKTPPFVEQPDSPAISV	2273.17	4.4901	300	14	14	8.144	58.175	0.395	3	High	0.159	0.848178
	Mel_mel	MELB	448	467	DKYRKTPPFVEQPDSPAISV	2273.17	4.4741	3000	14	14	8.574	61.245	0.613	3	High	0.247	0.955449
	Mel_mel	MELB	450	466	YRKTPPFVEQPDSPAIS	1930.98	3.6142	0	11	0	0	0	n/a	1	High	0
	Mel_mel	MELB	450	466	YRKTPPFVEQPDSPAIS	1930.98	3.6079	30	11	10.945	6.536	59.418	0.699	3	High	0.282	0.439289
	Mel_mel	MELB	450	466	YRKTPPFVEQPDSPAIS	1930.98	3.5892	300	11	11	6.761	61.466	0.14	3	High	0.056	0.404112
	Mel_mel	MELB	450	466	YRKTPPFVEQPDSPAIS	1930.98	3.5979	3000	11	11	6.788	61.706	0.204	3	High	0.082	0.259263
	Mel_mel	MELB	450	467	YRKTPPFVEQPDSPAISV	2030.05	4.7403	0	12	0	0	0	n/a	1	High	0
	Mel_mel	MELB	450	467	YRKTPPFVEQPDSPAISV	2030.05	4.7191	30	12	11.944	7.403	61.696	0.524	3	High	0.211	0.343148
	Mel_mel	MELB	450	467	YRKTPPFVEQPDSPAISV	2030.05	4.6787	300	12	12	7.562	63.015	0.062	3	High	0.025	0.611909
	Mel_mel	MELB	450	467	YRKTPPFVEQPDSPAISV	2030.05	4.7098	3000	12	12	7.531	62.759	0.414	3	High	0.167	0.948091
	Mel_mel	MELB	450	468	YRKTPPFVEQPDSPAISVV	2129.12	5.1263	0	13	0	0	0	n/a	1	High	0
	Mel_mel	MELB	450	468	YRKTPPFVEQPDSPAISVV	2129.12	5.0341	30	13	12.868	8.095	62.272	0.72	3	High	0.29	0.347314
	Mel_mel	MELB	450	468	YRKTPPFVEQPDSPAISVV	2129.12	5.016	300	13	13	8.265	63.581	0.514	3	High	0.207	0.805592
	Mel_mel	MELB	450	468	YRKTPPFVEQPDSPAISVV	2129.12	5.0097	3000	13	13	8.378	64.448	0.452	3	High	0.182	0.48479
	Mel_mel	MELB	450	469	YRKTPPFVEQPDSPAISVVA	2200.15	4.8567	0	14	0	0	0	n/a	1	High	0
	Mel_mel	MELB	450	469	YRKTPPFVEQPDSPAISVVA	2200.15	4.8063	30	14	13.868	8.554	61.101	0.957	3	High	0.385	0.878639
	Mel_mel	MELB	450	469	YRKTPPFVEQPDSPAISVVA	2200.15	4.8017	300	14	14	8.514	60.816	0.326	3	Medium	0.131	0.617346
	Mel_mel	MELB	450	469	YRKTPPFVEQPDSPAISVVA	2200.15	4.7894	3000	14	14	8.645	61.747	0.632	3	High	0.254	0.900848
